# Supplementary material
Source: publisher site journal article supplement (https://www.dovepress.com/get_supplementary_file.php?f=444774.xlsx)
Supplement: Supplementary file 1 [file get_supplementary_file.php]

## Sheet: Supplementary Table S1
Supplementary Table S1. 3779 CV genes recognized for WGCNA construction.
gene	GSM3622418	GSM3622421	GSM3622423	GSM3622426	GSM3622429	GSM3622431	GSM3622434	GSM3622436	GSM3622439	GSM3622442	GSM3622445	GSM3622447	GSM3622450	GSM3622453	GSM3622455	GSM3622458	GSM3622461	GSM3622463	GSM3622466	GSM3622469	GSM3622471	GSM3622474	GSM3622477	GSM3622479	GSM3622482	GSM3622485	GSM3622487	GSM3622490	GSM3622493	GSM3622496	GSM3622499	GSM3622502	GSM3622504	GSM3622507	GSM3622510	GSM3622512	GSM3622515	GSM3622518	GSM3622520	GSM3622523	GSM3622526	GSM3622529	GSM3622531	GSM3622534	GSM3622536	GSM3622539	GSM4343664	GSM4343666	GSM4343669
ADA	7.35814	7.79885	7.47473	7.34028	7.27965	6.97072	7.46653	7.13955	7.14382	6.95114	7.17053	7.79225	7.45702	7.34788	8.34602	6.94282	7.35143	7.0448	7.83443	7.44157	7.31251	6.9648	7.41602	6.86715	7.42805	6.90276	7.08004	7.31179	7.45737	7.98528	7.19762	7.56258	7.44799	6.70116	7.30581	7.49703	7.28434	6.88382	7.45118	7.14795	7.06987	7.73376	7.50942	7.8553	7.80435	7.44224	7.0311	7.87232	7.46336
CDH2	6.02355	5.52768	5.54848	5.85896	5.80549	5.62638	6.76321	5.99371	5.55984	5.71219	5.94627	5.29648	5.40278	5.56281	5.72708	6.2716	5.9235	5.84962	6.04518	5.46187	5.39411	5.78128	5.61146	5.42628	5.36187	5.46153	5.63403	5.79078	5.67189	5.64937	6.36389	5.77924	5.80522	5.75421	5.75518	5.5481	5.46559	5.46364	5.45564	5.70128	5.6649	5.34781	5.5354	5.54378	5.90551	5.32836	5.73441	6.1738	5.51299
NAALAD2	3.74589	3.23414	3.17902	4.06187	3.38729	3.57893	3.2872	4.1054	3.68576	3.49068	3.23646	3.44893	3.64725	3.94256	3.51615	3.82321	3.72236	3.61748	3.40008	3.28705	3.64848	3.26899	3.47274	3.6566	3.34689	3.47177	4.70287	2.99375	3.7846	3.17123	3.45903	3.45536	3.18378	3.52061	3.33586	3.65012	4.31991	3.97083	3.63234	3.15965	3.41405	3.62707	3.78014	3.40958	3.23238	3.4908	3.41405	3.29762	3.35373
KCNE3	7.22054	7.20559	7.08308	7.26799	7.08946	8.0475	6.69101	7.53339	7.1657	7.49057	7.09414	6.94386	6.85474	6.65552	7.31321	7.66244	7.49326	7.28218	7.08374	7.00368	7.82168	7.74332	7.46784	7.63851	7.35529	7.06085	7.59115	6.99756	7.55804	6.51768	7.10716	7.18308	7.53651	7.79849	7.35345	7.4305	7.45195	7.71011	7.36211	8.68121	7.41716	7.42594	7.14527	6.52525	7.05536	7.00811	7.36515	7.0213	6.96024
CDH3	7.71032	7.57263	8.23528	8.04144	7.53789	8.47989	7.79761	8.21487	7.42891	7.91739	7.46558	7.76132	8.17442	8.50719	8.31967	7.82247	8.05502	7.63553	8.98811	7.81534	8.05524	8.0642	8.51768	8.66012	7.89662	7.25421	10.5103	7.92614	9.16616	8.82565	8.47855	7.64144	8.01163	6.77535	7.62016	7.4055	7.35953	6.95422	7.73078	8.10096	8.64077	8.32623	8.6632	8.74522	8.19848	7.60836	8.16412	9.14375	7.81936
TMEM170B	7.83481	7.80737	7.64376	7.84556	7.57523	8.01503	7.83974	7.25962	8.23877	7.49067	7.82876	7.67395	7.41419	8.07903	7.1841	8.25043	7.79605	8.26128	6.3726	7.68434	8.19869	8.64329	7.6498	7.95639	8.07516	7.14409	7.53155	7.7906	8.2089	7.60987	7.915	7.87615	7.93985	8.13718	8.44039	7.65913	8.36756	7.78901	8.18409	8.46944	8.20342	8.55148	8.07695	7.48882	7.93776	6.85001	7.44581	6.37825	7.65587
HOTAIR	2.69235	2.77139	2.62338	2.80312	2.72555	2.56047	2.71956	2.56779	2.8673	2.44259	2.77936	2.69332	3.02757	2.79859	2.82343	2.52055	2.7407	2.94721	2.6804	2.63831	3.00598	2.67329	2.63158	2.66464	2.66917	2.80614	2.54642	2.68126	2.89357	2.83351	2.82941	2.89585	2.67878	3.08	2.75411	2.64221	2.48473	2.58635	2.68916	2.6371	2.7178	2.82754	2.60093	2.82181	2.85594	2.69772	2.55518	2.67884	2.63087
TMPO-AS1	4.52791	4.56458	4.94513	4.29523	4.78875	4.34779	4.85125	4.89267	5.14796	4.61563	4.97263	4.83603	4.71566	4.63078	5.18153	4.9331	4.96385	4.40763	4.76689	5.10342	5.1219	4.6921	4.79848	5.02841	4.55093	4.97476	5.06114	4.89235	4.50001	4.38836	5.29253	4.56761	4.77937	5.00902	5.072	4.9302	5.11468	5.46634	5.30241	4.74511	5.00337	4.74208	4.914	4.40301	4.80566	4.77706	5.14336	4.75555	5.11441
LOC100128288	3.44996	3.10342	2.92193	3.15036	3.1801	3.09816	3.19074	3.08394	3.45435	3.06221	3.10064	3.17492	3.61255	2.92674	3.17912	2.96793	3.26283	3.52562	2.78964	3.20015	3.39109	3.41993	3.18907	3.3305	3.09664	3.3331	3.16089	3.27774	3.23916	3.41214	3.18201	3.30423	3.40299	3.47139	3.42142	3.1932	3.11848	2.94698	3.33208	3.23228	3.41693	2.96015	2.87747	3.31916	3.46448	3.07714	3.36744	2.85877	3.22427
MATN1-AS1	4.38766	4.63532	4.97823	4.37367	4.73571	4.49859	4.65079	4.71836	4.58374	4.65556	4.70011	4.85157	4.50974	4.7288	4.35579	4.4119	4.23909	4.99357	4.5919	4.6162	4.336	4.55272	4.42899	4.71284	4.60112	4.59861	4.97379	4.5995	4.29156	4.81483	4.76108	4.34718	4.51054	5.07812	4.89655	4.43774	4.36094	4.70547	4.92586	5.13396	4.50387	4.3774	4.78314	4.66357	4.51382	4.43331	4.53037	4.55034	4.59627
DDC-AS1	3.92894	3.79529	3.954	3.86224	4.28772	3.61057	3.75766	3.70031	3.57429	3.60923	3.57602	3.76741	4.07585	3.91934	3.94224	3.78579	3.68168	3.81714	3.63418	3.66087	3.73722	3.67538	3.69472	3.75544	3.43655	3.88406	3.55785	3.80314	3.60875	3.7731	3.87559	3.78882	3.57838	3.50707	3.64824	3.84444	3.81851	3.48199	3.833	3.59283	3.65906	3.75858	4.03602	3.95446	3.77963	3.83572	3.74044	3.62206	3.71736
LOC100129917	3.50483	3.32479	3.0751	3.29536	3.305	3.02329	2.88601	2.95249	3.46762	3.29772	3.49845	3.28487	3.41022	3.02577	3.26274	3.15583	3.32659	3.31582	2.99448	3.56456	3.13104	3.00228	3.10725	3.08898	3.36756	3.3523	3.03671	3.12646	2.90166	3.1302	3.17748	3.23456	3.02172	3.24372	3.2818	3.32509	3.64451	3.12876	3.08558	3.12361	3.06666	3.34884	3.04295	3.22103	3.12713	3.5403	3.45735	2.99931	3.58431
CERNA1	3.83744	3.4163	3.97812	4.19921	3.77772	3.80191	3.80382	4.25132	4.00362	4.65439	3.52132	3.82478	3.84161	3.72384	3.97068	3.91253	3.75626	4.32286	4.26656	3.66651	3.72507	4.67004	3.37444	3.96509	4.22662	3.79743	3.93561	3.59059	3.8296	3.72036	3.98479	3.43006	3.80346	4.13578	3.46116	3.48814	3.54404	4.00236	3.80546	4.12914	3.89921	3.75199	3.67473	4.10136	3.81757	3.75252	3.84794	4.41131	3.73019
ATP6V1FNB	6.69702	5.33001	5.45098	5.97288	5.73129	6.02034	5.3369	5.87713	5.92627	5.59086	5.68906	5.49805	5.65094	5.95238	5.59608	5.7114	5.53142	5.68509	5.59046	5.02989	5.55071	5.7878	5.20697	5.28087	5.45658	5.53446	4.97816	5.35092	5.83311	5.43682	5.47434	5.71892	5.2645	6.13128	5.64284	5.99369	5.52739	5.53938	5.54317	5.20457	5.55129	5.00429	5.4398	5.85744	5.37642	5.88387	5.23488	5.66128	5.04376
AGAP2-AS1	7.48818	7.22529	6.96913	6.7507	7.23228	6.77054	6.74458	6.93338	7.07805	7.04057	6.95957	7.1067	7.98632	6.76021	7.95669	7.20785	7.24835	6.94473	6.85744	7.381	7.22377	6.47609	7.06817	6.93784	7.04826	6.70763	7.37276	7.4835	7.10706	7.25417	6.77501	7.80037	7.32933	6.72828	6.98568	7.04363	6.76742	6.91225	7.63371	6.67671	7.1224	7.0451	6.83382	6.98506	7.66478	6.65905	6.87134	6.87305	7.36624
USP3-AS1	3.38441	3.44711	3.46776	3.21667	3.09916	3.58883	3.28315	3.38997	3.37816	3.50925	3.03811	3.38163	3.53934	3.44778	3.43224	3.17407	3.38536	3.37699	3.69409	3.15803	3.42613	3.3594	3.42676	3.33437	3.38741	3.40432	3.71608	3.14542	3.13964	3.01364	3.36001	3.68605	3.12543	3.31619	3.14132	3.31911	3.44281	3.42596	3.52604	3.68277	3.28648	3.26515	3.29091	3.31037	3.31867	3.33971	3.45282	3.68765	3.22858
PSORS1C3	4.23662	4.29293	5.75222	6.27793	4.13891	3.97144	5.45287	4.01806	5.27251	4.08065	4.28226	4.32212	5.75587	4.32791	3.98431	4.07941	4.73949	5.55946	4.94909	4.16983	5.10753	4.27592	3.9863	5.52326	4.12711	4.12592	4.30844	3.90365	5.38232	4.67566	4.3332	4.31766	3.99178	4.08531	4.10284	3.89589	3.97524	4.01755	4.08341	3.82053	4.86892	3.98823	4.15693	4.41346	4.20638	4.09157	4.2472	5.37209	4.38069
LOC100130964	3.0908	2.93103	3.15194	3.50936	3.0669	3.07606	2.89339	3.07596	2.8585	2.93931	3.14297	2.95537	2.9911	2.97282	3.30135	2.98253	3.04076	3.0242	2.97076	2.98253	2.79789	3.11574	3.25224	3.00592	2.89336	3.16178	3.03471	3.1267	2.89311	2.88008	2.91031	3.04076	3.11523	3.26782	2.85246	2.98297	2.91356	3.04846	2.93001	2.9628	2.8494	3.13811	2.86798	2.90716	3.02549	3.29434	3.1758	2.95779	3.04202
LOC100130987	6.49782	6.95363	6.4961	6.5202	6.42794	6.64942	6.72626	6.72531	6.6424	6.73948	6.76027	6.58187	6.60198	5.62862	6.5681	6.78918	6.68239	5.85063	6.8314	6.87211	6.66029	6.88161	6.79923	6.58005	6.72339	6.54394	6.65706	7.13691	6.70544	6.84781	6.94493	6.72986	7.02072	6.93428	7.08704	6.81261	5.85361	6.91627	6.39702	7.02883	6.52629	6.59267	6.81621	6.67281	6.46043	6.48323	7.33882	6.74774	7.21203
LOC100130992	3.66547	3.60323	3.68469	3.64608	3.59876	3.50579	3.58605	3.59384	4.18829	3.74747	3.58861	3.88925	4.06556	3.80919	3.62629	3.42133	3.60019	3.83683	3.74316	3.77649	3.80269	3.30164	3.79201	3.73311	3.63679	3.54753	4.23037	3.39884	3.73973	3.61581	3.98906	3.39414	3.6663	3.73167	3.49132	3.79759	3.97561	3.82098	3.43772	3.80266	3.43822	3.53824	3.40609	3.47109	3.37223	3.59758	3.91741	3.68274	3.70017
CKMT2-AS1	5.74312	5.93339	6.05906	5.50442	5.67631	5.93478	6.11983	5.6273	6.68269	6.58397	5.54172	5.83466	5.5437	5.36458	6.32045	5.88447	5.75745	5.89515	5.54322	5.72284	5.52805	5.95884	6.0024	6.07474	6.23347	5.97828	6.22995	6.35779	5.78108	5.28951	6.46699	5.89434	6.44188	6.70156	6.06038	6.09607	5.6944	6.00089	5.62903	5.73684	5.64884	5.91077	5.84844	5.58224	5.94561	5.8497	6.43848	5.60401	5.76472
LINC00605	4.5605	4.4744	4.66946	4.70142	4.41524	4.79741	4.49266	4.8506	4.32459	4.42275	4.32764	4.48956	4.58104	4.4783	4.72962	4.44466	4.62701	4.49231	4.45637	4.7245	4.3599	4.39229	4.4045	4.37036	4.63317	4.43443	4.48905	4.45834	4.37513	5.48751	4.2676	4.45859	4.53127	4.46241	4.61884	4.22264	4.22421	4.35045	4.4179	4.56846	4.05179	4.64217	4.5721	4.48572	4.7794	4.40305	4.21284	4.51843	4.72654
CCDC18-AS1	7.66868	7.65181	7.95434	7.52342	8.07436	7.71932	8.86114	7.7009	8.52126	7.82352	7.37784	8.20956	7.69344	8.24047	7.78698	8.6137	8.12895	8.63733	8.43629	8.04273	7.9542	8.63758	7.8302	8.61881	8.31389	7.84415	9.00872	7.76407	8.36468	8.01691	8.58914	7.1514	7.72618	7.94042	8.33791	7.71782	8.4088	8.31902	8.55884	9.0947	8.95256	7.57296	7.59501	8.04624	7.4938	7.71584	8.17483	8.46884	8.06867
ZNF236-DT	4.06947	3.91634	3.85377	3.93721	3.97628	3.84518	3.88661	3.79236	4.00802	3.76411	3.97756	3.69908	3.67284	3.92022	3.97556	3.78043	4.24053	4.01707	3.74136	4.01485	3.92557	4.1555	4.00354	4.08223	3.36815	3.9014	3.78578	3.74684	3.68542	3.74247	3.69236	4.13946	3.67527	4.00802	3.93901	3.73115	3.94602	3.86536	4.14931	4.17729	3.73158	4.03705	3.8726	3.86219	3.95805	3.85968	3.82981	3.78382	4.01768
USP30-AS1	6.31541	6.25191	6.33975	6.19775	6.21751	7.20933	6.14198	6.84237	6.29359	6.34576	6.13632	6.08465	6.03418	6.16032	6.34849	6.31363	5.70045	6.51204	6.45533	6.7595	6.74061	6.75153	6.66277	6.48042	6.51233	6.37215	5.64346	6.55569	6.34726	6.45572	6.12205	6.14851	6.33269	6.67076	6.54196	6.33356	6.05136	6.61294	6.11448	6.96965	6.24895	6.68301	6.60065	6.00431	6.14025	6.29407	6.11159	6.38902	6.73213
CADM3-AS1	5.14731	5.77655	5.99706	5.3676	5.82567	5.27847	6.10911	5.21487	5.71168	5.67398	5.05086	5.89755	5.26416	5.16013	4.93263	5.55123	5.20023	5.8099	5.36849	5.83454	5.4341	5.85429	5.91017	5.00779	5.41051	6.07749	5.40748	5.18236	5.27953	5.23914	5.77777	4.7285	5.12663	4.98766	5.37422	4.99888	5.51764	4.78548	5.16453	5.41842	5.09328	5.73942	5.65118	6.92395	5.23179	5.55113	5.55144	5.35923	5.83885
RRN3P3	4.64273	4.29419	3.96494	4.47671	4.38978	4.48867	4.44857	4.46221	4.18617	4.56457	4.74248	4.33716	4.85079	4.63213	4.80003	4.28922	4.46229	4.66535	4.51826	4.50033	4.13172	4.23313	4.20315	4.11377	4.11898	4.91086	4.33046	4.42212	4.36642	4.6999	4.50449	4.28986	4.5524	4.66109	4.4754	4.53396	4.29839	3.99544	4.42674	4.73324	4.04818	4.04008	4.23304	4.96415	4.22673	4.58677	4.49369	4.2241	4.54515
LOC100132078	3.52144	3.28464	3.6883	3.74011	3.43834	3.34902	3.26367	3.15004	2.9969	3.2755	3.51121	3.32015	3.28433	3.30211	3.15904	3.45427	3.40613	3.63291	3.28825	3.72829	3.61509	3.4087	3.36845	3.388	3.13139	3.23376	3.22769	3.30899	3.13961	3.34509	3.18939	3.37551	3.21323	3.5288	3.38441	3.27123	3.51919	3.1903	3.53449	3.31179	3.11215	3.16376	3.56567	3.35263	3.34319	3.69005	3.2116	3.31726	3.75631
KRTAP4-9	3.90944	3.81097	3.92756	3.75558	3.67459	4.04436	3.84546	3.89537	3.87911	3.60002	4.0298	3.59084	3.94434	4.20758	4.00492	3.97637	3.85033	4.08428	3.60815	3.84096	3.76236	3.90289	4.06598	3.81485	3.80458	3.69164	3.66094	3.60349	3.78419	4.08344	3.48017	3.70806	3.64635	3.76435	3.69885	3.46953	3.73274	3.80114	3.7965	3.92589	3.49148	3.74096	3.91727	3.88385	3.67148	4.04632	3.44851	3.78587	3.96996
KRTAP4-7	2.52187	2.50689	2.5945	2.48192	2.69411	2.56414	2.37608	2.81848	2.41496	2.43519	2.59119	2.35648	2.64792	2.50622	2.69862	2.51654	2.64999	2.49844	2.58307	2.51143	2.64681	2.47423	2.64198	2.26762	2.45015	2.52932	2.51538	2.38526	2.72861	2.62481	2.3376	2.36661	2.5007	2.43488	2.39755	2.34866	2.32254	2.40189	2.62173	2.50286	2.36162	2.62364	2.50689	2.47274	2.4386	2.58737	2.44878	2.40029	2.55299
FILNC1	3.04582	2.88452	3.1348	2.81823	3.11001	3.42645	3.20216	3.57109	2.8079	3.09024	3.02399	3.02235	3.07618	3.01808	3.20043	3.71558	3.3482	3.38494	2.99045	2.99509	3.31176	3.10015	3.26822	3.00343	2.98338	3.26055	2.99677	3.10457	3.27755	3.04078	3.2458	3.03217	3.20065	3.04353	3.2673	2.99748	3.09915	3.43793	3.49845	3.90846	3.18401	3.16215	3.18999	3.28933	2.95227	3.39804	3.13275	3.00726	3.00613
MSC-AS1	5.19341	4.95556	5.5385	4.95994	4.94293	5.949	5.27259	4.99986	5.62601	5.00596	4.7759	4.92303	5.64381	5.10894	5.37756	4.5424	5.52218	4.89046	6.06855	5.27729	5.29806	4.16968	5.3575	5.22249	5.21661	4.78011	6.4647	5.25401	5.50859	5.05577	5.86049	5.48233	6.62939	4.82524	4.4872	4.8699	5.17609	5.71461	6.35664	5.0148	5.61882	5.98578	4.8862	5.77709	5.9489	4.81923	4.65765	6.00949	5.39351
LINC00240	4.22436	4.10047	4.14708	3.779	4.04743	4.1705	3.7545	3.72162	4.3589	4.13455	3.82113	3.73175	3.9156	3.82166	3.86439	3.80545	4.09622	4.06729	4.52376	4.34221	3.85032	4.51867	4.00491	4.32545	4.26938	4.16137	5.18744	3.98808	3.70699	4.08778	3.95591	3.63927	3.52987	4.694	4.36056	4.40719	3.81117	3.77002	4.01555	4.15853	3.52521	4.0312	4.06046	4.00594	3.84082	4.59364	4.49816	4.62718	4.36572
CD24	8.48901	8.29092	7.84895	9.11497	8.94186	9.18348	8.41513	9.34905	8.50724	9.38154	8.01852	8.44304	8.56748	8.72745	9.39425	8.83155	9.48118	9.44532	10.2848	9.09927	10.1733	8.91394	7.87163	9.93448	8.84903	9.48133	9.73786	8.71352	9.99143	8.79305	9.59725	9.28286	9.634	8.66783	9.01727	9.29101	8.44825	8.41329	8.47306	8.64783	9.49587	7.45461	8.55455	8.87	8.39426	9.30462	9.20938	10.3648	9.57355
LINC01119	5.85212	5.67631	6.30876	6.02785	6.20732	5.82402	6.01391	6.4002	5.72086	6.04192	6.2633	6.34049	5.9043	6.20152	6.43538	6.80428	5.87538	5.92404	5.468	5.56497	5.65457	6.20802	5.78305	5.2869	6.0101	5.45715	5.77715	5.60803	5.81476	5.99188	5.37698	5.54814	5.87448	5.74412	6.1504	5.52287	5.91176	5.54377	6.07867	5.74269	5.93654	6.16665	6.16012	6.09683	6.25314	6.18151	5.74916	5.47432	5.59251
C17orf99	3.48616	3.67868	3.30045	3.96613	3.53304	3.84775	3.45214	3.70697	3.4349	3.65247	3.67898	3.64903	3.75892	3.64458	3.37159	3.89458	3.57493	3.70859	3.43616	3.53864	3.6305	3.84825	3.61424	3.56485	3.5545	3.53993	3.95705	3.90238	3.99257	3.58343	3.36589	3.81571	3.67178	3.73035	4.03819	3.5638	3.46066	3.37966	3.39314	3.59424	3.67881	4.82598	3.46486	3.58357	3.4032	3.60886	3.76511	3.45027	3.53487
TEX36-AS1	3.02635	2.7572	2.82223	3.06104	3.00298	3.02419	2.82353	2.93323	3.00663	2.83661	3.07037	3.03608	3.06496	3.07662	2.87232	2.92583	2.91211	3.10661	2.78886	3.09144	2.90354	2.84986	3.23651	2.94754	2.86258	3.06742	2.88411	3.01344	2.90573	2.96756	2.70034	2.88225	2.959	2.996	2.96558	2.99835	2.93921	2.81647	2.91207	3.27123	2.84867	2.94297	2.96878	3.19429	2.77561	3.04206	2.57823	2.79804	3.09703
EPOP	6.62418	6.7562	6.86756	7.18498	6.95024	6.66884	6.63887	6.79244	6.76442	6.66884	6.96021	6.65576	6.80703	7.28501	6.76672	6.89196	6.52038	6.97776	6.75472	6.4386	6.45236	6.89871	6.39665	6.57449	6.71799	6.59934	6.62501	6.69441	6.64644	7.69321	6.65741	6.80273	6.54772	6.92845	7.04379	6.47313	6.45844	6.89621	6.47338	6.77341	6.51306	6.38644	6.85301	7.3726	6.92991	6.81288	6.63393	6.87579	6.47739
RAMP2-AS1	4.39508	4.66399	4.23765	3.85449	4.30436	4.27897	4.51993	4.16967	4.58145	4.50874	4.24188	4.29536	4.41686	4.08046	4.02059	4.68437	4.44211	4.45623	4.2962	4.60152	4.46152	4.85833	4.47079	3.99169	3.8511	5.11715	4.10698	4.31912	4.5855	4.39153	4.19063	4.24	4.65922	4.47787	4.47866	4.57491	3.87109	4.72826	4.75005	4.27647	4.18961	4.46222	4.32407	4.22582	4.31138	4.44632	4.6014	4.09237	4.28148
CDH4	5.76661	5.80978	5.21131	4.8382	5.55558	5.22834	5.33235	5.44432	5.05003	5.22702	5.07699	5.79457	5.50102	5.16174	5.63374	5.22118	5.08668	5.29674	5.32076	5.58697	5.14864	5.32657	5.44646	5.07355	5.18318	4.98201	5.36794	5.54732	5.01317	5.40671	4.93957	5.97511	5.61018	5.22372	4.93867	4.89677	5.4539	5.08423	5.40691	4.96807	5.63834	5.66432	4.96903	5.36555	5.20032	4.92073	5.9111	5.27811	5.54572
FRAT1	7.80109	8.38305	8.80446	7.97825	8.40193	8.51007	8.39697	8.65336	8.29956	8.73606	8.30147	8.14054	7.68835	7.99147	8.4591	8.25922	8.46056	8.33331	8.70678	8.34149	8.37804	8.78161	9.02683	9.24253	8.3539	8.30147	8.71045	8.14347	8.33981	7.25105	8.53366	8.07562	8.55085	8.95617	8.35983	8.34153	8.54042	8.4535	8.4625	9.52131	8.34477	8.05099	8.57221	7.44497	8.31573	7.66481	8.76224	8.69912	8.33138
LOC100268168	3.81758	3.72879	3.68375	3.63457	3.89367	3.65869	3.62894	3.66705	3.8643	3.54444	3.87846	3.6129	4.23018	3.64621	3.86176	3.4522	3.57987	3.7892	3.12823	3.63582	3.49436	3.87216	3.66744	3.33103	3.41714	3.83286	3.48192	3.40518	3.47666	3.44768	3.43588	3.33635	3.84292	3.73646	3.32634	3.54904	3.49601	3.80681	3.80469	3.74	3.50049	3.51745	3.47658	3.38721	3.76928	3.92537	3.47199	3.18902	3.70111
LINC00653	5.06819	4.84849	5.03753	5.05029	5.32871	4.75287	5.48281	5.55522	5.33761	5.14762	5.29976	5.33524	5.30759	5.27201	5.98267	5.79337	5.04126	5.75451	4.66009	5.38933	5.10154	5.54248	5.41566	5.47997	5.32308	5.09663	6.01196	5.11075	5.12668	4.94591	5.23203	5.01934	5.16253	5.2114	5.44474	4.82584	5.64402	5.22061	5.11606	5.12943	5.10726	4.83338	5.24589	4.90417	5.48793	5.03796	4.87411	4.69737	5.44434
LINC00899	5.56812	5.71454	6.0106	5.40963	5.47505	6.0367	6.51496	5.44438	6.62549	6.32555	5.83263	6.07217	5.7126	5.81231	5.6377	6.25916	5.71402	5.93548	5.44917	6.06678	5.90782	5.55301	6.00087	5.82458	6.44474	6.01069	6.21382	5.92992	5.9146	5.32228	5.99843	5.79989	5.9534	6.14789	6.28846	5.87065	6.18223	5.96528	5.98043	5.53888	5.6163	5.71691	5.69954	5.5277	5.79733	5.56251	5.84948	5.48344	6.11483
LOC100272217	2.9689	3.00245	2.70179	3.21529	2.98959	2.93345	2.92107	3.61135	3.10897	3.04844	2.81043	3.06422	2.73924	2.99388	2.81158	2.95094	2.77627	3.46917	3.31644	3.05645	2.9389	3.12057	3.324	2.88729	3.08595	3.40491	3.00933	2.88013	2.88562	2.7981	2.76082	2.96871	3.34174	2.95075	3.22255	3.17209	2.8541	2.88663	3.0618	2.97017	2.94506	2.85997	3.07233	3.03768	3.28278	3.1143	3.18014	3.33148	3.06433
EML2-AS1	4.9977	5.42285	5.29675	5.26434	5.12205	5.84023	5.32352	5.42939	5.37675	5.92275	5.48029	5.23811	5.25344	6.06076	5.37721	5.36524	5.42777	5.41376	5.83955	5.70899	5.38944	5.70033	5.70032	5.40818	5.16288	5.03759	5.79292	5.28206	5.2894	5.54033	5.47561	5.44513	5.37128	5.47618	5.26147	5.54829	5.8558	5.54871	5.58743	5.79028	5.13724	5.3112	5.55869	5.04818	5.63747	5.59036	5.49538	6.13964	5.98774
SH3RF3-AS1	5.05976	4.58225	3.9485	5.14006	4.27932	4.58053	4.50418	4.56702	4.11782	4.21589	4.46086	4.50201	3.96394	4.88773	4.43228	3.86356	4.44271	4.4338	3.86511	4.11779	4.1406	4.53644	3.79509	4.03144	4.52552	4.13922	4.10388	4.40499	3.96142	5.06458	4.60291	3.78289	4.17205	4.32448	4.10433	4.02061	4.40638	3.892	4.22393	3.57979	4.50374	4.27249	3.86751	4.84002	4.82722	4.63863	3.7114	4.13914	4.24504
TIPARP-AS1	3.86385	4.03563	3.97198	3.69794	3.80065	3.79524	3.80505	4.0043	3.4868	3.90979	3.97313	3.68989	3.7728	3.97116	3.89149	3.84059	4.01071	4.00009	3.54828	3.93844	4.03509	3.73834	3.80044	3.64156	3.80912	4.36165	3.98756	3.89462	3.52462	3.90228	3.8121	3.7713	3.83379	3.74771	3.95206	3.66786	3.74201	4.0775	3.90878	4.02075	3.59636	3.31508	3.98008	3.78802	3.91393	3.52153	3.81896	3.62168	3.96124
LOC100287387	4.47478	4.08698	4.5015	4.27234	4.4203	4.25248	4.7951	4.57727	4.81397	4.35912	4.22975	4.82546	4.81272	4.26984	4.24375	4.33438	4.14498	4.50599	4.05981	4.63258	4.26824	4.65652	4.06979	4.42875	5.00451	4.05283	4.38737	4.50797	4.02005	4.11436	4.44692	4.39574	4.6209	4.80388	4.24023	3.98374	4.24119	4.68701	4.70497	4.08256	4.38114	4.79525	4.80744	4.21993	4.78574	4.51914	4.70053	4.14865	4.68745
SMKR1	5.52586	5.73454	4.72765	4.94002	5.45946	5.10878	6.09541	4.97532	5.48271	6.51893	5.72937	5.33481	4.86979	6.16061	5.53617	5.15026	5.62386	4.92856	6.70103	6.49164	6.33163	4.93833	5.38621	5.91385	4.91615	6.23138	6.54717	5.02985	5.81874	5.23481	6.0524	5.60943	4.8852	4.98292	5.22814	5.67177	5.72058	5.32505	4.82741	4.47312	6.42464	6.06203	5.87987	5.08458	5.65518	6.79052	6.93443	6.84962	6.26805
LOXL1-AS1	4.7329	4.63568	4.90214	4.00861	4.42585	4.10785	4.90739	4.73964	4.68624	4.77785	4.70279	4.75813	4.35399	4.12092	4.62072	4.61819	5.08884	4.30491	4.74067	4.61204	5.02682	4.50276	4.5519	4.70432	5.17482	3.81357	5.3112	4.0382	4.67799	4.01572	4.92891	4.63144	4.79224	4.12681	3.98155	4.37706	4.98697	4.77798	4.12272	4.36038	4.95011	5.46032	5.25528	5.14665	5.31752	3.93565	4.56155	4.85098	4.7305
LINC00630	3.18026	2.94498	2.65855	2.84225	2.77982	3.01703	2.94011	3.31298	2.88546	2.98946	2.91335	3.2968	2.83288	3.26299	3.16911	2.91934	2.81688	3.25221	2.8642	2.83405	2.87377	3.15377	2.87869	2.81599	2.86148	2.94531	3.05244	2.93124	2.87719	2.86277	2.91429	2.5862	3.05631	3.03486	2.71547	2.8642	2.99363	2.8446	2.97935	2.68825	2.84846	3.21603	2.93245	3.13468	2.931	2.93104	2.96635	2.8073	2.99217
LOC100287896	6.27678	5.78377	6.78517	6.09849	5.86157	6.80864	6.3795	6.84042	6.89772	6.9336	6.48469	5.88061	6.18166	5.51587	6.50452	6.50665	6.69193	6.37444	6.78332	6.48881	6.82807	6.52353	6.68084	7.3112	6.77189	7.15206	6.97627	6.22585	6.6524	5.66352	6.43939	5.90609	6.77732	6.79055	5.8861	6.63879	6.57705	7.05461	6.85131	6.98765	6.65069	6.72952	6.65072	5.2166	6.32497	6.31788	6.91491	6.74739	6.42937
SLC9A3-AS1	7.51736	6.52554	6.36618	6.77806	6.87691	6.8383	7.43953	6.57485	7.51945	6.2756	6.23058	6.72312	6.97437	6.67409	6.44838	7.22789	7.32228	6.40394	6.57252	7.42239	6.35439	6.71907	6.68306	6.54858	6.89184	6.61633	7.21202	6.44136	7.32962	6.73626	6.93494	6.6611	7.16462	7.06865	7.1435	6.55843	6.57513	6.71596	7.13239	6.62966	7.13441	6.35813	6.26231	6.79226	6.06665	6.41974	7.07438	6.68768	7.45851
ERVMER34-1	5.83594	6.09657	5.71425	5.24749	5.62811	5.75317	5.97276	5.48595	5.78987	5.58761	5.05821	5.7505	5.76981	5.35366	5.39517	5.6881	5.59637	6.00215	5.27028	5.94292	5.92486	5.44968	5.66709	5.53897	5.53168	5.98096	5.9877	5.7523	5.52751	5.79206	5.51962	5.67863	5.28225	5.46952	5.58781	6.65274	6.13375	5.69692	5.324	5.23743	5.01743	5.55154	5.70143	5.06753	5.62448	5.08924	5.46057	5.27341	6.04359
IL10RB-DT	6.69314	6.84124	5.96592	6.20917	6.10661	6.6807	5.67132	6.16355	6.60468	5.58686	6.00716	6.20341	5.92169	6.41833	5.05331	5.97257	6.51659	6.24873	6.95007	6.16642	6.39741	5.73559	6.16981	5.59663	5.6849	6.03669	5.43285	6.05817	6.24441	5.95648	6.37159	5.73612	6.55744	5.95825	6.09898	6.58984	5.93344	6.1044	5.78989	6.76147	6.26241	6.12133	6.39602	6.29293	6.06617	6.06619	6.09445	6.90112	6.07637
GS1-124K5.4	7.14376	7.40924	8.29479	7.39794	7.20233	7.69745	7.54244	8.16296	8.01047	7.53015	7.17679	7.87285	7.44705	7.21048	6.94583	7.88757	7.75554	7.46791	7.52152	7.97552	7.60419	7.3799	7.5558	7.43089	7.49836	7.92484	7.96191	7.45305	7.64179	6.6868	7.55085	7.10422	7.79382	8.00273	7.84175	7.93016	7.64772	8.2466	7.44872	8.23684	8.03179	7.16355	8.10509	6.82611	7.54255	7.3141	7.42533	7.43296	7.68002
LOC100289230	5.7976	5.23031	5.21168	5.1405	5.67904	5.18124	5.05896	5.36081	5.22797	5.65657	5.47376	6.07001	5.53805	5.68872	5.10854	5.85262	5.29098	5.57449	5.05639	4.90265	4.91241	6.33494	5.17497	5.14277	5.42208	5.51855	4.46548	5.31687	5.35761	5.10556	5.25336	5.37688	5.18551	5.00987	5.82648	4.96199	5.43279	5.4591	4.85362	5.13754	5.57704	5.31558	5.33142	5.27098	5.32975	5.55504	5.21484	4.97909	4.78932
ZNF587B	7.63528	7.84375	6.6209	7.46486	7.31937	7.04646	7.38569	7.42521	7.06203	7.13967	7.21245	7.87196	8.10611	7.61524	7.37556	7.47445	7.11634	7.17693	7.3394	6.71258	7.00658	7.79197	7.23214	6.6779	7.1776	6.97644	7.06637	7.22853	7.15828	7.2112	7.40791	7.63105	7.48785	6.77182	6.98417	7.3453	7.50119	7.1283	6.81262	7.28715	7.323	7.32293	7.22055	7.78346	7.19776	7.88021	7.21575	7.22688	6.75352
BABAM2-AS1	8.92125	6.13995	7.68614	8.05157	7.51039	7.67208	6.79631	7.33624	7.24057	7.30931	6.83912	6.38898	6.23609	8.37189	5.25767	7.96917	7.02107	6.89199	7.57729	5.64858	6.35236	7.67462	5.88264	5.90121	6.49578	8.19637	5.37021	7.08106	6.72388	8.85734	6.29604	5.73935	4.71938	6.80836	8.60506	4.84389	5.99709	7.29752	6.49733	6.61075	6.82803	6.70448	7.22987	7.8032	7.32113	6.96103	7.30721	7.67468	5.76709
PITPNA-AS1	7.30734	7.6806	7.99652	7.09089	7.04088	7.84526	7.43788	7.74248	8.15543	7.89875	7.23106	7.45129	7.40843	7.26667	7.0322	7.59633	7.79171	7.44569	7.40404	7.61792	7.76736	7.63623	7.90705	7.92666	7.57873	7.72719	8.37911	7.81221	7.70393	6.82191	7.46947	7.76678	8.11996	7.75036	7.5789	8.00384	7.7165	8.24361	7.70887	8.03153	7.89106	7.62645	7.8309	6.42758	7.86091	7.3623	7.66565	7.3866	7.61405
LOC100422212	3.58854	3.83412	3.38623	3.51067	3.51181	3.45535	3.95617	3.57947	3.82819	3.43913	3.60435	3.46711	3.90117	3.77275	3.51101	3.77743	3.64128	3.54647	3.22365	3.30951	3.43105	3.52447	3.95174	3.457	3.37085	3.86312	3.46348	3.64628	3.3564	3.56412	3.35279	3.80621	3.78087	3.43535	3.72113	3.6866	3.53892	3.52914	3.65391	3.26472	3.11216	3.81497	3.76734	3.71346	3.31139	3.86492	3.74916	3.1555	3.29614
LINC00276	2.6785	2.9485	2.88116	2.95208	2.89263	2.87865	2.52953	2.66059	2.717	2.74777	2.74253	2.56367	2.53887	2.79426	2.89105	2.94425	2.94907	2.67428	2.68199	2.75134	2.70086	3.01329	2.55694	2.65123	2.66204	3.138	2.7762	2.98332	2.67228	2.68306	2.79282	2.71819	2.72469	2.62317	2.95481	2.64024	2.78987	2.67303	2.57672	2.63942	2.64343	2.65861	2.86292	2.73433	2.61282	2.63736	2.84008	2.66088	2.5948
THAP9-AS1	7.96458	9.53311	9.29619	9.06663	9.7151	8.41731	9.17924	9.33696	8.76431	9.43681	9.76558	9.58227	9.74954	9.65436	9.54511	8.36734	9.08055	9.19007	8.9919	9.33407	8.9918	8.8707	8.76931	9.26292	9.48624	9.45369	8.81146	9.55914	8.46948	8.97455	9.31629	9.62747	9.41729	9.00911	9.00282	9.06853	9.40522	8.34367	10.001	9.3268	8.93925	9.09224	8.31878	8.49524	9.33722	9.6848	9.42698	8.95032	9.37275
MIR3682	6.39175	6.25721	5.90323	6.80044	6.72806	6.19739	5.96724	5.61412	5.84724	5.48666	6.15956	5.59881	6.37051	7.31347	5.68104	5.4592	5.53097	6.40075	6.70923	5.89526	5.42171	5.67802	5.07645	5.96679	5.83949	6.28184	6.859	5.93137	5.81832	7.0843	6.27903	6.13636	5.67533	5.98965	6.12125	5.91774	5.84488	6.02893	5.68403	6.47899	6.23518	6.0854	6.14923	7.54115	6.31374	6.98145	5.86742	6.64633	5.99848
EDNRB-AS1	4.00253	4.2016	4.13571	4.03688	3.84541	4.1787	3.72184	3.9635	3.86615	3.9292	4.00874	4.04731	4.03618	3.72823	3.5787	4.28172	4.2259	3.99426	4.28817	3.9311	3.82791	4.20182	3.83783	4.17052	4.06332	4.13533	3.78309	4.00898	3.7774	3.88269	3.93916	3.96061	3.90687	4.228	4.04431	3.85161	3.58981	3.83174	3.94974	4.50756	3.86122	3.63832	3.99771	4.09719	3.64345	4.06728	3.96821	4.45476	3.89633
RBM26-AS1	4.80627	4.86981	4.61097	4.65989	4.42465	4.78129	4.82171	4.87704	4.71025	5.3572	4.62059	5.42955	4.69855	5.1955	4.8412	5.07896	4.5596	5.09637	4.5948	4.59267	4.51187	4.93353	4.84256	4.89575	6.51746	5.11322	5.67263	5.27655	5.70252	4.98804	4.85856	5.30088	4.90788	5.98186	5.08007	5.11511	5.07509	6.08318	4.66961	4.87042	4.68288	4.98493	5.66316	4.74978	4.90466	4.8554	4.78064	4.72485	4.76044
LOC100505549	6.28451	6.21157	6.18155	5.83984	5.85428	6.52426	6.19919	5.38666	6.50537	5.89799	5.74093	5.73939	6.01506	5.74222	6.00984	5.6232	6.32541	5.87804	6.38875	6.23336	6.23121	5.92574	6.34942	6.42432	6.19413	6.45024	6.44409	6.25804	6.22673	6.3531	6.13469	6.02365	6.38672	6.13951	6.46214	6.43337	6.24559	5.86585	5.9351	6.31771	5.68519	5.95777	5.60523	5.47904	6.2334	5.70022	5.92423	6.33402	6.20994
GAPLINC	7.1466	6.78282	7.14201	6.6622	6.43698	7.2422	6.55236	7.31172	7.09721	6.14349	6.08269	6.36408	6.33032	6.78947	6.74006	7.10519	6.66938	6.73318	6.43238	6.50898	7.38053	6.27789	6.62957	6.73222	6.70466	6.78604	6.75192	6.81534	6.92695	7.38802	6.42477	6.66521	6.70469	6.27591	7.15847	6.6485	6.51551	6.70062	7.10519	8.48793	6.29004	6.47076	6.28216	6.77325	6.74318	6.63295	6.24769	6.39926	6.51323
LINC01133	4.04181	3.7564	3.84808	3.83492	4.52562	3.73285	3.99542	3.99726	3.75089	3.72288	3.61593	3.83413	3.97982	3.5732	3.70785	3.78589	4.0196	3.89258	3.46493	3.82054	4.00642	3.79485	3.69623	3.87454	4.60422	3.79454	5.09744	4.17988	4.11399	3.98043	3.70021	4.21496	3.98168	3.35008	3.64923	3.65808	3.62696	4.02275	4.32947	3.57882	4.21007	3.89849	3.75675	3.75271	4.38479	4.00177	4.2271	3.64572	3.74042
SH3BP5-AS1	6.05636	6.08573	6.96487	6.43905	6.54924	6.19909	6.67731	6.21778	6.14842	6.27344	6.01153	5.82639	6.05264	6.21479	5.86729	6.64252	5.5742	6.19436	6.5692	6.29387	6.32969	6.76964	5.80875	6.46809	6.11552	6.57813	6.36405	6.20805	6.19022	5.82835	6.29757	6.15995	6.43002	6.65511	6.40982	5.69396	5.75832	6.29984	6.45017	6.7843	6.56566	5.51892	6.40763	6.26318	5.95913	6.08857	6.04022	6.58684	6.42111
LINC01094	6.62233	6.19041	5.31098	6.30525	5.96697	6.94884	5.82951	6.51709	5.97533	6.50523	6.21826	5.02475	5.29371	6.59317	6.3021	6.78471	7.14286	6.75942	6.68602	6.31318	7.04438	6.10341	6.58921	7.55584	6.53394	5.97145	5.27866	6.62461	6.50546	6.51369	6.39672	6.09295	7.14951	6.69982	6.1289	5.93933	6.13692	6.47275	5.98374	8.76311	6.72419	6.30093	6.62638	6.05846	6.26023	5.51261	5.81137	6.72064	6.33631
LINC01592	3.17098	3.03425	2.91965	3.20065	3.01329	2.88016	3.05139	2.75116	2.88548	3.01657	3.14733	2.76899	2.88805	2.97474	3.05217	3.10204	2.99955	3.4104	2.90257	2.84325	2.86156	3.13482	2.88001	2.96843	3.02692	3.13532	3.11126	2.96228	2.80605	2.9807	2.90559	3.16946	3.07568	3.01627	2.89667	2.91226	2.91807	2.9969	3.23971	2.96228	2.88045	2.97067	3.00324	3.13107	3.07132	3.12496	3.16747	2.88918	2.85522
SPATA1	4.57467	4.9388	4.27373	4.81444	4.79785	4.59086	4.41465	4.65427	4.65305	5.05338	4.60012	4.36307	4.71928	4.86497	4.48106	5.00864	4.47721	4.73372	4.33787	5.23076	4.98113	5.09064	4.44784	4.71054	4.5726	5.13712	4.38395	4.75046	4.47615	4.45511	4.99926	4.38583	4.81764	4.71587	4.58217	4.73974	4.49659	5.14173	4.35098	5.28373	4.37026	4.47759	4.74251	4.62701	4.78786	5.00321	5.0093	4.33452	5.28234
ITGB2-AS1	6.44273	7.04468	6.30104	6.72001	6.94435	6.36372	6.48403	6.36114	7.09144	6.35597	6.7029	6.88125	6.2083	6.29197	6.48275	6.77219	6.90104	7.07971	6.0208	6.17015	6.86655	6.39661	6.13577	6.25352	6.41861	6.25258	6.91845	6.22319	6.27403	6.96682	6.92969	5.89969	6.40452	6.22815	6.87172	6.30558	6.51917	6.42515	6.77602	6.37891	6.7799	6.29767	6.14157	6.23062	6.38831	6.09331	6.44883	6.0886	6.32274
LOC100505782	2.7023	2.9797	3.03278	2.96954	3.01733	2.9487	2.74241	3.06854	2.66869	2.77587	3.02057	2.91255	2.82807	2.9595	2.53656	2.9124	2.97523	3.07353	3.15241	2.73101	2.72664	2.86862	2.76597	2.6914	2.93987	3.36004	3.20983	2.95862	3.09856	3.09346	2.71864	2.89039	2.89737	2.87737	3.10206	2.66039	2.80475	2.96018	3.10925	2.83737	2.83916	2.76434	2.74477	2.96155	2.77508	2.93113	3.10343	3.16062	2.69525
LINC02148	2.89834	2.60207	3.7085	2.99025	3.24985	3.0675	2.88623	2.95081	3.04084	3.28761	3.10141	2.74192	3.01783	3.04608	2.658	3.09731	2.81718	2.92351	2.68807	3.09169	3.08012	3.16734	2.89106	2.72609	3.0578	2.77733	2.98619	3.17086	3.0105	3.08592	3.14672	3.12508	3.15128	3.04501	3.01142	2.84008	2.81878	2.89713	2.80024	3.29914	3.28472	3.41505	3.29185	3.0665	3.33092	2.83259	2.93189	2.71222	3.00751
PROX1-AS1	3.14485	3.49301	2.89563	2.99082	3.26852	2.8973	3.04228	3.00373	2.68221	2.86122	3.03486	2.97329	3.12975	3.21671	3.16061	3.13138	2.9496	3.35397	3.00157	3.08263	3.02793	3.04156	3.0382	3.36744	2.90705	3.07284	3.00302	3.33375	3.23439	3.43236	3.15575	3.20851	3.0281	3.2796	3.03536	3.12007	2.7627	3.28773	3.34825	3.04936	3.19993	3.06613	3.10499	3.10413	3.11961	3.01136	3.11767	2.9762	3.11581
LOC100505851	4.20829	3.82605	4.78645	4.54011	4.63257	4.19687	3.70559	3.91579	4.51686	4.48347	3.88342	3.84553	4.33014	4.08954	4.25941	3.69967	3.9374	4.12441	3.96324	4.06364	4.20301	5.80114	4.30069	5.00895	4.19111	4.18658	3.77252	4.13943	3.8099	4.58711	3.70026	3.61404	3.86606	4.88679	4.85208	3.95978	3.89655	4.02329	3.6936	4.82282	4.10346	3.85543	4.01982	4.01062	3.79562	4.83964	4.31123	3.99802	4.05688
LINC00920	6.00826	5.36634	5.21961	5.39608	5.70722	5.3524	5.0954	5.47049	5.80513	5.44466	5.60284	5.69928	5.53122	5.18182	5.3095	5.5576	5.72212	5.27026	5.26505	5.43863	5.86605	5.26366	5.678	5.07936	5.41556	5.65824	5.63935	5.43422	5.09136	5.29788	5.33275	5.2274	5.23899	5.43932	5.31081	5.32226	5.02074	5.59972	5.72125	5.35664	5.68522	5.43788	5.63637	5.33542	5.10432	5.40534	5.32432	5.26712	5.47182
LINC01088	5.67034	4.57161	7.23398	6.63448	6.04993	6.07013	5.8891	5.35486	5.4758	5.95336	6.37006	6.04703	4.67981	4.4396	4.67469	5.6539	5.49504	5.79023	5.31305	4.32227	4.55381	6.50023	5.38541	5.47206	5.38176	5.27883	4.55444	5.29178	6.19647	4.53379	5.71918	3.65207	5.09441	7.22311	5.67196	5.09247	4.72426	6.27441	5.01213	5.31224	5.00885	5.70749	5.84521	6.51379	5.1714	6.70879	5.17119	5.3147	4.61309
SLIT2-IT1	3.24283	2.97978	2.91172	3.03404	3.33865	3.05167	3.20246	3.58192	3.39597	2.89036	3.19799	3.3278	3.28307	3.182	3.29116	2.80727	3.12337	3.34249	3.00078	3.46922	3.03246	2.88817	2.9573	2.78272	3.30108	2.9026	2.59528	3.22752	3.00331	3.3482	2.99826	3.21657	3.24906	3.03471	2.87507	2.80454	2.865	3.03829	3.01257	3.32032	3.0161	3.06054	3.09438	3.37267	3.21563	3.1286	2.96633	2.94392	3.52229
LOC100505912	3.72229	4.20806	3.73659	3.92507	3.6191	3.82912	3.93744	3.79539	3.74223	3.56463	3.83687	4.11808	3.50389	3.92255	4.09634	4.09629	3.9057	3.34104	3.80046	4.10755	3.65892	3.92007	3.72909	3.7659	3.76847	4.21388	3.92572	4.17861	3.98972	3.81079	3.86633	3.92864	3.92385	4.06567	4.16802	3.78364	3.70838	4.06343	4.12687	3.65039	4.15651	3.61096	3.87039	3.78311	3.57794	4.01675	4.09576	3.82085	4.168
LINC00645	2.667	2.35622	2.50143	2.61359	2.73324	2.72085	2.59927	2.59553	2.58945	2.74131	2.86549	2.59857	2.37976	2.50338	2.90174	2.65749	2.42155	2.73552	2.60032	2.70389	2.64763	2.54812	2.75319	2.63923	2.54392	2.58632	2.554	2.18554	2.48415	2.46056	2.36195	2.67875	2.47289	2.50765	2.37868	2.66298	2.45383	2.40514	2.67356	2.61828	2.47374	2.90137	2.5921	2.48905	2.6423	2.6175	2.30523	2.60744	2.74026
ENO1-AS1	4.73093	4.56303	4.91563	4.2631	4.97971	4.39501	4.7461	5.80885	4.84175	4.86968	4.71854	5.52112	4.92868	4.73468	4.78371	5.11891	4.53737	4.92801	4.39737	4.95291	4.58599	5.4325	4.58092	4.4017	5.32093	4.94938	4.98672	4.8567	4.46331	4.87616	5.31759	4.84363	4.62439	4.74848	5.29393	3.59843	5.50446	4.84575	4.63019	4.88986	5.2746	4.38681	4.88025	4.73054	5.11823	5.26857	4.90612	4.43998	4.99471
SMIM31	3.84906	4.04407	3.36089	3.44158	3.37701	3.79973	4.50178	3.76597	3.5883	5.56924	3.89035	3.62496	3.27788	5.75133	4.45211	3.76538	4.21173	3.099	5.31252	5.56074	5.48921	3.59096	3.87076	4.4312	3.5329	4.94497	7.7987	4.14666	4.12719	4.22414	4.48048	4.69861	3.57833	3.58505	3.1184	3.3687	4.18626	3.80299	3.43715	3.78521	5.34755	5.09656	4.40599	3.97279	3.62191	5.90828	6.36941	5.41106	5.45904
APELA	2.95695	2.94296	3.00198	3.01341	2.92502	2.96328	2.87407	2.97558	3.64365	2.602	3.14108	2.82081	3.0903	2.7514	2.97068	2.66853	2.96924	2.87411	2.91806	2.77527	2.89492	2.91911	3.08038	2.80987	2.83301	3.23278	3.69933	2.83569	2.81528	2.9471	2.67194	2.71899	2.6191	3.15223	2.80567	2.76579	2.80064	2.84673	3.07548	3.67231	2.69925	2.83087	2.70432	2.91806	2.90235	2.96804	2.62427	2.96747	2.78284
LINC02606	5.79302	4.96072	4.95685	5.28638	5.37084	5.25763	5.68251	6.06647	5.90916	5.58909	5.61461	5.3302	5.09351	4.99045	5.65414	5.71256	5.69177	5.46371	5.33462	5.58439	5.4664	5.2251	5.81837	5.28811	5.53056	5.63382	5.69409	5.45876	5.58895	5.20001	5.81085	5.36257	5.72042	5.21398	5.42339	5.43212	5.79602	5.4024	5.2467	5.14746	5.46642	5.92712	5.52653	4.91434	5.48329	5.01209	5.36351	5.33671	5.55896
GAS5-AS1	4.0671	4.85717	4.80018	4.54243	4.53785	4.71473	4.64546	4.64407	4.49291	4.62227	4.34747	4.67955	4.61013	4.48045	4.49133	4.78054	4.48658	4.69995	4.78045	4.4854	4.51387	4.79682	4.45411	4.67545	5.10888	4.57527	4.63619	4.21209	4.62297	4.44076	4.72349	4.4249	4.55128	4.69842	4.70766	4.75974	4.591	4.62576	5.21461	4.79235	4.79838	4.37958	4.67617	4.47153	4.42778	4.75452	4.80621	4.79758	4.48683
TAF1A-AS1	5.41327	5.58989	5.11096	4.8912	5.47356	5.67676	5.65552	6.40533	6.1059	6.00796	5.24849	5.39363	5.13452	5.21259	5.53532	5.96731	5.93689	5.924	5.47544	5.5085	6.04214	5.30839	5.84088	5.53285	5.26193	5.32968	5.89782	5.36552	5.37964	4.66895	6.03635	4.9011	5.43619	5.24633	4.85045	5.33902	5.92506	5.6291	5.52244	6.02798	6.1012	5.90725	5.63226	5.10215	5.7672	5.59246	5.61851	5.56649	5.5486
MIR210HG	5.46385	5.6882	6.42499	5.93959	5.87993	5.91515	6.30462	6.07222	6.033	6.30324	6.33758	5.82465	6.277	5.33648	6.3021	6.423	5.95438	6.18707	5.71555	6.07248	6.04146	6.55257	6.10937	6.31628	5.90464	6.0928	6.32383	6.13562	5.92693	5.4804	6.01208	5.79173	6.3085	6.23634	6.21095	5.88045	6.15128	6.57995	6.54547	6.44233	6.25255	5.87106	6.0626	5.36301	5.86877	5.4251	6.51811	5.80078	6.03695
LINC01093	4.24443	5.06149	4.20929	5.19219	4.72301	5.21147	3.95465	4.27896	3.81495	4.13566	4.71111	4.02577	4.07988	5.41766	3.68432	3.9246	3.93706	4.32425	3.99283	4.80097	4.38315	4.62558	4.81269	3.91944	4.26361	4.31577	3.38875	3.89985	3.74279	5.36528	3.78613	4.07919	4.09583	4.87316	4.54944	4.21313	4.38932	4.01646	3.93635	3.63421	3.97842	5.42047	5.87209	4.55467	4.37772	4.11717	4.8565	4.02212	4.74321
KRBOX1	7.01441	6.75862	6.78826	6.67777	6.62485	5.58842	6.98898	7.71794	6.95028	6.73254	7.01948	7.35184	6.56905	7.41895	6.69556	7.0901	6.52979	6.91028	6.77574	6.57047	6.71389	7.2941	6.70076	5.59569	7.09327	6.98843	7.36093	6.70574	6.24462	5.65778	7.09324	6.95606	7.23903	7.20271	6.83507	6.53276	7.87582	6.79567	7.00745	6.47265	6.52792	7.54564	7.4281	7.17551	6.86017	7.58964	7.12595	6.87907	6.57495
LINC02492	3.16168	3.09292	3.12178	3.23636	2.92633	3.06677	2.96224	3.3894	2.81139	2.85199	3.15796	2.97842	3.06324	3.29532	3.28283	2.81664	3.11525	3.24323	2.82939	3.05028	3.08104	3.04019	3.13029	2.96315	2.90536	3.5499	3.42902	3.10354	3.04879	2.91848	2.92309	2.92639	2.83849	3.23015	2.93845	3.16793	3.00816	2.79454	3.03089	3.00565	2.92835	3.47386	2.88081	2.98417	3.12462	3.07131	3.34769	2.82657	3.12346
LOC100506289	4.98102	4.98197	4.50612	4.36828	4.45696	4.97851	4.41759	4.67676	4.4262	4.60547	4.28846	4.48315	4.44011	4.44768	4.36151	4.52632	4.5557	4.22311	4.46714	4.46321	4.77085	4.40493	4.78408	4.37878	4.29148	4.64623	4.62367	4.36926	4.82526	4.80626	4.53752	4.35679	4.68701	4.487	4.53661	4.78039	4.32454	4.72994	4.46226	4.59426	4.61649	5.6288	4.86157	4.15355	4.43187	4.34632	5.25148	4.50393	4.43317
HOTAIRM1	6.6005	5.94812	5.97098	6.00116	6.22406	6.01657	6.3745	6.27507	6.60243	6.19785	6.59042	7.0502	6.38362	6.25687	6.35326	6.97098	7.22705	7.18254	5.48157	6.284	6.12622	6.28795	6.83171	5.85929	7.00226	5.75763	5.83252	6.12523	6.27532	6.30948	6.18648	6.36498	6.25133	6.2551	6.69242	5.92259	7.04703	6.27981	6.2853	6.39962	6.33283	6.12676	6.13339	6.38556	6.04947	5.78577	5.8444	5.93877	6.42078
GPRC5D-AS1	5.35523	5.53234	5.86216	5.42016	5.16623	5.54293	5.73716	6.1205	5.805	5.46898	5.75547	5.91828	5.28301	5.15612	6.37909	5.58582	5.44245	5.74503	5.0671	5.67726	5.44635	5.49931	5.30539	5.79321	5.21688	5.37748	6.1759	5.73375	5.51073	5.18234	5.33212	5.62025	5.7412	6.00204	5.51486	5.54996	5.80208	5.74978	6.01878	5.99864	5.29764	5.86802	5.18204	5.25846	5.16934	4.88296	5.89345	5.0254	5.72745
SP2-AS1	6.55016	7.21475	6.01126	5.29555	6.21325	6.11884	6.29507	6.75546	6.20478	5.95764	5.79419	6.04137	6.65533	6.53995	6.19086	5.18625	5.56979	6.58009	5.81412	6.87983	6.15638	5.71373	6.15626	5.43107	6.23789	6.39998	6.39623	6.72289	5.35823	5.51141	6.13687	6.56896	7.05545	5.58463	5.53812	6.28668	5.68341	5.56952	6.58547	5.64366	6.3927	6.93047	6.78688	5.9384	6.73311	6.20744	6.88445	5.84577	6.91707
LINC01426	2.86613	2.84514	3.06993	2.7228	2.90161	2.80784	2.88802	3.15688	2.63637	2.90139	2.89701	2.99183	3.02096	2.82522	2.8206	2.99149	2.98401	3.02321	3.32825	3.06521	2.75633	2.78939	2.88123	2.96883	2.82275	2.9392	3.34447	2.7911	2.85943	2.66298	2.97935	2.69686	3.19099	2.67109	2.8684	2.75875	2.77399	2.79835	2.90603	3.5562	2.80415	3.10822	2.92778	3.01024	3.06808	2.88133	3.06363	3.39297	3.00904
ELOVL2-AS1	3.07899	2.99301	3.22686	3.24685	3.03265	3.00281	3.19543	3.12364	2.89868	3.04289	3.12071	2.78264	2.85162	2.9707	2.8081	3.06342	2.95351	3.13778	3.09408	2.8148	2.78068	2.83282	3.11536	2.72765	3.03448	3.53411	2.83968	2.74257	2.79556	3.14608	3.10723	2.8534	3.13547	3.03122	2.974	3.03343	3.05994	3.21662	3.36769	3.13335	3.00664	3.07756	3.03863	3.07679	2.9741	2.76444	2.87637	3.11429	2.85706
DOCK4-AS1	2.65769	2.97389	2.8248	3.16556	3.03828	2.93449	3.11599	3.24535	2.90405	2.92309	2.82745	2.78517	3.18754	2.88818	3.0826	3.00311	2.96089	2.78933	2.77162	3.08284	2.72197	2.92622	3.15086	2.90569	3.08645	3.08645	2.90364	2.75757	2.89756	2.88468	2.84624	2.72518	3.0616	2.84394	2.87383	2.81205	2.73151	2.96158	2.92332	3.16226	3.0402	2.91136	2.82649	3.15842	2.85743	3.02345	3.25783	2.85874	3.15491
LINC00648	3.35409	3.15352	3.02338	3.19325	3.04269	3.11771	3.06803	3.21143	3.14855	3.31928	3.1513	3.11994	3.17593	3.23721	3.24148	2.92822	3.05042	3.19226	3.03057	3.30474	3.17318	3.54112	3.52611	3.10928	3.12415	3.14735	3.8503	2.89195	3.0021	3.15635	2.77457	2.80541	3.16718	3.06316	3.20786	3.02184	2.92942	3.10359	3.14615	4.14595	2.90892	2.96669	2.93923	3.05512	3.15417	3.49532	3.15815	3.04637	3.35113
SRD5A3-AS1	4.2814	4.09903	3.99548	4.3227	4.45831	4.0787	3.82296	4.70654	4.08817	3.97819	4.50592	4.11118	4.40313	4.31479	3.7156	4.29311	3.91638	4.16578	3.53922	4.22433	3.88967	4.2317	4.2382	3.87454	4.3377	3.84566	3.91967	4.21007	3.81646	4.14153	3.98387	3.82017	4.28839	4.09552	4.0185	4.24473	4.29699	4.3111	4.36632	4.11671	4.25374	4.50906	4.13199	4.30959	4.16956	3.90385	4.00129	3.60378	4.2659
LOC100506476	5.89976	5.59474	5.82828	5.7234	5.50938	5.84077	5.83992	5.82277	5.95533	5.95217	5.71	5.73687	5.64434	5.71268	5.54672	5.51636	5.71317	5.89901	5.4588	6.84124	6.20358	6.91481	5.90843	5.63256	5.79375	5.86557	5.85635	6.44356	7.44683	6.24545	5.69461	5.35071	5.54611	6.10407	5.44743	5.90859	5.7952	5.71073	5.98673	7.06048	6.52631	6.66047	5.7527	5.3978	5.51198	5.60964	5.65892	5.47073	6.8094
DSCAM-AS1	3.34008	3.46568	3.45019	3.55733	3.70562	3.22032	3.5241	3.35503	3.18438	3.35339	3.52887	3.45682	3.64274	3.51566	3.62912	3.24147	3.3122	3.41105	3.19192	3.2544	3.34764	3.40334	3.64558	3.22482	3.43064	4.08257	3.53209	3.64797	3.51053	3.60421	3.33147	3.33897	3.42327	3.33973	3.19769	3.35811	3.1191	3.38608	3.04667	3.22939	3.46914	3.44281	3.24333	3.36096	3.69525	3.23458	3.15999	3.17906	3.22674
LINC02349	2.81781	2.86208	2.60333	3.13492	2.70673	2.7622	2.97531	3.03753	2.85725	2.88935	2.91653	2.93184	2.73089	3.01002	2.6117	2.95929	2.76617	2.8603	2.77462	2.52725	2.63292	2.95112	2.74518	2.64354	2.74241	2.78386	2.66959	2.94517	2.99299	2.93313	2.57098	2.70644	3.05886	2.78342	3.03558	2.84186	2.92988	2.7314	2.74559	2.84525	2.77347	2.87817	3.1469	2.72943	2.83914	2.91922	2.80919	2.90563	2.61709
LINC01082	6.69397	5.82208	4.9786	5.11708	5.69633	5.91129	5.76575	5.94246	5.83027	5.71463	5.27238	6.1901	5.59211	5.158	5.63699	5.69766	5.95883	5.70756	4.75253	5.74547	5.73434	5.59621	6.02032	5.17122	5.79757	6.3146	5.18396	5.28413	5.88906	5.48785	5.75788	5.13897	5.60147	5.53715	5.61966	6.72035	5.78501	5.88203	5.56942	5.63012	5.60666	5.73666	5.73666	5.43837	5.45001	5.3713	5.91759	4.76162	5.82582
LINC00540	4.74208	4.16101	4.7874	4.33258	4.81656	4.91631	4.86311	4.73398	4.36633	4.60238	5.02801	4.2164	4.3826	4.56837	4.52839	4.63607	4.74053	4.81566	4.61493	4.57688	4.67118	4.56425	4.45915	4.28091	4.57304	4.86085	4.42057	4.3307	4.36435	4.4595	4.19268	4.59422	4.46013	4.47216	4.40433	5.28498	5.06083	4.63225	4.5871	4.57712	4.42542	4.57768	4.68035	4.60591	4.95506	4.703	4.59449	4.59762	4.65853
PXN-AS1	6.56722	6.96282	7.33503	6.44181	6.56923	7.03702	7.40056	7.73517	7.33528	7.40191	6.99939	6.94943	6.98016	6.60432	6.91698	7.25886	6.87387	7.04627	6.74368	7.1658	6.91343	7.26869	7.26389	7.06007	7.12502	7.16851	7.43294	7.17657	7.00983	6.82663	6.9636	7.19535	7.23932	6.92587	6.91827	7.02321	7.39253	7.65167	7.28756	7.64641	6.78663	7.23017	7.47186	6.27082	7.264	6.68507	7.27725	6.76987	7.18755
DDX11-AS1	2.60823	2.89521	2.6637	2.65941	2.67922	2.95321	2.46016	2.64619	2.72609	2.57887	2.94076	2.49249	2.55419	2.43069	2.48348	2.59574	2.94483	2.59381	2.74534	2.58153	2.77077	2.75594	2.77602	2.83661	2.52973	2.72011	2.83772	2.68308	2.66475	2.7922	2.79329	2.83935	2.56053	2.51626	2.7566	2.53557	2.74991	2.5927	2.86243	2.59886	2.89601	2.61417	2.62091	2.75134	2.53936	2.60298	2.59413	2.72425	2.58876
NRAV	7.09704	7.13597	6.54855	6.74629	6.55192	6.84463	7.46523	6.7782	6.92598	7.48534	7.01703	7.04042	7.08269	6.71913	6.97906	6.55709	7.03273	6.39615	8.22207	7.76341	7.56146	6.33805	7.07161	7.16466	6.72126	7.15628	7.28219	7.31259	6.94017	6.63444	7.53617	7.07049	6.93627	6.22987	6.28873	7.22727	7.0487	6.93342	6.80106	6.31736	7.60913	7.27642	7.34701	6.3506	6.94659	7.51556	8.20224	8.10881	7.56425
PCAT6	5.00905	5.26061	5.91575	4.79239	4.89581	5.81338	5.79455	5.43123	5.34573	5.55586	5.22729	5.2576	5.45249	5.27759	4.90332	5.25204	5.3609	5.15598	5.58641	5.57082	5.28478	5.29692	5.26421	5.45695	5.39387	5.33425	6.498	5.00261	5.5374	5.45443	5.3729	4.98793	5.25508	5.36261	5.02864	5.37231	5.47766	5.54224	5.78983	6.23786	5.43673	5.4951	5.24966	5.21608	5.54289	5.07294	5.58406	5.62404	5.70547
LOC100506725	6.30623	4.64188	4.70885	5.08747	4.64972	5.39329	5.8539	6.78118	6.63588	6.42783	5.69075	5.02825	5.3542	4.68418	5.12386	5.22343	5.66959	5.87756	4.51998	4.84639	5.77439	5.40932	6.10745	5.0259	5.11608	6.19087	5.63669	5.7766	5.40265	5.52104	6.18401	4.98531	5.29061	5.74834	5.12063	5.21738	5.66569	6.25124	5.2919	5.70395	5.49351	7.62739	5.23244	5.60627	5.31784	5.05722	5.11355	4.59805	4.8033
CASP12	5.88107	4.98789	6.16587	6.11206	5.21275	5.54608	5.39051	5.37649	5.826	5.65201	5.89316	4.82869	5.58254	5.32503	5.28414	5.3418	5.75614	5.55662	4.66589	5.4773	5.51969	6.29793	5.66831	6.04255	5.54624	5.57053	6.32674	5.39839	5.99451	5.65937	5.38753	5.72036	5.10446	6.28691	5.67458	5.76057	5.63219	5.59116	5.69884	5.52453	5.10745	5.25636	5.37741	5.16402	5.60615	5.86653	5.79624	4.73189	5.53243
LINC00629	2.95176	2.63127	2.77509	2.5216	2.61574	2.71718	2.64914	2.65015	2.67543	2.62716	3.07302	3.10907	2.87548	2.75127	2.59987	2.70284	2.85501	2.7426	2.9022	2.77245	2.79975	2.95482	2.6876	2.79568	2.7787	2.83784	2.8124	2.74402	2.91896	2.80273	2.60099	2.89498	2.58868	2.86105	2.73805	2.64478	2.73215	2.58021	2.79965	2.71615	2.49588	2.75186	2.95797	2.71166	2.71629	2.71101	2.61179	2.8171	2.39586
IGSF11-AS1	2.72828	2.60924	2.53517	2.58966	2.63889	2.7698	2.88353	2.73065	2.5346	2.56144	2.56978	2.66918	2.58004	2.86429	2.57528	2.50154	2.58428	2.62822	2.66713	2.69831	2.61829	2.5339	2.53331	2.41846	2.55764	2.83726	2.3838	2.77799	2.79108	2.71523	2.60532	2.53693	2.73251	2.49035	2.64759	2.73293	2.50557	2.6318	2.55453	2.80962	2.68016	2.56596	2.72214	2.55275	2.65735	2.40235	2.57855	2.70258	2.69747
TRG-AS1	6.25799	6.48533	5.57408	5.6034	6.14411	6.02885	5.37485	6.28719	5.59671	6.0417	6.08623	5.84825	6.29739	5.96662	5.51557	5.82405	5.4719	6.20367	6.34944	5.74678	6.1946	6.14496	6.0382	5.9333	5.8573	5.46295	6.4751	6.27782	5.93793	6.06561	6.26	5.49499	6.20878	5.8562	6.7379	5.69624	6.18597	5.87937	6.74378	6.42711	6.13767	6.18136	5.73854	6.33697	5.98638	5.29153	5.67707	6.38987	5.78956
TSPOAP1-AS1	5.80755	5.40378	5.60912	5.82317	5.55981	5.67165	5.29959	5.65027	5.79643	5.58819	5.7097	5.70655	5.58169	5.80212	5.23268	6.04018	5.50437	6.15681	5.60153	5.25705	5.90883	6.01318	5.61662	5.59278	5.50152	5.6493	6.18493	5.23024	5.87188	6.40171	5.73564	4.99346	5.36892	5.79931	5.94453	5.99397	6.15752	5.90246	5.96329	5.88733	5.59171	6.07992	5.4522	5.67255	6.08728	6.01853	5.6025	5.68977	5.16322
LINC01354	4.47031	4.87142	4.74616	4.33723	4.45506	4.39235	4.48877	4.21591	5.22934	5.17016	4.31417	4.15536	4.42789	4.19548	3.93497	4.34042	5.19299	4.15832	4.32837	4.77519	4.67754	4.49767	4.35084	4.47022	4.53222	4.62258	4.86574	4.63097	4.42108	3.85653	5.22239	4.3533	4.77949	4.47427	4.58161	5.18946	4.44545	4.89766	3.68828	4.38256	4.94609	4.06039	4.07072	4.40176	4.39066	4.74398	5.05949	4.35957	4.78172
GAS1RR	3.84126	3.27294	3.96364	4.0527	3.79424	3.48338	3.86315	3.63324	3.76523	4.21364	3.88711	3.78753	3.7782	4.34892	4.22623	3.89125	4.08582	3.87919	3.49877	3.58663	3.80047	3.74691	3.97767	3.62474	4.03201	3.85586	3.89443	3.56411	4.17168	3.77535	4.05318	3.31275	3.67554	3.80412	4.25566	4.27752	4.46246	4.30744	3.709	3.67705	3.76995	3.81294	3.70976	4.25179	3.87452	3.82961	3.93888	3.69248	3.9156
LINC00513	4.90481	4.84409	4.98293	5.0654	4.94078	5.07651	4.95151	5.10617	4.94546	4.76025	4.78253	5.06732	5.03105	5.16851	4.58399	4.94853	5.40059	4.9301	4.76992	5.11768	4.64931	4.89326	4.86723	4.61342	4.80629	4.82249	4.57732	4.83399	4.47351	5.01038	4.66086	4.83309	4.77059	4.8842	5.47828	5.00136	5.13971	4.88047	4.5422	4.79244	4.60078	4.44989	4.83012	4.93923	4.7011	5.11722	4.89523	4.85403	5.04546
LINC00933	4.40237	4.25189	4.00988	4.4405	4.15544	4.06528	4.07907	4.02731	4.02499	4.08755	3.95733	4.05091	4.23676	4.29618	4.02777	4.05462	4.47232	4.272	4.06926	4.32837	4.0181	3.9777	4.06952	4.10154	4.31067	3.69221	4.24569	4.18604	4.16826	4.28723	4.20465	3.96183	4.06847	4.73129	4.41707	3.9168	4.28103	4.21347	4.29137	3.71876	4.17053	4.24861	3.71186	4.30335	3.72427	4.01096	3.67949	3.91165	3.93491
MAP3K2-DT	5.58494	5.36768	5.71004	5.52677	6.10129	6.44528	6.29587	5.86907	6.25625	6.27633	4.82676	3.62142	5.75771	6.16353	6.13182	6.17248	5.65079	5.26464	6.54426	5.11991	5.52504	5.69268	5.08084	6.11134	3.48514	6.07903	3.70825	5.47219	6.2644	5.44489	6.39336	5.97203	6.36207	3.54357	6.01538	5.98507	6.28051	6.51651	5.80177	6.46947	6.69372	6.01486	5.95061	5.82493	6.07956	5.62511	5.25346	6.38674	5.32604
PTPRG-AS1	3.05157	2.79059	2.76556	2.70636	2.72474	2.82273	2.65825	3.03798	2.78304	2.95265	2.68543	2.96171	2.8125	2.75376	3.19427	2.90047	3.16401	2.94991	3.12865	2.72949	2.96915	2.72518	2.86996	2.81904	2.81946	2.84581	4.58717	2.73809	2.74712	2.63309	3.02746	2.75585	2.82173	2.82875	2.70165	2.74869	2.90661	2.91774	2.88513	2.89345	3.07911	3.32577	2.86562	2.73489	2.7701	2.80326	2.87888	3.19557	2.71451
LOC100507006	6.22619	6.37877	6.19019	6.51104	6.56682	6.50388	6.46679	5.97638	6.05997	6.46591	6.41145	5.95808	5.98977	6.27056	6.13458	6.41561	6.32728	6.34529	5.93087	5.94944	6.21267	6.45867	5.9859	5.45027	6.27142	6.30101	6.21144	6.01517	6.08084	6.04669	6.3539	6.41561	5.9326	6.34264	6.8065	6.08949	6.28305	6.6094	6.19113	6.7336	6.52882	5.80107	6.4633	6.2994	6.02838	6.30445	6.22339	6.11943	5.94346
LINC00844	5.65527	4.47197	6.81157	7.53867	5.41431	6.06853	5.3801	8.28437	6.95288	6.29983	5.85353	4.72698	5.26699	6.3832	4.31162	5.76972	6.96572	5.49421	5.81998	4.47072	4.99239	5.55405	5.53236	5.03047	5.55735	6.70378	7.69704	5.39089	7.31358	3.54464	4.86907	4.90125	6.66502	7.4901	6.56224	7.04647	6.28507	8.33089	6.37673	6.29755	6.9226	6.58595	6.87862	7.30673	6.38942	7.06611	7.30874	5.8517	4.5836
MRLN	3.99168	4.31567	3.48956	3.91394	4.12756	3.8494	5.34565	3.64798	3.91406	5.70812	4.28077	4.14212	3.85982	4.48592	4.3771	4.49423	3.93801	3.46509	5.88672	5.10721	5.34233	3.46988	4.39253	5.3261	3.89348	5.11374	4.25125	4.38286	4.60596	4.04127	5.32923	3.99721	3.53554	3.81598	3.84278	4.00172	4.97678	3.8188	3.22139	3.56909	6.3961	4.85561	4.48348	3.90037	4.26048	5.98702	5.67705	5.9838	5.1404
PITRM1-AS1	4.45652	4.09051	3.86197	4.09856	4.16329	4.23544	4.18711	4.29658	4.21158	4.16848	3.82635	4.04001	4.40617	4.53119	4.32056	4.70621	4.279	3.99613	4.6654	3.86576	4.03153	4.17539	4.22986	4.16971	4.18809	3.79453	4.20695	4.30954	3.96193	4.14089	4.31023	4.31296	4.2115	3.91684	4.3647	4.07116	4.15637	4.18614	3.90392	4.14295	4.02759	3.88301	4.01975	4.21516	4.37533	4.15189	3.71817	4.846	3.93188
LINC00845	3.49168	3.24394	4.00985	3.60312	3.57812	3.53768	3.46125	3.92082	3.41571	3.61816	3.56282	3.47716	3.64239	3.80124	3.49116	3.59819	3.56141	3.50957	3.61816	3.65556	3.49262	3.07589	3.62476	3.39469	3.32783	3.89773	3.68949	3.61301	3.74921	3.66452	3.6144	3.34128	3.59811	3.72017	3.52423	3.41464	3.55113	3.42979	3.64686	3.70135	3.45458	3.76678	3.13558	3.50472	3.52137	3.7477	3.35756	3.63575	3.67989
LINC00703	3.30417	3.0712	3.29697	3.39668	3.24516	3.1166	3.1509	3.54565	3.11947	3.41862	3.25738	3.12673	3.20009	3.18164	3.35713	3.07225	2.93171	3.48266	3.20609	3.30502	3.31824	3.57291	3.21961	3.14445	3.19596	3.14116	3.11585	3.04282	3.11605	3.28765	3.03954	3.09078	3.20118	3.16051	2.97874	3.02943	3.24622	3.00371	3.27121	3.35494	2.98463	3.19487	2.9259	3.10929	3.09497	3.23204	3.10286	3.23987	3.33144
PSMD6-AS2	5.65975	5.73197	5.95849	6.05214	6.03418	6.06437	6.33674	5.63338	5.64103	5.25856	6.42982	5.92141	6.01026	6.35108	5.90865	6.17358	5.82582	5.78777	5.81391	5.4811	5.67982	5.87724	5.50761	5.87516	5.8357	6.48034	5.63831	5.77705	5.64388	5.97031	5.58451	5.40611	5.97423	5.66929	6.10076	5.38577	5.80944	5.74846	5.37773	6.27771	6.17921	6.12947	5.3692	5.81705	5.99881	5.46683	5.58868	5.85843	5.74766
DLG1-AS1	3.25449	3.25211	3.81339	3.48087	3.61158	3.51904	3.21643	3.93561	3.60864	3.41199	3.85137	3.65405	3.75913	3.51911	3.76485	3.72242	3.72608	3.67975	3.72113	3.57316	3.54043	3.51503	3.60661	3.52352	3.51866	3.41463	3.53035	3.29286	3.62962	3.34886	3.32137	3.37374	3.53893	3.10825	3.17193	3.4693	3.78051	3.84429	3.93525	3.52771	3.37802	3.40363	3.58298	3.4702	3.76818	3.69218	3.4287	3.7235	3.59126
ASAP1-IT2	4.71223	4.79941	4.63112	4.88921	5.40069	4.76827	4.81059	4.65872	4.90252	4.50331	4.648	5.14426	4.78769	4.93361	4.51947	5.0515	4.494	4.70741	4.57582	4.33572	4.54638	5.04675	4.40191	4.74133	4.6495	5.03461	4.67828	4.74141	4.48324	5.55242	4.68599	4.66634	4.83729	4.88909	4.92607	4.4289	4.46129	4.5847	5.03407	5.14432	4.71992	4.63474	4.54045	5.19021	4.61002	4.53491	4.93642	4.60065	4.28439
SPART-AS1	3.41321	3.77251	3.52729	3.46219	3.4064	3.50877	3.87173	3.73747	3.46234	3.26474	3.17935	3.69639	3.67382	3.40101	3.48253	3.60188	3.44541	3.80226	3.5483	3.86882	3.52456	3.26862	3.53013	3.56542	3.84163	3.31377	3.44879	3.84061	3.47134	3.15816	3.18083	3.52999	3.48379	3.62119	3.64696	3.59749	3.36269	3.48872	3.7592	3.668	3.41255	3.57471	3.6065	3.73271	3.37274	3.52712	3.97021	3.52413	3.89777
LINC00708	3.77872	3.89429	3.88006	3.72232	3.79052	3.98946	3.50263	3.71635	3.4963	3.53123	3.69602	3.90083	3.89156	3.84294	3.72068	3.8724	3.71745	3.55546	3.76338	3.57963	3.80368	3.48914	3.89362	3.74556	3.59701	3.95374	3.80751	3.95551	3.78197	3.81281	3.63722	3.93644	3.72055	3.71965	3.77976	3.86032	3.63539	3.84273	3.58684	3.64872	3.59641	3.66583	3.76657	3.59898	3.54514	3.92985	3.55427	3.8996	3.56969
RNF157-AS1	5.54198	4.9139	5.07825	5.57012	5.11424	5.06953	5.54787	5.42311	5.10459	5.9961	4.89093	4.96793	5.32914	5.2059	5.45841	5.1108	4.82844	4.7276	5.83662	5.7753	5.9719	5.3084	4.98133	5.73117	4.7497	5.58018	6.28841	5.02784	6.10742	5.25743	6.51604	5.08983	5.40615	5.49281	5.20667	4.81485	5.29294	4.66526	5.14268	5.43111	6.23652	5.18545	5.23485	5.35865	5.53089	6.08302	6.44662	5.83363	5.81235
VWA8-AS1	3.1576	2.96774	2.96487	2.94958	2.97174	2.90479	3.171	2.8025	2.75123	3.43119	3.09196	3.13193	3.05045	3.05045	3.12239	2.98673	3.05368	2.99141	3.56356	3.19718	3.61503	2.95667	2.97451	3.28657	2.90282	3.46865	3.15912	3.0013	2.99365	3.15438	3.5011	2.99365	2.98363	3.0103	2.8645	3.00809	3.01678	2.93941	2.97538	3.09939	3.47776	3.04216	3.05791	2.84184	3.10066	3.55357	3.44675	3.69209	3.21085
MEG9	3.83307	3.82903	3.95642	4.29512	4.42422	4.14329	3.73586	4.13261	3.84477	3.68117	3.84861	4.1415	4.22987	4.03217	4.02262	4.1874	3.84723	3.99309	3.86289	3.91712	4.06773	4.4783	4.06387	3.90749	3.95706	3.93159	4.00619	4.00459	3.92414	4.21005	3.88949	4.08477	4.03116	3.7525	4.28702	3.94355	3.85326	3.84126	4.11036	3.94405	4.02889	3.94473	4.14435	4.26819	4.20856	4.17972	3.66074	3.81632	3.93038
STX18-AS1	3.46925	3.44569	3.50466	3.81757	3.59354	3.8987	3.85935	4.47651	3.45825	3.81013	3.84073	3.32295	3.40468	3.71868	3.19645	4.20034	3.56275	3.8372	3.57035	3.77649	3.9463	3.70987	3.3497	3.50473	3.73359	3.93959	3.49634	3.50821	3.45374	3.44274	3.28374	3.53973	3.60004	3.7908	3.72651	3.71412	3.70501	3.67409	3.76087	3.53882	3.68545	3.79772	3.80784	3.47235	3.85026	3.63706	3.75671	3.58637	3.77009
MINCR	5.38372	5.66247	6.7269	5.24354	5.52933	5.38917	6.36876	5.78821	6.61386	6.07725	5.94639	5.70372	5.4241	5.83325	5.12888	6.24725	5.77546	6.21475	5.77617	5.81028	5.54374	5.70605	5.96899	5.8571	6.28016	5.58562	5.65769	5.8579	6.10042	5.20979	5.65101	5.44571	5.99872	6.26196	5.99619	5.70857	6.20561	6.55479	5.53094	5.66987	5.90864	5.76662	5.74416	5.33989	5.40777	5.70013	5.78464	5.64685	5.84674
ERVK13-1	5.80149	5.30727	5.10916	4.9981	5.21915	5.01275	5.26616	4.70892	5.31699	4.69412	4.66308	5.03582	5.23835	5.54942	5.11939	4.97706	4.74193	5.12022	5.29756	5.04005	5.38354	5.98544	4.80297	4.97395	5.43642	5.09563	5.13536	5.05407	5.11145	5.44509	4.77197	5.30594	5.29193	4.72584	5.43798	5.14147	4.79299	4.94712	5.20867	5.52139	5.46188	4.79477	4.98097	5.02174	5.07939	5.2678	4.83135	5.44493	5.31599
C1QTNF1-AS1	5.51948	4.7095	4.68347	5.47504	5.37457	4.88052	4.9145	4.99543	5.07265	4.82855	4.88726	5.07155	5.18092	5.04007	4.81729	4.96988	4.97987	5.31365	4.84314	4.67873	4.6203	5.85121	5.09916	4.88031	4.48928	5.58291	4.76852	4.80173	5.0078	4.92896	5.09242	4.5822	4.56925	5.22113	5.18291	4.67334	5.11979	4.80796	5.04835	4.92449	4.87104	5.11352	5.53372	4.90639	5.04644	5.24756	5.05674	4.80584	4.69419
LINC02551	2.35643	2.34923	2.25808	2.39304	2.31385	2.36513	2.47947	2.29808	2.44385	2.33149	2.28833	2.35028	2.48807	2.45741	2.4817	2.27371	2.24825	2.50554	2.43884	2.3019	2.32777	2.2188	2.36609	2.48774	2.47128	2.37635	2.52241	2.33505	2.48894	2.56542	2.38471	2.34844	2.33376	2.39243	2.34923	2.24825	2.48557	2.5836	2.38589	2.32374	2.35309	2.36114	2.3337	2.3665	2.32077	2.49401	2.35247	2.44055	2.29069
DPH6-DT	4.92418	3.84571	4.23614	4.26884	4.39646	4.13705	4.18207	3.93814	4.34974	4.07807	3.92943	4.09897	4.19326	3.6841	3.69744	3.86183	4.05683	3.88185	3.9028	4.1208	4.06399	3.90092	4.34933	3.98921	4.02678	4.39489	4.34254	4.00408	4.0308	3.63123	4.46032	3.78183	3.82149	3.90862	4.02654	4.73378	4.08125	3.95997	3.7509	4.10876	3.90019	4.20875	3.92839	4.08696	4.25947	3.82228	4.18357	3.90358	3.96558
GRID1-AS1	2.84885	2.72255	3.20201	2.73926	2.97512	2.94268	2.92002	2.66804	3.00001	2.91942	2.582	2.67276	3.08636	3.03209	2.86945	2.71538	3.0545	2.95791	2.71093	2.98356	2.83936	2.86828	3.15007	2.90668	2.89864	2.88884	2.83191	2.76288	2.9701	2.69647	2.92977	2.86809	2.94713	2.65964	2.73992	2.96607	3.01635	2.82423	2.95801	3.05614	2.64196	2.89119	3.22966	2.85933	3.00541	3.03957	2.77388	2.7028	2.99374
IDH1-AS1	5.37656	5.9128	5.93287	5.15725	5.10382	6.23944	6.003	6.09426	5.94209	5.44781	5.26874	6.12682	5.53808	5.34215	5.65861	5.43986	5.64168	5.59703	6.5003	5.91548	6.00173	5.634	6.11182	5.45717	5.9465	6.27922	5.82439	5.95813	5.59473	5.03878	6.04824	5.47828	5.6851	5.55231	5.42345	5.529	5.62354	6.09677	6.1527	5.87914	6.062	5.96212	5.81199	5.68077	6.45242	5.93716	6.36115	6.42917	5.8486
LOC100507477	4.94613	4.63418	4.67599	4.90096	4.42001	4.78006	4.30153	4.51922	4.46021	4.7311	4.50881	4.51568	4.59208	4.34296	4.24184	5.0056	4.92011	4.78517	4.38088	4.98297	4.42058	4.54205	4.41342	4.38339	4.59279	5.15445	4.50868	4.57282	4.96842	4.38542	4.55814	4.2554	5.19312	5.23636	4.61033	5.03785	4.68219	4.9954	4.67344	4.51241	4.98213	4.54647	4.68484	4.31184	4.35601	5.08786	4.95533	4.14886	4.92962
LINC02615	6.35324	6.25363	5.04416	6.38899	6.05001	5.4798	6.08939	5.3251	6.12659	5.08367	6.04826	6.02583	6.272	4.83663	5.91377	6.13872	6.37438	6.30021	6.22619	6.35705	6.47559	5.30199	6.55187	5.81442	6.67549	6.34968	5.19303	6.34066	6.15135	5.37183	5.50575	5.3786	6.52896	6.1454	6.5253	6.73554	5.59196	6.42003	6.57111	5.99369	6.24761	5.48515	5.58259	5.39813	6.50542	5.31225	5.98426	6.14112	6.0532
ARHGEF26-AS1	7.23468	6.99969	8.23526	7.91865	7.21594	7.53036	7.85548	7.07114	8.10314	7.58782	8.02894	7.77129	7.55323	6.89261	7.01119	7.25706	7.6382	7.62269	7.48904	8.06361	7.61335	8.06465	7.5771	8.02613	7.99045	8.66675	6.1717	7.68199	8.13019	7.76325	7.76773	7.27652	6.80383	8.22472	8.32671	8.03673	8.24069	8.36407	7.22977	7.68567	7.67147	6.82737	7.37743	7.06725	6.90969	8.04858	8.28167	7.52972	8.10476
STRIT1	2.4078	2.3844	2.47615	2.44475	2.37778	2.72309	2.49349	2.36582	2.4246	2.31478	2.41119	2.56093	2.4246	2.54764	2.37186	2.55759	2.34522	2.54509	2.56667	2.5127	2.31495	2.62686	2.29176	2.45091	2.34536	2.6563	2.7582	2.34974	2.73879	2.69841	2.39925	2.51985	2.50527	2.58528	2.61386	2.60908	2.30884	2.38076	2.49188	2.41153	2.4342	2.54218	2.72961	2.67564	2.56492	2.4556	2.61006	2.62719	2.48065
LINC01504	6.43499	6.98331	6.69361	6.70503	7.39931	6.6509	7.04376	7.03318	6.39473	6.8168	6.9492	6.95619	7.18652	6.75955	7.04325	6.43724	7.2307	6.79427	7.08658	7.08565	6.43087	6.70405	6.06559	7.82637	6.8558	6.72851	7.45464	7.35228	6.69178	7.27439	7.20533	6.18047	6.49046	7.094	6.49814	6.64102	7.10213	7.35016	6.86141	7.07921	6.45985	7.01221	7.37139	6.61584	6.53901	7.04428	6.18537	7.12149	7.05485
LINC00968	7.13027	6.42157	5.7084	7.5702	6.81981	7.42942	7.70444	6.95802	7.36176	6.77775	6.92768	7.30114	6.46834	5.52644	6.74431	6.222	8.21587	8.59897	6.74859	6.99968	7.70208	6.8373	6.94606	8.805	6.5045	7.62568	7.73686	7.99152	6.65925	7.21563	8.30455	6.53436	7.81852	8.04369	7.82783	9.66086	8.08422	8.82131	7.86798	6.36012	6.98112	7.82277	6.31024	6.84872	6.47098	6.87599	6.77954	6.92649	7.04911
LOC100507642	6.30345	7.17102	7.06187	6.57496	6.59167	7.16588	7.01805	6.35727	6.97104	6.68238	6.85974	6.78878	6.78916	6.90585	6.73482	6.72948	6.97151	6.91679	6.53782	6.81567	6.81252	6.78104	7.24831	6.70452	6.49103	6.50552	6.34409	6.67005	6.7788	6.4513	6.84206	6.93956	6.77478	6.67037	6.39326	6.85349	6.96031	4.82901	6.78552	7.73782	5.94373	7.001	7.4935	7.54052	6.79543	6.98787	6.80897	6.52445	6.77079
GJC1	6.38468	6.57627	6.21321	6.14511	6.06597	6.26556	6.51123	6.43488	6.5821	6.28476	6.52815	6.21712	6.9705	5.95992	6.25839	6.76526	6.62915	6.78565	5.25101	6.37494	6.20266	6.64522	6.40295	5.52468	6.57023	6.80839	5.50776	6.82914	6.47596	6.12341	6.17169	6.65583	6.45769	6.57208	6.69738	6.36288	6.37815	6.27223	6.62443	5.90041	6.23597	6.58138	6.10782	6.75718	6.57618	6.29041	6.09947	5.28441	6.36483
LHX4-AS1	5.89002	5.41083	5.84161	5.62492	5.47428	5.67104	5.85044	5.42626	5.93275	5.2615	5.481	5.2767	5.7637	5.43188	5.48723	5.25409	5.3867	5.95255	5.02888	5.57652	5.36226	5.52596	4.97246	5.59919	5.26484	5.42471	5.55007	5.8302	5.32177	4.96162	5.56338	5.59046	5.54868	5.27296	5.67699	5.90875	5.33473	5.26725	5.82741	5.29629	4.83658	5.15653	5.50867	5.14629	5.21017	5.31751	5.27409	5.04526	5.68434
ABCC5	7.03388	6.96273	7.07081	6.64872	6.95999	7.13845	7.78172	6.50543	7.38505	7.27775	6.94652	6.69868	6.75719	6.63787	7.07358	6.8953	7.54745	6.85175	7.80346	7.58737	7.05987	6.52349	7.20562	7.5664	6.87478	7.53373	8.66271	7.14176	7.43593	6.76976	7.28579	6.90555	7.34382	6.87424	6.88812	7.18071	7.21961	6.83951	6.964	7.54932	7.75982	6.8212	6.7279	6.88426	6.92239	6.8698	7.53778	7.91153	7.40741
NR1H3	8.9624	8.5071	9.36203	9.01426	9.01964	9.13681	8.79008	9.06918	9.4702	9.15577	8.56844	8.60173	8.88645	9.06096	8.43725	8.95796	8.9497	8.68409	10.5736	9.0485	9.3932	9.02713	8.99534	9.65884	8.8058	9.11896	9.09111	9.10896	9.81508	8.91477	9.23668	8.47493	8.80113	8.89635	9.20983	8.98876	9.06439	9.74024	9.04698	10.0752	9.19831	9.54971	9.06591	8.87453	8.91653	8.67638	9.0417	10.7298	9.10068
DIO2-AS1	3.48485	3.31295	3.5754	3.37695	3.51916	3.74568	3.97121	3.44899	3.21859	3.19696	3.36224	3.58593	3.49882	3.516	3.612	3.56831	3.4276	3.39678	3.32254	3.79862	3.41474	3.37474	3.62728	3.07055	3.33673	3.66084	3.56106	3.34581	3.3956	3.5481	3.2637	3.35684	3.11562	3.40641	3.20982	3.32395	3.52882	2.94637	3.31358	3.57127	3.27651	3.41907	3.63977	3.60497	3.16946	3.49842	3.50553	3.41613	3.91151
DNM3OS	6.02971	5.99283	5.55179	5.91955	6.20073	4.98079	5.69876	5.91413	5.71296	5.41746	5.69902	5.76945	6.24453	5.91262	5.75277	5.7645	5.95684	6.0152	5.17425	5.77976	5.66358	5.64543	5.43569	4.73974	5.82051	5.17933	5.8767	5.71669	6.0049	5.73636	5.82524	6.32916	6.24236	5.15821	5.87125	5.71558	5.90057	5.8174	6.05924	4.99125	5.91879	5.48552	5.41752	6.482	5.84694	5.39223	5.86681	5.35334	5.84561
NNT-AS1	7.91055	8.16773	8.20609	7.98156	7.85644	8.33819	8.17668	8.31094	8.42634	8.28415	7.91988	7.72709	7.57087	7.42487	8.1716	7.64491	8.24438	8.03983	7.39452	7.86219	8.19328	8.15519	8.28308	8.306	8.5156	8.28348	8.49435	8.38494	8.42123	7.38631	8.09631	8.47339	8.47211	8.41635	8.37461	8.57835	8.32014	8.5045	8.55595	8.059	7.90262	7.88614	8.18209	7.47225	8.0406	7.54304	8.34477	7.34302	7.87638
GS1-24F4.2	2.89673	3.05364	2.99073	2.71709	2.83104	2.77342	2.97662	3.00994	3.00851	2.96529	2.82349	2.87666	3.03033	2.8275	2.61372	2.97704	2.66787	3.19258	2.99634	2.92536	3.00473	2.8815	2.90798	3.07785	2.64399	2.87692	3.00598	2.75204	2.88402	2.72607	2.83489	3.00293	2.88874	2.77453	2.90548	2.58583	3.02074	2.74449	3.07831	3.16125	3.08757	2.89657	3.06124	2.68953	2.93042	2.90804	2.78843	2.99523	2.95601
TMCO5B	2.87359	2.89935	2.98273	2.72968	2.66966	2.92549	3.09596	3.22156	3.0394	2.99342	2.84482	2.56935	2.73035	2.95453	2.79353	2.8353	2.94044	3.16967	2.7792	3.02245	2.91745	2.95383	2.83524	2.7097	2.92139	3.14916	2.83049	2.87906	2.68877	2.92618	2.78602	2.79372	2.90514	2.81379	2.86188	2.73555	2.66975	2.88363	2.66929	2.9271	2.96113	2.52476	2.84057	2.89937	2.84584	3.07241	2.81236	2.84828	3.07651
POU6F2-AS2	2.73468	2.55137	2.67168	2.74008	2.68706	2.50653	2.65196	2.73181	2.40368	2.60516	2.41472	2.5959	2.6613	2.62299	2.6315	2.41333	2.66548	2.71185	2.63208	2.53557	2.64439	2.75421	2.92621	2.59649	2.47383	2.47863	2.57885	2.46989	2.41097	2.52505	2.43637	2.44812	2.50523	2.98844	2.51428	2.43303	2.75421	2.46395	2.71202	2.87871	2.51448	2.72054	2.80998	2.6343	2.49546	2.8193	2.49259	2.64959	2.54071
CDH10	5.36923	4.52281	5.11589	4.21551	5.00895	4.68929	5.20032	4.73435	4.79828	4.00215	4.30849	4.2471	4.93271	3.8982	4.52024	4.57514	4.82296	5.02635	4.49895	6.67544	5.05494	4.26932	4.75453	3.77703	4.28317	4.90176	4.10845	5.12659	4.57478	4.81244	4.56948	4.47852	4.2388	4.83162	4.95866	4.18851	5.17672	5.05254	4.7227	4.55019	5.0541	4.82291	4.93905	4.20823	4.22468	4.44065	4.79044	4.53046	6.51656
GPC6	6.47612	7.26364	6.53954	5.87125	6.63214	6.44643	6.4988	6.55759	7.06263	6.16351	6.4826	6.96121	7.51781	6.0194	6.42475	6.45401	6.74364	5.66728	6.72945	6.58444	6.4445	6.75876	6.49432	6.94475	7.11091	6.25995	6.78897	6.92088	6.90576	6.52816	6.54295	7.05135	7.28416	6.83239	6.2974	7.26963	6.38062	6.2006	7.60702	5.84537	6.93151	7.43976	6.8305	7.26659	6.65454	6.38587	6.77369	6.73512	6.57755
EGFLAM-AS4	3.94067	3.14091	3.44041	3.59883	3.4073	3.40853	3.53414	3.69364	3.35098	3.40896	3.33012	3.3969	3.49659	3.15102	3.22805	3.3813	3.44736	3.23428	3.49468	3.11292	3.08153	3.33553	3.30691	3.40726	3.25076	4.0519	3.43917	3.52287	3.17936	3.35686	3.12318	3.54008	3.35441	3.15786	3.37669	3.39461	3.11705	3.27098	3.52818	3.16393	3.10034	3.36387	3.67446	3.50562	3.39488	3.59666	3.23693	3.44439	3.1359
LINC00536	3.29366	3.36711	3.19972	3.05387	3.24446	3.06174	3.45201	3.395	3.32272	3.28796	3.18255	3.39643	3.63558	3.58916	3.2896	3.43856	3.29083	2.99078	3.24506	3.33982	2.97683	3.27584	3.16181	3.29103	3.28895	3.41923	3.40148	3.03602	3.17399	3.17911	3.12272	3.2736	3.20837	3.27479	3.05839	3.2527	3.34838	3.2568	3.27804	3.25065	3.25461	3.01625	3.38762	3.0964	3.18702	3.35256	3.23614	3.29848	3.46231
LINC00564	2.34992	2.35727	2.67163	2.74719	2.60026	2.53618	2.63459	2.77932	2.75049	2.43462	2.49219	2.55763	2.60322	2.48764	2.46469	2.35432	2.56444	2.7584	2.45907	2.59334	2.37674	2.48097	2.57117	2.36703	2.65028	2.4619	2.52341	2.46549	2.59748	2.55318	2.49841	2.36318	2.62082	2.6356	2.5285	2.42616	2.39549	2.72264	2.64026	2.53599	2.4905	2.52622	2.57689	2.6051	2.74041	2.57139	2.58999	2.44998	2.58594
SNRK-AS1	4.93977	4.73974	4.67778	4.80423	5.04116	5.0515	4.8148	4.37759	5.05458	4.86674	4.83304	4.94913	4.87201	5.00256	4.45999	4.91078	4.47498	5.1981	4.30697	4.78041	4.5541	5.00757	4.38148	4.62384	4.72706	4.83896	4.2076	5.09547	4.64805	5.13817	4.88566	5.08301	4.88934	4.85104	5.00992	4.29646	4.94909	4.46398	5.05739	4.51456	4.85944	4.56696	4.76476	4.9595	4.71126	4.94913	4.52456	4.34031	4.81617
RBMS3-AS3	5.44489	5.41522	6.30218	5.4592	5.44106	5.46104	6.04524	5.27199	6.67039	6.56409	6.43851	4.60002	5.7049	4.90172	5.87224	5.51321	6.20562	6.41157	5.68166	6.19984	6.05095	6.01064	6.00576	5.94359	6.12476	6.43409	5.63045	5.95165	6.51884	5.11168	5.20831	6.23528	6.19167	6.86587	6.05655	6.55317	6.34384	6.57861	6.05195	5.52922	5.8405	6.14156	5.5579	4.79423	5.63221	5.5258	7.2686	5.67173	6.17048
NAV2-AS5	3.11804	3.39668	3.47313	3.2667	3.50833	3.33787	3.26474	3.36061	2.82133	3.29525	3.40684	2.97248	3.28149	3.09212	3.30691	3.39402	3.25227	3.28926	3.04799	3.07048	3.27947	3.19813	3.34812	3.3026	3.12099	3.47651	3.11314	3.3287	3.40694	3.13332	3.40221	3.20393	3.4358	3.29169	3.34934	3.33848	3.03242	3.02964	3.25972	3.03363	3.34651	3.13534	3.36627	3.43048	3.07954	3.71114	3.36678	3.07937	3.02711
NAV2-AS2	4.39991	5.02718	4.68107	5.19804	4.56753	5.36081	5.987	5.31398	5.07185	5.11187	4.64813	4.44951	5.03404	4.75654	4.56868	4.80026	4.98055	5.21698	4.34157	6.55564	5.34999	4.85146	5.22643	4.93171	4.79746	5.39115	5.01884	7.01633	4.54942	4.75605	4.81879	5.25844	5.05641	5.67464	4.75821	5.40327	5.3207	5.03869	4.64297	5.22029	4.86658	4.83578	4.62745	5.02907	4.49969	4.41675	4.79016	4.32504	6.48195
MAGI2-AS2	3.55795	3.71339	3.94472	3.70459	3.63053	3.81006	3.5213	3.42081	3.6685	3.48576	3.75855	3.48591	3.85909	3.66455	3.93958	3.64724	3.7593	4.06704	3.56079	3.49715	3.42334	3.64196	3.38465	3.64796	4.01353	3.70237	3.512	3.56311	3.56087	3.88903	3.66426	3.38369	3.64517	3.47283	3.53485	3.72363	3.60576	3.82958	3.68316	3.84195	3.57569	3.66264	3.8228	3.81824	3.52068	3.76864	3.76287	3.43389	3.49824
PRRT3-AS1	6.56325	7.81338	6.89569	6.13387	6.60216	6.38194	6.81248	6.25947	6.71935	5.97083	6.12769	6.58952	6.93327	6.03022	6.86658	5.6085	6.32107	6.58914	6.355	7.10955	6.38682	5.82538	6.73618	5.82487	6.73849	6.63227	6.44083	7.05732	6.29108	6.2282	6.69306	7.23076	7.5418	6.39058	6.26483	7.14811	6.23267	5.83237	6.92413	6.62282	5.54484	6.92887	6.13604	6.16111	7.27369	6.35288	6.87477	6.32118	7.12357
CADM2-AS1	2.7517	2.67686	2.39051	2.59433	2.716	2.72484	2.64025	2.77473	2.73594	2.75465	2.90931	2.74327	2.53315	2.5015	2.55485	2.44911	2.76996	2.50465	2.4763	2.43984	2.51308	2.67358	2.60514	2.46629	2.65559	2.67379	2.54248	2.53482	2.67361	2.60071	2.60452	2.50979	2.57596	2.50286	2.52613	2.42389	2.60545	2.56873	2.43744	2.61325	2.44422	2.59058	2.38356	2.45225	2.46004	2.60979	2.46122	2.45412	2.48766
LINC00559	3.06506	3.18856	3.46154	3.34189	3.35958	3.32746	3.62868	3.49627	3.19467	3.2326	3.28309	3.48117	3.54784	3.73996	3.29298	3.20711	3.04759	3.2837	3.26617	3.31338	3.30221	3.32246	3.19979	2.98481	3.09596	3.46689	3.39303	3.26438	3.25827	3.14749	3.46891	3.57384	3.24112	3.16357	3.05086	3.155	3.39192	3.28429	3.02433	3.41241	3.3439	3.10475	3.43664	3.06474	3.20429	3.34885	3.06571	3.26984	3.37882
STARD13-AS	4.02689	3.84443	4.10561	4.04537	4.28343	4.16744	4.3588	4.00264	3.92443	3.9784	4.1199	4.20068	4.25812	4.07025	3.98781	3.88874	4.1049	4.217	3.56418	3.93995	4.00888	4.09055	3.94626	3.9747	4.05745	4.16331	3.83082	4.12597	3.82216	4.82265	4.16218	3.92464	4.13499	4.21276	4.0308	4.00412	4.00375	4.53033	4.39487	4.2369	3.79141	4.05745	4.03621	4.1399	4.23628	4.23869	3.77132	3.53905	4.17681
PRICKLE2-AS3	3.44577	3.29692	3.74927	3.46039	3.85301	3.51805	3.37396	3.48286	3.56714	3.62741	3.44143	3.58986	3.6099	3.77383	3.64527	3.36004	3.30386	3.84	3.45816	3.46265	3.30404	3.60852	3.42996	3.26692	3.50596	3.66618	3.52958	3.31318	3.34712	3.654	3.52333	3.15047	3.22693	3.38832	3.53519	3.31733	3.46665	3.51734	3.17112	3.28621	3.29122	3.6691	3.49021	3.59393	3.1774	3.30517	3.51193	3.36139	3.5173
LINC00853	4.41494	4.17236	4.38517	4.64638	4.39038	5.00686	4.86749	5.15453	4.71055	4.48211	4.5921	4.51165	4.90233	4.56006	4.45741	4.72604	4.40328	4.88228	3.84413	4.55095	4.64091	4.40352	4.75549	4.51102	4.36173	4.5036	4.3966	4.19851	4.51098	4.3033	4.56477	4.0085	4.46939	4.77449	4.72018	4.56669	4.95956	4.54752	4.86156	4.71363	4.60591	4.51959	4.6008	4.60897	4.51969	4.65986	4.36424	3.84009	4.50906
ALMS1-IT1	4.89747	5.07751	4.91085	5.28698	5.4438	5.60399	5.34934	5.63549	4.93309	5.25227	5.22801	5.56882	5.43701	5.34842	5.34187	4.69037	5.25231	5.40987	5.10395	5.05159	4.79202	5.20737	5.37373	5.21757	5.19194	5.2678	4.51237	5.09517	4.81451	5.60228	5.12635	5.7076	5.58147	5.35699	4.91443	5.27514	5.11692	5.31654	5.26484	5.30717	5.28644	5.27703	4.96747	5.55272	5.07598	4.92134	5.14327	5.17922	5.01861
BANCR	5.612	5.44898	5.56297	5.94625	5.07545	5.46997	5.4316	5.1885	6.36537	5.89713	5.39995	4.74447	6.0013	5.40374	6.10561	5.80051	5.48853	4.69445	5.48355	5.33896	6.54271	5.85263	4.97768	7.05881	5.84085	5.64095	5.72452	4.93229	5.35322	7.133	5.22627	5.01467	4.8602	6.07684	6.30099	4.89641	5.5258	5.08745	5.81508	5.90591	4.89606	5.96469	5.92258	4.87967	5.10196	5.92564	6.39377	5.5172	5.35105
LINC00348	2.76661	2.9889	2.84343	2.82866	2.68367	2.92239	3.15761	3.07554	2.80454	2.79663	2.83421	2.89272	3.22602	2.77378	2.91283	3.10904	2.74681	3.06019	2.88642	2.78428	2.83837	2.82503	2.94997	2.64768	2.83777	3.12456	2.83064	2.69912	2.72225	2.96893	2.70999	2.74158	2.77871	2.84287	2.77836	2.89237	2.71913	2.70699	2.91684	3.16374	2.62471	2.84666	2.70152	2.80006	2.84726	2.72417	2.61562	2.88831	2.81882
LINC00911	3.75157	3.26457	3.68519	3.72153	3.5797	3.62888	3.48459	3.73976	3.74419	3.8859	3.9382	3.62328	4.03924	3.96721	3.64928	3.9237	3.70277	3.7938	3.69966	3.62934	3.58129	3.81073	3.70855	3.52709	3.76131	3.73553	3.4309	3.48403	3.42186	3.62347	3.48301	3.3979	3.46849	3.6264	3.53039	3.57324	3.46962	3.66326	3.38518	3.66972	3.37902	3.66092	3.72157	3.64505	3.70036	3.73459	3.54964	3.70277	3.62943
CTXND1	6.25971	5.92218	6.18227	6.29991	7.08704	6.20935	6.58785	6.56377	6.67264	6.71255	7.14896	5.77262	6.89138	6.18954	6.16199	6.41381	6.57094	7.13597	5.71938	6.45259	6.70693	6.21265	6.01838	5.85509	5.76978	6.72987	5.72399	5.98749	5.94435	5.85485	6.40643	5.96231	6.38118	6.49352	6.59698	6.36204	7.12976	6.64424	6.13706	6.24808	6.2375	5.80527	5.86942	6.40155	5.92175	6.30101	6.59049	5.30639	6.45494
ITPR1-DT	4.75841	4.16763	5.30122	4.5644	4.45643	5.11456	4.97085	4.92619	5.06212	4.87167	4.73256	4.83226	4.60711	4.16693	4.20747	4.57173	4.43023	4.89257	4.46407	4.78731	4.364	4.98528	4.28702	4.97632	4.98439	5.2644	4.44089	4.77523	5.07514	4.42881	4.69087	4.3898	4.99566	4.81844	4.82376	4.58361	4.33003	4.498	4.81529	5.18576	5.18799	4.45418	4.37971	4.35826	4.95309	4.47173	4.85067	4.51801	4.73657
LINC01981	2.71724	2.76026	2.8573	2.76979	2.84452	2.82432	2.80131	2.83671	2.75742	2.71179	2.78786	2.94314	3.05272	2.8294	2.80449	2.77729	2.83476	2.87229	2.85298	2.76818	2.90499	2.73877	2.99263	2.57663	2.65983	2.85266	2.9313	2.81062	2.99859	2.64383	2.62377	2.79303	2.82684	2.73497	2.72092	2.59774	2.69273	2.69773	2.95308	3.41372	2.6844	2.76572	2.79853	3.11967	2.92064	3.189	2.57529	2.8946	2.82296
ADAM8	6.37743	7.1335	6.49331	6.7807	6.91631	6.78079	6.55243	6.5682	6.67893	6.62884	6.73602	6.83062	6.31568	7.1556	6.30596	6.52002	6.78799	6.70008	6.80355	6.40627	6.64513	6.60588	6.26768	6.39467	6.41076	6.30769	5.8988	6.34667	6.65924	6.96379	6.88694	6.56892	6.44158	6.42051	7.18273	6.56559	6.77368	6.79394	6.49349	6.50398	6.30031	6.3141	6.69454	6.46436	6.41307	6.55356	6.90045	6.93425	6.49866
CDH12	3.04193	3.08108	3.35112	2.87726	2.98964	3.0606	3.11913	3.01888	2.94499	3.38523	3.00177	3.15397	2.766	3.23681	2.87502	3.05435	2.92087	2.97774	2.88674	3.0626	3.1562	3.14979	2.96549	2.91895	2.93294	2.99828	3.11426	3.07346	3.25289	3.06194	3.05766	3.16629	2.96873	2.9656	2.9163	3.06614	3.07517	3.09508	3.07395	3.23245	3.43309	2.96539	3.00509	2.88626	2.72474	2.9794	3.59854	2.89156	3.04902
TSPAN2	6.83596	6.05342	5.99805	6.09981	6.49855	6.27081	5.84538	5.44964	5.86224	5.96906	6.00509	6.38138	5.95352	5.68	5.92063	6.02626	6.68331	6.16839	6.15739	5.96807	6.28703	5.97859	5.96785	4.90448	6.24282	5.36421	5.2087	5.76157	5.84615	6.09731	5.96844	5.42373	5.91756	6.41635	5.94207	5.91941	6.09919	6.01364	5.97263	5.07092	6.19758	6.09538	5.89778	5.90413	5.88336	6.12334	5.97097	5.95391	6.04952
TSPAN1	8.95517	9.44735	8.62967	7.93602	9.39181	9.4905	10.2543	8.60863	8.65028	10.8208	9.28482	9.15417	9.14063	10.0656	9.58844	9.5184	9.34925	7.88855	11.6065	11.1423	10.7207	8.5897	9.92021	10.6482	9.09207	10.2179	11.2172	9.69096	10.3404	9.87625	10.9213	9.86598	8.44314	8.5875	8.2913	8.94183	9.65744	8.63329	7.37394	8.49955	11.3323	10.4653	10.1085	8.72128	9.11081	10.6406	11.9269	11.4279	11.0608
PPIF	9.1564	9.29089	8.1853	8.70012	8.86994	8.49781	8.19325	8.409	8.18026	7.78172	8.35566	9.19651	8.59633	9.76916	8.31642	8.57051	8.87939	8.38641	9.24365	8.50529	8.70986	8.61167	8.1367	7.89163	8.10058	7.51841	8.57455	8.63202	8.40128	9.67894	8.87429	9.21944	8.3461	7.30373	9.37441	8.70238	8.64068	8.03232	8.21095	8.55309	8.77118	8.74557	8.70263	9.65373	8.84491	8.42367	8.28855	9.31295	8.55018
ACTR3-AS1	4.51292	4.32075	4.71487	4.73373	4.28842	3.80982	4.19004	4.30221	4.54533	4.37721	4.14893	4.08412	4.30537	4.39583	4.66446	3.96099	4.1759	4.01462	3.8473	4.30043	4.0494	4.20191	4.29062	3.64848	3.81074	4.59092	4.26047	4.14232	3.9706	4.15314	4.28915	4.2704	4.17016	4.21783	4.13562	3.97021	4.54873	3.90081	4.23965	4.34877	4.5599	3.94134	3.65857	4.22893	4.93012	4.35047	4.13211	3.8225	4.36814
ZNF891	4.94212	5.13835	5.07341	4.80456	4.83076	5.20715	4.84373	4.76931	5.09285	5.01733	4.40801	4.8692	4.57211	4.58907	4.7417	4.72049	4.96439	4.95399	4.84282	4.90015	5.15864	4.98905	5.2066	5.52923	5.13984	5.09627	5.17037	5.15729	5.04412	4.13503	4.85661	5.75836	5.21102	5.43132	4.87675	5.55167	4.99128	5.2189	5.6726	4.60144	5.017	5.41143	5.00409	4.6928	5.03412	5.11638	5.29068	4.87821	4.92841
FOXP4-AS1	4.24986	5.33987	4.98091	4.20782	4.46677	5.31618	4.86323	4.83594	5.83187	5.25102	4.51475	5.15015	5.10964	5.10507	5.03813	4.60033	5.13769	5.70126	4.85269	5.48166	5.68672	4.84166	5.14161	4.81534	4.81449	5.79313	5.75839	5.73558	5.14907	5.99291	5.3416	5.6086	4.93668	4.99753	5.13945	5.17292	5.04938	6.89824	5.07139	5.04234	4.65683	5.41369	5.82609	4.27271	5.14205	5.13297	5.09013	4.90765	5.63181
SNTG2-AS1	4.28907	4.10079	4.44618	4.64133	4.22119	4.46652	4.0582	4.68122	4.21326	4.36827	3.91305	4.32642	3.92401	4.45771	4.11323	4.66329	3.94092	4.62103	4.38861	4.31069	4.20214	4.85269	4.00069	4.16832	4.92937	4.01762	4.71013	4.29801	4.11046	4.36777	4.0925	3.92378	3.61288	4.34722	4.71086	3.86296	4.22077	4.42945	4.90536	4.43658	4.1168	4.38598	4.25333	4.87927	4.37373	3.88981	3.88754	4.59426	4.21736
KIF20A	5.97575	5.10257	5.55596	5.17161	5.71752	5.16265	5.24166	5.4795	5.85844	5.08709	5.12683	5.32496	5.09909	5.69491	7.40072	6.65329	9.15113	5.62221	5.65092	5.11506	7.02841	5.23693	7.2034	5.70337	5.78325	4.67226	6.99254	4.71768	6.10283	5.68753	5.94702	5.18291	5.51236	4.47093	5.82504	6.44675	7.18953	6.46274	6.92358	6.67774	7.77418	5.88075	5.45667	5.4031	7.24592	4.4911	4.80381	5.60789	5.08374
CDH13	9.09931	8.06031	7.65751	8.53235	8.69275	8.08737	8.6414	9.00092	9.14592	8.12095	8.72134	8.77061	9.01119	9.69919	8.66544	8.21605	8.85792	8.31864	7.666	8.6881	8.7234	8.53809	9.21406	8.29219	8.8505	8.54728	7.28658	8.11557	7.95838	8.53762	8.66149	8.5194	8.88145	8.67968	7.54377	9.38621	8.08969	8.81408	8.93131	6.70076	9.16112	8.57985	8.22857	8.6403	7.6366	9.16232	8.66332	7.58437	8.64409
ARL4C	8.92917	7.78104	8.43974	8.71738	8.74748	8.46598	8.20564	8.41051	8.12878	8.6168	8.25896	8.47489	8.10942	8.60744	8.43286	7.72618	7.81096	8.28848	9.64609	7.65868	8.41219	8.15045	7.93284	8.75106	8.3501	8.36778	8.74763	7.97365	8.66458	8.95142	8.44314	7.71246	8.18471	8.36541	8.5232	7.55935	8.04339	7.89641	8.58286	8.46541	8.27454	8.1288	8.11572	8.8545	8.8138	7.84712	7.94947	9.76131	7.8875
NPTN-IT1	6.80671	6.15415	6.28956	6.06145	6.42228	6.06756	6.82387	5.62529	6.23267	6.446	5.63835	6.43071	6.38371	6.59137	5.27624	6.37596	6.21561	6.30416	5.7284	5.69993	6.02968	6.78113	5.6432	5.9672	6.32307	6.22122	5.73353	5.84473	6.5038	6.32233	5.93937	6.16584	6.3106	5.62343	6.91868	5.8873	6.11449	6.05237	6.78665	6.47286	6.50522	6.13808	6.05114	6.69101	6.25928	5.29644	6.12716	5.65882	5.68627
RASGRP1	7.63817	7.36582	6.93705	8.36212	7.82647	7.99945	7.1361	7.17994	5.78864	7.23649	7.22884	7.81453	6.54221	7.67059	7.21449	6.8192	7.34598	7.44851	8.51351	6.33703	7.50709	7.51601	6.44243	7.13156	7.1419	7.39178	7.16571	7.10954	7.45323	8.9626	7.65651	6.18198	7.46539	6.9946	8.57619	7.94576	7.2902	6.78695	7.10756	7.96631	6.77948	6.52571	6.62605	8.91066	7.1419	6.83062	6.62113	8.62816	6.38358
NAMPT	11.1926	11.4028	11.1056	11.5166	11.4784	11.0623	10.439	10.9195	10.4806	10.4174	10.3702	11.7317	10.9534	12.3397	10.3925	11.2888	11.0056	11.0672	10.7328	10.436	10.5078	11.2243	9.98256	9.5108	11.0418	10.3313	9.70121	10.9222	10.8023	12.0345	10.7947	10.3971	10.2787	10.4052	11.3925	10.6357	10.467	10.5202	10.1651	10.1565	10.5461	11.0012	10.5377	12.049	11.049	11.4474	10.8644	10.6772	10.0136
LINC01587	3.70309	3.84482	3.711	3.59849	3.9315	3.66993	3.5778	3.69892	3.66064	3.46973	3.97432	3.70739	3.92022	3.57739	3.84787	3.68224	3.72484	3.53878	3.47716	3.72262	3.76413	3.51451	3.88598	3.42162	3.94063	3.76797	3.85108	3.67398	4.05118	3.80558	3.52067	4.14728	3.61556	3.27682	3.63798	3.81542	3.68064	3.52845	3.55625	3.4271	3.74328	3.70786	3.99604	3.57552	3.65611	3.76694	3.5879	3.43935	3.79171
FAM13A	7.51525	7.58736	8.94578	7.88689	7.61016	7.99386	8.09096	8.27947	8.12238	8.30532	7.94635	7.09385	7.93134	7.64446	8.33815	7.79915	7.85058	7.68466	8.5871	8.47407	8.34669	8.25695	8.25012	8.76858	8.08296	8.84222	8.87043	8.13921	8.57346	7.36547	8.02279	7.87725	7.71419	8.16356	7.62684	7.78973	7.97196	8.37671	7.84089	8.41202	7.77288	8.35811	8.4828	6.84678	7.79181	7.44274	8.37992	8.48398	8.38439
EBI3	6.50338	6.85604	6.07699	6.12418	6.30784	6.20252	5.99819	6.44138	6.64848	6.44219	6.82943	6.46192	6.42501	7.21084	6.27546	6.78327	5.93313	6.7342	7.6478	6.41192	6.64302	6.27924	6.28366	6.69924	6.33741	6.56393	6.50439	6.80331	6.85093	6.02653	6.67526	6.05026	6.54162	6.48277	6.88706	7.55106	6.8424	6.59596	6.89675	6.20449	6.45395	6.99229	7.35566	6.51243	6.54892	6.33596	6.56878	7.65929	6.42483
ADGRG2	6.3249	6.45394	5.09404	5.87005	6.23603	6.30017	6.68722	6.75809	7.51885	5.44407	6.19319	7.181	6.07681	5.74722	6.99297	7.34351	7.36701	6.14262	4.88356	6.01058	7.25677	6.03708	6.46663	6.22586	6.5436	5.2383	7.30739	5.61926	5.7558	6.20313	6.98145	6.17773	6.30706	5.762	7.10065	7.33721	7.70576	5.33702	6.55228	5.75223	5.56961	6.3449	6.01017	5.42566	6.81715	5.42532	6.40902	4.88357	6.03235
CDH17	4.52011	4.04816	4.44236	4.27355	4.45626	4.4454	4.33687	4.34467	4.26681	4.44295	4.3533	4.1371	4.27346	4.26239	4.52795	4.2316	4.29954	4.27346	4.41908	4.54618	4.26792	4.046	4.36005	4.41307	4.09798	4.31744	5.10099	4.00992	4.2425	4.14108	4.07583	4.05175	4.1671	4.05504	4.23742	4.03702	4.33067	4.15507	4.29285	4.74904	4.16777	4.35868	4.12942	4.3169	4.42047	4.1671	4.19372	4.53238	4.5986
PLXNC1	6.29777	6.77444	6.00849	6.65011	6.75991	6.31743	5.95835	5.8056	6.31351	6.4541	6.32731	6.45139	5.88116	6.73436	5.74484	6.07582	7.00622	6.37756	6.73685	6.09687	6.64376	6.09478	6.02755	6.10775	6.34862	5.64928	6.1212	5.97344	6.8852	6.47718	6.77196	6.16363	6.25257	6.11635	6.61228	6.86601	6.47261	6.41881	5.77195	6.11694	6.12961	6.37203	6.50955	6.07813	6.03937	6.6499	6.85156	6.82565	6.14931
PDZK1IP1	8.62737	9.56095	8.59966	9.39258	8.61761	9.30767	10.4443	8.92224	9.21709	8.91908	8.83928	9.53999	9.04065	10.1292	8.64329	9.10973	9.31185	9.2472	8.10893	8.73757	9.17978	8.83991	9.32231	8.39305	9.49085	9.14956	8.56296	9.67638	8.37951	9.29753	9.62032	8.48986	9.05024	9.14874	9.18134	8.88902	8.90781	9.51581	9.01216	9.62447	9.14791	8.79927	9.82528	9.94784	8.48123	9.59558	8.89436	8.14865	8.77825
CHST4	4.92327	5.24522	4.31758	4.8897	4.53183	4.535	4.7315	4.58481	4.48747	4.772	4.72302	4.74388	4.64759	4.65798	4.75278	4.52135	4.74981	4.60197	4.63496	4.50687	4.73391	4.62824	4.95574	4.6264	4.30733	4.99993	4.80334	4.49718	4.90699	4.6492	4.65116	4.32599	4.6203	4.36788	4.88561	4.91072	4.96643	4.82982	4.4846	4.55382	4.6172	4.70219	4.86329	4.83861	4.25741	4.55233	4.17147	4.71446	4.5176
BLACAT1	4.51354	4.90603	4.6531	4.45933	4.58906	4.63545	4.8374	4.55849	4.27589	4.28984	4.71269	5.49644	4.68082	4.85789	4.15856	4.68088	4.60616	5.0439	4.58116	4.93442	4.66538	4.81358	4.48554	4.90311	4.90014	4.77313	5.07615	4.70951	4.87682	6.04921	4.56655	4.68331	4.69502	4.60954	5.06108	4.40602	4.47196	4.40549	4.42338	5.01934	4.42526	4.73959	5.1047	5.12861	4.97742	4.73211	4.65392	4.41223	4.83892
DHRS9	7.47288	8.39261	7.75069	8.75254	8.30007	7.87677	7.4494	7.53627	7.85444	7.29513	7.21308	8.38711	7.27559	8.40664	6.97631	7.61846	8.66071	7.63779	9.17268	7.70737	8.75702	7.82237	7.845	8.22954	7.74141	7.75701	8.02451	7.68773	8.63277	8.5817	8.41107	7.71399	8.0198	7.77367	8.07965	9.00588	8.0791	8.46097	7.93634	8.56808	8.40619	8.23765	7.87041	8.74587	7.53305	8.04579	8.32454	9.28546	7.71778
CAPN10-DT	4.69471	4.74238	4.13122	4.05371	4.16735	4.22503	4.44295	4.62159	4.57419	4.22293	4.43925	4.52453	4.38519	4.5127	4.26694	4.252	4.14702	4.1921	4.29267	4.48938	4.60059	4.34957	4.21371	4.35734	4.36537	4.44763	3.91127	4.46964	4.17728	4.43658	4.20542	4.32395	3.95963	4.03052	4.44791	4.15766	4.24997	4.06278	4.43396	4.50404	4.72363	4.35414	4.62438	4.15065	4.26224	4.61391	4.57444	4.36385	4.47417
LOC101926892	3.28782	3.24348	3.22836	3.30175	3.06371	3.76802	3.26697	3.24192	3.11676	3.36008	3.22259	3.31468	3.42778	3.2552	3.82657	3.36454	3.28699	3.0833	3.60901	3.29028	3.65	3.54612	3.1119	3.41442	3.27821	3.30578	3.27888	3.3712	3.36358	3.18859	3.14354	3.30335	4.2952	3.89208	3.47116	3.25745	3.04678	3.23714	3.16203	3.60677	3.2557	3.44345	3.64619	3.48407	3.43894	3.46021	3.42256	3.69698	3.29455
SLC16A12-AS1	4.33569	4.95786	4.39626	4.54081	4.08326	4.63699	4.11815	4.42352	3.8304	4.15567	4.51326	4.20355	4.20723	4.20402	4.5958	4.30101	4.2993	4.38061	3.73608	4.25871	3.67222	4.41425	4.24038	4.13965	4.84094	4.52062	4.05735	4.60039	4.1324	4.62543	4.25996	4.15581	4.25356	4.27904	4.25646	4.0729	4.00359	3.86136	4.48354	4.80915	4.24295	4.27542	3.8676	4.47497	4.61531	4.42403	4.06121	3.92813	4.32155
LOC101926944	6.56107	7.2402	7.39615	5.81581	6.22412	6.02367	4.31617	6.34068	7.3371	6.86209	5.87438	6.44746	6.84994	6.54609	5.60901	6.13875	6.48155	6.63137	5.84493	6.28308	5.87987	7.11868	7.06834	6.77767	6.37851	6.56355	5.47054	6.51216	6.44181	6.74899	6.37849	7.08276	6.60697	7.22205	6.98666	6.98901	6.40622	6.79277	6.87107	6.38823	5.02775	6.23637	5.98998	5.17868	6.64994	4.51822	6.12348	5.8508	6.26879
LOC101926960	2.38078	2.59916	2.83078	2.51361	2.72034	2.50915	2.62595	2.59278	2.55445	2.61966	2.66905	2.45536	2.94458	2.57889	2.35696	2.53306	2.49919	2.66728	2.58174	2.65474	2.477	2.6641	2.67455	2.73365	2.71219	2.87591	2.59269	2.62096	2.46879	2.58739	2.45611	2.53658	2.54498	2.4844	2.66599	2.54583	2.42338	2.53805	2.63923	2.43598	2.82636	2.66722	2.54482	2.63675	2.69233	2.56449	2.48795	2.566	2.82574
LINC01844	3.9913	4.35487	4.37283	3.99884	4.15819	4.07503	4.2433	4.31583	4.37129	4.2092	4.41416	3.99777	3.53634	4.46423	4.2115	3.99884	3.83324	4.44505	3.86781	3.89778	4.06011	4.78709	4.32682	4.36298	4.10973	4.44299	3.99899	3.96377	3.93745	3.98567	3.73834	3.79605	3.84357	4.34854	4.15581	4.11943	3.78869	4.15329	4.1739	4.43395	3.80704	4.4147	3.90594	4.47498	4.43025	4.03331	4.19088	3.96567	3.88274
LOC101927018	2.82982	2.60689	2.76507	2.83039	2.86242	2.79991	3.01785	2.80248	3.06283	2.82632	2.89219	2.87886	2.98318	2.7712	2.91223	2.84806	2.66094	2.85447	3.07244	3.05884	2.71844	3.05909	2.79152	2.84937	2.68031	3.38552	3.06387	2.92209	2.72863	2.98698	2.75488	2.77663	2.87833	2.97557	3.00758	2.8531	2.60496	3.22613	2.74543	3.00051	2.73179	2.93194	3.02694	2.95645	3.06821	2.82035	2.90291	3.02802	3.14279
ROR1-AS1	2.78904	2.65539	2.93387	2.78264	2.62789	2.69666	2.76661	2.74813	2.66475	2.57286	2.88632	2.80517	2.86583	2.97873	3.143	2.61928	2.6893	2.74526	2.98771	2.80933	2.74144	2.65734	2.6723	2.73861	2.95208	2.83334	2.6137	2.69831	2.80467	2.80995	2.96167	2.78104	2.86117	2.64516	2.59248	2.61893	2.8188	2.88628	2.9414	2.86384	2.93337	2.79722	2.67493	2.9057	2.93837	2.66999	2.79255	2.99831	2.82094
LOC101927069	5.99561	5.94908	4.52894	5.41131	5.15495	5.66032	5.44106	5.6669	5.31422	5.62757	5.33812	6.5753	5.30494	5.70303	4.49836	4.23303	5.02983	6.59863	3.78424	4.85376	5.62913	5.41489	5.83276	5.56981	5.87768	5.51623	4.04674	5.13134	5.74269	5.52059	5.7105	3.96515	4.43513	7.05064	6.19216	7.20417	5.92256	5.47998	5.25407	4.05537	5.42224	5.67092	5.10089	5.43913	5.61904	5.90785	5.61543	3.37939	5.20759
LINC00682	2.89774	3.03004	3.22578	3.27174	3.24273	3.09828	2.98128	3.03049	2.9183	3.16339	3.03349	3.08879	3.02447	3.14371	3.12673	3.29278	3.0804	2.99458	3.15549	3.16478	3.14917	3.39867	3.53052	3.12747	2.93471	3.44642	2.98022	3.05369	3.11364	2.92769	3.06924	2.78584	3.10603	3.19275	3.12693	3.01006	3.07983	2.88046	3.20029	3.42074	3.01696	3.268	3.11399	3.28529	3.00531	3.14363	2.99262	3.20924	3.2064
MIR4307HG	3.46127	3.45801	3.36304	3.45832	3.60863	3.27861	3.48369	3.46495	3.06132	3.33802	3.08195	3.31001	3.49664	3.53677	3.14705	3.21843	3.31344	3.43248	3.38955	3.39087	3.34201	3.20983	3.33238	3.16673	3.3244	3.81281	3.25434	3.50471	3.29233	3.32077	3.22833	3.36156	3.6092	3.2321	3.77363	3.2425	3.1804	3.10755	3.40972	3.70902	3.43169	3.41509	3.47504	3.28875	3.24639	3.301	3.29209	3.40529	3.41686
LINC02016	3.52582	3.34683	3.57616	4.69655	3.54052	4.03802	3.78169	4.08081	3.32552	3.28597	3.14698	3.45881	3.59321	3.81424	3.53364	3.38525	3.24656	3.87497	3.3188	3.50956	4.00081	3.2774	4.52842	3.56309	3.57616	4.30339	3.1647	3.67106	3.67569	3.58806	3.81277	3.16046	3.36617	3.39368	3.27309	4.71234	3.77255	3.70431	3.42099	3.94474	3.23389	3.15219	3.71016	3.72518	3.26036	4.21319	3.83637	3.37871	3.48835
FAM111A-DT	6.42629	6.72148	6.89569	6.46652	6.5012	6.84169	7.12002	6.90941	7.16679	6.95655	6.80205	6.63702	6.68321	5.92475	6.95308	6.7123	7.11863	6.85976	6.64047	6.89349	6.88038	6.95907	7.12398	7.17286	7.26193	7.38883	6.99605	6.9029	7.1067	6.46498	6.79926	6.7899	7.12833	7.05051	6.67977	7.23023	7.05907	7.06364	7.43234	7.08084	6.82405	7.01236	6.18767	6.37096	6.95754	6.08874	6.91962	6.63411	6.87568
HNF4A-AS1	2.86562	2.85803	2.82439	2.97285	2.71912	2.81	2.70748	3.01548	2.66706	2.66674	2.72092	2.75183	2.70675	2.72319	2.70051	3.26333	2.74075	2.68308	3.02274	2.81647	3.04141	2.6786	3.03262	2.74458	2.53456	2.61285	2.61087	2.79767	2.50035	2.84893	3.00649	2.67874	2.78502	2.79754	2.83814	2.70487	2.71554	2.6471	2.55749	2.97938	2.77421	2.80045	3.02555	2.82287	2.85043	2.89599	2.82209	3.05199	2.86807
DEPDC1-AS1	2.80898	2.69354	3.03114	2.71284	2.74276	2.59448	2.69383	2.54778	2.71284	2.59723	2.94417	2.52753	3.1401	2.77694	2.91589	2.73463	3.09193	2.66386	2.8205	2.77337	2.83616	2.5331	2.65576	2.61906	2.70358	2.85425	2.70892	2.75183	2.46099	2.89162	2.75387	2.67261	2.69575	2.42707	2.52221	2.68008	2.76872	2.95614	2.90156	2.93525	2.57371	2.70451	2.6581	2.8252	2.75161	2.7333	2.93095	2.87041	2.75872
LOC101927237	3.05887	2.88285	3.35207	3.32139	2.92554	3.213	3.17727	3.37539	2.94985	3.04162	3.12569	3.07282	3.42949	3.07339	3.03537	3.11904	3.75677	3.33261	2.71565	3.22099	3.35462	3.28878	3.11253	3.15474	2.97633	3.12821	3.2051	3.08532	3.10838	3.05236	3.19774	3.00345	3.14683	3.23022	3.07048	3.02443	3.29622	3.13959	3.20302	3.32864	3.13925	3.36106	3.24844	2.92685	3.33782	3.04602	3.15751	2.71041	3.2363
PDZRN3-AS1	5.08726	4.99471	4.6018	4.79731	5.36911	4.95565	5.01555	6.83208	5.44863	4.7622	5.17825	5.02908	5.19634	4.95765	5.28573	5.39593	5.2202	4.82931	4.39322	5.50773	5.05697	4.91864	5.07208	4.89896	4.97222	4.97694	5.44641	5.25906	4.93388	4.67851	5.06538	4.9737	5.78264	4.93009	4.83377	4.86842	5.31184	4.95955	5.1477	5.08433	4.99057	5.05689	5.9305	4.77493	5.09071	4.70538	5.49209	4.36112	5.54989
LOC101927272	5.43498	4.13658	4.56553	4.8348	4.63247	4.29444	4.77926	4.71891	4.56361	4.23737	4.28936	3.91551	4.32255	5.08659	4.28358	4.7885	4.34617	4.23236	4.50813	4.18207	4.17008	4.5438	4.34928	4.27486	4.33695	4.33855	5.45482	4.32268	4.23402	4.2019	4.38459	4.20185	4.30908	4.5827	4.6591	4.25383	4.47275	4.44778	4.10077	4.30542	4.51931	4.6093	4.26234	4.6312	4.4394	4.25296	4.71072	4.54793	4.23819
NDUFV2-AS1	5.88835	5.71131	5.97931	5.97376	5.9166	5.77558	5.56215	6.22701	5.68982	6.06449	6.16234	5.99633	5.98389	6.22622	5.85249	6.18273	5.82038	5.94544	5.58409	5.81762	5.51937	5.91461	5.71818	5.63531	5.54512	5.74776	5.07296	5.55089	5.69011	6.06435	5.93883	5.44779	5.99074	6.28986	6.41341	5.59653	5.72334	5.73347	5.7155	6.11785	5.86311	5.48811	5.74522	6.20534	5.62559	6.31886	5.69981	5.77537	5.75554
EP300-AS1	8.99952	9.12045	8.79954	9.19043	9.02145	9.09796	8.9784	8.84918	9.09648	9.95791	9.04538	8.97407	8.82273	7.81638	8.50412	9.8011	9.69623	9.12442	9.52329	9.2718	9.36172	9.22835	8.66167	8.5694	8.88496	9.7952	7.96104	8.55752	9.56365	9.76735	9.43601	8.89503	8.65968	8.9884	9.62568	9.2518	9.78559	10.5139	9.14057	8.25272	9.41304	8.20852	8.60118	7.75951	8.93499	9.72884	9.26676	9.59856	9.31844
LINC02395	2.73608	2.82411	2.8474	3.13371	2.93903	2.98763	2.71885	2.54668	2.6633	2.78061	2.91849	2.70167	2.80932	2.85849	2.77933	2.77219	3.0273	3.16609	2.73712	2.7076	2.74155	2.98676	2.78512	2.72275	2.87915	2.75042	2.96182	2.80177	2.97098	2.65634	2.85783	2.89754	2.44348	2.82971	2.69974	2.88965	2.97118	3.16082	2.90919	2.90211	2.54093	3.13198	2.77998	2.75408	2.76375	2.89743	2.95337	2.79953	2.81777
LOC101927310	2.88592	2.76037	2.85943	2.97495	2.69575	2.66712	2.77683	2.87629	2.42855	2.58905	2.65969	2.633	2.86343	2.69816	3.00836	2.77171	2.67058	2.70589	2.40553	2.88517	2.69935	2.70813	2.94313	2.9206	2.63838	2.84155	2.68634	2.73401	2.6307	2.68006	2.89107	2.77088	2.6271	2.63132	2.82097	2.70004	2.56423	2.78074	2.74858	2.60395	2.63046	2.66962	2.70088	2.63823	2.58205	2.6641	2.48188	2.50534	2.91239
LOC101927314	2.73059	2.82021	2.5948	2.39824	2.47395	2.5976	2.63918	2.77704	2.55241	2.68213	2.50358	2.76305	2.75652	2.74387	2.73478	2.6376	2.5536	2.68578	2.59471	2.70527	2.55555	2.71007	2.52145	2.73788	2.66946	2.80568	2.66933	2.72038	2.50296	2.7514	2.66099	2.45504	2.70288	2.4566	2.60168	2.60621	2.6718	2.68593	2.69487	2.60188	2.75351	2.68205	2.74072	2.48547	2.62904	2.5366	2.69427	2.66017	2.69623
LINC02186	3.12507	3.56168	3.43215	3.39637	3.64475	3.04703	3.49623	3.2798	2.9474	3.24677	3.35721	3.11098	3.29704	3.43847	3.30096	3.47024	3.08086	3.37972	3.04537	3.31069	3.34516	3.53718	3.47032	3.17628	3.43215	3.41677	3.2971	3.27403	3.4328	3.53217	3.09193	3.42544	3.3542	3.31069	3.37994	3.26961	3.14693	3.22933	3.50533	3.37092	2.98198	2.98627	3.18964	3.45382	3.71122	3.35963	3.37152	3.16784	3.27462
LOC101927358	2.69986	2.96376	2.87902	2.84017	2.80337	2.82841	2.66119	3.10938	2.63035	2.76663	2.73574	2.76998	2.93296	2.79191	3.10488	2.94806	3.08928	2.76145	2.58244	2.76353	2.92853	2.74559	2.69541	2.90199	2.79219	2.89069	2.71674	2.86367	2.97371	3.12519	2.67618	2.969	2.75041	2.66277	2.93343	3.00082	2.53021	2.68156	2.89368	3.44037	2.65948	2.80195	2.79504	2.64367	2.87372	3.07388	3.04658	2.64458	2.80674
LINC02353	2.74545	2.9341	2.91785	3.0642	2.8676	2.81222	3.05013	2.98856	2.65894	3.11693	2.99257	2.9312	2.87578	2.80649	2.87681	2.95126	2.64207	2.80078	2.59695	2.95434	2.81549	2.74164	2.92164	2.99809	2.66639	2.91797	2.88105	2.89206	2.91982	2.90414	2.75131	2.85767	3.0981	2.96062	2.63055	2.9921	2.8223	2.80784	2.75855	2.72157	2.89761	2.92634	2.72357	2.82199	2.89537	2.80614	2.87757	2.656	3.02983
LINC01514	2.98299	3.26074	3.02224	3.04443	2.79756	3.00562	3.0386	2.92883	2.91354	2.91868	3.07218	2.78799	3.22705	3.43872	3.18515	3.126	2.96674	2.76938	3.00613	2.90666	3.06669	2.88168	3.26386	2.99446	2.83989	2.78904	2.86879	2.76735	3.08755	2.80376	2.75272	3.071	3.25138	2.95146	2.9326	3.04456	2.79509	3.12432	2.98123	3.09911	3.15455	3.10378	3.0265	2.99057	2.69238	2.91107	2.80197	3.04042	2.88894
SRGAP3-AS2	6.38708	7.20089	4.59378	5.12397	6.15826	5.59157	7.9119	5.93329	5.99297	8.49802	5.95678	6.99878	5.45123	7.74395	7.59346	6.91275	6.53926	4.90014	9.82804	9.4632	9.00725	4.96157	7.37422	8.92089	6.20463	8.18626	8.44668	7.58764	7.86924	6.80985	9.09409	7.57422	5.88797	5.73565	5.12583	6.53023	7.8041	5.43281	4.75555	4.76729	9.17733	8.46165	7.64458	5.44594	6.43718	8.18135	9.78986	9.79859	9.41063
TMEM108-AS1	4.8166	4.8198	4.9297	5.21003	5.0344	4.56552	4.64871	4.70819	4.76313	4.94128	5.06744	4.89119	4.98075	4.89951	4.71584	4.92107	5.05807	4.80133	4.88502	4.8323	4.71519	4.79081	4.65697	4.73019	4.80569	4.7532	4.8166	4.65535	4.7529	4.78187	4.80824	4.63807	4.68452	4.88247	4.69047	4.97382	4.78451	4.55038	4.91279	4.69281	4.64528	4.7379	4.95604	5.01205	4.59448	4.58289	4.67775	4.92287	4.81628
HECW2-AS1	5.15381	2.97781	3.7755	4.05392	3.85789	3.83228	3.99602	3.4489	3.43903	3.68837	3.65467	3.29347	3.33015	3.74141	3.62461	3.14809	3.25765	3.47942	3.74451	3.54694	3.91728	3.70709	3.40217	3.8006	3.31953	3.49247	3.60158	4.1388	3.73677	3.97741	3.36057	3.06983	3.5121	3.56027	4.54973	3.70885	3.49035	3.31087	3.74287	3.76097	3.40563	3.53192	3.71443	3.92527	5.24745	3.6128	3.40337	3.76501	3.59649
LINC02620	3.24116	3.40833	3.30747	3.3386	3.15751	3.3258	3.13507	3.41094	3.19277	3.32074	3.12422	3.28881	3.38084	3.1881	3.39495	3.43512	3.3161	3.219	3.24239	3.41116	3.08973	3.34592	3.57396	3.15774	3.18921	3.81415	3.31504	3.17249	3.49134	3.38921	3.24575	3.12405	3.18783	3.28189	3.49223	3.23038	3.26216	3.3207	3.23065	3.29199	3.20283	3.39617	3.21872	3.27683	3.02517	3.14129	3.24321	3.19879	3.41092
LINC01186	5.52515	5.48444	4.79387	5.05574	5.08836	4.98838	5.4018	4.68033	5.27525	5.05905	4.9934	5.32948	5.37923	5.0069	4.98749	4.96754	5.2491	5.06311	5.08808	5.34502	5.45385	4.74845	5.14022	5.25955	4.81794	5.40944	5.12256	4.85054	4.98766	4.69311	5.31803	4.84392	4.97005	5.10135	4.88546	5.57694	5.32169	5.18529	5.05229	4.738	5.76164	4.97146	5.15454	4.95192	5.31729	5.53036	5.6254	5.06251	5.29759
DPP10-AS3	3.15837	3.39225	3.27471	3.70893	3.65725	3.58953	3.3589	3.42027	3.31598	3.50925	3.51321	3.22743	3.2604	3.58901	3.68378	3.29567	3.68886	3.227	3.24341	3.35099	3.2819	3.56592	3.74923	3.24257	3.62471	3.37221	3.22994	3.40542	3.16571	3.52909	3.03306	3.14052	3.28108	3.37876	3.17815	3.38516	3.36767	3.38564	3.21336	3.32212	3.31928	3.44491	3.26952	3.34817	3.09972	3.52289	3.2939	3.27147	3.35436
NCK1-DT	6.55525	6.51823	7.18105	6.40683	6.43445	7.53745	7.09467	7.68397	6.71439	7.09186	6.8772	6.25179	6.36825	5.98065	6.75714	6.8543	7.02097	6.90195	7.51701	7.36346	7.493	7.30554	7.16424	7.26087	7.2634	7.42446	7.18697	7.11974	7.26089	6.71971	7.24118	7.19539	7.16618	7.42131	7.36131	7.38983	6.68706	7.6682	7.41991	7.15199	7.12297	7.27699	7.06669	6.2285	7.01645	6.44082	7.39763	7.53491	7.33497
ZNF529-AS1	5.57283	5.34143	5.24407	4.79298	4.26523	5.07501	4.99162	5.08161	5.88381	4.9499	5.16932	5.12065	5.09058	4.91635	5.0412	4.78896	4.86632	4.75006	4.64083	5.58683	4.86023	5.54218	5.15153	4.96909	4.87228	4.73082	4.91915	5.13451	5.2724	5.06038	4.94806	5.34993	5.08008	4.83107	5.01559	4.94398	5.06475	4.91749	4.98433	4.98368	5.49328	4.61924	4.86332	5.01423	5.24365	6.02357	5.0587	4.55443	5.62264
LINC02126	5.70658	4.91564	4.87132	5.00536	4.7791	4.6746	4.26946	5.34152	5.32756	4.71162	5.09	4.61547	4.968	4.69967	5.04485	4.91154	5.45152	4.84953	4.71751	4.55828	5.15137	4.78625	5.14007	4.4588	4.66587	4.98914	4.8057	4.44249	4.9821	4.76249	4.87371	4.79364	5.18598	4.48457	4.93766	4.53197	4.48353	4.90749	4.72902	4.92455	4.86941	4.74442	5.07771	4.72013	4.76628	4.30668	4.71094	4.74769	4.6269
LINC02388	4.11139	4.2215	5.23886	4.60662	4.32698	3.98556	4.49204	4.42539	4.0738	4.30561	4.64964	4.21968	4.49585	4.19281	3.74833	4.15795	4.21561	4.75729	3.8701	4.05463	3.78566	4.67956	4.04682	4.15657	4.25174	4.18534	3.93534	4.12235	3.90845	3.89429	4.284	3.78343	4.05577	4.52805	3.92115	3.87687	3.78444	4.26354	4.0099	4.3109	4.09161	4.06133	4.46317	5.24897	3.98703	4.48221	3.61076	3.91143	4.08348
LOC101927657	3.12595	3.25308	3.0942	3.13988	3.35459	3.01546	3.15392	3.05628	3.00029	3.01565	3.09446	3.25058	3.27439	3.03977	3.11335	2.95923	3.0258	3.12192	2.77951	3.11144	2.93363	2.94781	3.36185	3.02668	3.09302	3.10607	2.90439	2.95578	3.0438	3.19821	2.9438	3.13989	3.27793	3.11069	2.9798	3.1256	3.24398	3.3679	3.29671	3.23335	3.17021	3.15768	3.15002	3.18487	3.0014	3.29774	2.94031	2.80661	3.18877
SMAD1-AS2	3.09309	3.15151	2.93937	3.00085	3.15356	3.17192	2.86761	3.10142	3.61417	3.10778	3.12395	3.0371	3.17369	2.90787	3.20287	3.11858	3.13879	3.0072	3.33267	3.20684	3.24228	3.00108	3.34545	3.26498	2.98438	2.99284	3.12096	2.98516	3.19487	3.16417	3.10138	3.13505	3.23683	3.23332	2.9931	3.16044	3.26649	3.20837	3.13022	3.42071	3.24807	2.94144	3.01193	2.94766	3.06041	3.28584	3.27843	3.38555	3.2517
ZNF793-AS1	5.28946	5.99765	5.67132	4.92772	5.4588	5.42551	5.62764	5.32409	6.30187	5.61942	5.99336	5.37146	5.57507	5.18451	5.47763	5.85863	5.66855	5.53492	5.81664	5.74577	5.80234	5.17581	5.46638	5.62798	5.83145	5.53565	6.7507	5.68678	5.85129	5.12818	5.98856	5.67106	5.72391	5.78413	5.37862	5.5281	6.00155	5.81952	5.19754	4.942	5.96884	5.32552	5.46091	4.62619	5.5372	5.47997	6.27203	5.89555	5.59577
MIR548XHG	3.22308	3.19683	3.0063	3.43753	2.8747	2.9942	3.39828	2.54717	3.01259	2.62823	2.81169	2.89999	3.06246	3.19894	3.1733	3.02163	3.22854	3.03246	2.8764	3.05473	3.20658	3.23755	3.12704	3.01346	3.02891	3.33642	3.42757	3.54528	3.22854	3.4475	2.87754	2.99229	3.19106	3.43987	2.80236	3.19886	2.56463	3.08792	3.30821	3.09777	2.94569	3.1197	3.28197	2.51734	2.9326	3.21603	2.69621	2.84193	3.14245
HMMR-AS1	3.52549	3.21745	3.5263	3.45349	3.45488	3.68039	3.35919	3.32657	3.50613	3.47977	3.63093	3.40933	3.53238	3.42381	3.77086	3.48564	3.64202	3.44314	3.53815	3.67101	3.3333	3.44013	3.79715	3.38076	3.60721	3.96861	3.36425	3.53605	3.52264	3.49238	3.17099	3.37979	3.52838	3.27252	3.4793	3.46874	3.5622	3.29341	3.68477	3.60921	3.61379	4.06845	3.54427	3.64313	3.52906	3.51011	3.48474	3.54285	3.60729
LOC101927972	2.87431	3.78672	3.10907	3.27246	2.90039	3.20694	3.73337	3.85145	3.30676	3.24583	2.93643	3.70274	3.70952	3.4324	3.27531	3.54326	3.10763	2.98585	3.17828	3.77129	3.26537	3.33157	3.14701	3.157	3.25704	3.32986	3.36604	3.88217	3.34095	3.17455	3.97032	3.68648	3.26623	3.10742	3.21545	3.38218	3.27897	3.33089	3.28343	3.60713	3.66175	3.52612	3.89748	3.35082	3.3413	3.30524	3.33047	3.16844	3.85891
TRDN-AS1	3.16886	3.43528	3.6645	3.46927	3.49745	3.38707	3.75794	3.35653	3.25447	3.37059	3.49039	3.23496	3.21722	3.32079	3.04185	3.15666	3.39018	3.59636	3.04725	3.50319	3.46712	3.59759	3.56028	3.35653	3.42227	3.45676	3.45003	3.13059	3.34244	3.34896	3.52238	3.2213	3.21236	3.7239	2.95525	3.35283	3.4213	3.3856	3.25063	3.85286	3.12442	3.62181	3.39346	3.04936	3.7305	3.53269	3.15353	3.09843	3.54331
LINC01087	2.70745	2.93848	2.97246	2.97553	2.68471	2.72806	2.66749	2.82501	2.97881	2.79122	2.73073	2.55806	2.92566	2.60328	2.95293	2.71264	2.66765	2.59717	2.70344	3.0602	2.84093	2.79322	3.01705	2.71433	3.09999	2.77203	3.00093	2.8237	2.67849	2.63685	2.68181	2.62937	2.69541	2.86744	2.96107	2.85106	2.73544	3.04688	2.67972	2.8258	2.83758	2.5135	2.78578	2.75985	2.88599	3.0118	2.89582	2.71091	2.70352
LOC101928068	5.11377	4.56005	5.42445	5.17481	5.1739	5.13468	5.18738	5.36099	5.35812	5.00891	5.4521	5.49568	5.24057	5.09356	4.83462	5.3105	4.98759	5.03597	4.69613	5.01927	5.13141	5.40978	5.02666	5.04207	4.85744	5.51581	5.34312	5.18588	4.55053	5.17269	4.96667	4.90239	4.95928	5.26235	5.36916	4.79101	5.23224	5.59727	4.97697	4.97482	4.97149	4.95864	4.84068	5.0915	5.19505	5.11407	5.33622	4.78537	4.99621
LINC01487	3.01901	3.43991	3.14605	3.05447	3.3397	3.19284	3.31006	3.27596	3.20161	2.93114	2.97053	3.4537	3.01001	3.0997	3.13892	3.2351	3.39534	3.14167	3.07976	3.31426	3.06331	3.23998	3.10904	3.28961	2.82924	3.07655	3.08666	3.15565	3.1588	3.2492	3.03683	3.30219	2.89534	3.24657	3.1559	3.02659	3.15204	3.03156	2.86266	3.42404	3.10665	3.21455	3.30648	3.0069	3.14175	3.08168	3.06183	3.10491	3.344
LOC101928201	3.12851	3.03043	2.91882	2.97629	2.74489	2.91584	3.05917	2.97341	2.96189	2.97298	3.20745	2.75603	3.06986	2.9958	2.94343	2.87522	2.70439	2.86946	3.00679	3.06826	2.95984	2.80744	3.20939	2.88779	2.80558	3.14479	3.05644	2.91461	2.95398	3.17546	2.7765	2.98298	2.72839	2.91135	2.78908	2.94693	3.05097	2.87638	2.94354	2.8493	2.68728	3.1032	2.86386	2.86336	2.98002	3.25705	2.86186	3.01623	3.08055
IL12A-AS1	4.22657	4.37421	4.20347	4.28901	4.15526	4.46797	4.29789	4.14827	4.09182	4.32106	3.97886	4.19282	4.35416	4.37002	4.27325	4.24495	4.05825	4.10233	4.096	4.17036	4.08526	3.8263	4.18416	4.39597	4.17205	4.15396	4.38937	4.41663	4.5985	4.55125	4.35582	4.87229	3.94358	4.2683	4.46013	4.4055	4.13863	4.36539	4.38216	4.35448	4.12172	4.30871	4.40253	4.38711	4.22384	4.11856	4.09728	4.10318	4.20012
LOC101928386	3.26753	2.89008	3.19964	3.09864	3.12216	3.0464	3.01911	3.51136	3.35511	3.51967	3.26799	2.9479	3.21193	3.02423	2.92238	3.37684	3.07269	3.72984	2.74988	2.99803	3.22905	3.07658	3.15277	2.92556	3.21426	3.3239	3.13598	2.88629	3.14026	2.77022	3.03199	2.90165	3.36511	3.41431	3.19786	3.07174	3.45484	3.23975	3.21967	3.13142	2.98366	3.75189	3.02336	3.33158	2.96481	3.0933	3.05554	2.7524	3.03611
LOC101928419	6.25447	5.3246	5.2699	5.45025	5.31575	5.35782	5.3505	5.38345	5.97453	5.77527	5.34019	5.36245	5.91334	5.15122	5.13822	5.58733	5.33202	5.32027	4.55794	5.69032	5.50933	5.85876	5.60902	5.06484	5.31469	6.02581	5.76369	5.52332	5.45422	5.14928	5.44417	5.17933	5.55567	5.66981	5.10493	5.94863	5.2915	5.38268	5.34584	5.38894	5.1972	5.69749	5.31938	5.60466	5.30682	5.47564	4.87172	4.67639	5.50487
LOC101928429	8.42322	7.99934	6.48339	7.4412	7.72534	8.22334	6.51404	7.64356	8.26502	7.28441	7.56683	7.49674	8.13269	7.97481	7.08815	8.17627	7.64399	8.56606	6.35996	7.89971	9.04784	7.80041	8.29934	7.07275	7.28231	7.78187	6.49846	6.85045	8.00488	8.45877	7.77543	6.40004	8.22345	7.76012	7.75485	7.90788	8.06571	7.47511	7.06042	8.79964	7.69097	7.58834	7.29261	7.55142	8.02371	7.85361	7.11386	6.25168	7.82228
LOC101928491	2.81257	2.86246	2.79126	2.95616	2.94137	2.75197	2.74382	2.62202	2.77513	2.94886	2.89303	2.84134	2.94218	3.21753	3.09103	2.78361	2.79492	3.26486	2.84246	2.88597	2.99572	3.02356	2.84563	2.96045	2.91521	2.80949	2.76518	2.94846	2.99024	3.12847	2.67405	2.94499	2.6345	2.78919	2.79221	2.95079	2.79126	2.71382	2.76564	2.72567	2.88277	2.7049	2.67233	2.83321	2.85657	2.86179	2.80763	2.85575	2.93139
LOC101928495	2.81925	2.48098	2.55459	2.78107	2.49222	2.56357	2.51392	2.6255	2.60317	2.51593	2.58445	2.61285	2.64759	2.87188	2.75941	2.46555	2.53342	2.52441	2.4008	2.41994	2.57913	2.55172	2.51532	2.54116	2.59201	2.76958	2.71873	2.6557	2.5773	2.53456	2.55306	2.64275	2.76757	2.54629	2.52714	2.57815	2.49593	2.87471	2.58409	2.60784	3.04435	2.43942	2.51545	2.63843	2.81349	2.75488	2.67228	2.36945	2.492
LOC101928505	3.03496	3.02856	2.89604	2.98747	3.26571	3.13804	3.28874	2.9482	3.22328	2.9829	2.9551	2.77727	3.12507	3.25659	2.94005	2.75072	3.11745	3.36265	2.95969	3.19618	2.78306	3.17154	3.17431	3.112	2.86688	2.91509	3.04581	2.92782	3.11614	2.99916	2.9855	2.85469	3.0912	3.16652	2.81372	2.75561	3.16188	2.96593	3.14488	3.06756	2.92045	3.12601	3.11477	3.24913	3.15973	3.04723	3.22767	2.94744	3.20757
CATIP-AS1	6.72873	6.4587	6.88257	6.87874	6.75521	7.31648	6.77819	7.55861	6.78733	6.89963	6.45758	6.65252	6.72395	6.56339	6.6979	7.20089	6.90142	6.90404	6.35923	6.717	6.8043	7.1849	6.70463	6.75605	6.88098	6.85925	6.46845	6.55803	6.4485	6.67727	6.36772	6.16189	6.6547	6.9988	7.20401	6.25004	6.7958	7.12243	7.06382	8.13912	6.67672	6.29821	6.5511	6.69649	6.91832	6.58786	6.37022	6.39958	6.73215
LINC02225	2.62833	2.77798	2.87273	2.84101	2.87825	2.66987	2.98311	2.80675	2.92303	2.68681	2.89973	2.89135	2.77174	2.79544	2.70631	2.97779	2.79708	3.03026	2.90495	2.78148	2.70102	2.72817	3.08301	2.84911	2.57987	2.79049	2.76432	2.93054	2.70855	2.92601	2.89072	3.10005	2.83704	2.65476	2.7334	2.82369	2.67216	2.95118	2.91253	2.73645	2.90126	2.69147	2.78185	2.80559	2.94596	2.79564	2.78744	2.89582	2.7754
LINC01537	2.49744	2.51005	2.5265	2.71808	2.46102	2.63737	2.75829	2.64687	2.48981	2.36503	2.72648	2.57876	2.52569	2.60161	2.43457	2.61453	2.5821	2.78681	2.55827	2.64872	2.72433	2.62762	2.85706	2.59281	2.4895	2.54073	2.76285	2.56257	2.66779	2.66888	2.38744	2.43699	2.40952	2.45545	2.42216	2.38158	2.57806	2.76734	2.6219	2.45111	2.70226	2.77845	2.62408	2.91224	2.53374	2.56882	2.50929	2.50381	2.63456
LOC101928697	3.26989	3.36452	3.02763	3.08499	3.08296	3.56745	3.20776	3.33538	3.09781	3.17843	3.22566	3.34387	3.18658	3.55196	3.12786	3.55241	3.33723	3.26833	3.37323	3.17207	3.41533	3.44203	3.2743	3.21122	3.29332	3.44841	3.30171	3.40837	3.46795	3.49583	3.51969	3.62115	3.29953	3.26759	3.31779	3.27724	3.22548	3.21868	3.13216	3.58012	3.60284	3.13876	3.22592	3.3143	3.25493	3.07729	3.35065	3.33896	3.19967
SCAT1	4.88149	5.18143	4.46791	5.03418	4.70406	5.00886	4.03926	4.88056	4.64266	4.62682	4.67129	5.09605	4.77033	4.95138	4.57516	4.60809	4.85857	4.59143	4.96979	4.38506	4.83015	4.73089	4.84319	4.38372	5.05337	4.63272	4.65773	4.69637	5.03749	4.75302	4.33968	4.66887	4.53898	5.14704	4.98681	4.73404	4.74004	4.86112	4.52562	5.09695	4.42421	4.53326	4.76433	4.66572	5.29574	4.61642	4.4503	4.98308	4.41207
LOC101928728	5.47022	5.29464	4.96591	4.85558	5.34653	5.0088	5.181	5.85344	5.15802	5.08104	5.60234	5.44696	6.08245	5.03706	5.73182	5.81309	4.81397	5.88268	4.86221	5.00589	5.28934	5.32734	5.03158	4.71101	5.56975	5.30394	5.18719	5.01767	4.62095	5.08702	5.32319	4.96982	5.56379	4.89398	5.25313	4.85205	5.51321	4.71373	4.99057	4.7888	5.31856	5.41068	5.44209	5.41257	5.3868	5.29811	5.12328	4.96644	5.0129
LOC101928731	3.8707	3.23151	4.00923	3.98372	3.54165	3.68097	3.81372	4.10359	3.95361	3.76846	3.52825	3.16302	3.51309	3.56815	3.63112	3.78315	4.67425	3.51359	3.79715	3.82213	3.68979	3.82323	3.76422	3.46985	3.65326	3.46071	4.51955	3.69818	4.11797	3.6586	3.376	3.29896	4.00837	4.03401	3.61316	3.85892	3.81778	3.80958	4.17521	3.62652	3.6786	4.61479	3.83329	3.81279	3.69282	3.74102	4.24613	3.86263	3.86222
LINC01526	4.9542	5.11691	4.91007	5.06785	4.8104	5.49104	4.88301	4.7646	4.66797	5.02496	4.77771	4.78324	4.90032	4.81623	4.9549	5.12157	5.01586	4.89975	5.30466	5.0371	4.81596	5.30826	5.17109	5.25571	5.1379	5.21358	4.63581	4.71196	4.70879	5.34059	4.78409	4.94065	4.98753	4.84482	4.83502	4.73385	5.04739	4.75287	5.13355	5.88512	4.90282	5.29422	4.60854	4.9941	4.7091	4.92419	4.93518	5.20856	5.25905
PEX5L-AS2	3.55518	3.15588	3.48403	3.59909	3.43358	3.49277	3.58155	3.16157	3.3248	3.37624	3.53151	3.30594	3.64299	3.55325	3.63885	3.52246	3.39281	3.34554	3.29703	3.60993	3.3819	3.46932	3.5146	3.49014	3.56351	3.17736	3.49067	3.25971	3.45852	3.14713	3.31882	3.58986	3.32314	3.42968	3.67494	3.46178	3.60329	3.52304	3.46615	3.61596	3.29684	3.33367	3.30309	3.49755	3.42851	3.43509	3.22742	3.32849	3.54711
LINC01448	3.14283	3.11709	3.50199	3.3044	3.27167	3.47882	3.05897	3.58576	3.13168	3.13774	3.37445	3.31886	3.41279	3.39496	3.39022	3.0016	3.07746	3.15033	3.36395	3.32254	3.08543	3.18542	3.35756	3.12757	3.25747	3.19412	3.00798	3.09977	3.15489	3.43833	2.98804	3.03082	2.96389	3.3025	3.09234	3.11642	3.40599	3.16331	3.15006	3.24139	3.10707	3.14367	3.10675	3.01094	3.29072	3.29896	2.88492	3.38265	3.32413
LOC101928834	3.77914	3.19988	3.46511	3.3586	3.75842	3.49251	3.38702	3.42186	3.70484	3.62157	3.54346	3.41326	3.64108	3.63715	3.66906	3.87307	3.45826	3.63734	3.34803	3.62406	3.45101	3.2718	3.85622	3.39524	3.61339	3.78759	3.30295	3.92492	3.67025	3.38316	3.50083	3.54377	3.86469	3.36895	3.93953	3.49624	3.65739	3.57683	3.39667	3.48719	3.67292	3.6705	3.61496	3.48952	3.38063	3.57209	3.35996	3.41925	3.69176
LOC101928893	2.63885	2.81164	2.9798	3.16916	3.00197	3.15171	3.12104	2.81662	3.39069	3.02917	3.00788	2.72837	2.77186	2.94432	2.79704	2.81988	3.07543	2.99625	2.89334	3.05859	2.92868	2.98337	2.86156	3.0435	3.06206	2.98215	3.12115	2.8117	2.86573	2.82613	2.87889	2.77238	2.73787	2.90376	2.71349	3.0435	2.66222	2.58314	2.71306	3.61259	2.86624	2.93852	3.24221	3.04129	3.10327	2.91736	2.85786	2.83515	3.07707
LOC101928940	3.18255	3.07088	3.32364	3.34674	3.20566	3.18372	3.22737	3.42482	3.33723	3.0469	3.18512	2.91875	3.32492	3.27657	3.31767	3.19658	2.99827	3.17887	3.27829	3.13757	3.441	3.17071	3.09441	3.02358	3.03458	3.41886	2.98972	3.0561	3.04725	2.93959	3.00061	3.15808	3.15021	3.29759	3.02801	2.91091	3.11794	3.31328	3.08522	3.25612	2.98844	3.13069	3.04429	3.14538	3.13681	2.96427	3.37249	3.31722	3.19616
LOC101928961	2.66234	2.77919	2.75326	2.89765	2.88744	2.83072	2.80441	2.83563	2.68479	2.66109	2.97925	2.7874	3.09009	2.65182	2.65622	2.89369	2.82837	2.68003	2.58119	2.87229	2.71373	3.03548	3.08915	2.74141	2.78833	3.06515	2.65039	2.67537	2.79979	2.84566	2.75931	2.73787	2.8055	2.57453	2.5925	2.69527	2.86027	2.7262	2.93641	2.80123	2.66031	2.76946	3.14736	2.71622	2.60981	2.75172	2.95653	2.53867	2.8689
LOC101928988	3.57379	3.13496	3.52944	3.48582	3.37627	3.57781	3.58361	3.1941	3.67993	3.61691	3.05443	3.22065	3.11104	3.04553	3.84963	3.42471	3.55218	3.43638	3.25261	2.84097	3.17162	3.49564	2.95609	3.24921	3.79594	3.84913	2.97419	3.35021	3.26945	2.95289	3.39265	3.10864	3.71213	3.23086	3.50583	3.10359	3.22525	3.21764	3.24178	3.2074	3.37475	3.68113	2.98883	3.09175	3.17727	3.29276	2.75498	3.35593	2.9303
LINC01516	3.47423	3.6653	3.45485	3.3059	3.47551	3.45335	3.5406	3.69115	3.3992	3.48738	3.1353	3.06065	3.48404	3.11723	3.2841	3.68806	3.57033	2.85197	3.26717	3.38713	3.18822	3.28321	3.36803	3.2492	3.58441	3.56997	3.52428	3.44591	3.2607	3.14234	3.40723	3.26945	3.47567	3.32477	3.64679	3.39424	3.52047	3.46489	3.64881	3.65234	3.13683	3.42741	3.52676	3.61591	3.10812	3.47861	3.3947	3.35936	3.40899
LINC00836	3.5921	3.36835	3.39949	3.39388	3.46752	3.43025	3.42341	3.47395	3.40537	3.34192	3.56141	3.42518	3.1196	3.71518	3.41296	3.58142	3.3667	3.43525	3.4318	3.24495	3.28581	3.23652	3.70327	3.55203	3.32939	3.45787	2.94079	3.09481	3.28681	3.34802	3.15256	3.21946	3.33626	3.18189	3.31009	3.33907	3.47718	3.17838	3.3144	3.30555	3.55702	3.53719	3.56233	3.34265	3.32057	3.4359	3.35268	3.42151	3.24497
LINC01350	3.79436	4.13293	4.06117	4.00558	3.76854	3.8603	3.85791	4.45991	3.84745	3.78036	3.77361	3.79327	4.14735	4.04292	3.61931	3.99617	4.17619	3.77095	4.23148	3.95598	3.92214	4.06018	4.29988	3.95562	3.74578	4.30467	3.90874	4.48901	4.17558	4.32591	4.21409	4.10226	4.11606	4.0124	4.06059	4.06266	4.01087	4.27824	3.89588	4.17306	4.08569	4.00739	3.99964	4.01706	3.84516	3.85799	4.18248	4.16043	3.94226
LINC00437	2.71924	2.45862	2.47666	2.57452	2.62811	2.28217	2.66481	2.59317	2.587	2.46384	2.52045	2.35961	2.52522	2.39472	2.54845	2.28079	2.31045	2.47219	2.33534	2.32428	2.38665	2.47583	2.31479	2.61415	2.32149	2.71558	2.54886	2.36331	2.49552	2.58811	2.48557	2.25466	2.57907	2.4185	2.40247	2.41948	2.55086	2.43432	2.59552	2.55398	2.44127	2.73035	2.57431	2.71579	2.59802	2.46529	2.7014	2.35173	2.31361
LINC01730	4.74844	4.27929	3.80999	4.18724	4.16211	4.03366	3.74102	3.75425	4.1754	4.25013	3.84873	4.39728	4.17353	3.75245	3.70058	4.28073	4.12038	4.32728	4.04631	4.03989	4.46016	4.42075	4.32556	4.14048	4.44699	4.17743	4.14563	4.3858	4.23804	4.30333	4.10403	4.6267	4.48299	4.11267	4.29036	4.46478	3.85048	4.3609	3.94699	4.23675	4.42389	3.53216	3.87763	4.08164	3.90799	4.08625	3.96808	3.99043	3.82248
LINC02114	2.83121	3.06369	2.94086	3.0812	2.97953	3.02796	2.80497	3.10565	2.77343	3.07388	2.85055	2.78146	3.10279	3.29013	3.07462	2.88068	2.795	2.92048	2.7235	2.94224	3.07538	2.88015	2.92165	2.78287	2.55607	3.3875	3.234	3.14399	3.23137	2.86466	2.79475	3.07045	2.87277	2.84279	2.81588	2.92662	2.94733	2.77623	2.72707	2.94005	2.87862	2.8562	2.87067	2.75908	2.79122	2.80305	2.99811	2.7549	2.95084
ATP13A4-AS1	5.7579	6.88727	10.1726	7.38093	7.74201	9.99208	9.11913	8.80877	7.36977	5.30665	7.21911	9.28068	8.16093	9.48115	4.87242	5.72097	6.04349	4.96324	7.83472	10.19	5.63477	6.60824	7.8196	7.31142	8.97459	6.34052	7.50888	11.2274	6.50095	9.63126	8.16892	8.4491	8.25394	8.86795	8.88142	9.41528	6.13789	4.41921	6.89181	11.4707	6.44681	9.42589	9.22253	9.60532	8.25294	6.78248	5.7918	7.90115	10.3042
MCM8-AS1	2.88617	3.38353	2.85096	2.92309	2.87787	2.92916	3.04695	2.98812	2.75339	2.80924	2.88797	2.94248	2.90573	2.96523	2.97536	3.1136	2.92616	2.85613	2.98661	3.26322	2.80592	2.83238	2.89444	2.89471	2.76678	3.39115	3.07884	3.00838	2.94134	3.11871	2.90887	3.28189	2.88724	3.04468	2.97986	2.98082	2.83497	2.79624	2.93817	2.98236	3.04228	2.80962	3.14948	2.87927	2.94692	2.93579	3.21267	3.03152	3.30616
ADAMTS9-AS1	4.83849	4.29635	3.76706	5.34579	5.15999	4.31258	4.07508	4.9977	4.76328	3.94061	4.0356	4.69157	4.98448	5.07223	4.86702	4.70834	4.15347	4.0023	3.89602	3.75778	4.05858	5.55162	3.94965	3.33362	4.09994	3.60456	5.053	3.16487	3.77652	5.36207	3.96333	3.56372	3.3045	4.80257	5.27085	3.24319	4.41973	4.01122	3.59582	4.5052	3.77982	4.67378	4.11469	5.47036	4.30403	5.40856	3.87255	4.5494	3.48969
LINC01722	2.83791	2.9768	3.05093	2.96528	3.00603	2.91908	2.7895	2.91433	2.84066	2.98823	2.88348	2.82486	2.94472	2.93567	2.90286	2.93748	3.00213	2.94278	2.94343	3.15473	2.98626	2.99433	3.01754	3.26624	2.9162	3.20949	3.05508	2.90688	3.12264	3.01579	2.7263	3.06797	2.96216	2.7434	3.03178	2.99511	2.56275	3.11149	2.94774	3.32147	2.98707	2.75966	3.21373	2.98732	2.95372	3.17197	3.30291	2.96056	3.23001
LINC02150	3.54014	3.72362	3.7551	3.7285	3.94657	3.62871	3.84641	3.84131	3.33941	3.48078	3.98168	3.44172	3.73791	3.69717	3.56745	3.71055	3.74604	3.98048	3.42137	3.5198	3.4441	3.65504	3.67713	3.56638	3.75187	3.85487	3.54781	3.79599	3.48185	3.38547	3.51638	3.78472	3.45551	3.60849	3.44916	3.52201	3.60624	3.4049	3.62523	3.8082	3.49001	3.52276	3.83785	3.59599	3.70229	3.77098	3.37785	3.39779	3.53065
LOC101929512	4.08108	4.21621	4.62927	4.34378	4.46806	4.5937	4.72439	4.89418	4.45866	4.79052	4.81445	4.65407	4.52133	4.22721	4.73129	4.96366	4.57241	4.81905	4.37287	4.61955	4.46534	4.50187	4.6402	4.70723	4.44056	4.50584	4.48796	4.44271	4.19689	4.38887	4.61856	4.01022	4.31599	4.79646	4.38335	4.30283	4.44615	5.01156	4.29999	5.04153	4.84134	4.63628	4.41427	4.61508	4.78903	4.90404	4.34938	4.39814	4.66352
LINC00993	3.11812	3.14346	3.38124	2.91398	3.02461	2.96269	2.9732	3.30184	3.02248	3.03896	2.9014	3.05671	3.14247	3.25437	2.90414	3.10203	2.91696	2.98874	2.72776	3.23349	3.07413	2.99425	3.03654	3.2411	2.90003	3.17148	3.06147	3.02787	3.30412	2.88236	3.06945	2.9628	3.10965	3.1604	3.0978	3.18031	2.94056	2.98045	2.76983	3.10312	2.8763	2.75923	3.03583	3.11744	3.0379	2.88075	3.13748	2.71288	3.29602
LINC01215	4.23568	4.65665	4.09835	4.20171	3.86862	4.36881	3.84427	4.09523	3.77064	4.1579	4.19254	4.11974	3.79103	4.90301	3.68695	3.84383	3.95941	3.88338	3.75458	3.79955	3.90724	4.20587	3.36694	4.01061	3.69162	4.12899	5.3676	3.44009	3.77094	5.63417	3.98726	3.00082	3.86699	3.67527	4.44385	4.42104	4.544	3.84717	3.91572	5.05567	3.63783	3.83629	4.44695	5.00384	4.20335	3.44754	3.55688	3.71261	3.73448
LINC01583	2.28467	2.49046	2.5144	2.51231	2.35254	2.3149	2.45389	2.67128	2.61924	2.34722	2.50372	2.41685	2.43294	2.85726	2.45632	2.67483	2.43676	2.35045	2.43496	2.5088	2.52095	2.30369	2.66527	2.37075	2.49588	2.53056	2.39841	2.44625	2.49026	2.31804	2.3597	2.48936	2.60578	2.30221	2.47481	2.54166	2.38016	2.4797	2.32621	2.53186	2.52279	2.47519	2.73502	2.53823	2.35311	2.32928	2.24421	2.45017	2.52648
CALCRL	9.31041	7.86517	7.72771	8.49129	8.1086	7.99142	8.02131	7.9837	7.81034	8.3041	8.25746	8.44406	8.70333	7.28899	8.36872	7.87434	8.7728	7.9126	6.74459	7.96733	8.38698	8.2697	8.61474	7.33592	7.88624	9.11513	7.29504	7.265	8.52749	8.01327	7.7187	8.37794	8.30486	7.68566	7.74598	9.4664	8.35735	8.08549	7.99556	7.09899	8.18253	8.4379	7.73796	8.07569	7.88696	8.88745	8.25697	6.53241	7.88038
PRG4	5.16551	4.87986	6.10058	5.02326	6.68303	4.9087	7.21076	6.18994	6.70293	5.46558	5.43862	3.91686	5.70026	3.54718	5.34817	5.13032	6.96099	4.54523	6.82588	6.15364	4.94665	4.28357	5.86934	5.13641	7.08068	5.70952	5.07066	6.28739	8.81477	4.46352	7.88385	4.35907	6.36896	5.73668	3.13378	4.71318	3.66716	6.38417	4.86579	4.09623	7.18155	5.16602	3.49157	8.20516	5.54863	4.28088	7.17382	6.75149	6.1418
ANGPTL7	5.92638	5.7099	5.20161	5.90908	5.96668	5.62474	6.119	5.57386	5.18367	5.70063	5.78206	5.66462	6.44968	5.27685	5.12176	6.12323	6.02508	7.51061	4.9032	5.7439	6.59058	5.6489	5.64936	5.43233	5.37748	6.80492	5.28118	5.46824	5.00892	5.30375	5.48833	5.44955	5.11331	5.71321	5.58161	5.45027	6.32168	6.62424	4.85605	5.36405	6.39334	5.1908	4.93128	5.56123	5.17766	5.77903	5.81675	4.92568	5.70656
TRIB1	6.73173	6.54052	7.02431	7.05136	6.89102	6.71943	6.67006	6.72551	6.69008	6.36051	6.61427	6.84778	6.36459	7.30566	6.56036	6.27951	7.07117	6.62568	6.62061	6.36766	6.69564	6.37216	6.63304	6.32236	6.40392	7.07795	6.26764	6.64798	6.66292	7.49591	6.62179	6.28031	6.31504	7.21587	6.72682	6.1615	6.18191	6.64244	6.23405	6.36683	6.34395	6.4199	6.53777	6.73739	6.575	6.828	7.13037	6.83592	6.52246
GPA33	7.63566	6.97084	7.61525	8.6472	8.20843	9.47305	6.54519	7.74868	7.93609	8.38158	6.84697	7.49732	7.95333	7.1006	7.3556	7.6385	7.35496	8.86818	6.30281	7.40635	7.65264	7.37012	7.33152	7.91969	7.8198	8.39613	6.7363	6.94653	8.06998	7.8329	6.88801	6.85334	6.83981	8.5544	7.90444	7.71373	7.85214	9.29457	7.70412	8.26839	7.57355	9.28749	8.53376	6.33071	7.97296	7.67651	7.02828	6.39706	7.41378
CD96	5.26415	5.24271	5.57557	5.52779	5.75373	5.34296	5.40476	5.55378	4.87233	5.11059	5.15091	4.71265	4.91027	5.76519	5.86297	5.42876	4.65659	5.18887	7.4312	4.86188	5.51945	5.60256	5.57739	6.11458	5.23202	5.90916	5.70018	5.24294	5.51425	4.99619	5.65298	4.3818	6.01019	5.26489	5.25619	5.25494	5.49125	4.98148	5.18492	5.60987	4.64615	5.10408	4.81369	5.68585	5.06317	5.08513	4.94778	7.76003	4.97587
NBR2	6.90302	7.65508	7.24338	6.90591	6.59139	6.63062	6.88269	6.53267	6.96158	7.04635	6.47954	6.81616	6.54887	5.9427	6.32891	6.98269	6.54247	7.08636	6.78432	7.11158	6.91543	6.36778	6.56091	6.70331	6.58572	6.80473	6.75936	6.95764	7.53265	6.25191	7.16102	6.9039	6.92306	6.22709	6.37717	7.07986	6.60016	7.03645	6.97098	6.26786	6.63571	6.64726	6.64451	6.18002	6.77545	6.92356	7.08543	6.76758	7.05308
MSLN	9.74895	10.1666	10.3161	9.69122	9.68143	9.60484	11.1637	10.5711	9.15069	9.74265	10.1613	9.93775	10.713	8.42386	9.25077	10.178	8.54335	9.30017	10.0321	10.1234	9.97837	7.25837	9.59908	11.6788	8.55775	9.25108	9.42109	9.86089	10.0208	10.2588	8.31406	9.53208	9.0533	10.7259	9.14269	9.88242	8.7517	10.7571	10.2081	9.13434	8.71744	8.74568	10.5731	9.9593	9.7664	10.4489	9.56661	10.0754	10.1698
LRRC23	6.73646	6.78499	6.42797	6.21929	6.42709	6.60993	7.33616	6.57257	6.52735	8.00856	6.72854	6.94411	6.3728	6.9939	6.81964	6.78805	6.46572	6.65843	8.46643	7.91116	7.63279	6.35035	7.09907	7.56064	6.47194	7.36568	7.36724	6.69474	7.19931	6.727	7.97254	6.86553	6.39463	6.49389	6.29462	6.60023	7.18204	6.85198	6.48252	7.0527	8.32477	7.23389	7.19786	6.26421	6.7783	7.86243	8.72333	8.47114	7.88794
LRRC17	5.79949	5.07398	5.97799	5.09281	5.23433	5.59214	5.37276	5.59702	5.75701	5.50177	5.13008	4.74363	5.18218	4.95221	7.01702	5.84019	6.87348	5.63622	6.99453	5.82489	6.46949	5.35835	5.96557	5.9561	5.35023	5.74256	7.8918	5.15773	5.78889	5.0361	5.85514	6.61331	5.77976	5.35449	5.07317	4.98767	5.49994	6.01801	6.45777	5.48056	6.29849	6.70364	5.83269	5.18805	6.47104	5.1852	5.50571	6.37133	5.55995
KCNMB2	4.72426	4.15576	4.01393	4.43672	4.32563	4.68269	4.96702	4.66032	4.67874	5.59334	4.59303	4.10706	4.4451	4.32421	5.0708	4.95147	4.08382	3.97805	5.57618	5.8105	4.98179	4.21534	4.51714	5.04578	4.14595	4.74492	5.56715	4.566	5.22349	5.02863	4.93057	4.72423	4.27087	4.21744	4.46988	4.32753	5.24426	4.13723	4.24052	4.27481	5.58187	5.56406	4.59037	4.28126	4.40808	5.54655	6.33032	5.56585	5.76536
SPRY1	9.53872	9.23322	9.93601	9.6486	9.48936	8.87087	9.17123	9.34078	9.99408	9.76165	9.5196	9.25287	9.91021	9.3275	9.17763	9.2845	8.62318	9.60261	9.32579	9.50423	8.96284	9.62933	9.18716	9.5801	9.49682	9.16124	9.87952	9.94962	9.19202	9.1968	9.24448	9.98515	9.99608	9.84777	9.69111	9.4183	9.19034	9.09131	9.76373	9.3507	9.51712	9.08227	9.3548	10.4344	9.79207	9.67088	9.4482	9.37304	9.40605
CDKN1A	11.9537	10.7175	11.2324	12.0209	11.5764	11.2549	10.7811	11.2995	10.8917	10.822	10.6595	11.0256	10.8552	12.376	10.7843	11.1869	11.2725	10.9497	11.6489	10.0139	10.873	11.1808	10.3279	10.6228	10.461	11.4172	9.93415	10.7127	11.1597	12.3329	10.7588	10.2686	10.1974	10.9608	11.1107	10.3074	10.3649	10.7241	11.1859	10.4885	11.1318	11.2869	11.0096	11.7525	11.1384	11.0959	10.9899	11.629	10.2084
DENND4A	7.9499	7.91979	7.40341	8.36856	8.01282	7.74968	7.53745	7.64484	7.66111	7.49896	7.59055	8.39487	7.72293	8.0725	7.15112	7.41589	7.50149	7.7892	7.7689	7.45876	7.536	8.00052	7.49101	7.38351	7.71776	7.64477	7.13307	7.47465	7.33498	8.37164	7.64871	7.69324	7.60762	7.56172	7.85295	8.18827	7.67288	7.58433	7.55659	7.43084	7.36408	7.69936	7.59507	8.39766	7.64283	8.34598	7.44253	7.82544	7.41555
LOC102606465	7.32152	8.16941	7.9163	7.02122	7.31878	7.44975	7.842	7.63245	7.88371	7.28645	7.42119	7.44119	6.90378	6.86625	7.08549	7.23887	7.54905	7.61905	7.15506	7.83071	7.4246	6.86186	7.67879	7.38298	7.63826	7.65628	7.80644	7.62144	7.19101	6.66715	7.69932	7.41328	7.62384	7.62298	7.48267	8.19567	7.56862	7.36321	7.93161	7.3783	7.07189	7.49278	7.3849	6.9902	7.75771	6.83077	7.47182	7.19511	7.88245
IGSF6	8.95288	9.0694	7.97398	8.28132	8.52565	8.95863	7.77172	8.05529	8.51307	8.23604	8.37618	8.68049	8.13466	9.1265	8.82789	8.87329	9.11973	8.84384	9.49432	7.38419	9.25443	8.04209	8.8557	7.93613	8.56831	8.14795	8.18542	8.1564	8.95355	8.97161	8.76686	8.3887	8.93025	7.48809	8.78933	8.84886	8.90447	8.37454	8.31897	9.28776	8.96687	7.94094	8.58154	8.9591	8.79873	8.18312	8.32603	9.53694	7.55179
IRX5	8.52454	8.58795	8.58347	8.87324	8.85355	8.11325	8.3059	8.59707	8.98764	9.04112	9.1308	8.88296	9.30699	8.31244	9.12206	9.07986	8.6244	8.83943	9.01203	9.48039	9.29105	8.96463	8.98767	9.19431	9.21294	8.52882	10.1574	8.2768	8.55903	8.52255	8.93404	8.64689	8.7334	9.04689	8.70243	8.74774	9.73077	9.30328	8.77957	8.70563	8.40107	8.16635	9.28539	8.40994	8.40494	9.31209	8.8446	9.01174	9.4675
RAMP2	10.0408	8.80607	8.63359	8.65331	9.52249	9.25427	8.97408	9.59135	8.89351	9.68471	9.24754	8.94099	8.83514	8.18908	8.75771	9.45624	9.98974	9.29185	8.06225	9.26344	10.1104	9.10174	9.55923	7.4836	8.70246	9.83327	8.12123	7.9971	9.36624	9.33648	8.75131	7.9818	8.13498	8.46526	9.13089	9.93338	9.39349	9.5222	8.59312	7.77774	8.78272	9.37971	8.77529	8.85612	8.11072	9.11301	9.16488	8.10479	9.22738
RAMP3	10.8115	8.70111	8.70146	9.12	8.69649	9.54277	10.0102	10.2936	8.93529	10.848	9.07139	9.69616	8.22793	7.97246	6.76199	9.85238	10.1645	9.98258	8.95007	8.52083	10.5745	9.6849	10.4092	7.95757	8.78566	10.6274	8.02976	7.04148	9.68081	9.09849	9.92809	7.67997	7.44946	9.1991	9.41948	10.4247	10.3068	10.2515	7.40909	8.811	8.97023	9.37684	9.24286	9.49503	8.13133	9.15355	8.94542	8.91628	8.43858
FSTL3	9.97986	10.2486	9.47645	10.2085	10.1209	9.45735	9.92234	9.85254	9.09053	9.02368	10.081	10.2234	10.1462	9.73313	9.29819	9.84559	9.64186	10.1176	9.02273	9.67519	9.57793	9.58589	9.86359	9.27778	9.47771	9.49108	8.34883	9.57704	9.4215	9.59844	9.89052	9.77702	9.96199	9.67815	9.48852	9.58482	9.69435	9.38023	10.2034	8.79277	9.88191	9.31657	9.52896	10.9631	9.91645	9.80621	9.80384	9.04468	9.71164
GHET1	3.90671	3.88536	3.89061	3.76946	3.95989	4.03385	3.97349	4.24722	4.14826	3.86732	3.73839	3.72312	4.06148	3.89126	4.52265	3.84639	4.10292	4.13089	4.11391	4.49	3.86396	3.72913	4.24728	3.87046	3.93461	4.03736	4.37455	4.06407	3.76969	3.70448	3.8529	4.00761	4.54392	4.06271	3.76842	4.04641	4.19479	3.92412	4.27488	3.8888	4.13889	4.35264	4.10446	3.95614	4.12865	4.09402	4.01743	4.06155	4.52055
FRG1EP	4.16391	4.19262	4.47005	4.46522	4.01353	4.36041	4.05777	4.33755	5.13445	4.81015	4.45936	2.83099	3.26457	3.94232	3.27589	3.42148	4.18713	4.56382	4.45069	4.01063	4.3923	3.9615	4.56926	4.36865	4.25841	3.79004	4.27197	4.80305	3.99591	3.39848	3.56778	3.90905	4.41724	4.22316	3.37187	3.7699	3.8501	3.30927	4.09465	4.33702	4.68508	5.02699	4.59785	4.24939	4.33488	4.22691	4.22676	3.97148	4.05163
LINC01500	2.84178	2.83191	3.02562	2.84695	2.90761	2.9394	2.71205	2.88917	2.80842	2.69163	2.90542	2.7539	2.65731	2.62676	2.65231	2.96584	2.75026	2.63197	2.87839	2.75993	2.85743	2.68325	2.93201	2.7973	2.69854	2.94096	2.76829	3.02978	2.83681	2.61137	2.7328	2.79173	2.86627	2.86324	2.95794	2.74328	2.9416	2.86697	2.81798	2.96971	2.67404	2.81966	2.79742	2.69675	2.65163	2.82457	2.74348	3.03388	2.67145
LINC01393	3.10416	3.15857	3.115	3.24737	3.36263	2.90053	3.3893	3.207	3.17179	2.88847	3.31119	2.92224	3.26083	3.32842	3.10278	3.25121	2.96473	2.84309	3.0159	3.13565	3.12256	2.91279	3.40906	3.1828	2.95414	2.87039	3.18808	3.28772	2.87865	2.97519	3.05983	2.86423	3.07892	3.05154	2.93974	3.07245	3.17575	3.14923	3.07584	3.21479	2.89393	3.20807	3.18395	3.29866	3.08659	3.1376	3.13213	3.02482	3.21166
EFS	7.62643	7.66709	8.43193	7.36763	7.59346	7.67169	8.18751	8.27012	8.2723	7.61431	7.51551	7.06195	7.67236	7.55299	7.60883	7.92127	8.10838	7.38946	7.47066	8.07617	7.7467	7.43075	7.91705	7.93546	7.59424	7.61577	9.32564	7.84415	7.88278	7.47614	7.72001	7.84042	8.13958	8.09647	7.85968	7.44457	7.61251	7.80561	8.12097	7.77311	8.13177	8.15449	8.15214	7.26514	8.17262	7.40487	8.29776	7.44698	7.99884
LILRB2	9.08862	9.0263	7.60946	8.87369	9.08347	8.71908	8.17187	8.59914	8.84331	8.65519	8.61483	8.9178	8.24863	8.92601	7.93344	9.11435	9.17454	9.23616	7.89869	7.81802	8.85845	8.36032	8.74654	7.98988	8.40582	7.07582	7.25487	7.92975	8.31191	8.6508	8.89333	7.85511	8.36194	8.28174	8.9231	9.13603	8.87668	8.28604	8.16506	8.80157	8.53297	8.79761	8.92151	8.66809	8.28642	8.14846	8.39522	8.17258	8.01514
CDKN2B	7.48681	7.38686	6.41023	7.77818	7.16197	6.86209	7.28702	7.02239	6.95149	7.18006	7.17585	6.78844	7.46919	6.35393	7.08239	6.37179	7.33703	7.45499	6.82183	6.90763	7.19161	7.41922	6.932	7.12525	7.40866	7.40327	6.14965	7.33543	6.58829	6.58179	7.07717	7.16902	7.36905	7.40907	6.6663	7.26975	7.03838	7.03124	7.46284	6.87205	7.18942	6.15255	6.79063	6.93293	7.2679	6.69301	7.30751	6.94114	6.96373
DLEU1	7.54645	7.86129	8.39678	7.1526	6.9435	7.8323	7.87177	7.92823	8.19556	7.9973	7.84443	7.30524	7.84033	7.20256	7.93288	7.84691	7.74777	7.08092	7.83349	7.77828	7.96902	7.5953	7.9072	8.45014	7.87918	8.06195	8.78787	7.91688	7.95557	7.25026	7.65616	8.70319	8.1302	7.87703	7.87506	8.19576	7.84398	8.27137	8.19631	7.90399	7.81144	8.20705	8.14577	7.003	8.00629	7.33634	8.0341	7.83947	7.77019
ZNF267	7.70046	7.52983	6.73275	7.73461	7.59498	7.55797	6.92194	6.84718	6.65741	6.98704	6.90385	7.93571	6.89729	8.01583	6.74299	7.0953	7.74615	7.21701	7.8124	6.78669	7.44024	7.60294	7.06282	7.3761	7.16065	6.93219	6.50919	7.12261	7.34517	7.94119	7.40818	7.30674	6.92234	6.49381	8.02013	7.51936	7.33738	7.4859	7.0774	6.84628	7.31257	7.48978	7.12317	7.58119	7.32827	7.3301	7.05706	7.85125	6.7586
CCNO	5.66251	5.49743	5.11518	4.99217	5.64967	5.1186	6.03344	5.08407	5.09901	5.99771	5.56032	5.19581	5.30384	6.07813	5.89722	5.70296	6.23331	5.02545	6.3573	6.57255	6.21084	4.88991	5.85699	6.04403	5.32347	5.45915	6.75925	6.26916	6.0863	5.46226	6.14904	5.8936	5.24116	4.97495	4.93012	5.06849	6.25556	5.80724	5.1583	4.94621	6.94648	5.89934	6.01399	4.93246	5.29006	6.35002	6.76221	6.4234	6.50794
CDKN2C	7.29986	6.78482	8.30932	7.39275	7.36163	7.52484	7.63768	8.09745	8.07231	7.70605	7.17898	7.31693	7.02898	7.17481	7.88347	7.92041	7.91581	7.23902	7.61859	7.45396	7.56898	7.70658	7.83064	7.41045	7.55193	7.38603	8.6674	7.91388	8.36926	7.18836	7.82077	7.40833	7.9729	7.63295	7.65931	7.47191	7.67058	7.96639	8.15147	7.55686	8.1868	8.51098	7.65388	7.61178	8.34291	6.89781	7.94319	7.61638	7.44499
CDKN2D	7.1298	7.65109	7.20142	7.58098	7.61813	7.33368	6.7749	7.17053	7.11878	7.30247	7.7921	7.67466	6.72706	7.61307	7.00175	7.44547	7.44547	7.60641	6.85906	6.94667	7.35254	7.38884	7.27237	6.81317	7.38647	6.8109	6.62794	7.0132	7.01205	7.58115	7.23179	7.15716	6.86987	7.41079	7.59298	7.31783	7.26746	7.36707	7.20865	7.23993	7.13824	7.24328	7.10051	7.18386	6.96419	7.09294	7.57996	7.03061	7.36662
CRISP3	4.11138	5.22378	3.9065	6.4273	5.55863	6.16898	4.6202	3.82192	3.75059	6.70375	5.44372	5.84898	4.04102	5.09195	5.21423	5.0842	5.46378	4.83357	3.63204	5.76871	7.53502	4.38514	5.33231	4.22966	5.13234	5.43382	6.95917	3.76178	3.98241	6.38968	4.84369	4.78624	3.95548	4.50623	3.75354	5.83611	5.52621	5.8335	3.92891	4.89833	5.34692	5.06306	5.57047	4.39545	4.19383	7.01276	6.5705	3.45357	5.77597
KLHL41	3.79728	3.6922	3.689	4.60181	4.3487	4.17178	3.76843	3.84028	4.00089	4.27749	3.64045	3.92442	4.04388	5.0754	4.26044	3.95305	5.36479	3.94262	4.37699	4.04328	4.47031	4.39111	3.89747	4.3679	4.01404	3.8079	3.84411	3.61054	5.03833	4.13106	4.09041	4.11264	3.78303	3.88558	3.95188	4.10158	3.97237	4.17218	3.90601	4.21187	3.96874	3.86704	3.78965	4.12889	3.74627	4.32868	3.98019	4.40053	4.08818
SIRPB1	6.86913	6.49188	6.28509	7.12645	7.10886	6.47212	6.29245	6.76854	6.57169	7.07443	6.57473	6.66398	5.987	6.25903	6.27685	6.54214	6.63231	7.00117	6.29117	5.9038	6.53456	6.35533	5.98924	6.08006	6.32377	5.53325	5.23948	5.43101	5.66727	6.2224	6.97919	5.21555	5.86179	6.00854	6.55433	6.54382	6.5199	6.85283	5.6934	6.56282	6.37477	6.97425	6.41638	6.6325	5.9309	6.44905	6.5103	6.39894	6.0963
CDKN3	6.85584	5.83952	6.8191	6.12489	6.23465	6.51748	5.64621	6.41098	6.32485	5.77863	5.86476	6.70649	5.65959	6.91046	7.70328	6.91046	8.77079	6.06799	6.54722	5.86575	7.49656	6.38318	6.86371	6.03178	5.99042	5.45428	6.96687	5.47159	6.26254	7.01203	6.72547	6.10677	6.06062	5.16571	6.53082	7.24135	7.12102	6.9948	7.56539	7.2066	7.68793	6.74749	5.50502	6.96973	7.54499	5.83924	5.48797	6.56189	5.82299
CLEC4M	5.7577	4.55393	4.78728	4.65607	4.61983	4.75656	5.51677	5.27821	4.66559	4.81916	4.83482	5.9438	5.20242	4.85045	4.6696	5.35665	5.62524	4.76072	4.61721	4.8216	5.27534	4.79174	5.37438	4.78605	4.67109	4.85373	4.7607	4.69292	4.56307	4.8864	4.76807	4.49071	4.73683	4.72805	4.89818	5.95608	5.13553	4.74287	4.65134	5.01704	4.70586	4.85003	4.92525	5.17774	4.79152	4.69178	4.59298	4.74421	4.9348
CCL26	5.77774	5.08849	4.83542	4.27548	5.06715	4.72397	5.61414	6.00977	6.77869	5.08588	5.11244	5.81141	6.03027	6.31963	4.6026	6.37421	5.33983	5.77985	4.86048	5.266	5.80891	5.43641	5.69882	5.61723	5.50723	5.7899	5.39453	5.54248	5.69383	3.87064	5.71355	5.27019	5.57963	6.53198	5.54042	6.61713	6.29128	6.56905	5.13429	5.22539	5.16997	4.96805	5.50129	5.84219	5.86934	5.73618	5.78367	4.89116	5.24311
ABCA9	6.03238	5.4262	6.86341	6.57002	6.64619	5.81375	5.36554	5.46025	6.65753	6.36907	5.88802	6.08117	6.17506	7.10668	5.73285	6.00967	5.412	6.23135	5.27541	5.79685	5.84124	6.70682	5.20637	6.67094	6.73402	6.12656	5.87099	5.92408	6.56491	6.61054	6.33637	5.58274	6.17035	6.97001	6.4552	5.7123	5.71197	6.3247	5.86394	5.76761	6.41167	5.73817	5.8212	6.51563	5.7486	7.0666	5.63151	5.34194	5.71187
KLF2	9.25898	9.28366	9.92245	9.15626	9.0071	9.07758	9.92225	10.3004	9.62732	10.0479	9.34811	8.50517	8.51026	9.33764	9.02906	8.88458	9.32641	9.22101	9.28956	9.25938	9.49995	9.12181	9.75527	9.04234	9.32417	10.1922	9.39041	9.40548	9.20244	9.27466	9.28053	8.36523	9.11476	10.2165	9.718	9.04092	8.81818	9.46123	9.01296	9.64615	9.32193	9.67808	9.17178	8.44867	9.3714	9.49672	9.68727	8.98272	9.1782
SEMA3A	4.67658	4.7144	4.23216	4.16822	4.24156	4.99917	4.10305	4.33582	4.57689	4.58948	4.50225	4.28566	4.902	4.24196	4.26324	3.98171	4.06229	4.94209	4.1627	4.91544	4.2713	4.12139	4.14009	3.98899	4.80455	4.10838	4.71204	4.7699	4.16503	4.56927	4.14775	4.72935	4.70675	4.20864	4.27001	4.93567	4.3307	4.08179	4.01622	4.03543	4.02103	4.81086	3.94457	4.37668	4.41931	4.06142	4.4212	4.18428	4.74486
CDR1	2.7607	3.36912	2.6691	2.85664	2.84306	2.59479	2.99618	3.04585	3.05952	2.78965	2.75893	2.9434	2.9507	2.81061	2.83946	2.69893	2.77846	3.1671	2.75347	3.0577	2.71281	3.15876	2.86859	2.92685	3.1265	2.897	2.89715	3.17945	2.86715	2.85826	2.78128	3.65469	3.03072	2.62038	2.79572	2.96553	2.80995	2.85379	2.76042	2.92176	2.93273	3.26438	2.96488	2.87547	2.64381	2.73535	2.90698	2.85939	3.14294
TUBB4A	3.99324	4.09069	4.19637	3.92662	3.79348	4.13467	3.94642	4.21228	3.98915	3.88	3.90087	4.02052	3.87103	4.3736	3.95067	4.1064	4.1867	3.77075	3.98122	4.03679	4.00516	3.72178	3.88136	3.82869	3.87851	4.10949	4.09702	3.79644	3.90578	4.03845	3.43173	3.49125	3.78429	3.73671	3.92825	3.83034	3.86119	3.90362	3.96059	3.86287	4.06503	4.04674	4.292	4.33574	3.83716	3.97234	3.72314	4.01844	4.26459
BTN3A3	8.43553	8.75075	8.47197	7.95188	8.214	8.22727	8.68265	8.05165	8.75239	8.51322	8.34928	8.0834	7.81196	7.98745	8.10655	7.90849	8.59062	8.40401	9.35522	8.7562	9.08362	8.38624	8.62601	9.09014	8.26536	8.97679	8.56862	7.92642	9.00045	8.12212	8.1409	7.43536	8.39125	8.51414	8.42816	9.25366	8.8501	8.3951	8.74276	8.09713	8.15838	8.65671	7.97118	7.52384	8.16983	8.20572	8.18134	9.39114	8.77193
CORO2B	8.16412	7.3655	6.54253	7.08598	7.59449	6.66827	7.27038	7.61588	7.94117	7.62231	7.48499	6.4743	8.48962	7.58116	8.96963	6.85762	7.81348	7.43455	7.40754	7.46112	7.53212	7.45293	7.20249	7.10502	7.19725	7.35698	7.58162	7.08012	7.31102	7.45488	7.43996	7.74929	8.11902	7.1402	7.10976	6.95825	7.0431	7.34482	8.13233	6.72703	7.74962	7.8184	7.07098	6.97894	7.85387	7.27452	8.20351	7.41238	7.4262
NDC80	5.39258	4.59661	5.8283	4.67092	5.32032	5.45225	4.67754	5.23525	5.66177	5.08987	4.61791	5.33621	4.52159	5.10557	7.04698	6.3214	7.42254	5.02254	5.959	5.14341	6.88278	4.75725	6.22452	5.31087	4.99444	4.81947	6.68087	5.17973	5.40951	5.12351	5.90684	5.17155	5.40636	4.78976	5.21027	6.08189	6.43286	6.54686	6.56911	5.98558	6.73359	5.63324	4.72149	5.03885	6.44514	4.38752	4.56528	5.91922	5.12395
CDC42EP2	8.77048	8.27012	7.6859	8.60967	8.32453	7.96824	7.85509	8.16436	8.19815	7.88897	8.06207	7.9333	8.71303	8.65992	8.38605	7.8737	8.08289	7.98185	7.80546	7.84656	8.03712	7.92835	7.864	7.59692	7.86388	7.67176	7.7897	8.28827	7.81084	8.55699	7.63447	8.38893	8.09699	7.69049	8.0018	8.0888	7.93065	7.77235	8.25258	7.39275	8.19594	8.22237	7.97452	8.19378	8.13665	8.34254	7.63801	7.91687	7.86011
LINC01224	4.16019	3.90686	4.1725	4.1865	4.05879	4.08933	4.16878	3.88191	4.23822	4.05955	4.06828	3.94187	4.07341	4.04491	4.13299	4.10304	4.14933	4.21302	3.99293	4.00991	4.01766	4.30888	4.44335	3.99977	4.52934	4.27824	4.02867	4.10009	4.01506	3.88173	3.97458	4.09832	4.09413	4.07655	4.03719	4.042	4.19475	4.40547	4.21512	3.80855	4.05494	4.16537	5.82809	4.01799	4.04411	4.22644	4.0927	4.07301	4.01564
CLEC10A	8.1958	7.21659	6.87972	6.33889	7.26155	7.41922	6.56338	6.49715	8.12367	7.49566	7.03302	6.53181	7.42408	8.11004	6.93222	6.95511	7.49476	7.54339	8.32664	6.49771	8.3678	6.83147	7.63575	7.67995	7.17572	6.31683	7.95078	7.31144	7.85369	7.54369	7.24136	6.85629	7.48797	6.70739	6.97263	7.29531	7.99489	6.90493	7.06767	7.77148	7.35755	7.27378	7.42841	6.58601	7.18093	6.22925	6.60765	8.14032	6.51529
FST	7.32141	7.16873	7.47775	8.31375	8.11385	7.18958	7.76136	7.40443	7.36194	7.73355	7.64891	7.92136	7.19884	9.18175	6.81592	8.82221	6.99994	7.63167	7.09018	6.87253	6.975	8.14708	7.00851	7.02992	7.40894	7.42027	7.43937	7.17062	7.47233	7.92702	7.18551	7.02137	6.86595	8.37316	9.15978	7.31484	7.17079	7.44584	6.97866	7.15763	7.46767	7.34579	7.41452	7.95616	7.33836	7.29939	7.18862	7.2604	6.76794
CLGN	5.24461	8.30615	4.88948	4.50955	5.21551	4.86015	7.00822	5.163	5.21185	6.90211	5.34758	5.53768	5.07254	5.52412	5.82358	5.11085	5.58278	5.00189	6.65086	6.95936	5.69625	4.61989	5.59355	5.97563	5.74245	5.64453	5.94704	6.78194	5.66484	4.97412	6.52156	7.509	5.40554	4.73558	4.05945	6.46101	6.02162	5.45742	6.89384	4.85621	7.00144	6.0696	5.89417	5.19418	7.07386	5.70596	7.00404	6.64513	7.02742
CEACAM5	9.7758	6.51218	7.26367	7.59724	10.8526	9.35539	6.6606	7.4828	7.73374	7.41811	7.33772	9.615	9.90676	7.62482	10.1459	7.35554	8.3267	8.11466	7.54924	7.14678	8.29695	9.53165	9.27179	10.2357	9.2481	8.25033	8.55193	7.69023	6.94945	10.7526	6.5683	6.86616	6.32756	6.00227	6.7531	7.45133	7.69293	8.2141	9.37177	9.77233	8.1272	9.0088	8.28074	6.96261	7.41515	6.96263	8.55497	7.81063	7.44266
CAP2	8.12224	7.71459	6.80967	7.4317	7.66708	7.44437	7.89212	7.21964	7.37915	7.48432	7.69465	7.38774	7.41603	6.2019	7.28078	7.4108	7.81523	7.5501	7.68942	7.9321	7.54523	6.87775	7.69015	7.45466	7.48513	8.03906	7.10582	7.4787	7.47497	7.27409	8.25994	7.80225	7.59515	7.23222	7.06458	8.07427	7.53879	7.20832	7.58285	6.62707	7.76246	7.2747	6.46431	7.40095	7.36863	6.96312	8.25762	7.73854	7.91549
SEMA4B	9.0013	10.1371	9.76829	10.1867	9.59778	9.59823	10.0412	9.30889	9.00827	9.29204	9.43525	10.448	9.64325	10.2395	8.9441	9.70222	9.52888	9.58061	10.3206	9.58594	9.24872	9.92974	9.29111	9.5775	9.97199	9.11764	10.3558	9.90644	9.50949	10.9225	9.94645	9.75238	9.04106	9.21339	10.1454	9.57064	9.49884	9.50808	9.12121	9.76739	9.06548	9.91182	10.2237	10.5974	9.65905	10.4496	10.2661	10.3599	9.61336
SEMA3C	8.03144	8.29826	7.17662	7.92172	7.80595	7.7038	8.09923	7.72401	7.52174	7.52296	7.81098	8.08463	8.40989	7.98366	8.59621	7.81431	7.90748	7.62253	8.13582	8.45779	7.78324	7.95305	7.96602	8.08945	8.55232	7.95348	7.99495	7.91059	8.27308	7.6887	8.1406	9.1846	8.61453	7.57582	7.00311	8.19383	7.48325	7.7932	8.27038	7.89843	8.56342	8.20667	7.56674	8.08276	7.68023	8.17542	8.23975	8.1132	8.40379
RNASEH2A	8.15867	7.88287	7.32321	7.22542	7.62952	7.70535	7.97492	7.89725	8.13411	7.62816	7.33552	7.73319	7.60054	7.32243	8.58599	7.36525	8.39615	7.70568	8.37552	7.90296	8.07695	7.06328	8.25899	7.88954	7.53077	7.82907	8.5287	7.7611	7.5546	7.45747	8.06409	8.08693	8.12671	7.34688	7.36561	8.19704	8.01508	7.92756	8.2611	7.83782	8.20601	8.12273	7.60476	7.10853	8.16114	7.25669	7.87835	8.37836	7.85663
BATF	8.4667	8.74592	8.34473	8.93084	8.66025	8.45096	8.21923	8.3217	8.12284	8.05785	7.90671	8.47238	8.02092	9.55924	7.70726	8.72247	7.95103	8.14123	9.23761	8.22404	8.28464	9.0192	8.06314	8.14719	8.21633	8.18484	8.471	8.53795	8.24121	9.73175	8.56616	8.27695	8.36863	8.16907	9.34597	8.19889	8.07231	7.86234	7.58652	8.18796	7.93336	8.30716	8.31749	9.57715	8.59382	8.09018	7.99143	9.34534	8.42662
PROCR	8.77009	8.7503	8.64938	8.37559	8.32607	8.72464	7.95573	8.19966	8.61306	7.78443	8.3696	8.2351	8.83746	8.15494	8.46545	8.74124	8.90371	7.9607	7.30082	8.87324	8.81072	8.27688	8.85618	8.05826	8.8081	7.07171	8.96353	8.73588	8.60639	8.4168	8.31654	8.6893	8.73804	8.31773	8.41512	8.97853	8.48468	7.52409	8.11056	7.98679	8.65145	8.79546	8.82829	8.58725	9.2802	8.42544	7.93505	7.26165	8.85478
AGR2	8.92672	9.85173	9.82728	8.23595	9.13983	9.06162	9.86048	9.27574	9.35817	9.22774	9.18854	9.70314	9.72805	9.90235	10.6861	9.95772	9.9717	9.37917	9.7265	10.1217	9.94185	7.89596	9.76319	9.3879	9.5374	9.34389	10.7375	9.56171	9.41187	8.86802	9.71636	9.8248	9.86583	7.84653	9.11146	8.9307	9.36852	9.8348	8.79998	8.61028	10.0336	9.78383	10.4019	9.13941	9.69224	9.1872	10.0883	9.70504	10.0162
CEL	5.21571	5.20034	5.47924	4.92484	5.03392	5.14384	5.28814	5.13589	5.4577	5.28776	4.92415	5.00673	5.42182	4.92585	4.75981	5.3668	4.91804	5.04412	5.94585	5.29229	5.29458	5.19434	4.99525	5.21171	5.05363	4.98593	8.07111	5.23663	5.32141	4.89818	5.17929	4.96411	5.21862	5.22063	4.9845	5.09186	4.9565	4.88238	5.12645	5.21045	5.46796	4.90649	5.14943	5.03427	5.01151	5.31134	5.6699	6.07038	5.36452
SLC19A2	11.427	10.785	11.4305	11.5094	11.3144	11.1041	11.0548	10.3614	10.4778	10.6976	10.1857	10.5571	9.71718	12.1309	10.9945	10.9616	10.6271	10.4786	10.8111	9.94731	9.75635	10.8297	10.4306	9.69014	10.9793	10.6301	9.32248	10.6738	10.8112	10.8507	10.2645	9.59626	10.1558	10.8606	10.5333	9.53618	9.92031	11.1415	10.1172	10.2581	11.2579	11.0142	10.7762	10.707	10.7354	11.3543	10.4965	10.8087	10.0299
OLFM4	5.4925	4.19209	4.34741	6.31802	4.07546	8.10748	4.89231	3.90356	4.03782	5.89734	4.76302	4.09093	4.77042	4.16064	6.78965	5.78973	8.74258	5.78288	4.24455	4.15026	9.54103	4.44345	7.45722	4.00293	3.58315	3.87813	4.57225	5.21261	8.69326	4.65325	6.78552	5.1239	4.35204	6.00654	3.66653	4.35377	4.89466	8.28942	4.45611	3.50046	5.86658	6.64421	5.88219	5.08225	3.6829	5.13289	4.37296	4.14997	3.87482
CXCL13	3.50881	6.27909	7.84421	4.47117	5.73645	5.72559	5.87675	6.71348	3.52994	6.49901	6.83159	5.24805	5.85853	7.51682	4.31113	5.65483	4.14205	4.47128	8.65192	6.45588	4.14556	5.57639	5.12453	8.29815	3.45426	6.45364	10.607	5.05331	7.00593	3.42471	5.09503	5.3039	6.25434	5.63801	6.54472	4.78437	7.11369	6.39994	4.15918	6.49354	5.83246	4.87923	8.5286	6.79674	6.89699	5.60699	6.24608	8.92126	6.61071
DPYSL4	4.84347	5.11609	5.48715	5.73014	5.20493	5.69272	5.47488	5.49138	4.89125	5.24945	5.35441	5.01714	5.40003	5.32705	5.61021	5.40566	5.37718	5.44023	4.98914	5.51087	5.32712	5.47394	5.30647	5.15587	5.06367	4.92697	5.09094	5.07357	5.31496	5.03455	5.6118	5.68688	4.98614	4.92718	5.47846	4.87004	4.79002	5.38122	5.31581	5.27628	6.20011	5.03279	5.83206	5.48871	5.09027	5.6769	5.55757	5.2291	5.62817
GNLY	7.8538	7.95081	6.64593	8.22792	7.54144	7.02642	6.72142	7.62788	7.02196	7.64883	9.37233	8.23199	7.29702	8.15345	7.93663	6.53055	8.20479	8.256	7.54221	7.182	8.40744	8.96786	8.80089	7.32031	6.86749	7.81575	6.33059	6.78336	8.29205	8.01573	7.5971	6.41656	6.45984	7.50148	8.16585	8.48554	8.21931	7.31063	9.19015	6.89705	7.2636	8.35437	6.52391	7.10896	6.55436	7.42866	7.09635	7.3342	7.1444
COLEC10	4.57329	4.03148	4.28061	4.39819	4.50294	4.7299	4.31756	4.38277	4.05801	4.42083	4.11418	4.02389	4.21596	4.05476	4.16272	4.38941	4.71403	4.82003	3.7099	4.47269	4.76163	4.4183	4.58756	3.9557	4.33687	4.89459	4.13905	3.9806	4.72865	4.36388	4.41527	3.95911	4.3706	4.39198	4.6693	4.83888	4.45472	5.19482	4.3711	4.32906	3.87601	4.07911	4.18706	4.65956	3.96474	4.00954	4.33026	3.7534	4.49598
SCGN	5.56157	5.76024	5.32108	5.65162	5.53165	5.21089	5.56599	5.33972	5.2787	6.37587	5.23103	5.36587	5.43385	5.86458	5.20429	6.13533	5.77121	5.4858	5.62059	5.72255	5.41013	5.40426	5.64368	6.02895	5.54039	5.34562	5.86159	5.17914	5.40047	5.42884	5.83057	5.37405	5.42499	5.49604	6.29216	5.20276	5.53393	5.63866	5.2767	5.30492	5.99604	5.23833	5.60427	5.29564	5.51139	5.38823	5.98854	5.69202	5.74635
SMC2	6.88598	6.43535	6.78494	6.59311	6.87028	6.98884	6.97156	6.99098	7.1201	6.80028	6.99355	6.96244	7.02424	6.73369	7.74955	6.7721	7.8418	6.76206	7.39945	6.76054	7.02273	6.83688	7.40509	7.36544	7.02357	6.80586	7.34374	6.72849	6.77736	6.73452	7.0547	7.31621	7.1391	6.80116	6.58065	7.37706	7.42889	7.30104	7.46564	7.2326	7.26244	7.42184	6.70552	6.496	7.25611	6.66267	7.0849	7.32926	6.72436
P3H4	7.2481	8.02541	7.66321	6.6148	6.77562	7.23343	7.68979	7.24483	7.57409	6.86186	7.33928	7.20651	7.4799	6.77981	7.5482	6.95498	7.81349	7.16394	7.27892	8.05705	7.12238	6.92141	7.39824	7.12032	7.2967	7.27555	7.75568	7.70504	7.35485	6.94734	7.16647	8.23135	8.16131	7.03835	6.97149	7.36148	7.02618	7.09156	7.9118	6.86536	7.37981	7.71805	7.47215	6.76861	7.87474	6.54611	7.75715	7.24101	8.04165
SPAG5	6.98423	6.41997	6.89281	6.70196	6.89764	6.67501	6.4985	6.64493	6.79306	6.33663	6.40669	6.72163	6.61338	7.17768	7.46978	6.75855	8.02031	6.34463	7.09806	6.64953	7.10028	6.54891	6.94568	6.31476	6.07828	6.18141	7.16746	6.12643	6.63834	6.63964	7.03095	6.32828	6.51934	6.20097	6.68304	6.92279	7.18041	7.01878	7.24122	6.83967	7.52229	6.71324	6.24292	6.6446	7.33189	6.63611	6.5411	7.1201	6.57708
CENPE	4.77748	4.34791	5.16012	5.20347	4.67466	5.14115	4.71391	5.12242	4.74906	4.15682	4.96411	4.79583	4.71421	4.73256	5.79713	5.40126	6.62151	4.9801	5.23874	4.37397	5.72282	4.89713	5.53547	4.93982	4.85834	4.65526	5.67043	4.51384	5.00269	4.80374	4.89545	4.39717	4.83967	4.86521	4.79705	5.20054	5.54576	5.78233	5.61459	5.45296	5.88469	5.53619	4.79702	5.00934	5.48533	4.44323	4.37751	5.24806	4.40076
CENPF	4.92748	4.38825	4.7196	4.57024	4.79878	4.66854	4.66975	4.70701	4.62832	4.45434	4.42913	4.64085	4.47645	4.56725	5.55427	5.02549	6.52383	4.49056	4.98356	4.67156	5.21227	4.52651	5.14738	4.77132	4.57471	4.65808	4.96664	4.51431	4.56055	4.76365	4.7332	4.41375	4.67025	4.26701	4.52782	4.81651	5.05642	5.0158	5.11551	4.939	5.86295	4.85098	4.55753	4.63228	4.98218	4.36786	4.446	4.92273	4.65836
POSTN	9.72263	7.8419	9.69766	8.94248	8.95608	8.65146	8.81476	9.10532	9.39568	9.57315	8.82809	8.74215	8.31212	7.44772	8.21554	7.55246	9.41037	8.73673	9.27377	8.72206	8.84375	9.81806	9.05171	9.01854	9.94072	8.87347	9.25226	10.1233	8.92074	7.90245	9.21875	9.2762	7.92241	9.36955	9.81696	7.0749	9.40725	7.75803	8.83743	8.95804	8.74312	8.27257	9.12676	9.80602	9.49495	8.17803	8.72984	9.04465	8.66032
RASL10A	6.12082	6.1937	6.12039	6.74429	6.37433	6.18482	6.44994	6.40192	6.09638	6.11609	6.29119	6.56943	5.94003	6.13499	5.96147	6.21074	6.29842	6.25748	5.93384	6.14669	5.94479	6.12331	6.27313	5.892	6.32787	6.08402	5.99512	5.91412	5.82135	6.24955	6.24363	5.48982	5.9422	5.99419	6.31872	6.33325	5.95673	6.35445	5.78396	6.05376	5.88992	6.15182	6.14639	6.33594	6.05979	5.87165	5.54682	5.83706	6.13788
RAD51AP1	6.56491	5.92553	6.20672	6.12747	6.40276	6.30474	6.02286	6.50599	6.45868	6.0838	6.11217	6.07608	6.33895	6.15866	7.94631	6.634	7.69805	6.37083	6.45099	6.07899	7.31267	5.84251	7.09459	6.4758	6.19274	5.72797	6.94088	5.97719	6.1371	5.84547	6.68624	6.07398	6.5584	5.83055	5.90848	6.75435	7.16948	6.92853	7.23414	6.798	7.10947	7.42121	5.60114	6.17177	6.9588	5.65171	5.82876	6.45095	6.07541
IGF2BP3	5.59185	5.11138	4.64526	4.58472	4.6794	5.04987	4.66353	5.06428	4.86224	4.49881	4.70063	4.97895	5.67748	4.37898	7.05816	4.58128	4.67943	4.77595	4.56707	4.56742	5.15529	4.54353	5.96876	4.52865	5.02347	4.4063	4.33636	4.63888	4.8047	4.77339	5.16351	5.54106	5.78017	4.99774	4.29519	5.50788	5.1226	5.0416	5.10584	5.07612	5.664	4.9503	4.75368	5.30355	5.28374	4.58842	4.56148	4.64946	4.72629
SCGB1D1	3.10666	3.15199	3.20192	3.2776	3.38073	3.00701	3.11514	3.41385	3.13093	3.26709	3.31372	3.01251	3.09224	3.15315	3.20856	3.43285	3.17013	3.07668	3.23086	3.4405	3.06262	3.10681	3.20938	3.48572	3.42077	3.52409	2.86465	3.38234	3.10181	3.20566	3.17369	3.07033	3.28392	3.01882	3.28901	3.19318	3.21295	3.17145	3.20627	3.49594	3.57664	3.03126	3.22252	3.18513	3.34832	3.1823	3.175	3.25828	3.39857
DMRT2	5.72472	5.0156	5.10573	5.09342	5.57309	5.09675	4.83698	5.05071	5.69545	4.89121	5.4163	5.22248	6.21741	5.3988	4.96569	5.2572	5.00199	5.56308	4.98326	5.79446	5.5527	5.17869	5.28167	4.55802	5.08012	5.23746	5.27858	5.41126	4.9068	5.89782	5.05339	4.80665	5.06397	5.1395	5.32509	4.73833	5.31248	5.16549	5.44055	4.98274	5.06343	4.95098	5.39641	5.53949	5.21986	5.34816	5.36694	4.95748	5.68191
KLF1	4.41593	4.75535	4.33305	4.31829	4.36426	4.43525	4.4918	4.69941	4.53022	4.32639	4.25851	4.76144	4.50619	4.24027	4.59133	4.09654	4.41047	4.34922	4.23188	4.21245	5.04457	4.35524	4.57665	4.37384	4.16457	4.84318	4.31367	4.63908	4.62637	4.37738	4.64764	4.28267	4.48825	4.34527	4.59387	4.97547	4.43012	4.89273	4.41296	4.65482	4.40951	4.19379	4.48963	4.34307	4.21453	4.57354	4.59514	4.3093	4.21142
CXCR6	6.43237	6.50595	6.48284	6.75911	6.78483	6.46139	6.49278	6.36409	6.18752	6.72018	6.19119	6.04917	6.23477	7.16044	6.0841	6.66959	5.85516	6.78063	8.8	6.19331	6.97431	6.55621	6.31248	6.45972	6.22248	6.75969	6.3797	6.83681	7.35923	6.75406	6.69846	6.1634	6.48647	5.89329	6.66445	6.10989	6.39408	6.23418	6.45691	6.47425	6.29775	6.4824	6.50853	6.95103	6.2248	6.26963	6.07466	9.2198	6.28405
CD226	5.3099	4.65506	4.56768	4.49522	4.87331	4.75656	4.5595	4.50035	4.4322	4.81338	4.44969	4.49983	4.13548	5.20399	4.2157	4.8853	4.37299	4.53394	5.64099	4.26472	4.38292	4.74941	4.74531	4.5295	4.85568	4.69541	4.49856	4.4802	4.70457	4.52847	4.95699	4.34737	4.97182	4.57953	5.05617	5.72543	4.28262	4.57113	4.63863	4.25447	4.39256	4.15147	4.4802	4.6398	4.38731	4.37967	4.35161	5.73612	4.29616
TNFSF13B	9.83646	10.3863	9.5194	10.2371	10.3303	10.0583	9.48514	10.1672	10.0338	9.97084	9.97136	10.0935	9.39583	10.3713	10.1815	10.013	10.3953	10.2166	9.78146	9.88089	10.6443	9.77962	9.8606	10.2065	9.59253	8.88615	11.1318	9.6823	9.82704	10.7687	10.4366	9.44552	9.8682	9.70141	10.0807	9.95548	10.2701	9.7891	9.70393	9.76942	10.1005	10.195	9.88813	9.45972	9.63046	9.28197	9.55597	9.80962	9.83923
CSPG5	7.84328	9.04748	7.63889	7.48002	7.62913	7.60313	8.89407	8.06814	6.65023	7.19426	7.87145	8.65072	8.45198	8.25639	7.45361	7.56109	7.62891	8.29032	7.62288	8.27856	7.90734	7.01113	8.03157	8.18104	8.25673	7.06732	7.32699	9.4814	6.97617	6.92574	8.49944	7.61786	8.00621	7.06525	6.97541	7.69099	7.62581	6.88215	8.81447	8.06628	7.49351	8.61364	8.88477	7.8308	8.61717	6.85836	8.06079	7.79739	8.24113
PNMA2	7.47617	7.73139	7.31057	6.98643	7.05119	7.71543	7.33708	7.65227	8.00945	7.58589	7.02719	6.8016	7.30185	7.32643	7.02979	6.90219	7.23337	7.05331	7.9371	7.17381	7.01192	6.49208	7.75794	7.53919	7.773	6.96289	7.31203	8.03637	7.64899	7.34549	7.79334	6.87446	7.58306	7.32775	7.41871	7.72826	7.56118	7.56111	7.82314	8.35566	7.63713	7.73757	7.20842	6.89936	7.86178	7.08803	7.36516	7.96009	7.14619
CCT6B	6.47675	6.33356	6.51521	6.54943	7.00041	6.425	6.91108	8.13586	5.93256	7.26955	7.26089	7.12961	7.02771	7.14791	6.74243	7.58681	6.25566	7.58966	7.06422	6.27065	6.91386	7.19076	6.73915	6.36609	7.04032	6.95827	6.74402	6.36978	6.51323	7.15492	7.09185	6.76361	6.6279	7.21926	6.13785	5.33781	7.19024	7.36961	7.32371	7.01939	7.32458	7.03455	7.06727	6.89272	7.06741	7.05589	6.62779	7.33874	6.36455
CORIN	5.9296	5.31393	5.41824	5.73597	6.11289	6.05256	5.70744	5.11246	8.04877	5.39956	6.20169	5.20601	5.76415	5.42733	5.65594	5.43443	6.11606	6.18808	6.83676	5.87336	7.22388	5.17123	6.27266	5.77865	5.58894	5.90036	5.18873	4.65519	5.69862	5.72803	5.64114	4.19497	5.18758	5.67247	6.19326	6.39457	6.60917	6.1312	6.13277	6.55618	6.18382	5.74758	5.12485	6.20116	4.84713	5.61952	5.71966	6.91068	5.86771
CETP	5.84862	5.03002	5.38743	5.57772	6.02854	4.91202	5.2972	5.66725	5.41133	5.80441	5.53323	5.65399	5.7842	6.1435	7.52233	5.79447	6.08745	5.20859	4.8142	5.62498	6.82245	5.95298	5.44896	6.45902	5.04903	5.86044	6.84092	5.57657	6.04952	6.54495	5.61794	5.1069	4.91389	5.73828	5.54393	5.5263	6.12664	5.47977	5.62851	5.35363	5.30113	5.73432	5.11022	5.59006	5.57886	5.01935	5.33679	4.82749	5.62094
TBR1	3.04002	2.942	2.89259	2.89426	3.16397	3.10299	2.98189	2.81605	2.97788	2.76681	2.95685	2.95795	3.05727	3.03807	2.83594	2.83875	3.11334	2.83239	2.74368	2.77995	2.84377	2.99093	2.78275	2.76098	3.29034	3.05611	2.80863	2.57953	2.89977	2.84987	2.82904	2.99369	2.82211	3.0213	2.65484	2.87108	2.97462	2.90503	2.84193	2.78215	2.95099	2.8796	3.04818	2.82536	2.87909	2.96693	2.63288	2.75328	2.8493
NRG3	5.2111	5.36632	5.04032	5.6595	5.09443	5.32352	6.30085	5.06225	5.79782	5.86737	6.22064	5.73558	6.0109	4.84961	4.84571	5.95251	5.63518	6.09824	5.18525	5.5143	5.46243	5.99749	5.38851	5.2461	5.64855	5.46265	4.35138	5.17814	5.13379	5.03979	5.36403	5.37789	5.35173	5.51429	5.42904	5.76535	5.70786	5.56307	4.61351	4.96342	5.68142	4.82309	5.21691	6.34848	5.15224	5.57261	5.50308	5.24018	5.55941
PLK4	3.50541	3.39774	3.5291	3.60486	3.60978	3.4038	3.43477	3.68881	3.60495	3.33342	3.54127	3.53826	3.60749	3.46458	4.09002	3.67769	4.21983	3.6255	3.47057	3.5552	3.92336	3.43443	3.58942	3.45138	3.33042	3.19711	3.76422	3.26781	3.49849	3.50525	3.71596	3.50648	3.58281	3.44659	3.2672	3.59645	3.83622	3.94982	3.65371	3.67781	3.83122	3.69208	3.37189	3.39005	3.67499	3.30657	3.48039	3.58801	3.50848
RFPL3S	2.94962	2.82213	3.74811	3.10244	3.08448	3.0672	2.86395	3.18446	3.47145	2.8545	3.43542	2.99023	3.06537	3.53266	2.83777	2.71257	2.87698	3.15839	3.20345	3.10097	2.84658	2.90953	3.11543	3.17749	3.23003	2.76642	2.80272	2.99241	2.89013	2.60125	3.06284	2.82106	2.97386	2.98121	2.909	2.92777	2.80364	2.71568	2.98885	3.2359	2.84722	3.00358	2.81244	3.02711	3.08402	3.27364	2.87966	3.2404	3.1221
RFPL1S	3.00514	3.2819	3.47005	2.72979	3.20901	3.25689	3.28938	3.29122	3.38984	3.167	3.27789	3.3119	3.40102	3.25342	3.81899	3.11761	3.49791	3.71978	3.71433	3.00861	3.34636	3.43317	3.41452	3.82122	3.02051	3.03484	3.75951	3.15632	3.45448	3.13617	3.48989	3.11809	3.24621	3.20064	3.3908	3.21184	3.60249	3.24288	3.65324	4.00561	3.02231	3.10107	3.13179	3.44371	3.51063	3.06836	3.0233	3.72312	2.86923
KLRA1P	3.35671	3.3809	3.8856	3.54988	3.41487	3.35437	3.49915	3.70552	3.31566	3.81585	3.43781	3.28845	3.40405	3.29025	3.61192	3.46792	3.20207	3.72865	3.7819	3.27007	3.51048	3.54701	3.41059	3.42041	3.61004	3.61437	3.85583	3.74245	3.12953	3.66077	3.55399	3.23818	3.55028	3.87243	3.08103	3.5033	3.40325	3.64782	3.32181	4.09537	3.34272	3.30719	3.55055	3.63255	3.35671	3.36831	3.21664	3.76965	3.54512
CHL1	5.24855	5.83736	4.64129	5.51797	5.48667	5.52151	4.97413	4.55004	5.526	4.98205	5.96123	4.66521	5.14542	5.18303	4.35026	4.90844	4.9815	5.62642	4.40645	5.23873	5.549	5.33892	4.94104	4.80669	5.03348	5.07418	5.27872	4.46874	5.42195	4.76653	5.21463	4.84671	5.36062	5.54007	5.43351	6.26174	5.10515	5.16289	5.1271	4.39764	4.95273	5.77311	5.82154	4.99926	4.85653	6.29983	5.10241	4.42275	5.16154
CAPN9	7.67103	6.316	7.10658	7.55714	7.90188	6.77943	6.53459	6.44811	7.52366	6.12647	7.11705	7.62485	6.74345	6.1655	7.26086	5.87898	8.02173	7.10259	6.85573	5.40068	6.95784	6.72666	7.60284	7.08832	5.83077	6.4334	5.76769	6.90237	7.19177	7.13632	6.3492	5.71642	6.86169	5.20086	6.08998	8.02718	4.85664	7.0921	5.82929	8.14863	7.82354	7.00708	6.12794	6.95125	5.4698	6.89945	7.42537	6.826	5.32425
NES	9.17512	9.20913	7.8773	8.38108	9.16738	8.83397	8.56138	8.83515	8.85746	8.51984	8.74667	8.41354	9.52368	8.08128	9.20689	8.38463	9.10023	9.36402	8.1687	8.71906	8.91247	8.10901	8.75039	7.36765	8.51482	8.79558	7.0129	8.93015	8.31529	8.14844	8.70261	9.37981	9.14654	8.90043	8.72703	9.35258	8.99754	8.48719	9.15773	7.3087	8.99317	9.01532	8.49457	8.44088	9.00673	8.72391	8.99034	8.16944	8.7319
ZBTB6	4.94194	5.22271	5.08727	5.56825	5.31235	5.14913	4.83263	4.92792	5.21147	5.17246	5.45847	5.49361	5.60823	5.27486	4.826	5.28666	4.77332	5.49762	5.1628	5.06414	5.0567	5.32777	5.11727	5.19162	5.56716	4.68368	4.98446	4.83726	5.2252	4.78252	5.39519	5.17774	5.07232	4.76859	5.19584	5.43159	5.63723	5.53161	5.09319	4.90288	4.69817	5.0121	5.21965	5.29034	5.03531	5.26683	4.78756	5.20748	5.09241
SLC17A3	4.49825	3.94072	4.45839	4.49644	4.83487	4.50708	4.5142	4.50313	4.19264	4.27168	4.47966	4.23684	4.38139	4.38253	4.8156	4.84457	4.65241	4.624	4.1296	4.51228	4.46904	4.31162	4.45858	4.47799	4.64651	4.69223	4.29151	4.44629	4.22957	4.79987	4.18384	4.02441	4.26503	4.67738	4.50153	4.42243	4.5881	4.48829	4.80178	4.51528	4.33897	4.64441	4.32389	4.38145	4.41968	4.18117	4.27668	4.23446	4.51723
ZNF273	4.69985	4.35798	4.83243	4.72185	5.20256	4.76164	4.91303	4.80763	4.86421	4.93348	4.96945	5.10113	4.95188	5.06564	5.04568	4.81614	4.64853	4.8134	5.16975	5.56679	5.19407	5.07276	4.54345	5.60708	4.93331	4.84212	5.27804	4.40958	4.93113	4.84713	5.50195	4.88177	4.97439	5.1044	4.82588	4.68691	5.54013	4.8519	4.89029	5.069	5.48686	4.89095	4.87135	4.61389	4.87378	5.32696	5.31311	5.0567	5.31469
ZNF460	4.3898	4.08361	4.36714	4.24963	4.32555	4.29674	4.04104	4.37239	4.14597	4.09607	4.46777	4.39089	4.42752	4.86153	4.05779	4.09687	3.95646	4.0388	4.38726	4.09828	4.17624	3.92137	4.09003	4.1508	4.18473	3.99625	3.83292	4.23269	3.95291	4.81363	4.22316	4.2161	4.00315	4.24516	4.39513	4.17835	4.12658	4.29724	4.08967	3.99393	4.19615	3.99891	4.10354	4.36443	4.27077	4.28577	4.2072	4.32057	4.30135
CFTR	4.4667	4.72812	5.17849	4.69509	4.84033	4.96348	5.15129	4.88599	5.12268	5.0757	5.01935	4.83635	5.1016	5.76194	4.29441	4.96124	4.82815	5.19071	4.77732	5.00719	4.797	4.9219	4.88778	4.80731	4.83417	5.04693	4.9384	4.71253	4.30643	5.96186	4.94188	4.66502	4.74717	4.93996	5.04965	4.76469	5.07356	4.76589	4.2938	5.12087	4.67843	4.73912	5.34608	5.58646	4.57647	5.40496	4.83213	4.63053	4.91765
CYSLTR1	7.03457	6.42825	6.20422	6.43993	6.25904	6.83357	6.24825	6.59505	7.18236	6.93023	6.48791	6.14851	6.39325	6.49288	6.76689	6.84435	6.61559	6.8794	6.88532	6.70505	7.33065	6.74455	6.85437	6.36067	6.77473	6.96057	7.54695	6.34143	6.94129	7.74289	6.8093	5.81952	6.68144	7.07597	6.85597	6.22485	6.89469	6.86003	6.56656	7.26925	6.30137	6.90066	6.62897	6.45207	6.9641	6.31893	6.50868	6.77294	6.65476
GJB6	3.14292	3.58214	3.83638	4.42914	4.3093	3.34473	4.11894	3.49263	3.12208	3.32686	3.43785	3.99345	2.83054	4.27824	3.74057	3.9793	4.15858	4.13822	3.37103	3.55439	3.61042	3.03826	3.35709	3.2457	3.82331	3.38771	3.8571	3.35398	3.60107	4.44805	3.44524	3.21386	3.67527	3.23735	3.31211	3.16501	3.67196	3.38655	3.88386	3.59329	3.39538	3.40336	3.54811	3.55345	3.15657	3.69949	3.09139	3.24069	3.58996
HSPH1	8.50953	9.17555	7.86253	10.2714	10.2964	8.14404	8.04012	7.75364	8.28909	8.42212	9.06688	9.25926	9.32034	8.60258	8.20732	7.71863	8.35361	8.01461	9.77471	8.52743	8.63067	8.33589	8.18435	8.65001	8.16685	8.35916	8.15842	8.12948	8.45393	9.17267	10.0083	8.8091	7.87478	7.98571	9.64202	8.89149	8.20275	8.19997	8.00666	7.83813	8.1194	8.24125	8.3511	8.81037	8.12499	9.4019	9.06812	9.74254	8.52574
CPLX1	6.61186	5.69607	6.272	6.04244	5.5447	6.07999	6.14204	6.3937	6.99402	6.80592	5.84446	6.37168	5.80368	5.74331	5.6185	6.4389	6.2673	6.87155	5.52533	6.25512	6.13948	6.75215	5.43997	5.40742	6.28402	6.76607	6.10719	6.36996	5.94513	6.78531	6.0921	6.35339	5.58919	6.6493	6.72419	5.4171	6.24262	5.95801	6.0365	6.10938	5.60674	6.22985	5.49069	7.23309	6.36114	5.48463	5.57291	5.55515	6.25548
OR7E14P	6.27394	6.02906	6.34512	6.43692	6.02315	6.44785	6.51459	5.96647	6.2478	6.87757	6.54608	5.80438	6.15968	6.31278	7.15716	6.06815	6.7512	6.0271	7.59219	6.46196	6.29731	6.42225	6.49182	7.59433	6.183	5.89233	7.38271	6.58093	7.07552	6.81748	5.9659	6.08696	6.08744	5.9303	6.04958	6.09021	6.64159	6.55515	6.83378	7.29115	6.20054	6.59119	6.75857	6.77384	7.03438	6.31209	6.79757	7.54944	6.35145
ALDH1L1	7.02961	6.51131	6.90344	7.02305	7.22167	6.70533	7.06298	7.05985	8.03474	7.13934	6.90522	6.94622	7.04747	7.86029	5.97568	7.3969	6.88037	7.08121	6.46095	6.85702	7.13863	6.89627	7.09803	7.01626	7.04012	7.2545	6.8949	7.14725	7.30772	5.9614	6.89312	6.37429	7.05701	7.49604	7.28535	7.04775	7.30542	7.79353	6.77851	7.02917	7.46221	6.72417	6.97359	6.88546	6.87226	7.49897	7.29272	6.45259	6.89332
CCL27	4.10615	4.45016	4.04794	3.79145	3.95701	4.21786	4.11756	3.87659	4.12315	3.98584	3.60067	3.92469	3.81786	4.22237	3.90711	4.34263	4.05458	3.76863	4.0541	3.9625	4.01648	3.96854	3.92752	3.91688	3.77973	4.45931	4.50571	4.44509	4.24635	4.35303	4.02827	4.28962	4.0424	3.94557	4.3013	4.07518	3.8847	3.99242	3.78515	4.38221	4.13012	3.99429	3.69945	3.93088	3.98769	3.86893	3.93423	3.91861	4.03189
LILRB1	7.58744	7.89025	6.63319	7.24068	7.58871	7.67874	6.73831	7.60004	7.24639	7.47365	7.50972	7.46069	7.21473	7.99869	7.7363	7.43196	7.47564	7.94097	8.16252	7.68475	7.66462	7.78746	8.07325	7.86981	7.11994	6.85192	7.3344	7.23585	7.69601	7.49239	7.67816	6.86091	7.73535	7.29944	7.64777	7.75211	7.76568	7.4562	7.52841	7.85763	7.24955	8.45918	8.10722	8.13933	7.93042	7.06052	7.29785	8.19403	7.20052
ARID5A	8.82211	8.06822	8.07871	8.78208	8.50048	8.26322	7.76122	7.99423	7.79947	7.73305	8.09549	8.08205	7.81952	9.67291	7.37543	8.05089	8.26321	8.38015	8.41913	7.55713	8.00721	8.34268	7.42496	7.70167	7.78206	8.16692	7.06353	7.6185	8.41221	9.50486	8.09815	7.27057	7.22643	8.4851	8.51876	7.82358	7.81533	8.01353	7.64475	7.95178	7.79635	7.99702	7.74371	8.89711	8.17948	8.53972	7.89802	8.48868	7.59145
HCP5	8.55098	8.06454	8.08757	7.64533	8.2336	7.94031	8.77056	8.3862	8.5017	8.34867	8.22544	8.10998	7.77229	7.71905	7.87575	7.67416	8.47611	8.44191	9.41094	8.35073	8.62394	8.25107	8.32864	8.93913	7.75344	8.55008	7.74689	8.14477	8.85671	8.1743	8.34837	7.6495	8.47759	8.06468	8.42744	9.02739	8.86486	8.22632	8.23927	7.54131	7.77781	8.48517	7.65656	7.50587	7.99352	7.48733	7.71914	9.42259	8.40106
NMU	7.51763	6.71716	7.41673	9.98085	8.21447	10.9475	9.18521	8.60062	8.50006	7.05245	7.49592	8.12489	8.66846	6.72675	10.629	7.30244	10.1405	7.04371	8.10043	6.55933	7.71459	7.32222	9.71723	8.94758	7.26888	7.66	8.09674	9.24577	7.85133	4.97485	8.35555	5.52205	8.51871	8.59763	6.62464	6.63794	8.39348	7.9859	9.75009	10.6401	9.14798	7.49162	6.23041	7.80809	8.46823	7.8931	7.60161	8.10614	6.72202
CEACAM8	5.66182	4.90114	4.73253	5.59123	4.25565	8.31676	4.25891	5.04956	5.38196	5.10967	5.07698	4.9451	6.0368	7.96348	5.78254	5.49213	7.2776	6.27372	3.58017	4.9608	10.841	4.50556	6.5241	3.79645	5.0828	5.51359	5.22826	3.53519	6.45252	5.46652	5.09604	3.65467	4.17656	5.31893	5.86479	7.23261	5.52226	8.81519	6.0213	4.917	5.07937	4.88088	5.52016	4.89336	4.0962	5.44859	4.99722	3.37779	4.89717
NPFFR2	3.59599	3.45605	3.96393	3.55325	3.70502	3.5908	3.81053	3.5045	3.87229	3.59745	3.29807	3.57391	3.52138	3.90912	3.6945	3.51316	3.64006	3.62032	3.9728	3.88371	3.73779	3.82457	3.71232	3.61301	3.72897	3.79043	4.60946	3.98306	3.86308	3.79658	3.50827	3.79109	3.74627	3.61407	3.66703	3.57338	4.65009	3.65969	3.6738	3.6871	3.583	3.8673	3.96717	3.60533	3.85139	3.71619	3.70857	4.10759	3.9824
GPR83	3.30977	3.26591	3.7427	3.17776	3.53393	3.0655	3.54656	3.19494	3.51326	3.18403	3.07104	2.99303	3.39943	3.16971	3.15718	3.28787	3.18417	3.04646	3.36339	3.31	3.28093	3.29555	3.29023	3.2872	3.48101	3.47841	3.2275	3.03706	3.22993	3.20261	3.4651	3.11249	3.24068	3.54974	3.12416	3.13997	3.16389	3.34989	3.02638	3.45364	3.38748	3.66695	3.41327	3.24846	3.43791	3.33444	3.49476	3.39627	3.34041
CEACAM4	7.2781	7.74324	7.58821	7.40636	7.72342	7.521	6.99806	7.24309	7.36398	7.38772	7.69082	7.88901	7.18004	7.47437	7.616	7.49758	8.04949	7.34422	6.84525	7.13857	7.64637	7.48444	7.59161	6.97256	7.11353	6.514	7.82011	7.06032	7.4555	7.08442	7.45022	7.05408	7.1725	7.12889	7.17794	7.89655	7.66043	7.87461	7.01491	7.23308	7.25602	7.15711	7.59208	7.23129	7.1048	7.29138	7.17351	6.93134	7.22169
PPARGC1A	7.33593	6.41769	6.64871	6.84348	7.29522	6.16821	6.92667	6.37158	6.96294	5.89408	6.82585	6.42575	6.40757	6.27776	6.19846	5.99534	6.44039	6.67218	6.43961	6.14372	5.786	7.00857	5.53367	5.86564	7.01247	6.23712	6.22444	6.36883	5.91974	6.27681	7.02344	5.92307	6.10723	6.07107	6.5746	6.22675	6.91842	6.40834	5.82349	5.8542	6.41293	6.28247	6.21337	6.15276	6.48544	6.7026	6.28989	6.30653	6.33114
LYVE1	10.5702	9.59405	10.1388	9.68457	10.3827	10.5245	9.41004	9.12858	9.25283	10.315	9.06947	9.84309	9.89311	8.91611	10.3995	9.46074	10.1526	9.64192	8.90688	10.3148	10.3088	8.953	10.2714	9.36572	10.0446	9.05512	9.09061	10.2965	10.0053	9.22161	9.5174	9.71532	9.50783	8.83982	9.61369	9.3125	9.31763	9.58464	9.81157	9.34856	9.08309	9.8388	9.72183	10.4086	9.81636	8.8901	9.46539	8.8948	10.234
UTS2	3.15647	2.87066	2.75641	2.93052	5.11748	2.78409	2.82432	2.88493	2.98527	2.86706	2.90769	2.9372	3.00228	3.01456	4.53947	2.7703	2.92934	2.9148	6.95156	2.87529	2.9653	3.05798	3.96279	2.73587	2.71826	3.52943	2.9089	2.80345	2.75479	4.68683	2.75176	2.94529	4.9014	3.216	2.8696	2.85994	2.866	5.61114	3.01478	2.87396	2.77768	5.15237	2.81278	2.94065	3.02488	3.15315	2.7334	7.63049	3.05189
GADD45G	8.25412	8.2509	7.85612	7.50006	7.84709	7.87173	7.97228	7.81204	7.7182	7.7633	8.05649	7.95156	7.67773	8.27114	7.99426	8.38139	7.53853	8.04398	8.01505	7.82029	7.54675	8.23738	7.21604	7.20708	7.82023	7.7861	7.96416	7.6816	7.12854	7.71013	7.73715	7.19174	7.09796	7.59834	8.43504	7.35113	7.41031	7.62766	7.08155	7.66364	7.6064	7.56082	7.61917	7.83031	7.84683	7.88429	7.5234	7.99168	7.93445
BTNL3	5.74927	6.19733	6.73613	6.9486	5.93745	6.45142	6.54375	6.94323	5.9555	6.22363	6.62807	5.89989	6.12542	6.0645	6.13414	6.1687	6.60565	6.13371	5.52603	6.52929	6.53585	6.08816	6.06164	6.64223	6.50139	6.01558	6.14787	6.55758	5.97936	6.09335	6.68732	6.28553	6.08967	6.84393	6.88816	6.20877	6.1024	6.11749	5.866	6.79752	6.13598	5.85606	5.83068	6.44471	6.02928	6.4138	6.81648	5.56372	6.55659
APOBEC2	6.22501	6.34123	5.85356	6.46525	6.10875	6.137	5.52942	5.94622	5.72005	5.84841	5.74706	5.96565	6.98213	6.53007	5.66074	6.05614	5.97749	6.0528	5.66362	6.06123	5.71121	6.41882	5.6348	5.8002	5.54921	5.57624	5.67106	6.11388	5.81275	7.4505	5.82635	5.81558	5.93117	5.56527	5.91304	5.74647	5.92428	5.60756	5.65148	5.93511	5.54584	5.68502	5.92901	7.34696	5.95346	6.95463	5.86283	5.68437	6.12058
EHD1	8.83659	8.55938	7.48155	8.89294	8.60826	8.21055	8.30524	8.51873	8.53446	7.99147	8.7395	9.02044	8.8857	8.51629	8.22062	8.24714	8.47104	8.43893	8.4349	7.97032	8.44608	8.4672	8.36997	7.92724	8.17464	8.28027	7.52397	8.26299	7.95979	9.43401	8.46391	8.1443	8.46939	8.20572	8.72744	8.477	8.45749	8.25273	8.42945	7.59672	8.33875	8.00369	8.25105	9.11279	8.34699	8.8276	8.41122	8.47266	8.01719
POP1	6.84455	7.04255	6.50282	7.17862	6.71282	6.07384	6.80663	7.03318	6.60911	6.54603	6.30136	7.18302	7.15696	7.03869	6.71271	6.42696	6.49378	6.82389	6.6415	6.41672	6.23163	6.55693	6.34071	6.4208	6.61172	6.53662	6.37618	6.45417	6.30606	6.74136	6.42448	7.06326	7.15389	6.31402	6.23057	6.9072	6.57195	6.28007	7.01588	5.98684	6.27648	6.76942	6.52212	7.77209	6.54135	7.15405	6.38902	6.6833	6.43024
PRSS21	6.13227	6.01946	5.3744	5.91285	6.54498	6.84251	6.81069	6.43808	7.44724	6.58616	6.88441	6.04893	5.81052	7.50668	7.05376	6.78182	5.5634	7.81357	5.93495	6.60104	6.9007	7.16695	7.73388	7.4204	6.6686	8.08294	7.41261	6.19359	6.07521	6.91775	7.29071	5.51628	5.87258	8.77574	8.27734	6.29605	6.60818	7.25154	5.93068	9.25136	5.23643	8.4497	7.08317	5.71765	6.03265	7.33157	5.51951	5.91912	6.59029
MLLT11	10.8125	8.8289	8.2062	9.12194	9.77826	9.1047	8.66126	9.28615	8.50704	8.57802	8.00541	8.44769	8.8539	8.26579	9.40745	9.57829	8.567	8.49565	8.81359	8.16986	8.57425	8.70489	7.6033	7.27482	8.76247	7.9546	7.96791	8.52505	8.26699	8.61808	8.24657	8.76387	8.18635	7.01721	8.44165	7.2727	8.55175	7.98661	8.30105	7.63272	9.65936	10.1509	9.00812	8.59297	8.7575	8.49919	7.54713	8.89733	8.29827
STIP1	8.49805	9.06715	7.88032	8.65183	8.594	8.238	8.26822	8.10501	8.33448	8.24986	8.35492	8.81901	8.83254	8.32332	8.81565	8.00101	8.30291	8.21777	9.15721	8.50027	8.37925	7.65435	8.16881	8.4945	8.25985	8.20378	8.27605	8.46671	8.16793	8.68184	8.79666	9.12215	8.32748	7.96082	8.22196	8.6012	8.2104	8.15213	8.33584	8.31186	8.20157	8.27702	8.32948	8.33721	8.35993	8.56116	8.56958	9.17788	8.52534
IFI44L	7.97132	7.82219	7.89277	7.41884	7.0018	8.14903	7.40178	7.75423	7.90781	6.82755	8.13449	7.0862	7.24908	6.70339	8.18444	6.37493	7.08525	7.89511	7.2235	8.71846	8.57841	7.81088	8.578	7.19506	6.55872	6.16467	8.40217	7.96101	8.2005	8.73791	7.35618	5.75274	6.85763	8.7318	7.23157	8.19722	7.71921	7.44979	8.19047	7.56838	7.80498	7.74798	5.7121	7.31237	7.92961	7.36028	6.50196	7.25413	8.56
LILRB5	6.9629	6.03299	7.4261	5.75903	6.91578	6.91279	6.79778	6.89644	6.61655	6.38833	5.93366	6.19722	5.81452	6.75791	6.52671	6.24203	6.8437	6.44962	7.79288	6.39854	6.48091	6.4784	6.82023	7.0598	6.79022	6.30436	6.36322	6.5154	8.21938	7.113	7.08824	6.47328	7.34165	5.77013	7.07788	7.14489	5.7163	6.37081	6.54751	6.57998	6.97076	6.75112	6.50018	7.88052	7.49528	6.0217	6.45483	7.6797	6.44273
SDS	7.10103	6.02433	6.47751	6.60158	6.55299	6.63552	6.52639	6.37421	6.24563	6.37259	6.07967	6.2875	6.35623	7.17803	6.7759	6.86822	6.46527	6.3286	8.32101	6.11711	6.36116	6.60961	6.21341	6.28821	6.26735	6.40969	6.13031	6.42499	6.53192	7.14932	6.5783	6.46246	6.17074	6.12322	6.62073	6.22879	6.51044	6.29704	6.21747	6.37097	6.69	6.34181	6.43862	9.02021	6.21577	5.91665	6.22326	8.18889	6.46005
SLC27A2	6.19362	6.07359	5.69668	6.03695	6.00399	5.63185	7.09308	5.85034	5.98603	8.05826	6.51104	6.16157	6.04085	7.72893	6.57229	8.55968	6.76627	6.26816	8.8565	7.79049	7.82198	5.79486	6.57934	7.16388	6.55473	7.16036	7.98438	6.10007	7.39241	9.61992	8.26628	6.27093	6.16729	5.63441	6.45729	6.69312	6.5707	5.7475	5.52597	6.39595	7.56629	7.30376	6.82415	8.39442	6.39789	8.01591	9.00804	8.90078	7.89562
KIF2C	5.99069	5.75082	6.04152	5.85413	5.90459	5.97452	5.75455	5.79054	5.82383	5.81618	5.77835	5.96749	5.63994	6.25841	6.76298	6.42107	7.05167	5.88339	5.68961	5.87725	6.42276	5.91668	6.28355	5.80619	5.69071	5.56441	6.22715	5.95212	5.78749	6.39054	5.79825	5.61109	5.94253	5.51248	6.13373	6.10325	6.25946	6.31623	6.42238	6.3333	6.23377	5.97683	5.83817	6.11527	6.17254	5.93754	5.81269	5.59029	5.78577
SPINK5	8.08371	7.61828	8.14955	7.47448	7.17431	8.29815	8.5223	8.55535	8.22951	7.32005	6.96811	7.74788	8.0382	8.47692	8.26301	8.29728	9.01034	8.73905	7.30793	8.85516	8.41046	7.79594	7.87015	7.37207	8.39377	7.45991	10.1121	7.8672	7.76694	8.50906	8.26448	8.63913	7.42523	7.8125	7.57225	8.21205	7.9993	7.46445	7.4066	8.71093	7.73948	8.72286	8.13556	8.10352	8.37168	8.07926	7.90973	7.21447	8.66766
LILRB4	5.16679	5.85497	5.57689	5.60214	5.88031	5.82627	5.67101	5.13725	5.33708	5.14573	5.02243	5.66754	5.19821	6.30838	5.3757	6.0201	6.23612	5.38613	8.13508	5.19833	5.48935	5.52157	5.2727	6.44558	5.36893	5.57345	5.22917	5.60081	6.06034	5.73992	6.06772	5.4175	5.87746	5.02061	5.57902	5.27191	5.56835	5.54758	5.61532	6.02612	6.12043	6.5537	5.81921	6.58943	6.02408	5.03912	5.53808	7.53444	5.30977
IL24	5.32155	5.55475	4.80782	4.99495	4.66225	4.78616	4.70756	4.86811	4.39451	4.52046	4.43143	5.23879	5.22841	5.36037	4.45368	5.01466	5.13942	4.89217	4.92326	4.41636	4.49525	4.86425	4.63162	4.4376	4.73065	4.42959	4.82338	4.61332	4.80188	7.10975	4.63626	4.58236	4.41327	4.75117	5.03063	4.32833	4.64489	4.35248	4.31113	4.45067	4.57101	4.73285	4.48749	5.23074	4.76938	4.7702	4.23061	5.04223	4.45658
KLK11	9.06874	9.19038	8.05255	9.45415	10.1353	8.28821	9.52898	9.49693	9.48765	9.88769	9.74527	9.41356	8.8321	9.0213	8.84614	8.92133	9.72619	9.6475	9.51358	9.88965	10.2526	8.3692	9.31433	9.40471	8.54904	10.0281	10.8087	9.05714	8.57576	9.31673	9.55407	8.65692	7.77394	9.12822	8.96218	9.35011	9.28023	9.3128	8.43607	9.1063	10.3622	8.3734	9.44718	9.34094	7.3478	10.0127	10.7094	9.49011	9.84162
KDELR3	7.47697	8.25851	7.36271	6.9119	7.64187	7.59871	8.03905	7.51687	7.15817	7.31312	7.54038	7.34085	7.90723	7.44799	8.09765	7.04823	8.16504	7.25273	8.01039	8.03978	7.67877	6.86062	7.45877	7.47503	7.71882	7.17229	8.32944	7.19651	8.10997	7.51968	7.71551	8.18722	8.18269	6.89414	7.13763	8.26861	7.55896	7.17006	8.07903	7.1237	7.97756	8.38057	7.75051	7.54943	7.94354	6.74581	7.96628	7.85073	7.88423
LIAS	7.37809	7.77931	8.01243	7.64345	7.47556	7.4942	7.8171	7.71011	8.50431	8.20315	7.81561	7.48037	7.99371	7.245	7.68388	8.6138	8.16885	7.77699	8.70823	7.84655	8.29578	8.081	8.05806	8.53737	8.14222	8.21156	8.65227	8.26942	8.19477	7.08859	8.14995	7.83685	8.11689	8.39532	7.73188	7.8297	8.27358	8.63995	8.40691	8.90228	8.1288	7.7979	8.44191	7.44958	7.91488	7.89175	8.37438	8.73752	7.80972
LILRA1	6.50888	6.84563	5.61608	6.4359	6.64524	6.12832	5.84402	6.05123	6.74739	6.58301	6.8844	6.28108	6.02113	6.61031	5.91562	6.23974	6.60291	7.32277	5.81894	5.92431	6.60165	6.17499	6.52415	5.70488	6.11293	5.66995	6.16764	6.02922	6.0361	6.05687	6.438	5.81666	6.01604	6.24613	6.61971	6.76893	6.68774	6.04058	6.23083	5.88822	5.72441	6.47933	6.39192	6.58812	6.30516	5.95788	6.39411	5.73241	6.03071
LILRA2	7.01846	8.2212	6.22242	7.6324	7.48089	7.60378	6.85663	7.37351	7.69098	7.41113	7.73099	7.42507	6.37654	7.6739	7.07583	7.36485	8.19932	7.82192	7.41466	7.11102	7.66539	7.3175	7.62455	6.7346	7.13969	6.21417	6.81583	7.05734	7.48565	7.40065	7.77531	7.1435	7.04672	7.22912	8.33214	7.87825	8.06288	7.54783	7.34087	7.75556	6.91912	7.50398	7.318	8.009	7.50551	7.09757	7.75706	7.38746	7.12934
PIM2	7.69203	7.81754	8.64159	8.21231	8.22577	8.43448	8.10567	8.1353	7.98024	8.14445	8.01703	7.86215	7.7196	8.53883	7.46132	8.02223	7.63412	8.06004	8.70072	8.42814	8.15404	8.33629	7.85252	7.71041	7.99616	7.83716	8.53632	8.26269	7.80957	8.36874	7.95791	7.77585	7.79915	7.88967	8.91584	7.6254	7.73448	8.00689	7.98693	8.38048	7.802	8.35835	8.30347	8.17881	8.37655	7.6725	7.80673	8.69081	8.39958
CNMD	4.85935	5.04201	4.70328	4.54676	4.86403	4.90494	4.92745	4.79448	4.58969	5.07981	4.52737	5.01808	4.74983	4.80599	4.80826	4.82629	5.4333	4.60855	4.97136	4.98203	4.67022	4.77363	4.84825	5.3481	4.83241	5.02701	4.40716	4.95003	4.81798	4.84877	4.9728	4.93782	4.74033	4.61999	5.33826	4.91532	4.64457	4.74696	4.57372	4.90487	5.12297	4.85033	4.7225	4.74541	4.60502	4.85535	5.26343	4.91662	5.01982
UBE2C	7.90101	6.98393	7.64603	7.534	7.53617	7.48686	6.87681	7.30149	7.69978	7.12145	7.0578	7.34542	7.18045	7.50934	8.87954	8.24366	9.76183	7.27746	7.26499	7.30965	8.47463	6.94615	8.48814	7.23159	7.17407	6.63931	8.47251	6.9836	7.36836	7.54637	7.57121	7.3814	7.01554	6.70351	7.40695	8.21075	8.17698	8.22816	8.33031	8.21178	9.01176	7.37837	7.00099	7.37666	8.43722	6.98159	6.91017	7.29356	7.21198
DEPP1	10.1221	10.147	9.38798	10.3366	10.1578	9.52173	9.57456	8.99976	9.32108	9.75917	10.3194	11.0769	10.8536	10.9357	10.3333	10.0177	9.56697	10.6125	9.40908	9.88571	8.97631	10.6386	9.13207	9.99837	10.1839	10.0806	10.5681	9.79524	10.9813	10.1168	10.6077	8.89897	9.23186	9.64415	10.4584	11.3028	9.87259	9.55683	9.48467	9.96569	9.50465	9.70931	8.94631	10.6994	10.1975	10.6942	10.3009	9.38943	9.85809
RAPGEF4	7.33769	7.16077	7.46906	8.0197	7.24659	7.31161	7.01076	7.36613	7.27195	7.31928	7.25679	7.8536	6.77984	6.79154	5.71085	7.13822	7.41284	7.23688	5.93025	6.73676	7.20834	7.62146	7.45184	6.13084	7.21818	7.84816	5.70179	6.26222	7.18442	7.60661	6.81682	7.28024	6.47186	7.59757	7.93463	7.98016	7.22607	6.94112	6.65228	6.12713	6.61556	7.47942	6.85743	8.31317	6.12769	8.0734	7.19539	5.94672	6.76737
DUSP14	9.82303	8.29618	8.05655	9.64948	9.09119	8.2881	8.71378	8.75465	8.50422	8.55299	8.77917	9.26944	8.99269	9.67212	8.59499	7.97783	8.97029	8.53026	9.64555	8.61069	9.04139	8.24251	8.46382	8.07487	8.15813	8.79608	8.43619	8.72571	8.8424	9.77206	9.01081	8.96264	8.63565	8.34008	7.94342	8.64512	8.48584	8.79648	8.36454	7.85111	9.052	8.45442	8.49023	9.71449	8.88901	10.1327	8.53643	9.64939	8.63792
DNAJB4	9.21435	8.36591	8.79905	9.64785	9.34276	8.72617	8.96141	8.6721	9.34584	9.10835	9.0953	8.88378	8.9666	9.02598	8.77709	8.41158	9.06144	8.80024	8.76351	8.84412	8.94662	8.37971	8.92269	8.75837	8.6041	9.29785	8.20388	9.01892	9.10417	8.53687	9.3478	8.83166	8.78925	9.49983	8.81377	8.92001	8.65555	9.36859	8.96771	7.85805	8.95417	8.78473	9.10133	8.51955	8.70449	9.01057	9.47473	8.81697	8.85319
KERA	2.72005	2.82188	2.81604	3.19021	2.67997	2.87893	2.56367	2.8057	2.92707	2.84058	2.70872	2.72005	2.77911	3.05103	3.06009	2.6685	3.09953	2.77803	2.77069	2.91865	2.80603	2.803	2.82393	2.84425	2.74248	2.52469	2.5776	2.73346	2.93559	2.84397	2.77766	2.68691	2.53287	2.7958	2.57749	2.88934	2.83852	2.80029	2.90867	2.77052	2.61466	2.8542	2.63755	2.70512	2.78646	2.82772	2.90865	2.75719	2.93948
ESM1	7.88084	7.91814	6.31786	7.6193	6.84943	7.21339	6.662	7.24293	6.64306	7.85602	6.3308	6.75126	7.25014	5.75865	8.35226	7.19655	6.12784	7.64617	3.79475	7.87615	6.554	6.63968	6.38264	5.78305	7.55813	7.7479	5.52765	7.70619	6.44313	7.6252	7.23185	8.46339	8.10066	9.08942	5.88725	6.85208	7.68867	6.40513	5.09355	6.50266	6.83743	5.10349	6.78578	8.13524	6.21156	6.49577	6.88849	5.12871	7.85058
AKR1C4	2.99324	3.17953	2.92311	3.3808	3.17065	2.94041	3.09925	3.01051	2.90364	3.20079	2.76817	3.20743	3.11676	3.23002	3.02569	3.29906	2.99331	3.00712	2.87981	3.13723	3.06484	2.78081	2.66889	3.03033	2.96617	3.07448	3.11719	3.1955	3.08737	3.2465	3.04589	3.2044	3.01726	3.13321	3.02951	3.12915	3.20832	3.01467	2.86155	2.91348	3.07458	3.25745	2.58296	3.07715	3.04942	3.16145	3.1004	3.04784	3.14383
ADAMTS8	10.6132	9.34519	7.13282	8.84858	9.12061	8.5142	8.78113	10.0519	9.38399	8.18021	8.73129	9.40378	9.58131	9.93359	8.80493	9.15478	8.94466	9.48253	8.16727	9.07872	8.94188	8.70162	8.26695	7.75854	8.60054	7.8315	8.66206	8.74562	8.48469	9.51768	9.29375	8.76762	9.06848	8.25075	8.9746	8.65897	9.58521	8.11153	8.85906	8.20356	9.01699	9.29204	9.3658	8.93712	8.99311	9.10908	8.84679	8.3171	9.10441
ADAMTS5	6.24285	6.3395	6.5129	5.94663	6.47543	6.46242	6.9377	6.25876	7.21819	6.27683	6.06103	6.02889	7.56742	5.94092	6.43825	6.54247	5.87567	6.39551	5.58869	7.76405	6.35872	6.1966	7.00364	6.60741	7.3162	6.49636	6.19736	6.88682	6.31475	6.24515	6.28808	6.95335	7.26084	6.62927	6.2962	7.09367	5.9901	5.73242	6.54726	5.57753	6.55939	6.26256	6.63171	6.44098	6.20302	6.45369	6.45534	5.68317	7.61038
CHEK1	5.07983	4.91043	4.8946	4.79365	5.02523	5.05646	4.72761	4.77406	5.1364	4.76541	4.96777	4.94301	5.21619	4.95267	6.01922	5.07334	5.8744	4.92333	5.07983	4.81486	4.98835	4.53175	5.24355	4.93938	4.54314	4.62529	5.45796	4.77887	4.83499	4.9482	4.97144	5.23838	5.16448	4.67299	4.69694	4.9185	5.2196	5.04829	5.24833	5.23473	5.17445	5.03223	4.74788	4.81174	5.5883	4.66757	4.91768	5.18489	4.8276
BTN3A2	8.97378	8.80917	8.23124	8.41434	8.90696	8.87828	9.38065	8.74657	9.51103	9.15205	9.18262	8.87493	8.86743	7.88246	8.94579	8.60736	8.98842	9.169	10.1998	9.33569	9.53835	9.08207	8.43555	10.1897	9.19874	9.85236	9.36356	9.23504	9.50041	8.80336	8.50145	8.53254	9.52731	9.14526	9.22411	10.0041	9.42969	9.26253	9.38585	9.03083	8.69934	9.35603	8.67625	8.34354	8.82791	8.66365	9.10591	10.3156	9.34244
PTPRT	5.11555	5.77569	5.48722	5.45175	5.32308	5.30551	6.14292	5.35363	5.42339	6.4434	4.98196	5.43342	5.14701	5.69349	5.80945	5.56334	5.43725	5.08538	6.77456	6.46479	6.20192	4.93361	5.6403	5.67889	5.487	6.06158	7.04151	5.45983	5.72767	5.49389	6.33591	5.74861	5.14073	5.22378	5.32791	5.32011	5.64885	5.43457	5.02227	5.00235	6.27964	5.95477	6.24894	5.508	5.39581	5.9839	6.93025	6.80454	6.45449
CD160	5.30287	5.89337	5.27066	5.3735	5.6047	4.94649	5.10396	5.83757	5.45163	5.52033	5.88564	4.9328	5.10367	6.2397	5.49196	5.17059	5.06463	6.24842	5.39803	4.6478	5.9058	5.21596	5.74133	4.98774	4.77839	5.56007	4.8241	5.13593	5.78786	6.00486	5.70318	4.7634	5.39073	4.89134	5.24978	5.25765	6.73355	5.51593	5.69126	5.65067	4.82251	5.59635	4.65889	5.21179	4.94214	5.11282	4.86433	5.3893	4.63003
CHGA	5.47083	5.43752	4.70245	4.78458	5.40135	5.01356	5.02708	5.11057	4.6954	5.80481	5.07555	4.68531	5.54616	5.66991	5.51021	5.74587	5.40162	4.60987	5.15969	5.56897	4.82708	4.56694	4.61846	5.30458	5.41876	4.92671	5.43431	4.9072	4.87591	4.67997	5.54622	4.80007	4.88216	4.85246	5.84307	4.75435	5.34043	5.19832	4.98399	4.91235	5.17898	4.92951	5.49144	4.88795	5.34454	4.83417	5.50518	5.19235	5.5373
ZWINT	8.31112	6.92961	7.59136	7.58559	7.96762	7.6863	7.61312	8.06508	7.54782	7.24246	7.44905	7.83183	7.71553	7.32693	9.4097	7.63988	9.65022	7.46128	7.64597	7.04486	8.29247	6.64002	8.43533	7.13888	7.1249	6.34294	8.88711	6.90033	7.38673	7.39326	7.9314	7.708	7.68316	6.36819	7.14226	7.73426	8.21367	7.8274	8.10039	7.54496	8.74365	8.24809	7.05133	7.40743	8.60848	7.10746	7.18866	7.63393	7.02876
CHGB	6.06856	6.58628	4.48569	4.72679	5.9109	4.96067	5.15331	4.52267	4.78995	7.34007	4.94768	4.88729	5.7008	5.95873	4.84236	6.25297	5.25288	4.64984	5.58519	5.50121	4.85983	4.39859	4.96623	8.7389	5.03229	4.87848	5.52667	5.12846	4.69361	5.24674	5.93193	5.11265	4.83561	4.97057	8.32457	4.92533	5.25926	5.24873	4.91907	4.81893	5.34525	5.3087	6.21265	4.59013	6.10733	4.95618	6.11649	5.70031	5.50847
HHLA2	3.70568	4.00997	3.47191	3.52384	3.60011	3.56373	4.21894	3.70846	3.36869	4.62111	3.92948	3.77864	3.56718	3.56645	3.91855	3.9192	3.8857	3.7542	4.70862	4.196	4.39911	3.68687	3.87605	4.73135	3.6364	4.56297	4.61331	3.84111	4.2337	3.95174	4.62615	4.31187	3.57528	3.711	3.51939	3.87669	3.97822	3.77239	3.41493	4.09643	4.60652	4.12953	3.82701	3.74504	3.73376	4.04906	5.19468	4.63914	4.30057
CORO1A	10.155	11.0336	9.50372	10.5463	10.6478	10.0286	9.61396	9.54825	10.2608	10.4079	10.6156	10.6101	9.29918	10.5675	9.69858	10.2311	10.7824	10.8209	10.3945	10.137	10.7853	9.79015	10.2839	9.53627	9.77643	8.71287	10.2279	9.89588	10.2673	10.2879	10.5723	9.80282	9.99612	9.48885	10.8027	10.5917	10.7652	10.205	10.1371	10.0257	9.96751	9.96687	10.2515	9.92932	10.0566	9.63658	10.4049	10.3381	10.1348
PTP4A3	8.29785	8.1068	8.02867	7.88366	7.95053	7.77655	7.73781	7.95976	7.36951	7.59114	7.95369	8.21156	7.79763	8.23695	8.02753	7.83728	7.7875	7.84127	7.40547	7.70152	7.66319	7.84849	7.76005	7.04108	7.66436	7.67593	7.02962	8.45093	7.3127	8.86707	7.54856	7.55167	7.34311	7.21587	8.40952	7.98439	7.4961	7.23763	7.49759	7.75291	7.64611	8.02643	8.28489	8.77825	7.47919	7.57441	7.70057	7.53496	7.77071
CHI3L1	7.32398	9.08316	9.07698	8.48728	8.59541	8.26787	8.75018	8.87966	8.00008	6.92629	9.22351	10.121	7.71144	9.30475	8.99425	7.77758	8.99066	8.40618	11.2634	9.62142	8.10569	7.64042	7.12038	9.81567	9.07942	7.96264	10.0745	10.4524	8.1849	9.09683	8.11106	8.62723	7.50347	7.28051	9.76317	8.47924	8.42088	6.71022	7.84233	9.24866	7.2816	8.63103	9.95056	9.99397	8.26307	9.22462	7.41938	10.9814	9.55165
NUDT6	7.04221	7.08381	7.64094	7.30062	6.85211	7.47888	7.66644	8.06111	7.61843	7.56517	7.56412	7.12818	7.12598	6.89597	7.65404	7.57281	7.3456	7.44057	7.1895	7.25932	7.59262	7.35572	7.75844	7.52007	7.70747	7.45775	7.69845	7.27115	7.32866	6.83583	7.53147	7.36569	7.76876	7.69639	6.92241	6.91867	7.54194	7.73563	7.94815	7.99811	7.67579	7.62048	7.65644	7.1487	7.66514	7.10447	7.36996	7.22217	7.29204
WDHD1	3.8245	3.84183	4.14221	4.07775	3.99445	4.14604	4.32454	4.38554	4.25398	4.01412	4.01156	4.19486	4.19887	3.72346	4.39444	4.00792	4.05678	4.25621	3.93507	3.76806	4.1139	3.88231	4.17435	4.00284	4.20524	4.12362	4.15051	3.82245	3.85143	3.83613	3.95299	4.0687	4.3326	4.18673	3.70847	4.09561	4.31063	4.03859	4.44175	3.71788	4.15667	4.37907	3.92969	3.71543	4.10409	4.02743	3.94153	3.97951	3.79715
CHI3L2	7.81988	10.7116	10.1575	9.5158	9.3293	9.87298	11.6812	10.3586	11.6646	7.75364	11.283	9.9316	11.0137	11.5647	9.37712	10.4729	10.0336	8.92635	7.66894	9.46243	11.2727	9.87269	8.25279	9.35131	10.0887	8.24681	11.5696	10.2471	9.04082	10.6051	10.8099	11.7154	8.4342	9.76266	11.4762	10.2536	10.5699	8.84667	10.8255	10.3708	10.6166	11.996	12.2338	11.056	10.0703	11.8067	7.98691	7.89737	9.6297
FAM107A	11.1787	10.5926	10.902	11.7377	11.5377	10.9952	11.498	12.0257	10.7664	11.3122	11.0097	12.2373	10.3561	11.4503	11.1111	11.0016	11.5664	11.1178	11.0864	10.7667	11.1152	11.6129	11.6504	10.5384	11.4488	12.486	9.96707	10.2502	11.355	11.3816	11.3251	9.33092	9.96388	11.5864	11.0324	10.8485	10.799	11.3022	10.1388	10.6088	10.8911	11.9502	11.2533	11.9072	10.1421	12.1463	11.3512	11.0973	10.8054
ADAMTS6	4.92483	4.34368	4.79413	4.52795	4.73616	4.81519	4.76804	4.76305	4.39343	4.5534	4.66682	4.33128	4.36517	4.17703	4.16127	4.75255	5.09185	4.59048	4.72928	4.66005	4.79052	5.1133	4.8244	4.23766	4.7177	4.73514	4.35151	4.26916	4.96727	4.53408	4.31724	4.45887	4.25722	4.23562	4.84667	4.74024	4.54865	4.7724	4.54536	4.26478	4.66098	4.71031	4.6036	4.5182	4.4221	4.67018	4.62395	4.58713	4.62812
BAZ1A	9.23631	9.7779	9.52148	10.3516	10.0575	9.84742	9.10094	9.10927	8.99709	9.13742	9.741	9.8512	9.12816	9.98925	9.12672	9.16262	9.90423	9.55501	9.6462	9.10125	9.38527	9.64281	9.48597	9.55929	9.36971	8.93313	8.97191	9.17823	9.27666	10.41	9.64902	9.69325	9.27121	9.76703	10.141	10.121	9.38544	9.30249	9.19538	9.61128	9.1112	9.42861	9.48654	10.3016	9.42968	9.84483	9.35353	9.6694	9.03723
CHIT1	4.84735	5.06283	5.32775	5.69255	6.28969	5.82897	5.56993	7.39553	4.6209	4.84192	4.61305	5.01652	4.8478	5.44001	4.44803	4.926	5.13227	5.19479	7.64785	4.97935	6.91738	5.78518	5.39622	7.67547	4.72337	7.41234	4.99332	5.48746	5.12706	5.88557	6.37433	4.55755	6.78977	4.6037	5.53182	5.21888	4.38678	4.61459	5.21845	7.88973	4.513	6.20421	4.61047	10.7042	4.80474	5.20726	4.89237	7.35498	5.20451
ANXA10	3.58213	3.70552	3.93891	3.85881	3.41885	3.67999	3.72267	3.43843	3.59701	3.50939	3.44838	3.74268	3.65901	3.92302	4.48863	3.6952	3.67342	3.67999	3.80824	3.49719	3.33005	3.83787	3.46383	3.72442	3.80774	3.5994	3.5121	3.48989	4.064	4.27719	3.61257	3.39793	3.78146	3.68015	3.51098	3.57717	3.52275	3.77937	3.74827	3.91302	3.45293	3.93201	3.58689	3.93673	3.44037	3.79639	4.06284	4.00837	3.68933
FZD10	8.1881	6.28667	6.73495	5.78911	6.01151	6.86935	6.953	7.03511	7.48197	6.82513	6.26932	5.8841	6.4393	5.29846	7.17819	7.10749	6.26302	6.63749	7.08657	6.32598	7.08941	6.19683	6.81372	5.72819	6.34626	6.41119	7.61784	6.9521	6.72534	7.04474	5.48854	5.48976	6.2466	5.35727	6.08357	7.05945	6.38179	6.23403	6.14864	6.03589	7.25116	6.40587	6.83886	6.15275	6.31015	6.13678	6.31832	7.1363	6.41808
IRAK3	7.29371	8.3117	7.81096	8.54173	8.21278	8.02821	7.87829	7.79791	7.88397	7.49885	7.81309	8.44914	7.56864	8.19937	7.6666	7.96832	7.54236	7.64895	7.43637	7.67108	7.63529	8.28118	7.9828	7.95001	8.26096	7.67509	7.99518	7.6106	7.86799	7.37888	8.16329	7.65001	7.76851	8.14212	8.37017	8.25161	8.00299	7.78346	7.44753	8.21892	7.82721	8.10213	8.01931	8.71426	7.88398	7.7544	7.7154	7.63344	7.58666
MST1L	5.38859	5.89296	7.5063	6.50273	5.37084	6.78676	5.99306	5.73125	6.66763	6.49349	6.027	5.23793	5.55787	5.19491	5.22965	5.99486	6.00706	5.98963	5.63006	5.48166	6.49772	7.15848	5.95287	6.03559	6.04812	6.24646	5.50213	5.8687	6.4998	5.50381	6.27456	5.60451	5.53015	7.35042	7.43431	5.82175	6.06118	6.35974	6.33617	7.12064	5.89367	5.4091	5.65825	5.87709	5.8187	5.39963	5.6453	5.60767	5.51569
EGLN3	6.77033	6.11433	6.5741	6.52389	6.71445	6.09651	5.87801	6.22176	6.59993	6.1221	6.68807	6.537	6.7804	7.21785	5.95999	5.86986	6.31412	5.93721	6.30925	6.51031	6.19664	6.47563	6.05837	6.31511	6.45653	5.83834	6.80032	6.37266	6.54437	7.146	6.27041	6.11725	6.74302	6.41519	5.98775	6.24506	6.01088	6.17115	6.68818	5.8471	6.41492	7.01504	6.63483	6.7162	6.62721	7.33323	7.13771	6.40095	6.54202
CAVIN3	9.34777	9.12957	8.65431	8.36372	8.87179	8.82038	9.08271	9.32779	9.24196	8.60378	9.02074	9.01682	9.49268	7.98976	9.4302	8.93154	9.65481	8.82153	8.23857	9.24944	9.12478	8.17793	9.45613	8.00746	8.99358	8.66636	8.56209	9.02327	8.93205	8.59212	8.97108	9.42925	9.63362	8.30132	8.19651	8.42026	8.87873	8.76778	9.57964	8.02257	9.62556	9.26463	8.62819	8.53311	9.58795	8.59043	9.10491	8.17747	9.23313
SLC6A14	10.8714	11.7906	10.9285	12.2488	10.7711	11.5885	10.9691	10.8058	11.3638	10.4737	10.9784	12.2744	11.2203	12.3187	9.82357	11.9483	12.1026	11.5457	11.1947	11.4009	10.9052	11.7703	10.7493	10.7932	11.3961	10.2686	9.5544	10.1426	10.9993	12.9739	11.0013	11.1174	10.5841	10.3909	12.2996	11.083	11.7537	10.7945	10.6493	9.64683	10.7255	10.7581	11.2559	12.837	9.99555	12.782	10.5796	11.2343	11.3868
MRAP2	6.35668	6.1687	6.47653	6.2473	6.22418	5.0935	6.7104	6.02314	6.53824	6.59581	6.71662	6.156	6.73761	6.06745	6.71919	7.48382	6.98573	6.11979	5.85691	6.73802	6.39194	7.48692	6.50804	5.90582	6.66767	6.3821	7.77427	5.95286	6.21671	5.54098	6.20538	6.23789	6.22956	6.70237	6.59895	6.05722	7.00456	7.40586	6.22318	5.97293	6.80688	6.23618	5.89583	6.17061	6.11506	7.14392	6.64022	5.87214	6.75179
SP140	5.13577	5.21165	5.23955	5.2377	5.08734	5.53652	4.87796	4.89979	4.86282	5.4953	4.79412	4.96307	4.59688	4.80004	4.88408	5.52415	4.73741	5.1089	6.32575	5.57134	6.01182	5.31674	5.19943	6.17435	5.36655	5.1874	5.74063	5.37489	5.26376	5.36359	5.33381	4.67369	5.39205	5.49157	5.52746	5.55977	5.09851	5.23477	4.87565	5.7955	4.87387	4.92077	4.82792	4.98563	5.31951	4.95429	4.89202	6.36021	5.593
PXMP4	7.4249	7.47746	8.77743	7.54076	7.13694	8.11312	8.08985	8.02766	8.1614	8.29759	7.85454	7.63142	7.79892	7.39536	7.78145	8.09553	8.19668	7.85378	8.45807	8.09614	8.00517	8.32425	8.21618	8.31211	8.29864	8.15413	8.20813	8.05235	8.35039	7.67912	8.11919	7.54312	7.72087	8.18277	8.47434	7.8941	8.5118	8.55786	7.50831	8.6058	7.68064	7.90382	8.0943	6.96453	7.52545	7.80184	7.95506	8.49018	8.05265
CHRM1	5.57027	4.23097	4.16421	4.13971	4.14522	5.06829	4.76522	5.2218	3.96523	5.23331	4.81117	4.65598	4.26159	4.03576	4.14855	4.93047	5.2356	4.60241	3.97663	4.36398	5.32609	4.79356	5.73104	3.83405	4.52528	5.37691	4.03927	3.9965	4.13289	4.16289	4.43201	3.9412	3.93144	4.21633	4.54065	5.44169	4.62633	4.82645	4.03814	4.29201	3.96421	4.9774	4.38776	3.92076	4.26753	4.11067	4.22163	3.89442	4.40089
HOGA1	7.00343	6.24132	6.66328	7.24972	6.6479	6.82814	7.01773	7.44485	7.35342	6.92532	7.21982	6.54179	6.98453	6.95984	5.97992	7.16239	6.78649	6.93403	5.70325	6.62446	6.96646	6.92901	7.15535	6.21086	6.94015	7.21628	6.94058	6.62603	7.2497	6.08099	6.78806	5.75152	6.28138	7.57252	6.84312	7.11934	7.01048	7.613	6.85105	7.16661	6.72759	6.70457	6.36489	7.11723	6.30553	7.88277	7.9018	5.85461	6.65813
CHRM2	4.15702	3.62751	4.10464	4.15309	4.27769	4.02132	4.21332	4.18279	4.0923	3.89072	4.10495	3.89307	4.40609	3.99979	4.38724	4.14619	3.76585	4.19835	3.46798	4.06355	3.76522	4.254	4.17744	3.76319	4.1965	4.0288	3.6133	3.95618	4.26566	3.77806	3.67272	3.70423	3.89508	4.066	4.24244	4.23339	3.63418	4.05356	3.97655	4.27571	3.53265	3.83319	3.93467	3.24401	4.01373	4.31367	4.17914	3.51469	4.14719
CHRM3	5.6338	6.06376	5.38858	5.44853	5.80701	5.52336	6.02787	5.63517	6.28707	5.77459	5.80516	5.51593	6.21566	6.05366	6.6833	5.93197	5.51001	5.96053	5.08458	5.97803	5.68717	5.47583	5.78499	5.4338	6.17371	5.47207	4.99981	6.04871	5.3615	6.04035	5.45151	5.91476	5.99973	6.56817	5.79887	5.48548	5.96412	5.26382	6.10446	5.43125	5.18923	5.59959	5.3413	5.3143	6.15249	5.97164	5.94399	4.93262	6.03211
MTFR2	4.51679	4.54134	5.09208	4.78568	5.12882	4.84934	4.44769	4.89482	5.03528	4.44257	5.1761	4.706	4.65248	4.76313	5.6095	5.17899	5.45833	4.74559	4.29216	4.38315	5.14741	4.81954	4.99261	4.65306	4.60251	4.17876	4.79221	4.26931	4.6169	5.50111	5.03989	4.41495	4.88	4.76313	4.69753	4.716	5.23357	5.25486	4.9637	4.9026	4.89845	5.08074	4.73687	4.71177	5.29336	4.43927	4.38395	4.50984	4.45162
CDCA5	7.2241	6.6369	6.93735	6.88333	7.02091	7.1619	6.68545	6.93032	7.20227	6.86028	6.79597	7.01876	6.94599	6.96127	8.00373	7.33151	8.38053	6.79092	6.60518	6.55366	7.65141	6.47826	7.55722	6.6711	6.55326	6.37136	7.5259	6.40842	6.52924	7.01525	6.96777	6.80827	6.80653	6.41999	6.76925	7.06031	7.46873	7.44467	7.54554	7.22753	7.39372	7.02979	6.33166	6.74596	7.66262	6.53977	6.42345	6.62706	6.56342
AHNAK2	6.82338	6.53936	6.77	6.12047	7.55482	6.984	7.43472	7.25095	7.28834	6.81401	6.56445	6.52098	7.28468	7.32414	6.3592	7.0015	6.56457	6.74217	7.0156	7.13743	7.39727	6.76191	6.79938	6.69971	7.22604	7.37479	7.22516	6.98524	6.77754	6.91735	6.96792	6.81188	7.11315	6.49186	7.35032	6.43741	6.10021	6.83711	6.9008	6.28721	7.4718	7.11157	6.8377	6.7457	7.23775	6.91407	8.34501	7.03172	7.08234
GLCCI1	7.0718	6.47445	7.84629	7.37724	7.10791	7.61783	7.66384	7.50565	7.83517	7.66158	7.84946	6.64258	7.42498	6.88509	7.4657	7.50674	7.78286	7.46745	7.84224	7.55267	7.74555	7.42912	7.618	8.58397	7.53358	7.65996	7.583	7.04237	7.83596	6.92523	7.1224	6.98365	7.43666	7.87667	7.39683	7.23204	7.54087	7.80255	7.35228	7.84332	7.22659	6.94582	7.6448	5.60957	7.02856	7.27602	7.3377	7.7703	7.47297
OIP5	5.94503	5.39083	5.82134	5.68532	5.74543	5.88758	5.61831	5.90286	5.85224	5.55196	5.68034	5.80697	5.63432	5.74007	7.0263	6.04601	7.51173	5.48609	5.96716	5.6684	6.60603	5.62257	6.45069	5.87586	5.56921	5.57509	6.9473	5.70098	5.84566	5.51977	6.03465	5.52721	6.04849	5.38815	5.62829	6.39013	6.63507	6.39603	6.50114	6.08318	6.58943	6.38192	5.09768	5.55991	6.18946	5.40054	5.48925	5.99716	5.62091
CHRNA1	4.17756	4.10125	4.32753	4.45278	4.48577	4.63047	4.18392	4.47597	3.98902	4.10451	4.29181	4.11081	4.34967	4.18484	4.32612	4.42427	4.3944	4.3472	5.56455	4.18546	4.23898	4.34864	4.34406	4.5099	4.37479	5.28733	4.47879	4.34861	4.25422	4.36167	4.35894	4.15507	4.36304	4.08724	4.39423	4.0734	4.32112	4.13616	4.08607	4.52017	4.38997	4.14499	4.34757	6.87074	4.23598	4.17103	4.29151	5.10723	4.43328
SCRG1	4.6457	4.48765	5.95614	4.953	5.59502	5.80201	5.28371	6.12978	5.00599	4.67324	4.57585	5.10519	4.95012	4.73844	5.51425	4.79196	5.49942	4.16417	5.14115	5.15985	4.99403	4.18005	4.85659	5.48935	4.22246	4.15063	6.38798	4.88302	4.85172	4.46303	4.59617	5.99869	6.25466	4.0325	4.72735	4.42663	4.51554	5.61634	6.58337	4.51447	6.02982	5.929	4.51874	5.18362	7.67325	4.73082	4.98732	5.03594	5.20649
SDSL	7.6265	8.09	7.5168	7.04718	7.44022	7.97109	8.00823	8.13649	7.65985	7.15517	6.91698	7.6482	7.24212	7.55907	7.78487	7.87685	7.86863	8.18762	8.98825	7.64177	7.67459	6.84264	7.63399	7.60112	7.48663	7.69378	7.65884	7.41452	7.67556	7.26205	8.22371	7.46946	7.96021	7.58523	7.28946	7.87312	7.64417	7.46772	7.55112	8.43449	7.89249	7.71439	7.93899	7.74877	7.98947	7.08207	7.43213	8.99085	7.65446
CHRNA5	4.24332	4.09101	4.35777	4.74322	4.5383	4.0966	4.0228	3.66994	4.31492	3.87674	3.98119	3.76454	4.42899	3.99735	4.32649	4.28181	4.25103	4.23429	3.98673	4.06518	4.06853	4.11765	4.50547	4.34073	4.20795	3.87989	4.59867	3.99796	4.24853	3.76579	3.81755	4.68246	3.93015	3.68812	4.47563	4.03001	4.2185	3.81781	4.41646	4.47955	4.29597	4.153	3.9274	4.2239	4.12832	4.00076	4.24154	4.09585	4.02766
ZNF257	2.92792	2.81444	3.18854	2.65886	3.1392	2.99736	3.09834	2.88863	2.55632	2.75623	2.79186	2.36794	3.01265	2.9785	2.96599	2.74294	2.99538	2.4585	2.52425	2.61775	3.11663	2.95319	2.89957	2.67959	2.63997	2.84729	2.91931	2.89929	2.81903	2.56148	2.74836	3.19849	2.75623	2.99126	3.12511	2.65968	2.69764	2.85905	2.58488	2.542	2.76675	2.61225	2.7871	2.78177	2.65104	2.57828	3.22142	2.63111	2.63862
ADCY8	4.94972	5.08743	4.13519	5.10941	4.74452	4.4564	4.87328	4.3783	5.672	4.87414	5.07839	4.96126	5.12519	5.18315	4.4085	5.56393	5.02811	4.9726	4.70169	5.0842	5.34306	5.03323	4.91374	4.63671	4.84887	5.93294	4.83642	5.07515	5.191	5.65106	5.01758	4.90421	5.14539	5.53291	5.58436	4.97242	5.44674	5.4182	4.8544	4.80102	5.33782	4.50715	4.67135	4.56454	4.95335	5.0968	5.31126	4.70516	5.07305
ZIM3	2.90974	2.7876	2.61471	2.763	2.85831	3.03491	2.71348	2.755	2.85041	2.86467	2.86291	2.74305	2.7108	2.90978	2.60857	2.60395	2.81611	2.94908	2.79039	2.66975	2.80375	2.93858	2.73697	2.78403	2.52057	2.93223	2.67593	2.78983	2.77364	2.68532	2.71592	2.69648	2.72764	2.68733	2.87872	2.84534	2.66517	2.84068	2.88056	2.49968	2.83801	2.85976	2.62694	2.87937	2.60314	2.93575	2.78567	2.79562	2.68003
LINC00310	4.94274	5.23397	4.68426	4.71977	5.08145	4.84988	4.90197	5.06944	5.49145	5.00998	4.99876	4.81317	5.32474	4.69098	5.00683	5.08478	5.17118	4.94206	4.49054	5.14844	5.2761	4.75102	4.93295	5.02448	4.74566	5.64103	5.04735	4.71566	5.17727	4.78919	5.17947	5.48199	4.75821	4.83106	5.07687	4.94352	5.249	4.85506	5.17011	5.00829	4.70594	5.05207	4.81802	4.67341	4.85868	4.78395	4.99661	4.46093	5.18276
MCM3AP-AS1	3.97013	3.8663	4.00426	3.88009	3.88541	3.75183	3.95288	3.97017	3.68877	3.8883	3.67991	3.66986	4.00379	3.72284	3.9547	3.90501	3.96954	4.02628	3.84099	3.91221	3.83976	3.88118	3.83638	3.83192	4.23586	3.83278	4.01651	4.34555	3.88345	3.50327	3.99426	4.07849	3.99047	3.81801	3.57209	3.92183	3.9025	3.92636	4.32439	3.67438	3.37837	4.0865	4.06403	3.75164	3.62583	3.52467	3.97801	3.83829	3.9538
SIGLEC11	6.70874	6.97988	6.63188	6.26633	6.48751	6.60159	6.38606	6.4676	7.05733	6.04341	6.58189	6.58225	6.88323	6.51349	6.84871	6.25826	6.01446	7.35383	5.84987	6.72184	6.89084	6.8448	7.05994	6.00949	7.19759	6.8891	6.22137	6.71559	6.38405	7.17055	6.76345	6.36282	6.36488	6.98156	6.98259	6.70045	7.13234	6.23068	6.49099	6.61801	6.48044	7.57712	6.91096	6.14845	7.30068	6.63065	6.4113	5.97578	6.79341
EFHC1	7.0831	7.01452	6.90965	6.81746	7.06017	6.73284	7.68542	6.46077	7.15637	7.90405	6.97252	7.20104	6.86874	7.39762	7.24712	7.26941	7.14569	6.98107	8.3588	8.03221	7.64087	7.22658	7.00495	7.88841	7.09524	7.46993	7.7157	7.21765	7.60262	6.93418	8.01678	7.21801	6.82441	6.92263	6.9668	6.94384	7.3367	7.09318	7.06931	7.17206	8.55664	7.04863	7.02132	7.04704	6.70372	7.52183	8.39514	8.27191	8.07663
NLRP3	5.61412	5.86162	5.69796	5.78859	5.36437	5.38495	5.27591	5.58021	5.48712	5.60328	5.44433	5.48068	5.15985	6.29189	5.25596	5.86409	5.93804	5.62031	6.58328	5.49653	5.69647	5.73114	5.22173	5.13646	5.42633	5.2344	5.45375	4.86327	5.53836	6.39071	5.36006	4.85338	5.0648	5.67	5.87043	4.95324	5.56889	6.53339	5.42006	5.87771	5.57651	6.03476	5.72768	5.725	5.88357	4.92623	5.62264	6.57007	5.6577
ERMAP	6.88076	6.74923	6.61889	7.23594	7.24778	7.16213	6.84189	6.98104	7.08435	7.48603	7.40286	6.73032	7.02145	6.59659	7.10848	7.62297	7.19705	6.5388	7.25894	7.25552	7.40963	7.61936	6.56754	6.69754	7.12901	7.26639	7.44908	7.41754	7.72696	6.73907	7.47578	7.03462	7.42913	7.57064	7.14445	7.41597	7.53339	7.82114	7.65739	7.95658	7.15567	7.02826	6.93741	6.63894	6.64814	6.38291	5.93729	7.22984	7.23211
PGLYRP3	4.00498	3.85465	3.74445	4.03806	4.04564	4.01639	3.7414	4.14848	3.78331	4.03367	3.95709	3.62566	3.96419	4.24427	3.92243	4.07483	3.87661	3.86613	3.87931	3.56919	3.91709	3.71318	3.78813	3.6543	3.6018	3.75546	3.63636	3.88194	3.85476	3.78433	3.80475	3.84324	3.82046	3.57779	3.95743	3.75516	3.84877	3.75743	3.82982	3.91399	3.80248	3.78249	3.96609	4.02043	3.81773	3.76306	3.93116	3.69839	3.64079
XKR4	4.01286	3.71053	3.55353	3.31006	3.29725	3.3854	3.57014	3.71069	3.5734	3.78731	3.68683	3.80169	3.88843	3.52053	3.6651	3.7678	3.57849	4.01006	3.91896	3.59917	3.61849	3.59273	3.60232	3.62469	3.51553	3.80101	3.56341	3.5891	3.5522	3.52234	3.7952	3.59622	3.75396	3.58413	3.75012	3.53116	3.8732	3.6739	3.74475	3.54059	3.15858	3.5588	3.6109	4.33347	3.71944	3.60036	3.83779	3.97561	3.60216
SLC25A25	10.0074	9.31814	9.91737	9.86929	9.47489	9.46724	9.13009	9.9522	9.55425	9.14726	9.33577	9.25746	9.26007	10.6194	8.79348	9.32054	9.33043	9.6722	9.23561	8.81899	9.21661	9.17069	9.00703	8.7062	8.93441	9.94175	8.44073	9.52449	9.38193	10.3981	8.97899	8.91009	8.70181	9.81779	9.45194	8.8739	9.05133	9.09895	8.76997	9.1286	9.25334	9.27284	9.19985	9.56246	9.33865	9.25329	9.2443	9.27426	8.85973
KLHL32	2.70073	2.95312	3.0828	2.65865	3.01054	2.69466	3.7899	2.63839	2.93223	3.73965	2.86511	2.80965	2.72695	2.72591	2.90852	2.65766	2.86519	2.55479	4.78666	3.35424	2.90874	2.53242	2.90032	4.41071	2.91513	3.42005	3.0678	2.41357	3.04298	3.0475	4.22843	3.03112	2.52838	2.75074	2.86743	2.8789	2.63769	2.7162	2.58276	2.55743	3.26039	3.10913	2.78199	2.64057	2.76077	3.4558	3.68812	4.90329	3.39388
PSMG3-AS1	6.79072	6.18396	6.72863	6.76276	6.00377	6.55364	6.49059	6.65217	7.13806	6.75994	6.38448	6.99853	6.69734	6.59069	6.05958	6.97737	6.46797	6.88752	7.22298	6.42114	6.86833	7.17212	6.4947	6.52873	6.8601	6.90183	6.87967	6.23655	6.9262	6.70932	6.68049	6.08138	6.32918	6.95739	6.53595	6.67332	6.62135	6.70896	6.74357	6.92209	6.94202	6.37284	6.6559	6.48734	6.13767	6.84438	6.50948	7.26541	6.43211
TMEM200A	8.01117	8.11622	8.54117	7.78431	7.74861	7.77947	7.63367	8.10489	8.55058	8.1899	7.7366	8.39455	8.14395	8.18849	7.73063	7.64586	7.99365	7.60112	8.0808	8.4743	8.17849	7.39833	7.42565	8.99156	7.8871	7.87658	7.86068	8.38471	8.25481	8.84269	7.69748	8.49968	8.71761	7.994	8.406	8.0794	7.64045	7.78263	8.4055	7.31167	7.73423	8.79298	8.1935	8.7047	8.31178	8.23652	8.40983	8.088	8.46337
GALNT13	4.87339	4.7945	4.64921	5.0306	4.74947	4.66463	5.00172	4.59816	6.15733	4.77312	4.93979	5.10439	5.07805	4.58646	4.9593	4.81953	4.98796	4.99652	4.28927	4.81308	4.94093	5.03519	5.12511	5.24441	5.34683	5.49055	4.70192	4.91151	4.5175	5.04673	4.73723	4.33726	4.88762	4.8694	5.04818	5.18634	5.11073	5.22011	4.75064	4.84867	4.93446	4.5865	4.88155	4.7473	4.55496	4.97833	5.08736	4.12164	4.86952
ZBED9	4.82637	5.68697	6.1497	5.79391	5.70093	5.58378	5.78236	5.66826	5.74577	6.05317	6.19607	5.85142	5.64149	5.51644	5.40968	5.49061	5.28238	6.08569	5.78211	5.78158	5.95168	6.00306	5.91596	6.16644	6.25132	6.01067	5.9052	5.68052	5.40687	5.04371	5.61282	5.84359	5.86739	5.99431	5.57979	6.02696	5.84371	5.96026	6.3691	6.27998	5.55488	4.97388	5.66214	5.52474	5.10725	6.22349	5.90062	5.84318	5.80056
SLAMF6	5.46346	6.2574	6.36773	6.27503	6.46719	6.2069	6.00464	6.30705	5.73934	6.357	5.96474	5.80678	5.8611	6.25395	5.82122	5.9918	5.86521	6.35472	7.67935	6.12989	6.21964	6.33112	6.18253	6.73539	5.98818	6.4299	6.82001	6.36924	6.88336	5.51462	6.37007	5.47533	6.59035	6.25057	6.46909	6.23566	6.12483	5.96347	6.12204	6.31779	5.83168	6.03384	6.16351	6.24739	5.92494	5.85023	5.76249	7.75823	6.15092
OSBPL6	6.50826	6.8553	6.72468	6.95124	6.92262	6.2984	7.84183	7.28083	6.84924	8.57887	7.41725	6.6381	6.59733	7.10399	7.0721	7.43103	7.0716	6.55113	8.71343	8.12365	7.78968	6.80724	6.96782	7.87747	6.58724	8.16772	7.76605	6.72206	7.48914	6.93321	8.27743	7.33542	6.66469	6.88964	6.16263	7.25593	7.52206	7.05495	6.65819	6.22221	8.3678	7.81126	6.97373	6.68438	6.71228	7.89967	8.708	8.64752	8.04861
C1QTNF1	6.92864	7.28286	7.25605	7.82614	7.37254	6.61493	7.12376	6.89616	6.83611	6.79655	7.08294	7.37392	7.21451	7.52895	6.56237	7.20857	6.6329	7.3715	6.67572	6.97326	6.30974	7.73806	6.6797	6.72039	6.88529	7.07005	7.01741	7.19563	7.19221	7.55614	7.0355	6.63791	6.66888	6.93365	7.20243	6.93929	6.93642	6.64151	6.79668	6.57948	6.71745	7.37912	7.50956	7.95086	7.58424	7.30626	6.65424	6.78498	6.99109
C1QTNF2	7.76703	6.18912	6.77306	6.07583	6.70268	6.33134	6.81416	7.15452	6.66119	6.82442	6.54888	6.42015	7.28002	5.7993	7.3051	6.55587	7.51835	6.57438	6.33872	6.7029	7.38496	6.1637	6.59979	6.30918	6.64312	6.61842	6.64706	6.64636	7.30165	7.41582	7.12281	6.93274	6.66179	5.88709	6.47005	6.22702	6.38396	6.72024	6.77499	5.66234	6.87028	7.40212	6.36154	6.50736	7.2763	6.24103	6.75433	6.37092	6.66222
CIDEA	4.84767	5.10526	5.03201	5.05993	5.12551	5.18886	5.12036	4.93052	5.01951	4.96902	4.92142	5.0924	5.0159	4.86971	5.05303	4.9334	4.78353	4.95612	5.01443	4.97925	4.69488	4.68146	4.9635	5.04496	5.11379	4.95363	4.89733	5.03787	4.80806	4.9287	4.84896	5.27567	5.13907	4.80499	5.79894	5.0081	4.7057	5.05531	5.16379	4.90668	5.01175	4.78112	5.1982	4.75637	5.00053	5.24411	5.40092	5.09927	4.94835
C1QTNF7	7.90311	6.29845	7.38304	7.77577	7.75824	7.36637	7.4702	7.48628	8.61896	8.14892	7.37226	7.35826	7.13348	7.50782	6.83793	7.84682	7.99895	7.07451	6.94447	7.1815	7.99402	7.23693	7.32759	7.71287	7.31126	8.09193	7.32122	7.58914	8.05154	7.56923	7.49156	5.60552	6.9323	7.65968	7.61595	7.88361	7.82711	7.96753	7.82503	6.9575	7.45483	7.67588	7.26789	7.52418	6.9743	7.77829	7.63924	6.98363	7.19306
FBXO32	5.21867	5.25651	6.72176	5.76684	5.91789	5.24102	6.01054	5.53287	5.5889	6.37946	5.79181	5.26305	5.50967	5.87039	5.65071	6.14505	5.22583	5.64576	6.13036	5.86214	5.43864	6.19196	5.74704	6.37201	5.87414	6.53021	6.95189	6.13031	6.34482	5.03672	5.71151	5.27188	5.71777	6.26025	5.68645	5.54296	5.49791	5.8315	5.57188	6.19931	5.79149	5.72941	5.96703	5.66359	5.85241	5.88016	5.95768	6.0906	5.71169
VASN	8.46666	8.2754	8.2825	8.02641	8.76452	7.86751	8.04703	8.15794	8.01986	7.71866	8.25983	8.65516	8.14137	9.01198	7.44674	7.89797	8.05684	8.35836	7.88168	7.98572	7.7634	8.43229	7.71989	7.51727	8.3827	7.86831	7.40607	8.48201	8.26226	8.68686	8.01655	8.07143	8.29165	8.00707	8.18052	7.87016	8.00628	7.87023	8.16749	8.26185	8.37642	8.06714	8.11423	9.56931	8.62535	8.53106	7.74953	7.86797	7.96814
CGAS	4.71871	4.7266	4.69429	4.87342	4.87532	4.73899	4.57293	4.54399	4.50538	4.54114	5.1995	4.79983	5.0486	5.04945	4.33463	4.88107	4.98081	4.83286	4.8845	4.65159	5.08404	4.53741	4.82244	4.38206	4.46684	4.52692	4.61539	4.44045	4.72939	5.07959	4.80572	4.62689	4.69871	4.84982	5.14119	5.04646	4.70342	4.26714	4.09234	4.99569	4.45184	4.74481	4.74383	4.9858	4.78339	4.70605	4.8198	4.90765	4.91046
SLC26A9	8.69063	9.7378	9.7416	9.58861	9.64784	9.14684	9.85198	9.20059	8.20641	8.58035	9.78181	10.3779	9.29096	9.87462	10.1839	9.93386	9.25642	9.95559	9.36201	9.18779	9.14891	9.60399	9.36523	8.84454	8.41172	9.15503	8.35734	8.79384	9.07971	9.8451	9.35938	9.17432	9.02689	8.53417	9.61949	8.97142	9.33604	9.64399	8.13325	8.8877	8.6034	8.6737	10.0179	9.79149	9.38206	10.4834	9.28573	9.39571	9.17527
OMA1	8.36174	8.88823	8.79933	8.21387	8.31814	9.05546	8.89079	8.57652	9.21806	8.71439	8.29603	8.78691	8.21128	7.79124	8.59317	8.23254	8.96019	8.61165	9.38911	9.30951	9.01843	8.35151	9.01715	8.89463	8.85459	9.14131	9.3792	9.19702	8.81824	8.15652	9.12895	8.71256	8.70406	8.41895	8.52916	9.45048	8.90665	9.10736	8.55833	9.19003	8.81561	8.7173	8.73384	8.02637	8.82756	8.7919	8.69031	9.2197	9.08897
DDIT4L	5.67074	5.2327	5.72508	5.80568	5.81887	5.38268	5.46144	5.6315	5.30487	6.27705	5.45557	5.4514	5.28448	5.30839	5.00211	5.46476	5.78329	5.31816	5.60371	5.947	5.69415	5.49072	5.3391	5.85163	5.44998	5.62838	6.16612	5.70044	5.1857	5.93925	4.98897	5.86485	5.49446	5.87138	5.9432	5.80359	5.69939	5.53161	4.9457	5.50597	5.58669	5.27978	5.56055	5.6773	5.59629	5.48562	5.54307	5.62559	5.95899
RAB42	7.33456	7.29787	7.16091	7.19841	6.95743	7.60538	7.38601	7.42856	6.97059	6.63074	7.10975	6.76411	7.35977	7.9549	7.3252	7.2516	7.21307	6.89063	8.06515	7.00708	7.8583	7.89815	7.45952	7.87771	7.28992	7.04846	7.32004	7.55288	8.13471	7.02092	7.94995	7.68515	7.96144	7.27969	7.01253	7.5764	7.00811	7.15647	7.14702	8.27541	8.01073	8.10065	7.77371	8.39702	7.15375	7.20388	6.66693	8.09548	7.17949
GPR146	9.11822	8.13645	8.70959	7.1426	7.85223	8.33869	7.73172	8.57761	8.44798	8.10302	7.94164	7.75047	7.51578	7.06409	7.412	8.50293	8.19238	8.25213	6.54854	8.5692	8.54811	8.84175	8.31579	8.27229	8.10882	7.98627	8.19326	8.30298	9.19832	9.22733	8.15376	7.7807	7.47054	8.30607	9.04404	8.60738	8.08514	7.95833	8.27751	7.60384	7.61321	8.94077	7.83095	7.76084	8.09221	6.7192	8.4891	6.53209	8.52181
FCRL1	3.75876	4.32609	3.70428	4.65269	4.08737	4.22012	4.0318	4.03319	4.0124	3.75798	4.05278	4.16437	3.8985	4.31078	3.72048	3.98324	4.52977	4.0385	3.6904	3.80396	3.91442	4.31875	3.99842	3.5499	3.94105	3.8852	3.99831	3.46311	3.6649	3.98886	4.05785	3.54433	3.87454	4.15317	4.061	3.84543	3.99872	3.81319	3.53479	4.23904	3.68635	4.07436	4.05226	3.92429	4.01668	3.79757	3.53592	3.46586	3.84657
FCRL3	5.17957	5.41878	4.9304	5.67492	5.10139	4.92656	4.8436	5.24552	4.86191	5.22132	5.27022	5.13071	4.8175	5.6147	4.6855	4.91102	4.78054	5.45737	4.75793	4.9814	5.43874	5.54987	5.19193	4.87561	5.01755	4.94598	5.47039	4.6066	4.56504	4.95911	5.32262	4.40069	4.77698	4.96152	5.47557	5.12765	5.57868	5.21952	5.01443	4.96529	4.47612	5.00979	4.9488	5.38101	5.0052	5.03671	4.70419	4.85582	4.91714
GBP4	7.96835	7.0064	6.60656	6.89936	7.00171	7.18523	7.09208	8.05525	6.97763	7.76225	8.25564	7.32852	7.00002	6.62818	6.48303	7.27814	7.15314	7.5487	7.01205	7.102	7.64959	7.51111	7.18314	7.15719	7.19708	7.98091	6.39539	6.86179	7.43132	7.64888	7.27434	6.61759	6.86178	7.74459	7.02154	8.06771	7.7576	7.67339	7.06947	6.30163	6.69845	7.32291	7.02406	6.76887	6.45699	6.96857	7.00199	7.14105	7.16506
GBP5	6.91378	6.53418	6.00845	6.69416	6.72292	6.74968	6.39687	6.75526	6.40003	6.49971	7.1469	6.50424	6.63128	6.99167	6.22557	6.60131	6.88464	6.8328	8.44007	6.52631	7.4422	6.7295	6.20349	7.56389	6.33662	7.49995	5.89759	6.40092	7.15588	6.80598	7.04975	5.59717	7.33667	6.51869	6.68728	6.76061	7.09691	7.92414	6.55065	6.10589	6.57473	6.53571	6.94819	6.09887	6.53306	6.42788	6.27783	8.54593	6.59613
NOSTRIN	9.32312	9.00637	8.52375	9.42167	8.91551	8.98425	8.91245	9.3595	8.52742	9.51272	8.10272	8.99344	8.02176	8.19508	7.9791	8.88854	8.53288	9.65546	9.00134	9.31143	9.44805	9.28183	9.31036	8.70915	8.90228	9.61675	8.48201	8.6863	9.02866	8.38556	9.3424	8.75073	7.56614	9.69686	9.33191	9.66501	9.47025	9.29458	8.50038	8.24947	8.68147	9.3763	9.06009	9.16323	8.30623	8.91004	8.3916	9.01294	9.32599
RASGRP4	6.93001	7.14764	6.69955	7.51201	7.29352	7.33146	7.07102	7.16041	7.3572	6.92548	7.05448	7.29093	6.48669	7.29429	6.55133	6.86796	7.48949	7.53196	6.20402	6.55833	7.1043	7.30628	6.95416	6.79268	7.1889	6.10768	6.64352	6.67741	6.7726	6.90648	6.81814	6.27344	6.53646	7.15511	7.29011	7.16009	7.31986	7.18259	6.89887	7.21774	6.71385	7.16903	7.07264	6.80079	7.03004	6.64694	7.226	6.16763	6.79168
ARL11	4.30687	4.39966	4.10898	4.51021	4.3133	4.71735	3.6863	4.22133	4.11719	4.02951	4.11251	4.25864	4.16755	4.13158	4.12682	4.47029	4.22499	4.49568	4.08444	4.0409	4.36375	4.46942	4.41834	4.38127	4.46311	3.78999	4.09436	4.20884	4.14389	4.3377	4.23748	4.05935	4.11278	4.37211	4.67947	4.39173	4.46077	4.58508	4.1853	4.7046	4.02604	4.37791	4.3726	4.26059	3.82482	4.04375	4.16838	4.12083	4.14647
IQCD	6.39179	6.55841	6.0985	6.07555	6.3152	6.20633	6.61553	5.93446	6.41348	7.042	6.28618	6.52932	6.20603	6.6923	6.26096	6.45429	6.52293	6.18299	7.46029	7.10599	7.07074	6.17967	6.71732	7.25435	6.27844	6.93016	6.61437	6.68542	6.83441	6.53487	7.33861	6.82315	6.33812	6.28042	6.26731	6.37836	6.40933	6.49044	6.08075	6.17691	7.37909	6.58592	6.6591	6.14473	6.26533	6.97937	7.7279	7.48112	7.13136
CTHRC1	9.14841	8.46458	9.10377	8.02879	8.83862	8.88377	9.42897	8.46472	8.43874	8.20006	7.86605	7.77341	9.1406	8.27367	11.387	7.93244	10.6995	8.10624	10.5168	8.25543	7.71418	7.7552	8.64539	8.91204	8.69053	7.60555	9.44735	9.27105	9.26565	7.80551	9.24447	9.75736	10.2286	6.81979	8.36156	7.52707	7.45695	7.79469	10.4708	7.77331	10.9796	8.62506	7.92699	9.94715	10.4637	7.06311	8.0518	10.5714	8.26056
ADCYAP1	6.962	4.63217	4.82116	5.08179	4.24903	5.56702	6.21341	4.44752	6.32163	6.96715	4.36389	4.31632	4.10635	7.29679	4.41788	4.23894	4.26758	4.30921	3.98209	4.55109	7.35454	6.01904	4.57813	6.14561	5.02764	4.47645	4.96564	4.22921	4.05701	6.99751	4.12881	4.11142	4.34035	4.20604	4.9405	4.28863	4.20303	4.31074	7.01544	5.16096	4.2898	4.31568	4.62202	6.28811	4.52314	4.78331	4.92978	4.04723	4.80012
CKMT2	6.09906	6.70751	6.31638	5.70396	6.28991	6.03148	6.16819	6.7229	6.57112	6.03664	6.04681	5.89057	7.01665	5.77455	5.9517	5.98853	5.77547	5.95405	5.81849	6.55153	5.92508	5.63748	5.96783	6.02243	5.89946	6.43745	6.59525	6.14692	6.1967	6.43982	6.12912	6.62974	6.67798	6.00888	6.19685	6.01791	6.49638	5.71573	6.02754	5.85207	6.54076	6.59539	5.96007	6.07799	6.06029	6.30013	7.01342	5.86544	6.49513
RMI2	6.43938	5.99302	6.89417	6.84598	6.64647	6.73219	7.01928	6.60188	6.42163	6.31455	6.68423	6.68979	7.00743	6.44503	8.34261	6.89913	7.7385	7.03665	6.98176	6.05001	7.32299	6.10567	7.44867	7.25727	5.70579	6.38907	7.51965	5.67126	6.66729	6.20244	6.77307	6.02806	6.97479	6.0807	6.07071	6.50014	6.99737	6.88475	7.07735	7.1624	7.69446	6.88243	6.25235	6.00013	7.48627	6.07967	7.08886	6.97677	6.03828
OSR2	6.28019	5.66682	8.01048	6.2535	6.98747	6.60355	6.62138	7.48927	7.37483	6.39349	6.12844	6.03435	6.34328	6.14575	5.54563	6.16669	7.09719	6.26267	6.02176	6.50115	6.38937	6.62802	6.94969	6.71981	6.03716	6.64463	7.3605	6.84319	7.2506	5.44595	6.3359	6.49492	7.90033	6.32766	5.8325	5.62315	5.88512	6.03535	6.53851	6.59077	6.53882	7.19016	6.93928	7.25777	7.30654	6.5202	6.81067	5.96365	6.51543
BATF2	7.81004	7.24312	7.18445	6.98153	6.97431	6.97174	7.12403	7.60562	7.30279	6.75553	7.63017	6.76695	7.34404	8.29769	6.60637	7.26055	7.52037	7.06049	7.12403	7.11668	7.89094	7.32174	7.38149	7.14434	7.03721	7.16238	7.19618	6.87541	7.44302	8.13509	6.83613	6.46712	7.11512	7.09755	7.00099	7.48292	7.27633	7.38191	7.1264	6.57294	6.58153	7.34206	7.15471	6.75873	6.86042	6.97351	7.09423	7.19472	7.09809
LRRC3B	3.61589	3.13054	3.20267	3.14768	3.06767	3.14836	3.07434	3.26109	3.42867	3.06378	3.32924	2.98346	3.61802	2.98625	3.01131	3.26422	3.15977	3.30689	3.07126	3.15384	3.33575	2.94547	3.61243	3.01255	3.33442	3.30512	3.11158	3.02516	3.08152	3.22421	2.71655	2.89028	3.19122	3.0749	2.99707	3.1168	3.10768	3.14546	2.8438	3.26458	2.85717	3.31542	3.38499	3.18093	2.84323	3.03903	2.91043	3.0818	3.14223
PHACTR3	8.09003	8.29309	8.62965	9.04825	8.57331	7.91935	8.45288	8.27549	8.55348	7.5275	8.6854	8.69261	8.41594	7.9026	9.11182	7.92399	8.69542	8.07732	8.14541	9.00551	8.49245	8.34906	8.9567	8.9326	8.17856	8.31939	8.48208	8.73579	7.47206	7.06952	8.03032	7.8943	8.65832	8.4199	8.13987	8.87148	8.08931	8.93811	8.66073	8.86682	8.36417	7.12586	7.61866	7.78217	8.78423	8.45686	8.84843	8.19005	9.0453
CYYR1	9.96447	8.2665	8.9832	8.80892	9.03122	8.98604	8.66422	8.96992	9.3015	9.24323	8.70785	8.72274	8.15958	8.62639	8.59829	9.19969	9.27891	9.23693	8.84215	9.40711	9.19983	9.4218	9.35695	8.86065	9.19664	9.69432	8.39759	8.85915	9.30924	9.23022	9.04458	8.56169	8.38251	9.73154	9.27478	8.73385	8.88623	9.15278	9.12629	8.09243	9.1321	9.73547	9.10821	8.85032	8.46792	8.98852	8.45272	8.87515	9.45973
CMTM5	6.52488	5.58697	6.25689	5.98767	5.75748	6.10664	6.11731	5.74036	5.73961	6.17169	6.08551	6.10978	5.93082	5.72603	5.77771	6.24643	6.11772	5.88314	5.41662	5.82364	6.26162	6.12176	6.4541	5.60355	5.5597	5.85948	5.79695	5.54735	5.73251	6.04896	5.85467	5.7133	5.88719	5.97497	5.96726	6.92629	5.94158	6.41357	5.72025	5.60509	5.78338	5.96676	6.00488	6.25814	5.73149	5.94181	5.75368	5.44026	5.85517
C8orf34	4.72994	5.59439	5.27262	4.27748	5.29921	4.88697	5.69463	4.01309	5.11371	5.10746	4.3772	4.79365	4.61199	5.14315	5.20779	4.33242	5.00472	4.5751	6.11823	5.14022	5.04536	4.31274	5.83865	5.94182	5.44919	4.69059	5.09184	5.62673	4.86545	4.64447	5.43634	4.88525	5.09926	4.42059	4.43983	5.26687	4.53955	4.36113	4.81373	5.224	4.93659	5.4134	5.40481	4.47189	5.39953	4.36001	5.55297	5.79587	5.45496
PANX3	3.08325	3.155	3.11953	2.81988	2.8546	2.99437	2.9074	2.69487	2.88793	2.89532	2.7898	2.955	3.05788	3.00398	2.97297	3.14204	2.96794	3.11489	3.01061	3.03863	3.10781	2.97662	3.00454	3.02183	2.68943	3.28791	3.11178	3.00505	2.81018	2.88713	2.91705	2.86703	2.86039	3.19622	2.87601	2.93965	3.112	2.77379	2.77984	3.24155	2.99076	2.81918	3.09569	2.91266	2.90085	2.98501	3.00261	3.03321	3.12072
EXOC3-AS1	6.78178	6.18767	6.49915	6.38401	6.21402	6.63772	6.79827	7.45713	7.10632	6.84438	6.62419	6.98528	6.84242	6.28397	6.88384	6.86946	6.51652	6.80888	5.99692	6.40057	6.0121	6.42824	6.46455	6.08747	6.89014	6.79664	6.34859	6.63394	6.10468	6.21044	6.71472	6.58643	7.02517	6.53857	6.51199	6.28222	6.79134	6.35401	6.65005	6.30161	6.52278	6.60687	6.95485	6.20797	6.99827	6.48826	6.68187	5.96587	6.34505
RBP7	9.10211	8.79466	8.99051	8.74474	8.78813	8.86001	8.34304	7.97577	9.15608	8.63979	8.97121	8.14865	8.30734	8.71769	9.00698	8.9525	9.16277	8.98254	8.3432	9.81004	8.19088	9.0127	9.15793	8.47384	8.2408	8.53733	8.95411	8.50385	8.35406	9.68718	8.59372	8.6597	8.82473	8.94618	9.73688	9.02874	9.09325	8.71365	9.42378	9.90326	9.47138	8.43822	8.56239	9.1232	8.93275	9.08938	9.70678	8.33581	9.82922
SLC26A8	4.93324	5.17096	4.96671	5.43371	5.09995	4.9391	4.89937	4.70753	4.98732	5.08787	5.36812	5.01049	4.49046	5.30376	4.38871	4.93966	5.17494	5.15775	4.38438	4.68169	4.88805	4.94602	4.91912	4.68941	5.02829	4.47616	4.53748	4.47148	4.36593	4.92917	4.69451	4.97389	4.86867	4.83994	5.61577	5.1661	4.88945	5.00065	4.47343	5.12486	4.83554	4.61112	4.98507	5.02863	4.76728	4.85365	5.08004	4.46855	4.74036
LYPD1	4.59215	5.18863	4.47197	4.83263	4.68663	4.67714	4.90653	4.82988	4.66864	4.44437	4.47343	5.62014	4.68509	5.35257	5.62158	4.67212	4.78228	4.60467	5.54377	4.85785	4.68964	4.73198	4.90732	5.14806	4.75342	4.59773	4.71445	5.36601	5.20757	5.03904	5.07465	5.1414	5.03267	4.67786	4.69466	4.90039	4.6734	4.92065	4.71664	5.06577	4.93033	4.98561	5.07981	4.96495	5.19584	4.94571	4.75805	5.71497	4.93988
TM4SF18	9.78296	7.80609	7.08087	8.21205	8.71458	7.5842	7.61	7.66826	9.01203	7.88205	7.60141	6.7998	8.81441	7.72133	8.52366	7.37865	8.15841	8.18254	7.09271	9.0848	7.62702	7.79405	7.9519	6.85365	7.64991	7.92616	7.85962	8.7052	8.42441	7.76317	7.93182	9.51663	8.93821	8.57088	8.39178	6.54815	7.92555	7.9141	8.48307	6.55602	9.3038	7.87498	7.83324	7.83511	8.42883	8.59471	8.5539	7.18975	9.03003
RAB39B	4.61059	4.40865	4.33437	4.38486	4.68896	4.0745	4.07688	4.44043	3.8593	4.56223	4.24043	3.83408	3.88657	4.4039	4.05745	4.10631	4.16044	4.32869	4.56357	4.12876	3.9773	4.9951	3.82153	4.03491	4.09797	3.7998	5.33128	3.68341	4.19624	3.83588	4.40724	3.68986	4.39248	4.61614	4.52582	4.18528	4.29999	4.4058	4.06166	4.03893	3.95384	4.22501	4.0191	4.27257	4.06013	3.99404	4.01795	4.61292	4.09845
OLIG1	5.33721	5.3469	5.39685	3.9845	5.18577	4.86778	5.30658	4.66902	4.63575	6.08109	6.38439	5.11422	3.98178	4.43059	4.85876	5.69073	5.98091	5.44625	5.5638	4.98179	4.82303	4.81433	4.09483	5.05757	4.35307	4.59715	4.30041	5.15259	4.57329	4.91072	5.04468	5.55964	5.54395	4.53121	5.17473	5.06585	6.11638	5.36103	5.02331	4.79542	5.48208	3.72201	4.62852	4.62056	4.98778	4.16962	5.77335	5.63214	5.10438
MRGPRF	9.39529	8.4886	8.51037	7.36067	8.01064	8.14708	8.80199	8.99108	8.98755	8.27641	8.36158	8.6288	9.04736	8.14472	7.74373	8.4146	8.48903	8.17892	8.41677	8.73374	8.29902	8.10888	8.51357	7.71596	8.28238	7.65075	8.17524	8.75988	8.91531	8.34144	8.84658	9.39143	8.75045	8.3186	8.66472	8.22898	8.535	8.55069	9.29018	7.76716	8.7284	9.32548	8.53614	8.73079	9.37375	8.23436	8.24095	8.40519	8.7288
RPL39L	6.21475	6.30637	6.56606	5.97007	5.83792	6.20163	6.54073	6.40809	6.2368	6.21535	5.95566	6.35253	6.25656	5.81116	6.50878	6.06965	6.38358	6.17859	6.4072	6.08623	6.04162	6.18707	6.18293	6.39741	6.14943	6.11686	6.97726	6.17783	6.50229	5.89723	6.45996	6.4693	6.35257	6.01668	6.25584	6.00693	6.5503	6.53222	6.90631	6.1427	6.51157	6.55734	5.87709	5.95133	6.77127	5.73082	6.02855	6.394	6.16412
LRG1	7.81686	8.58706	8.41668	8.7482	8.41929	8.33693	8.10404	7.7451	8.20753	7.96126	8.17085	8.34532	7.84447	9.25816	7.05055	8.5553	8.42705	8.17104	7.56704	8.05047	8.1114	8.53103	8.25971	7.58364	8.40317	7.4704	7.8314	8.03426	7.48957	9.20109	8.44904	8.04122	7.71375	7.91475	9.42718	8.47432	8.1639	8.05453	7.09523	7.74011	7.69221	8.00712	8.81058	9.10213	7.37283	8.80036	8.5744	7.59344	8.04943
WDR17	3.9131	3.9473	3.92472	3.70889	3.82278	3.8766	3.97431	3.8019	4.2378	4.12195	3.67062	4.47353	3.7828	3.64693	3.69719	3.90507	3.85421	3.97569	4.03753	3.79231	3.85557	4.01869	3.69609	3.74659	3.92986	4.30858	3.83799	3.98589	3.7008	3.67593	4.20318	3.7968	4.02485	3.62707	3.80685	4.20694	4.16337	3.72763	3.82888	3.58917	3.81154	3.82003	4.61979	3.57761	4.12201	3.89528	3.95988	4.07761	3.75763
SCGB3A2	13.3916	13.2283	13.854	12.5935	13.643	13.6023	13.7002	13.3243	13.3944	13.8187	13.472	11.6645	12.6809	13.7626	13.4545	13.6239	13.4829	12.2384	13.9947	13.3778	12.8787	12.1517	13.59	13.9127	13.3249	13.6041	14.34	12.8708	13.3288	13.6867	13.5534	12.5128	12.586	13.4894	13.2192	13.2076	13.669	12.953	12.541	14.003	14.0791	13.6013	13.8788	12.8254	12.9382	12.7089	14.1263	14.0591	13.3674
SH2D1B	5.19287	5.46937	4.50871	5.23222	5.09291	4.77176	4.95139	4.79043	4.75644	5.0498	5.97901	5.30109	4.61896	5.08195	4.70063	4.76574	4.78233	5.60953	5.09406	4.75232	4.93659	5.74675	5.27182	4.6934	4.90196	4.79409	4.21895	4.22435	4.60437	5.04303	5.47437	4.31869	4.3487	4.91858	5.18718	5.53939	5.69732	5.19066	5.73347	4.60606	4.38381	4.72656	4.51449	4.74641	4.80138	4.76873	4.64547	5.19063	4.87807
MRGPRX3	3.4721	3.7089	3.74115	3.90488	3.76436	3.664	3.81679	3.70168	3.40918	3.77397	3.75566	3.84084	3.89033	4.05242	3.77974	3.90985	3.60803	3.76669	3.82115	3.59213	3.48475	3.41451	3.61591	3.36832	3.54759	3.41635	3.60291	3.35082	3.49291	3.60021	3.59327	3.50021	3.66625	3.60013	3.94086	3.64781	3.50083	3.32498	3.63942	3.6362	3.5572	3.38549	3.72092	3.62988	3.65927	3.72614	3.74656	3.8382	3.60675
SLC16A10	7.77174	7.6578	7.76521	8.2849	7.29392	8.58537	7.26759	7.73689	6.94854	7.10965	7.30062	7.63166	7.41609	8.49086	7.00354	7.68824	7.61181	7.31908	8.1662	7.14051	7.24457	7.74341	7.21026	7.4869	7.41341	7.11567	7.14604	7.01117	7.73101	7.40749	7.44241	7.16985	6.87869	7.44502	7.79679	8.07369	7.60083	7.54808	7.03801	8.32194	7.36341	7.34159	7.20457	8.15954	7.31393	7.38835	7.56577	7.92382	7.37263
GALNT15	8.27259	8.22626	9.70302	9.09295	9.51496	8.59564	9.03918	7.88065	9.20856	10.1966	8.14408	9.264	8.90783	9.33355	7.24839	8.44514	7.40044	9.14532	8.36044	8.33976	6.96702	9.63565	8.97246	9.53429	10.1587	8.58893	8.42545	10.1267	9.32466	6.72672	9.09265	8.91684	9.13142	10.6157	9.46584	7.90097	8.16785	9.26724	9.2364	8.83063	9.7112	9.52691	9.04791	9.25228	9.50003	9.95594	9.14464	8.26982	8.34234
IP6K3	6.43089	6.78367	6.70593	6.97742	7.0038	6.21913	6.83093	7.07998	7.16293	6.48623	7.65166	6.22566	7.64594	7.13133	6.85949	7.2538	6.53828	6.84892	5.4677	7.2836	6.5628	8.02833	7.3122	6.34861	6.52302	6.35333	6.85868	6.72325	6.57004	5.18857	6.64779	6.20956	7.44605	7.56603	6.07083	7.72033	7.65703	6.87826	7.16878	6.51809	6.49246	6.73528	6.98084	7.03011	6.52226	8.23697	6.93194	5.48068	7.24377
TAGAP	6.33122	6.46734	6.61332	6.01954	6.63956	6.79519	6.32457	6.92906	6.22901	6.49872	6.24799	5.97117	5.58779	6.60186	5.81809	5.75419	6.45811	6.65885	6.67708	5.99508	6.81941	6.19497	6.80713	6.34944	6.32279	6.4972	6.42472	6.43805	6.12107	6.41333	6.34099	5.85132	6.5632	6.31716	6.59353	5.96243	6.50098	6.38788	6.3925	7.01444	6.35782	6.54693	6.81127	5.95271	6.58948	5.05443	6.20376	6.50787	6.10014
CLC	6.32875	6.15267	5.23439	7.69525	7.14622	7.09758	4.37389	5.43388	5.0317	6.49695	6.20252	6.90255	4.89268	6.44119	6.24592	5.88706	8.00905	7.44088	6.70698	5.78268	9.2583	5.12219	5.66174	7.82804	6.27753	4.10087	7.3398	5.9355	5.8342	8.01928	6.32635	4.56599	4.87892	5.71417	5.34199	6.49323	5.62617	8.03522	6.34055	8.13021	6.05372	6.29007	6.41814	5.66697	5.41143	4.92261	5.79665	6.71438	5.76713
TRIM6	7.13528	6.20857	6.71099	6.14645	6.7664	7.13826	7.0136	7.39233	7.11668	6.7497	6.75433	6.74583	7.13081	6.51097	7.14495	6.66023	7.1966	6.83871	7.23387	6.60674	7.26746	6.45307	6.91473	7.01533	6.4943	6.96981	8.62004	6.65121	7.18427	6.54152	6.70006	6.59248	7.35431	6.41809	6.17814	6.39542	7.28657	6.75491	7.46752	6.8088	7.37278	7.61318	7.07864	6.73431	6.90796	6.87921	7.037	7.27286	6.61569
MUCL1	4.57687	5.11385	4.86527	4.99564	5.12097	4.88067	5.37787	4.61089	4.45311	5.30885	4.96485	4.74137	4.41352	5.86694	4.95559	5.40435	5.5509	4.94956	5.18598	5.57155	5.20416	4.84875	5.22873	4.72386	4.79749	5.35107	5.80231	4.30583	5.43783	5.23374	5.36624	4.68005	4.60588	4.97901	4.8872	4.88944	5.28646	4.5535	4.39676	4.81768	5.01789	5.16959	4.94504	4.62303	4.81656	5.63811	5.64282	5.09295	5.36211
CFAP70	5.64839	5.73151	5.06355	4.92003	5.43909	5.20381	6.46137	4.71346	5.78148	6.92634	5.6817	5.3483	4.94741	6.13247	5.54126	5.79679	5.18683	4.98591	7.54225	7.0568	6.75447	5.11925	5.53075	7.12487	5.28668	6.14471	6.24671	5.61719	6.15215	5.85355	7.22536	5.52919	5.11919	5.43537	4.90749	5.49341	6.07259	5.44456	4.70266	5.84065	7.3817	5.84995	5.56121	5.15106	5.38264	7.07807	7.12316	7.28133	6.8392
BTBD16	3.58001	3.83377	3.94599	3.85716	3.94614	3.83335	3.49632	4.04429	3.8696	3.84709	3.73483	3.56898	3.8419	4.14564	3.82911	3.98983	3.62566	3.78981	3.50102	3.70746	3.72318	3.98859	3.83019	3.54406	3.83002	3.74157	3.91996	3.61435	4.06743	3.55369	3.78038	3.66985	3.6964	3.47603	3.6297	3.61374	3.51386	3.91196	3.96988	3.89278	3.56463	3.72179	3.71154	3.75642	3.86208	3.98884	3.71093	3.45213	4.02178
ANKRD22	6.50659	8.3016	6.88194	8.524	7.5086	6.92896	6.70141	6.22946	6.84778	6.64379	7.39593	7.4203	6.36052	7.84563	6.50412	7.48985	8.39004	7.04116	7.77941	7.01832	7.06702	7.52826	6.6492	8.2604	6.68686	7.15137	8.10037	7.37775	7.30769	7.95854	6.81385	6.85086	7.78798	7.16526	7.31301	7.75622	7.46548	7.34026	6.47179	7.09005	7.08862	6.91436	7.72166	7.38197	6.73841	6.68645	7.11251	7.84965	7.04666
CLRN3	4.1125	3.83065	4.08532	4.25807	4.07092	4.1533	4.27233	4.0699	4.1463	4.18499	4.0272	3.94233	4.26798	4.28648	4.09987	3.98244	4.06021	4.24747	3.84439	4.29415	4.33283	4.16792	4.18582	3.99814	4.04506	3.77225	3.84314	4.70295	3.8659	4.12638	3.81621	4.99498	3.9517	4.19313	4.20834	3.98369	3.96847	4.04708	4.21837	4.13726	3.96022	3.81065	3.89402	4.07064	3.78363	4.19339	4.01541	3.90151	4.18276
PNLIPRP3	3.95313	3.81764	4.04735	3.99596	3.99798	3.92776	3.94344	3.95615	3.74136	3.78995	3.86056	3.80663	3.97621	3.92788	3.91692	3.69961	4.00808	3.76693	3.8163	3.73353	3.7614	3.60557	4.11269	3.98845	4.11763	3.89455	3.82331	4.02902	3.98336	3.80641	3.92348	4.54589	4.37545	3.94204	3.78082	4.3012	3.81475	3.81829	4.00317	3.92517	3.7169	3.68681	3.61128	4.4181	5.04973	4.00808	3.62244	3.82537	3.74416
FAT3	4.95907	5.03303	4.46524	5.03139	5.0287	4.97064	5.66794	5.14077	6.30425	4.90183	5.16362	5.37913	5.5611	4.8738	5.07987	5.74748	5.30684	5.06828	4.33934	4.92851	5.22039	5.10504	5.29364	4.65077	5.09741	5.48706	5.67928	4.70368	5.29708	4.77987	5.01732	4.78951	5.18526	5.37033	5.2869	5.28172	5.27299	4.91764	5.43875	4.976	4.87114	5.25125	5.0661	5.52517	4.84638	5.16963	5.18795	4.60188	5.08682
COLCA2	6.28134	6.50997	7.00302	6.16693	6.70646	6.46967	7.01279	6.81895	6.71111	7.46315	7.12266	6.34306	6.5833	6.1588	6.74898	6.84626	6.08435	6.75434	7.55852	6.82113	6.83645	6.89227	6.59114	7.70527	7.12932	7.56849	7.74636	6.89364	6.50711	6.41851	7.47363	6.45912	6.71684	6.78808	6.78377	6.53375	7.21256	6.62275	7.01813	6.98866	7.48673	6.7982	6.66402	6.23284	6.51861	6.89402	7.46222	7.60755	6.80754
PIH1D2	5.86941	5.78996	5.28994	5.05241	5.65177	5.57392	6.52883	5.68402	5.70027	7.28928	5.88694	6.2937	5.39459	5.95649	5.99786	5.54967	5.85931	5.07236	7.98169	7.24582	6.95039	5.5041	6.16025	6.90477	5.63611	6.80279	6.23273	5.81611	6.41194	6.0438	7.24004	6.16859	5.76938	5.26274	5.17532	5.81688	6.10314	5.62762	5.22214	5.37547	7.45014	6.26634	6.56299	5.41709	5.59777	7.34073	7.94723	7.94542	7.19428
JAML	9.76653	9.94209	8.88646	9.97204	9.76353	10.2486	9.06929	9.46946	10.1676	9.9297	9.79085	9.37712	9.13461	9.57289	9.16315	9.68323	9.75804	10.2935	9.59502	9.23502	10.487	9.80239	10.0233	10.0242	9.64898	9.9992	9.33697	9.51234	9.33635	9.8491	9.87532	8.9513	9.6755	9.95736	10.0556	9.32585	9.9437	9.75773	9.64948	11.3349	9.31811	9.21388	9.02006	9.06742	9.27597	9.21915	9.75455	9.59914	9.23715
DEPDC4	2.99431	2.87025	3.39654	3.11192	3.14256	2.87782	3.19203	3.0322	3.44721	3.21176	3.02005	3.07697	3.08982	2.87994	3.22984	3.30297	3.29797	2.95862	2.93704	3.29248	2.80287	2.97853	3.3613	3.55742	3.25517	2.99274	3.32842	3.09418	3.30149	3.00695	3.23848	3.39731	3.18683	3.19126	2.9794	2.97599	3.59219	3.27204	3.57473	3.13527	3.01125	3.06497	3.418	2.99436	3.39169	3.06326	3.00915	2.77047	3.11221
TMEM52B	5.17633	5.431	4.79162	4.17259	5.21119	5.8646	5.52991	5.57829	5.01578	4.78678	4.69373	4.67663	5.50568	5.45229	5.43048	5.19832	5.97907	4.98098	5.8895	5.33691	5.78906	4.83514	5.44907	5.34709	5.46316	5.32687	5.087	5.00413	4.84426	5.54681	5.11227	5.20244	5.87426	5.16892	4.30916	4.92755	5.47235	5.48726	4.98912	5.98278	4.57913	5.35065	5.65863	5.3675	5.6347	4.66138	4.37154	5.83896	5.23233
LRIG3	6.44325	7.15112	8.4519	6.91669	7.20124	6.70233	7.22017	7.55615	7.44458	7.40814	7.18054	7.50102	7.07055	6.71336	7.55032	7.65995	6.85452	6.76113	7.06038	7.22648	6.92416	7.42754	7.49511	8.36337	7.78049	7.19354	8.41436	7.5874	6.91686	6.75186	7.3703	8.13491	8.12324	7.78017	7.39902	7.15343	7.42606	7.09817	7.4941	7.5599	7.38074	7.2906	7.60812	7.23645	7.33251	7.42755	7.60469	7.04458	7.27379
TMEM132D	4.67166	4.25337	5.13852	5.24286	5.01981	4.15003	5.7673	4.60936	4.36375	4.67117	5.20621	3.83759	4.57855	4.39113	4.40092	5.82706	4.65305	4.2825	4.34482	4.62408	4.13594	4.68926	4.16955	4.75335	4.14245	4.15013	4.43319	5.43265	4.30326	4.35407	4.54996	4.25613	4.4119	4.80093	4.81019	3.97168	4.21918	4.03473	4.31731	3.95703	4.44739	4.14343	4.42997	6.03884	3.9714	4.20658	4.82903	4.36581	4.64076
GTSF1	6.4043	5.37889	5.35053	5.52786	6.41212	5.74995	6.4095	5.63341	5.02757	5.68245	6.18418	5.6261	5.19864	5.40516	5.26209	5.99388	5.55185	6.53501	6.46607	6.06117	6.57634	5.43387	5.37067	5.45297	5.89318	5.84171	6.11384	6.32495	5.85919	7.39934	5.5986	5.28826	5.30908	6.95778	6.44287	6.14119	6.17646	6.03535	5.94095	7.58501	4.53525	6.25863	6.37275	5.8195	6.16429	5.82916	6.70398	6.40109	5.9775
CMA1	5.18846	4.46428	5.55884	4.81125	4.68412	4.91795	4.72632	4.41116	4.45302	5.05115	4.20468	4.56963	4.59581	4.89825	4.75125	4.93739	4.61866	4.62288	4.53367	4.38978	5.24687	4.74155	4.2103	5.07804	4.77183	4.78748	5.12015	4.51033	4.48858	4.67992	4.82669	4.38883	4.49387	4.4621	4.73762	4.63375	4.46688	4.62877	4.64836	4.55389	4.67465	4.3789	5.16715	4.75763	4.80517	4.59556	4.62316	4.60393	4.2855
ERP27	9.07175	9.13226	8.33965	9.49554	9.17829	7.16846	9.67583	8.69543	9.6334	10.0076	8.95012	8.55581	10.1349	9.4647	9.00688	7.73276	9.90153	7.17135	11.2492	7.8783	10.1736	9.37178	9.35094	10.3447	10.2587	10.4688	11.324	9.56312	9.09695	9.02676	10.0977	8.83678	8.72656	10.0572	6.46117	9.36324	9.19278	10.0075	6.8544	9.75828	10.1738	9.57	10.1357	8.67367	8.76407	10.4638	10.3523	11.2677	7.8128
BTBD11	4.30761	4.38171	4.7107	4.44795	4.53992	4.27152	4.68907	4.29395	4.88695	4.57533	4.68993	4.26278	4.29246	5.07852	4.34863	4.56067	4.60788	4.53053	4.45005	4.51911	4.56636	4.30367	4.31052	4.20136	4.23862	5.13852	5.90065	4.22222	4.39107	4.31855	4.36766	4.08446	4.06162	4.52359	4.61801	4.21255	4.76163	4.54116	4.37335	4.29827	4.39355	3.95203	4.38731	4.4459	4.18412	4.65318	4.5802	4.48485	4.50154
SPIC	2.72031	2.72845	2.66189	2.80948	2.86879	2.78014	2.62814	2.87554	2.88512	2.70601	3.22303	2.91427	2.77903	2.84261	2.60354	2.98903	2.76219	2.95435	2.84093	2.62044	3.02085	2.78277	2.58687	3.19368	2.58614	2.68914	2.9735	2.66425	2.91922	2.61884	2.69674	2.9095	3.05791	2.69312	2.74147	3.03311	3.02882	2.81134	3.07846	2.83912	2.95499	2.68845	2.72872	2.68223	2.6327	2.76135	2.69905	2.95895	2.64039
METTL21EP	3.9764	3.91139	3.72571	4.17184	3.78346	3.86942	3.74951	3.75283	3.96361	3.74237	3.64559	3.75043	3.93083	3.90862	3.94414	3.96695	3.77733	4.06155	3.84516	3.86813	3.99796	3.71556	3.79426	3.71962	3.9423	3.40806	3.61546	3.82022	3.88253	3.76205	3.71438	3.96131	3.89089	3.94207	3.97821	4.04029	4.04294	3.59597	4.06279	3.89972	3.74951	3.79161	3.90941	4.143	3.63257	3.40008	3.72641	3.72748	3.96505
TEX26	3.95503	3.84986	3.80468	3.73623	3.64826	3.67065	4.35321	3.60896	3.65625	4.69424	4.02907	4.16977	3.93074	4.10965	4.33234	4.26753	3.32785	3.60611	5.44144	4.41879	5.87517	3.77782	3.85392	3.9531	3.68229	4.10228	4.07636	3.74093	3.95213	3.99417	4.05457	4.60555	3.82614	3.35885	3.90014	3.60967	3.7166	3.77515	3.85757	4.03168	4.74066	4.59069	3.86777	3.91851	3.81453	4.90673	4.44521	5.36266	4.44178
SLAIN1	7.47149	7.3934	8.69788	7.88521	7.69	7.87452	7.56258	7.72167	7.75981	8.09126	7.82848	7.51527	7.50004	7.44455	7.58594	8.17763	7.89984	7.62705	7.77629	7.29033	7.84195	8.20404	8.22741	8.44931	7.87141	7.73354	7.38507	7.57219	8.27729	7.78068	7.6533	7.81262	7.52788	8.09381	8.22771	7.71184	8.59346	8.50301	7.59369	7.47742	7.27407	7.47297	7.97368	6.8874	7.57428	7.79839	7.63241	7.78501	7.30475
TDRD9	7.03704	7.67765	7.58391	7.43704	7.87166	7.06614	7.68447	8.58525	6.82453	7.17732	7.42944	8.4066	7.46478	7.48423	8.29578	7.59412	8.13395	7.04937	7.93759	7.57926	7.23073	7.85885	7.87249	7.98042	8.32399	7.17045	7.46254	7.28973	7.49943	6.60273	7.67073	6.36763	7.32988	7.24749	7.17872	8.06938	7.53113	7.78289	7.25473	7.2268	7.54018	8.56017	7.61493	7.44345	8.11785	7.67177	8.04228	7.95355	7.54706
AK7	5.61604	5.81473	5.4584	5.3338	5.52298	5.22897	6.31625	5.39153	5.5274	6.84504	5.75872	5.83007	5.49186	5.65526	5.67491	5.52201	5.59738	5.51704	7.26885	6.56281	6.40782	5.77429	6.06864	6.33072	6.14826	6.2337	5.71003	5.93158	6.13389	5.87131	6.84997	6.19245	5.16008	5.36634	5.30207	5.57521	6.29111	5.90722	5.79582	5.25044	6.95282	6.32962	6.12475	5.46164	6.00178	6.65559	6.59563	6.32584	6.16154
FRMD6	10.0088	8.89562	8.62832	9.26636	9.19237	8.67525	8.71247	9.07302	9.23591	9.08277	9.41113	9.77154	9.43169	9.01167	9.02945	8.76792	9.01857	9.4196	8.6721	8.66546	8.88929	8.96042	8.81585	8.54461	8.90605	8.64452	9.28793	9.42068	8.86139	9.81552	9.17038	9.99035	9.69882	9.05617	8.78261	8.58533	8.91352	8.87571	9.36228	8.04038	9.4567	9.16081	8.67888	10.3654	9.56066	9.51193	8.57149	8.6613	8.55583
CCR1	10.1127	10.4415	9.02664	9.9018	9.99995	10.0996	9.48208	9.67307	9.47639	8.41885	9.83816	10.2608	9.47492	10.4562	8.34484	9.15593	9.87032	9.99669	9.83169	9.70781	9.93098	9.51663	9.72293	8.55119	9.56827	8.11829	8.35478	9.70311	9.75831	10.7513	10.0659	9.49676	9.65935	8.57557	9.81217	10.0132	9.48238	8.99522	8.79762	9.85685	10.1597	10.1796	10.0794	10.7052	10.0732	9.65075	9.36256	9.87316	9.72648
SLC24A4	5.69923	5.43196	5.28981	5.59544	5.74664	5.6657	5.05376	5.33412	5.82176	5.59905	5.83398	5.49614	5.3275	5.46808	4.81711	5.37184	5.08302	6.22425	5.1992	5.48603	5.71854	5.79087	5.45207	5.12568	5.44612	5.45268	4.84964	5.09935	5.27801	5.32364	5.3413	4.54249	5.12219	5.70041	5.75354	5.24391	5.8827	5.36714	5.13013	5.61673	5.35369	5.90983	5.43422	4.973	5.36287	5.31482	5.29151	5.13734	5.36463
CCR3	4.0926	4.24688	4.28537	4.71951	4.36449	4.68464	4.45824	4.59056	4.37759	4.19411	3.90641	4.20895	4.35884	4.80649	4.4328	4.50149	4.28155	4.62414	4.74821	4.39805	4.80864	3.95386	4.51418	4.35196	4.25507	4.17879	4.43125	4.41579	4.38747	4.60921	4.41488	4.26604	4.51353	4.2498	4.62048	4.3532	4.42606	4.09943	4.45478	4.63108	4.23379	4.4823	4.25277	4.41197	4.272	4.22461	4.32611	4.8393	4.40781
SENP8	5.84393	6.22062	6.12043	6.004	5.72421	6.21134	6.21537	6.2554	6.3928	6.15353	6.11749	6.01019	6.10394	5.49019	5.87421	6.00068	6.35084	6.19943	6.66453	6.16528	6.36804	6.02078	6.29666	6.36534	6.18763	5.87196	6.30574	6.09202	6.3225	5.56506	6.12444	6.217	6.30192	6.03237	6.13911	6.5162	6.33418	6.60338	6.24578	6.55031	6.09399	6.23991	6.23587	5.53746	5.92088	6.12763	6.56687	6.67397	6.21517
SLC51B	7.74418	6.13119	6.32109	6.51844	8.06885	7.00439	5.76615	8.01767	8.35221	6.5788	7.85389	6.68365	6.76695	6.56432	6.69687	6.22825	7.72961	7.66372	7.32954	6.50502	7.10596	6.85909	6.20567	6.45207	5.94349	7.07906	5.94959	6.28584	6.94299	7.81561	6.50212	6.58895	6.99869	6.55567	7.91595	7.70008	8.10479	7.00415	7.11931	7.2046	6.74587	6.65279	6.69558	5.80472	7.85347	6.6282	6.98994	7.49873	6.57115
CCR5	8.3129	8.37319	7.30796	7.64482	8.37509	7.93428	7.82232	7.7459	7.59626	7.72407	8.05803	7.68058	8.06672	9.04996	7.56481	7.39803	8.17093	8.44459	9.80171	7.50072	9.04443	7.34293	7.72748	8.36045	7.40252	7.4464	7.34202	8.06291	8.11758	8.36424	8.53239	8.07269	7.93163	6.6891	8.06585	8.24674	8.24208	7.2938	7.46741	8.56078	7.81623	7.68741	7.83102	9.11429	8.19715	7.23459	7.41712	9.93653	7.55169
CCR6	5.31176	5.09433	5.45322	4.85512	4.71127	4.83681	4.88607	4.48775	5.09241	4.91808	4.94389	4.62004	4.76188	5.80381	4.69888	4.88302	4.99888	5.34703	5.51294	5.12443	5.2372	4.67686	4.5806	4.52527	4.31157	5.57914	6.1504	4.61947	5.25454	4.91828	4.57235	4.56966	4.96926	4.59794	5.10676	4.50207	4.78028	4.78396	4.86836	5.4315	4.7015	4.75929	5.14889	5.1186	4.76752	4.50933	4.88657	5.55187	5.07217
TMEM266	6.27329	7.24129	6.40673	5.77813	6.24709	6.47095	6.95596	6.94115	6.44572	5.90428	6.8153	6.60047	6.78379	6.27118	6.85217	6.33588	6.73145	6.14738	6.38987	6.60799	6.47419	5.77928	6.59879	6.26947	6.78361	6.4561	7.21206	6.52403	6.97064	6.25338	6.60509	6.85537	7.67108	6.04382	5.79266	5.94919	6.44928	6.32949	6.97274	6.51494	6.22539	6.64207	6.38573	5.93615	6.66938	5.94209	7.11507	6.4075	6.58315
CCR7	4.90427	5.80917	5.73636	5.74885	5.7464	5.83593	5.46413	5.45633	5.1623	5.49112	5.78021	5.25528	5.41937	6.61876	5.50061	5.84789	4.92164	5.57119	6.35852	5.45956	5.33415	5.70785	5.06164	5.51894	5.14822	5.67073	6.37814	5.2585	5.44672	5.9154	5.39269	5.00766	5.3319	5.20661	6.17542	5.00762	5.22006	5.6438	5.24251	6.12607	4.97086	5.02704	5.91226	6.38085	5.08654	5.22349	5.37177	6.83754	5.41129
DNAAF1	6.61921	6.63793	7.02585	6.36731	6.50158	6.84139	7.10408	6.66455	6.25148	7.56156	6.31068	6.53444	6.21138	7.33725	6.74844	6.58329	6.27973	5.76947	8.14786	7.51327	7.14776	6.4789	6.32098	7.12665	6.13548	7.03563	7.37527	6.36565	7.0432	6.64396	7.52212	6.52486	6.03986	5.88958	6.7753	6.30536	6.66287	6.65599	5.8617	6.097	7.99216	6.99732	7.03315	6.7562	7.04593	7.78176	7.71636	8.05292	7.555
DCUN1D3	8.98122	8.77794	8.891	9.57295	9.00606	9.00408	8.52115	8.85147	9.12826	8.53544	9.04071	8.92937	8.93055	9.68925	8.58712	8.74836	9.15882	9.03436	9.14478	8.77798	8.84618	8.55483	8.38778	8.24921	8.77203	8.88818	8.5717	8.65035	8.96733	10.1359	8.86726	8.62239	8.62297	8.94658	9.04317	8.54844	8.87218	9.02065	8.74605	8.15954	8.5383	8.82924	8.61528	9.09157	9.2834	9.13892	8.66202	9.02084	8.65785
CCDC78	6.75606	6.70612	5.2744	5.44823	6.42383	5.60969	7.48272	5.91556	6.25155	8.3195	6.57854	6.66172	5.65225	7.29367	6.93742	6.72376	6.54749	5.43631	9.19777	8.2627	7.98247	5.8164	6.95164	7.96626	6.29376	7.30313	7.36943	6.67579	7.68608	6.90943	8.22542	6.90299	5.94227	5.92774	5.70598	6.50171	7.07908	6.21448	5.23417	5.50241	8.72046	7.18058	7.23365	6.3247	6.42783	7.82744	9.03473	9.14796	8.16393
LTB4R	7.1835	7.86505	6.99946	7.90269	7.74018	7.2571	7.06659	6.80669	7.34044	7.30121	7.40263	7.36589	6.72118	7.37259	6.69863	7.25259	7.76529	7.59054	6.78662	7.255	7.36262	7.24421	7.48231	7.19703	7.1233	6.98589	7.057	6.982	7.11064	7.00569	7.28372	6.93814	7.03114	7.33307	7.57015	7.35222	7.3918	7.36495	7.02783	7.61368	7.36824	7.16272	7.21843	7.33504	6.78668	6.89856	7.48198	6.92624	7.2715
ZG16B	5.36419	5.45464	5.4036	5.28719	5.38306	5.39769	5.80044	6.172	5.8068	6.41039	5.3983	6.46535	5.56422	6.24758	5.28654	6.05382	5.61474	6.5515	5.50797	6.08194	6.31906	5.63295	5.94391	6.36585	5.63983	6.15393	6.74848	5.5297	5.93965	5.11803	5.39666	5.50526	5.77381	5.76817	5.93042	5.26385	5.77206	5.84809	5.58862	5.64728	5.69696	5.71372	6.14162	5.65909	5.39066	5.83353	5.65261	5.53148	6.11698
HSF5	4.08208	3.86884	4.00047	4.13459	3.90545	4.30083	4.02449	4.0414	4.0666	4.07842	4.21966	3.93048	4.05184	4.0524	3.86145	4.03801	3.85903	4.1092	3.91458	3.98033	4.08457	4.0929	4.02809	3.69762	4.09407	4.09108	3.99005	3.89985	3.81953	4.45033	3.67451	3.78462	3.86362	4.00233	3.93963	4.01549	4.29169	4.41863	3.82693	4.61882	3.91083	3.7433	4.10839	3.91328	3.89115	3.89797	3.92332	3.93576	4.09436
ZPBP2	3.4619	3.32536	3.39594	3.30857	3.28496	3.32572	3.36733	3.1536	3.20249	3.31033	3.48258	3.16139	3.82822	3.37713	3.42946	3.25218	3.44705	3.46999	3.2981	3.38142	3.32352	3.45082	3.26222	3.56695	3.32097	3.24945	3.10545	3.24145	3.30373	3.30303	3.6041	3.13516	3.30825	3.23885	3.57721	3.52461	3.25309	3.33678	3.12521	3.53692	3.41209	3.21834	3.18179	3.33961	3.29734	3.30072	3.23224	3.30223	3.56332
C17orf64	4.30239	4.58456	4.45498	4.18812	4.16756	4.26554	4.15271	4.35656	3.85095	4.38198	3.92105	3.8035	3.78483	4.25601	3.92621	4.49771	4.29876	4.37436	4.25809	4.19097	4.18015	4.34404	3.92232	4.07192	4.15815	4.29671	4.20519	4.23253	4.09626	4.29167	4.24398	4.02044	4.13395	4.25662	4.53186	4.14414	4.16805	4.29119	4.09886	4.468	4.08612	4.25466	4.59221	4.3302	4.05544	4.13948	4.42952	4.20763	4.17055
HEXIM2	6.08506	6.05711	6.53029	6.0449	6.05642	6.37223	6.16657	6.40768	6.8053	6.47042	6.11099	5.80759	6.5253	6.06941	6.35116	6.57078	6.6294	6.16922	6.53416	6.53277	6.83113	6.5128	6.58646	7.33893	6.237	6.55779	7.1692	6.36511	6.87893	6.0363	6.48613	6.25292	6.72159	6.68537	6.24776	6.53368	6.34452	6.85998	6.74811	7.178	6.48141	6.32692	6.46346	5.63581	6.36942	6.25749	6.34562	6.56735	6.54146
CNTD1	4.82316	5.01408	4.92451	4.98925	4.93164	4.71276	5.31347	4.60662	4.97784	5.55176	4.95008	5.07597	4.77964	5.02979	5.15674	5.24969	4.88499	4.96293	5.26574	6.17064	5.74327	5.04594	5.05564	5.27554	4.76739	5.60883	5.36206	4.99979	5.4734	5.23706	5.7626	4.95692	4.88921	4.7902	4.76577	5.13134	5.07585	4.86212	4.91758	4.80895	5.48034	4.81162	5.1693	5.22477	4.85998	5.79901	5.44167	5.36955	6.1516
GGT6	6.0995	6.46641	6.68791	6.28264	5.98504	7.58946	7.25569	6.52307	6.85354	7.42939	6.87467	6.6535	6.45824	6.34878	6.82505	7.54787	7.10661	6.69304	6.97943	6.66612	7.04301	6.76636	6.18848	6.90518	6.44841	7.07322	8.45141	6.8432	6.93138	6.79097	6.93957	6.76216	6.90132	7.08037	6.38114	6.78344	6.24747	7.0471	5.63887	6.47858	7.27449	6.20119	6.51336	6.64821	6.19241	7.00035	7.50736	6.97803	6.67775
SPNS2	8.94084	8.65956	8.49783	8.84029	8.76497	8.92137	8.47015	8.93125	8.2023	8.22245	8.53698	9.38982	8.18318	7.97269	7.40766	8.48375	8.6577	8.93844	8.18511	7.89192	8.80915	8.54905	8.86063	7.84484	8.29246	8.69625	7.55649	8.14173	8.56908	9.28573	8.56025	7.67491	7.53487	8.62645	9.2264	9.32103	8.89528	8.603	8.21372	8.55625	8.2914	8.83444	8.69722	8.93848	7.89603	8.43241	8.5255	8.21373	7.85845
KRT222	4.28921	3.08693	3.9361	3.18236	3.2317	3.68267	3.65426	3.23988	3.44205	3.37672	3.26787	2.97381	3.46706	3.16001	3.35948	3.0775	3.40297	3.40235	3.32496	4.02069	3.50766	3.10008	3.7028	3.27108	3.57212	3.51859	4.05737	3.86471	3.53753	3.49928	3.27529	3.20769	4.05681	3.5341	3.27197	3.15806	3.3538	3.20633	4.03358	3.31505	3.45138	4.00783	3.30705	3.32918	3.75713	3.02939	3.52866	3.31508	3.89932
ADH1C	6.88045	6.39922	7.47007	6.48392	5.96794	6.25687	7.15537	7.40944	7.16643	8.09555	6.83963	6.91811	6.66687	6.85589	6.79493	6.99769	6.75241	6.71852	7.22059	7.09585	7.09822	6.68434	6.88649	7.4504	7.14176	8.31636	8.71846	7.42335	6.88094	6.30325	6.83832	6.41567	6.40849	7.47339	6.54958	6.18997	7.72069	7.26109	6.85561	6.94529	7.50396	6.95876	6.4094	6.20257	6.83928	8.16949	7.05019	7.15613	7.05414
OSCAR	7.90944	8.20484	7.59182	7.66618	8.09152	8.18562	7.31122	7.97504	8.17131	7.27289	7.7739	7.74242	7.43921	7.42968	7.97714	7.88775	7.78676	8.32482	8.0597	7.53264	8.29759	7.76505	8.05425	8.01683	7.50452	7.44456	6.31786	7.61026	7.00595	8.2323	7.60775	6.42399	7.29074	7.76562	7.70632	7.49904	7.79442	7.80115	7.65558	8.65604	8.08775	8.53932	7.94274	8.07013	7.85451	7.55158	7.68649	8.0494	7.50678
ZNF441	3.83972	4.03106	3.96451	3.48734	3.81511	3.62961	3.56531	4.11152	3.976	3.98093	3.8673	4.08219	4.06373	3.59688	3.9975	4.14037	3.50399	4.0444	3.60041	3.79641	4.03081	3.94819	3.74825	3.63222	3.88165	3.46406	3.84853	4.08465	3.62094	3.21828	4.27029	3.67227	3.71959	3.65161	3.7716	4.03779	4.28598	4.07703	3.92251	3.90313	3.75093	3.56083	4.21084	3.5996	3.62295	3.76035	3.76815	3.59487	3.70529
CNGA3	3.03821	3.31317	2.96337	2.89522	3.02238	2.74436	2.75711	2.81613	2.54931	2.9078	2.85949	2.71672	3.18311	2.86512	3.08083	2.74621	2.71812	2.75121	2.8977	3.27515	2.98175	2.93877	2.85	3.04283	2.70632	3.03472	2.86991	2.91571	3.21332	3.21067	3.07919	2.85	2.86601	2.99293	2.71672	2.78364	2.84298	2.94301	3.21167	3.19055	3.31906	2.97985	2.69515	2.57739	2.94828	3.1067	3.04445	2.92637	3.29003
CNGA4	4.31439	4.31719	4.27822	4.28723	4.33535	4.1194	4.82067	4.22038	4.09391	5.03468	4.30683	4.74082	4.06288	5.06268	4.46648	4.69893	4.3796	4.06109	4.7022	5.10026	4.55317	4.35246	4.29351	4.70275	4.10114	4.28312	4.35832	4.38073	4.47863	4.18617	5.25699	4.8766	4.36594	4.14913	4.16286	4.21968	4.8507	4.2265	4.17516	4.1143	5.18397	4.97541	4.16525	4.03157	4.02476	4.91467	5.49912	4.82592	5.03444
ZNF573	7.92567	7.725	7.5347	7.6399	7.66781	7.91922	7.68753	7.86223	7.98068	7.9726	7.52599	7.32097	7.72013	7.65121	7.15491	7.63356	7.63394	7.96106	7.58344	7.52722	8.01626	7.98546	7.62863	7.92743	7.79129	8.00917	7.97951	8.04449	7.94702	7.09045	7.65985	7.62891	7.98313	7.8974	7.69515	8.10772	7.83534	8.04012	7.97148	7.6949	7.71371	7.87916	7.66021	7.42472	7.15527	7.63626	7.93889	7.55272	7.5062
EID2B	6.14525	5.9555	6.00969	6.18765	6.09007	5.65002	6.75096	6.98409	6.61699	6.75569	6.6337	6.80186	6.62195	5.70756	6.70545	6.24203	6.65995	6.31616	6.29448	6.81836	6.6508	6.02747	6.85321	6.66066	6.57321	6.78269	6.48318	6.33796	6.06777	5.77874	6.80732	6.49225	6.75798	6.83048	6.09864	6.82858	6.64158	6.66124	6.41209	6.59079	6.75234	6.70721	6.5561	6.0892	6.67942	6.52059	7.11682	6.32532	6.86526
TNFAIP8L1	8.74	8.37047	7.82856	8.03307	8.55751	7.97072	8.4538	8.10293	8.78033	8.88068	8.49529	7.98897	9.16169	8.26482	9.48162	8.1368	7.79875	8.33086	9.09345	9.03074	8.87036	7.76571	8.06095	8.54771	7.94294	8.47053	8.49629	9.25191	8.50768	8.37225	8.68161	8.84349	8.35345	8.54986	7.97562	7.88922	8.37722	7.65493	9.15407	7.77913	9.07348	8.57756	8.3334	8.08246	9.0292	8.5519	9.36658	9.11365	9.03258
ZNF57	7.56051	8.24993	7.88582	7.55103	8.19437	7.24155	8.00854	7.60613	7.45491	7.97473	8.06569	7.8981	8.33735	7.42542	9.1043	8.05101	7.21561	7.60909	7.81232	8.1874	7.45643	8.17106	8.2188	8.32767	8.16537	7.48208	8.38953	8.56035	6.9658	7.47242	8.23995	8.31948	8.11708	7.54555	7.61525	8.17899	8.23584	7.61089	8.07605	8.29353	7.56604	7.20348	7.67404	8.12326	7.9106	8.02797	7.87628	7.88953	8.20114
PLK3	7.83861	7.81716	7.40493	8.04217	8.04213	7.91736	7.71872	7.6565	7.12079	7.27238	7.47648	7.69361	7.17007	8.49051	7.02891	6.92813	7.89224	7.70826	7.77995	7.20745	7.5438	7.29718	7.34313	6.66041	7.26659	7.82172	6.2423	7.64281	7.31224	8.25356	7.62526	7.23743	7.03737	7.49369	7.66697	7.11118	7.03455	7.38891	7.44719	7.45473	7.63327	7.41602	7.30748	8.07137	7.67005	7.62729	7.78646	8.08411	7.51543
ZNF792	7.30987	7.20099	6.93144	6.44015	6.88999	6.86046	6.88941	6.74974	7.1701	6.73073	7.48888	6.97758	6.87304	6.3317	7.05255	7.14284	6.64804	7.01169	6.34938	6.89269	7.1374	7.20998	7.05522	7.15645	7.28511	6.65505	6.95629	6.87614	6.93609	6.59389	6.80359	7.16862	7.37104	7.45679	7.25228	7.95761	7.389	6.75503	6.98698	6.97973	6.96714	6.96283	6.28483	7.30467	6.69039	6.84191	6.56034	6.37996	6.87502
HSPB6	7.29175	6.84657	6.99643	6.71858	7.0716	6.85722	6.91784	7.42575	6.96836	6.84113	6.44925	6.21403	7.00451	7.15771	5.84803	6.42708	7.26968	6.35645	6.56321	7.32013	6.2953	6.45202	7.0278	6.01731	6.77843	7.25159	7.77148	6.99318	7.22887	6.59241	6.9236	6.98688	6.68338	6.0474	6.35182	6.80958	6.33828	6.81633	7.03329	6.05113	7.4847	7.69693	6.93768	7.88274	6.73471	6.73552	7.49009	6.58614	7.26714
CNN1	9.58516	9.29514	8.54232	9.0593	9.0706	8.99187	10.3284	9.46343	8.42736	8.76019	9.01936	8.67579	8.98399	8.5902	7.87383	9.70696	9.51718	8.93469	8.07634	8.83984	8.54894	8.65822	8.8589	7.83177	8.26682	8.8398	8.64118	9.14253	8.83721	8.21822	9.99747	8.83132	8.49812	8.98952	8.01815	8.78211	9.12625	9.31846	8.92863	8.24302	9.32724	8.7416	8.54731	9.41618	9.17803	8.69931	8.73651	8.06383	8.83691
RPTN	3.02618	2.89984	2.82883	2.8268	2.90564	2.78979	2.94815	2.92861	2.96979	2.97968	2.7832	2.69017	2.88267	2.78566	2.92951	2.76929	2.89512	2.71655	2.94316	3.02251	2.79467	2.86055	3.07589	2.83524	2.91211	3.26583	2.77017	2.93249	2.93492	2.89065	2.57476	2.89782	2.9359	2.71327	2.84262	2.55599	2.96284	3.01823	3.09336	3.39386	2.78997	2.89417	2.70773	3.04303	3.11624	2.75526	2.9612	2.92907	3.06274
CNR1	5.67082	6.32873	6.73331	6.53431	6.2096	6.57173	6.48107	5.97872	5.89989	6.16198	5.99905	6.09382	6.05946	6.20045	6.84657	6.133	5.8422	6.04949	6.35004	6.18631	5.60523	6.4711	6.61424	6.59232	6.60755	5.7466	6.12155	6.19108	6.31933	6.18037	6.41709	7.00973	6.47227	6.59729	6.4784	6.46117	6.36165	6.2018	6.30627	6.57895	5.7285	6.45905	6.84488	6.43262	6.48504	6.0855	6.16	6.00916	6.10753
KLHDC9	7.86999	8.11513	8.51418	8.21868	7.83521	8.31605	8.80526	8.52852	8.43637	9.20937	8.31075	8.69202	7.88724	7.9484	8.02674	8.61635	8.2761	8.23807	9.46273	8.74227	8.86006	8.27899	8.36593	8.67895	8.35649	9.0241	8.5807	7.86584	8.6056	7.7798	9.34578	7.77879	8.06772	8.18536	7.94958	8.00642	8.79537	8.88989	8.45187	8.38428	9.15862	8.42149	8.24905	7.79464	8.1623	8.80855	9.5883	9.38875	8.7351
MAB21L3	3.34889	3.57864	4.57685	3.03491	3.64805	3.4946	3.2963	3.45477	3.35761	3.19098	3.78423	3.32147	4.32394	3.50746	3.31385	3.82565	3.56046	4.72945	3.1978	4.27707	3.55555	3.51408	3.61034	4.2196	3.43701	3.69119	3.26453	3.64204	3.32292	3.18583	3.14472	4.0432	3.33404	4.02917	5.12693	4.11942	4.72293	3.74778	3.42426	3.96318	3.34889	3.50698	4.14647	2.85164	3.02114	3.545	3.41542	3.28959	4.30355
SLC44A3	8.23443	7.68896	8.04524	8.60153	7.43527	8.60933	7.80185	7.79928	8.43056	7.96329	7.6108	7.93835	8.46986	7.50243	8.45999	7.77446	8.77738	8.66668	8.07624	7.18331	8.70292	8.51274	8.52842	8.84927	8.8825	8.75105	8.51469	7.8789	8.50049	8.22987	8.91009	7.6731	8.64307	8.56507	8.20475	8.24994	8.4661	8.75594	8.45602	8.19434	8.47331	7.37642	7.55221	7.19416	7.48103	8.23198	8.15085	8.07585	7.23289
CNTN1	4.26406	3.89037	4.0595	4.36541	4.08751	4.54985	4.05569	4.33822	5.22936	4.15235	3.96129	4.02217	4.11023	4.19851	4.37323	4.20156	4.86433	4.02145	4.31132	4.03094	4.36287	4.23182	4.18695	4.62768	4.03726	4.20579	5.36971	4.18133	4.35137	4.64852	4.43777	3.97828	4.09834	4.45115	4.22348	4.39445	5.31278	4.61414	4.24269	4.50946	4.33466	4.06709	3.85657	4.45924	4.06443	4.21053	4.19791	4.23128	4.07403
ERICH3	3.8822	4.01197	3.32344	3.18693	3.72657	3.46387	5.00959	3.35587	3.68525	5.57461	3.96732	4.019	2.9663	4.40234	4.55596	3.81958	4.01322	3.16787	6.81516	5.83818	5.25486	3.33428	4.17443	5.17362	3.43935	4.97412	4.46032	3.90532	4.74781	4.43842	5.60944	4.47257	3.48768	3.46326	3.16891	4.02985	4.40674	3.53416	3.22295	3.23335	5.68695	4.66471	4.56184	3.36173	3.4418	5.26735	5.9454	6.26244	5.46483
LRRIQ3	3.23923	2.94413	3.51139	3.80574	3.06931	3.50315	4.35242	3.49767	3.57071	4.8545	3.46053	3.87698	3.22297	3.71892	4.19718	3.51771	4.13064	3.45289	4.60386	4.83483	4.13565	3.41041	3.69007	4.36443	3.22983	4.01909	3.77881	3.68546	4.12803	3.45135	4.30014	3.83878	3.96849	2.90186	2.98828	4.45465	3.81546	4.03078	3.97719	3.90646	3.98386	4.16275	3.87728	3.1202	4.00479	4.33916	4.65168	4.39639	4.66597
DMBX1	2.96189	2.89573	2.82152	3.10535	3.1422	3.54073	2.96959	2.94112	2.92132	2.59067	2.84712	3.03029	2.92292	3.13328	2.85179	2.92261	3.19781	2.97458	2.97838	3.03293	3.12044	2.79791	2.95493	2.8257	3.03706	2.9235	3.08994	2.68954	2.92592	2.76347	3.21773	2.86687	2.80286	2.75196	2.87751	2.93012	2.71885	2.78698	3.12598	2.97243	2.70691	3.34242	3.13912	3.01452	2.91437	3.11398	3.51156	3.02561	3.04185
LRRC39	3.95161	3.9411	4.44211	4.12433	4.21416	3.86386	3.99385	4.33529	3.82368	3.94329	3.98379	3.8014	3.90564	4.81807	3.69977	4.29965	3.99016	4.26635	3.83931	3.73844	3.87583	4.34471	3.90039	3.91032	3.92643	3.81993	3.71519	4.01449	3.95853	3.95374	3.69876	4.00287	4.29163	3.64862	4.2765	3.6951	3.85559	3.71154	4.13563	4.27626	4.40444	3.7895	3.81423	4.38636	3.94173	3.78971	3.65477	3.58861	4.05747
COL1A1	9.62975	9.26008	9.31529	7.71805	8.70575	8.84394	9.34674	9.44539	9.10706	8.04869	8.86045	8.34109	9.24978	8.68166	9.45669	8.98638	10.529	8.62319	9.87845	9.27495	9.10928	7.24891	9.3052	8.42825	8.64776	8.05075	9.33691	9.14385	8.93591	8.06402	9.4734	9.94597	9.76856	7.94022	8.48057	8.07081	8.77389	8.19687	9.82577	8.65987	10.4097	9.18417	8.81835	9.06266	9.70878	7.9525	9.07854	9.82129	9.25103
OSCP1	7.81344	8.73293	7.90785	7.89481	7.95632	7.8315	8.76191	8.1657	8.22906	9.02117	8.31424	8.22435	8.09834	8.05326	8.06182	7.91353	8.00649	7.86117	9.50963	9.03039	8.88006	7.93946	8.34344	8.86633	8.27483	8.72892	8.59832	8.80986	8.5261	7.96578	8.9985	8.57933	7.85331	8.12941	7.57381	8.40174	8.36055	8.29401	8.49147	8.16233	9.18253	8.80838	8.62076	7.6013	8.33988	8.78025	9.77005	9.5718	8.94024
UBXN10	6.28951	6.41716	6.30121	6.03755	6.61029	6.07148	6.87075	6.18515	6.14014	7.42245	6.50602	6.63253	6.10997	6.77218	6.44186	5.94067	6.39214	6.05922	7.85593	7.4724	7.17113	6.25902	6.52366	7.56855	6.27937	6.88953	6.731	6.41599	6.63745	6.80472	7.48403	6.26719	5.80153	6.12543	5.90774	6.39072	6.49563	6.3606	5.92757	5.80622	7.39628	6.79094	6.59868	6.17175	6.32717	7.19608	8.17276	7.65618	7.47834
C1orf87	5.73258	6.28342	4.55156	5.12097	5.94257	4.57874	7.21986	4.55671	5.50089	8.47575	6.44185	5.89058	4.71515	6.28706	6.11599	5.90014	5.5762	4.74698	8.78565	8.37329	7.14272	4.74051	5.93493	8.07476	5.42158	7.40537	6.67002	6.72418	7.06402	5.94539	8.05632	6.34457	5.00863	5.71636	4.66642	5.90881	6.92941	5.43196	4.21937	4.71432	8.34173	6.84957	6.5286	5.58703	5.79338	7.67977	9.44637	8.69966	8.1795
COL1A2	11.5941	11.1106	11.0083	9.85234	10.6917	11.0162	11.5054	11.474	11.4743	10.2165	10.8634	10.3856	11.4781	10.468	11.6481	11.2469	12.4168	10.5356	11.4707	11.5364	11.2876	9.52977	11.2951	10.1018	10.8267	10.372	11.6667	11.2842	11.245	10.3099	11.5229	11.9524	11.6254	10.5956	10.2266	10.5534	11.2914	10.6363	11.8042	10.3989	12.313	11.3671	10.6127	11.3067	11.8718	10.4065	11.2707	11.3578	11.4751
GOLT1A	7.65731	8.84763	8.85643	7.82955	7.99681	8.52012	8.15539	8.42397	8.65911	7.99381	8.09979	8.60288	8.10043	7.84417	7.50641	8.52581	7.98997	8.65382	7.82073	8.61082	8.04174	8.28842	8.02821	7.66682	8.37131	8.24946	7.1099	8.21755	7.84606	8.23179	7.9794	8.20694	7.93315	8.18802	9.04342	8.31127	8.78168	8.84325	8.06308	8.55167	7.64893	7.38937	8.13189	7.5785	7.99607	8.97439	7.80126	7.82178	8.60407
FCRLB	5.85123	5.98763	6.29375	5.32687	5.92996	6.04181	5.89687	6.20266	5.79596	5.95034	5.70046	5.87793	5.94785	5.80601	5.90694	5.54282	5.962	6.08438	5.89174	6.11134	6.12871	6.00292	5.94483	5.84939	5.7024	5.53804	6.06949	5.08383	5.8854	7.215	5.8799	5.57449	6.26437	5.68756	5.92302	5.51328	6.0887	5.58849	6.88074	6.14437	5.96982	7.33782	5.84777	5.53601	6.29632	5.11022	5.37554	5.96117	6.19976
COL3A1	10.8207	10.1101	10.3039	8.77937	9.43741	9.96604	10.7285	10.4687	10.5018	9.251	9.77637	9.48982	10.7511	9.56646	10.7502	10.3813	11.4409	9.65081	10.9141	10.5456	10.1649	8.48116	10.5348	9.19094	9.81388	9.46425	10.8442	10.4062	10.5515	8.90323	10.9102	11.3564	10.813	9.56833	9.25687	9.48384	10.2908	9.57003	10.8634	9.63158	11.3472	10.6464	9.80163	9.97701	11.0161	9.067	10.1272	10.5059	10.258
SPATA17	4.98595	5.0473	4.7847	4.46525	4.92591	4.71975	6.27018	4.89779	4.81671	6.90045	5.43058	5.25493	4.62649	5.62131	5.13602	5.81921	5.19651	4.39732	7.41348	6.54124	6.39919	4.48288	5.46277	6.59648	4.80211	6.14125	5.9215	5.19842	5.91652	5.39233	6.22751	5.54952	4.71394	4.83058	4.54661	4.96158	5.45764	5.23492	4.53748	4.53804	7.15911	6.0554	6.09383	4.96097	4.93071	6.78743	7.54053	7.44263	6.77615
PIFO	8.33644	8.7796	8.35652	8.00846	8.63779	8.50947	9.53117	8.58832	8.59585	10.3079	8.76725	9.139	8.1383	9.06461	9.04809	8.94522	8.59662	7.80956	11.0735	10.4342	10.1828	8.11795	8.91208	9.70557	8.81443	9.63294	9.35859	9.1421	9.65432	9.38782	10.1225	9.18288	7.93419	8.01435	7.75186	8.36949	9.26459	8.57561	7.90317	8.37644	10.7553	9.69755	9.48142	7.59945	8.83514	10.3749	11.0674	11.0072	10.4063
VSTM2L	7.35495	7.23533	7.38126	7.05362	7.45373	7.79602	8.51317	8.29623	6.79571	8.1024	7.42967	8.24826	6.82925	7.96236	7.47118	7.4891	7.51403	7.30672	8.63544	8.00742	8.07526	7.39643	7.78605	8.54533	7.54763	7.83342	8.08522	7.31833	7.92792	7.46698	8.57787	7.94424	6.90198	6.84895	6.99617	7.03247	7.66636	7.06709	7.18632	7.20002	8.79049	8.43083	8.01966	8.17106	7.97596	7.97516	8.83603	8.68703	7.99822
WFDC12	6.323	7.01523	7.36618	7.1644	6.94101	7.17575	6.84977	6.78487	6.55046	6.52216	6.96963	6.66461	6.97543	7.83695	6.50855	7.24331	7.12352	7.6723	6.52395	6.76936	6.54616	7.16221	7.2513	7.29988	7.12772	6.86137	6.34544	6.88334	6.41291	6.49452	6.75663	6.18171	6.74445	7.16543	7.25359	6.76767	6.77677	6.65095	6.29996	8.22656	6.53601	7.43557	8.15203	7.37746	6.16406	7.57243	6.36821	6.54713	6.76305
C20orf85	8.33594	8.86917	4.67115	6.07839	8.04356	6.63222	9.77723	7.299	7.56735	10.8927	8.59904	8.55246	6.36649	9.25072	9.06218	8.71564	7.91197	5.90365	11.4506	10.9943	10.4698	6.31988	9.1783	10.4345	7.70739	9.97038	9.73049	8.68741	9.74839	8.79215	10.8055	9.18105	6.97227	7.40028	5.96652	8.2479	9.27272	7.64196	4.77275	3.93268	11.0726	10.1745	9.36442	7.21044	8.34466	10.6959	11.7102	11.3601	10.9555
ZNF831	4.13368	4.2326	4.05062	4.5124	4.58847	4.168	4.13485	4.25742	3.85404	4.24053	4.2499	4.03203	4.10673	4.5054	4.093	4.06925	3.7283	4.20859	6.31088	4.16578	4.19842	4.37606	3.97033	4.46838	4.03854	4.58092	4.4685	4.13239	4.2283	4.10337	4.61372	3.9771	4.28431	4.11812	4.29523	4.1815	4.20912	4.24372	3.99018	4.26687	4.02821	4.01254	4.2932	4.76639	4.0579	3.9352	4.03221	6.58322	4.14653
COL4A6	4.91024	5.08387	4.98988	5.32275	5.18769	4.96075	5.20045	5.07862	5.73984	5.11923	5.1339	4.892	5.09964	5.08854	4.9943	6.12344	5.48411	5.22074	4.90422	5.14782	5.49113	5.05819	5.0956	4.69236	4.9685	5.32852	7.66109	4.38229	5.12332	4.86897	5.1488	4.72297	4.81083	5.0503	5.12528	4.99382	5.33598	6.54518	5.03038	4.94917	5.53657	5.04501	5.04916	5.29908	4.82699	5.94364	5.39497	5.00907	5.21693
COL5A1	9.22086	8.80132	8.03923	7.1008	7.97593	8.10908	9.24001	8.97747	8.65282	7.53132	8.14061	7.93007	9.13544	8.03012	9.34103	8.52451	10.0009	8.0875	8.7216	8.95966	8.30289	7.21279	8.36298	7.50234	8.18103	7.84071	8.96614	8.77141	8.57707	7.90522	8.92516	9.4471	9.33784	7.49145	7.54294	7.65026	8.20213	7.65034	9.19257	7.68224	10.039	9.02312	8.0885	8.68102	9.12275	7.27884	9.02281	8.72304	8.91057
COL5A2	10.1018	9.19266	9.20313	8.88083	8.94667	9.15806	10.0137	9.72134	9.75437	8.74431	9.20312	9.08004	9.97287	9.21893	10.0222	9.6246	10.7451	9.11606	9.71342	9.54005	9.16014	8.3468	9.45163	8.63984	9.46801	8.72287	9.88931	9.83817	9.57073	8.55727	10.1941	10.7169	10.3401	9.35681	8.68992	8.984	9.52062	9.20555	10.0942	8.77517	10.8317	9.89905	9.05778	9.66909	10.1344	8.94419	9.56241	9.74806	9.55263
COL6A3	12.0449	12.1609	12.5652	11.3863	12.0537	11.7482	12.555	12.294	12.5396	10.972	11.9327	11.9343	13.0739	12.0435	13.06	11.9522	12.8256	11.6224	12.3415	12.291	11.7982	10.9145	11.7824	11.395	12.1864	11.2115	13.1091	12.3539	12.2397	11.832	12.278	12.7289	12.8397	11.0448	11.6334	10.6336	12.2649	11.3535	12.8247	11.2153	13.056	12.6171	12.0878	12.3519	12.8785	10.8771	12.2603	12.2806	12.3041
XIRP2	3.95449	3.78504	3.69034	3.68897	3.57149	3.7841	3.93559	3.57745	4.71771	4.14773	3.72603	3.76875	3.58387	3.89307	3.55245	4.00623	3.51707	3.7583	3.83032	3.95554	3.84807	3.66596	3.78243	4.16067	3.57113	3.78787	3.77924	4.08159	3.78786	3.90738	3.84499	4.08	3.89043	3.94771	4.14808	3.98457	3.83587	3.83881	3.67988	3.83351	3.46563	3.61975	3.77924	3.67982	3.42861	4.54377	4.1977	3.8934	3.95514
COL8A2	7.45148	7.11228	7.19445	6.7438	7.05899	7.92578	6.93935	7.65432	7.31224	7.2102	7.30756	6.75323	7.02289	7.42602	7.69093	7.63523	7.00243	7.573	7.93821	6.91312	7.6473	7.44211	7.78132	8.00194	7.25906	7.20835	7.3489	7.06957	7.34558	8.09018	7.11896	6.82432	7.29594	7.25878	6.9985	6.94026	7.08754	7.07357	7.1126	9.26816	7.56116	7.76098	7.39608	7.85967	7.13071	7.06679	7.02904	7.9454	6.90144
C2orf73	4.7606	4.91794	4.86345	4.48701	4.7607	4.89472	5.22559	4.59622	4.86142	5.29471	4.87654	4.8362	4.68484	5.0539	5.08968	5.27466	5.117	4.27659	6.33664	5.37659	5.20861	4.57167	5.05972	5.59378	4.75194	4.97808	5.20982	4.97769	5.28245	4.80151	5.45264	4.76735	4.51574	4.63449	4.75249	5.06232	4.7629	4.71007	4.62697	4.28138	5.76516	5.25935	4.91238	4.59564	4.76131	5.34091	6.0631	6.32352	5.44161
BBS5	4.26977	4.28454	4.47622	4.29587	4.50905	4.27122	4.28018	4.50447	4.44095	4.42995	4.15371	5.01669	4.10862	4.45245	4.64022	4.17411	4.37542	4.41391	4.76499	4.40501	4.37688	4.20086	4.33392	4.11915	4.28518	4.15031	4.50687	4.7941	4.14247	4.27482	4.45936	3.90135	4.3317	4.331	4.17951	3.94413	4.26491	4.22734	4.35211	4.55319	4.79651	4.15242	4.30118	4.3752	4.57645	4.57525	5.14554	4.84674	4.41564
COL9A3	5.91073	6.28604	5.97532	5.92802	5.70032	5.96549	6.17561	6.2968	6.11542	6.6935	5.27163	6.14295	6.12183	5.43259	6.10584	6.2754	6.03185	5.9502	6.31678	6.47423	6.0807	6.67527	6.23758	5.70372	5.89507	6.75505	7.60994	5.79886	6.72338	5.80855	6.14678	6.30776	5.90003	5.06746	6.83537	5.84818	5.98625	7.0212	5.3469	5.96293	6.16522	5.99916	5.80617	5.91064	6.31855	5.82466	6.09638	6.38295	6.55967
AADAC	8.95085	9.1866	8.47673	8.68027	8.43095	7.31383	8.89587	7.30607	9.1751	9.23457	7.6968	9.30189	10.2286	8.02357	8.56655	9.02231	8.96269	7.22582	9.2524	10.6606	9.08207	7.91648	6.66399	8.57254	8.39013	9.5566	11.6582	7.85972	8.69338	9.12143	8.73754	8.79816	7.30539	8.7281	10.7667	7.92818	10.5711	7.69477	7.45581	6.65345	8.48136	6.29321	9.19972	6.15841	5.69767	8.63665	8.73602	9.29018	10.8842
COL10A1	4.2034	3.90854	4.66813	4.1272	4.28947	4.24681	4.14307	4.29956	4.00402	4.35155	4.19524	4.0554	3.94202	4.33097	4.22508	4.04135	4.64719	3.98747	5.21741	4.07682	4.1938	4.069	3.92844	5.68468	3.8422	4.63755	4.22858	4.01662	4.4018	4.13904	4.49541	3.87221	4.67477	4.06874	3.94387	3.95672	3.94949	3.96032	3.98376	4.29604	5.19664	3.95746	4.00809	6.67597	4.10502	4.05087	4.22135	5.30318	4.11869
COL11A1	3.30218	3.92767	3.39615	3.38066	3.60759	3.65085	3.55668	3.38338	3.53574	3.30971	3.76716	3.29981	3.79215	3.79301	3.89644	3.37272	4.87883	3.64609	3.42896	3.98195	4.25174	3.54421	3.4908	3.38463	3.50923	4.18579	3.8847	4.19656	3.28081	3.23463	3.48254	3.51606	3.77592	3.60136	3.25735	3.50386	4.34273	3.60441	3.66177	3.66583	3.8977	3.39839	3.26357	3.68547	3.9917	3.39439	3.7906	3.51067	4.00389
CLHC1	5.77786	5.72657	6.19897	5.69959	5.28853	6.49202	6.25346	5.45502	6.3348	5.68037	5.77084	5.60043	5.36354	5.62135	5.49883	5.67013	5.82737	5.59824	6.20575	6.01614	6.13084	5.13538	5.30664	5.89338	5.69226	5.72912	6.09263	5.71209	6.46375	5.22939	6.02676	5.0768	5.52624	6.36181	5.41337	5.63721	5.76635	6.66987	5.73771	5.94943	6.14825	5.66578	6.12379	5.67158	6.02445	5.90415	6.3245	6.34314	6.02362
PLEKHH2	7.33129	5.96415	7.06747	7.21054	6.94246	6.20194	6.49058	6.91553	7.66336	7.0513	6.87484	6.72105	7.01579	7.38509	6.47299	7.51849	6.61038	6.98374	6.09034	6.13282	7.33118	7.42936	6.38958	7.16983	7.09102	6.47976	7.35549	6.8438	7.57238	6.83771	6.99456	6.91918	6.62766	7.75855	7.57678	6.9962	7.16112	6.94114	7.15053	6.59381	6.98131	7.0253	6.93125	6.42701	6.66552	7.43608	6.62459	6.23955	6.36407
AP1S3	5.01697	5.01006	4.32881	5.14062	4.87603	4.29695	4.72374	4.91479	4.5825	4.79923	5.0605	5.72001	5.22111	4.60147	5.14125	4.59232	4.84466	5.31734	4.99933	4.60781	4.77311	4.73835	4.59854	4.49782	4.65123	4.9346	4.80983	4.56822	4.68234	5.0037	4.86698	5.14341	4.91777	4.65529	4.5521	4.83433	5.09232	5.2414	4.83628	4.08223	4.79593	4.20669	4.22893	5.2731	5.02024	5.00497	5.09249	5.00942	4.6045
SGPP2	7.54902	9.21849	7.49547	8.97197	7.78815	7.28154	7.50679	7.03621	6.82585	7.11507	8.03046	9.42797	8.11044	8.61783	8.0783	7.94901	7.86687	7.52304	8.07048	8.01391	6.99001	7.49759	7.11383	6.97687	8.22756	6.47256	8.02873	7.39921	7.11936	9.57397	8.12973	8.3791	7.93518	6.66298	8.20007	8.55637	7.85091	7.19954	7.39413	7.54818	7.8442	7.31365	7.75557	9.61601	8.54759	9.25306	6.90963	8.10948	8.10217
ACVR1C	4.34243	4.9562	6.37353	4.79141	4.73417	6.33472	4.89134	5.55812	5.73544	4.88676	4.90557	4.91817	4.66147	4.51719	4.68919	5.11351	4.99287	5.27394	4.77064	5.08786	5.10762	5.10721	5.06296	5.46506	5.31311	5.79772	4.91749	5.47126	5.48661	4.77549	4.81501	4.94909	5.33315	5.30407	5.22853	4.60983	5.54855	5.55307	5.72715	5.87383	4.59143	5.22776	5.18856	4.37153	5.71861	4.44964	5.62493	4.73931	5.17304
OSR1	7.37717	7.2928	7.6227	7.51041	8.24945	6.8427	7.13144	7.73874	7.33618	7.11439	7.49107	8.44547	8.03523	7.81783	7.10819	6.88278	7.15573	6.99079	6.79467	7.15494	6.88129	8.39476	6.75642	6.62126	7.35155	6.10763	7.65057	7.53353	7.0602	6.8253	7.83674	8.17163	8.45905	6.92791	7.23167	6.34581	6.86222	7.51562	7.9959	6.35512	7.54141	7.31387	7.36867	9.17279	8.18726	8.16115	7.38597	6.8491	7.22017
FLACC1	4.591	4.74578	4.4788	4.69065	4.80741	4.49752	5.21555	4.44615	4.51288	5.12343	5.02487	5.05169	4.58257	5.14457	4.73981	4.92071	4.46596	4.50209	5.78819	5.36554	5.30794	4.54545	4.62545	5.15236	4.42789	5.12181	4.69666	4.90556	5.08248	4.89782	5.39565	4.45935	4.57005	4.68783	4.5011	4.81789	4.63518	4.58614	4.91207	4.37269	5.42414	4.89415	4.92002	4.45641	4.83266	5.36691	5.82522	5.57138	5.36273
LYPD6B	5.07775	5.45023	5.06841	4.77112	5.02284	5.24957	5.59403	5.13895	5.07059	5.49463	5.56391	4.7816	5.45134	5.23789	5.27279	5.16288	5.20753	5.22139	5.59179	5.96139	6.07152	4.98127	4.90022	4.92548	5.15442	5.19343	6.21809	4.85574	5.26331	5.26355	5.10465	5.19242	4.88675	4.86533	5.22833	5.65983	5.19527	5.05163	4.97941	5.33715	5.76713	5.19547	5.26247	4.78529	5.21297	5.20331	5.554	5.55696	5.84978
COL15A1	9.65496	8.81999	9.2038	8.29927	8.88413	8.58167	9.84931	9.44053	8.18922	9.20195	8.49585	8.41737	9.77091	7.78317	10.109	8.99332	10.0446	7.74655	9.02796	9.41194	8.66318	8.64482	8.45385	8.03314	8.74102	7.88355	10.1065	8.94792	9.05625	9.53707	9.6368	9.93907	9.48929	6.80617	9.74079	7.33915	7.91863	7.85827	9.66965	7.37146	10.3931	9.48103	8.4602	9.92648	9.9053	7.41988	9.10285	9.02343	9.36817
TMEM178A	9.01511	7.69067	7.08416	7.75936	8.11232	8.14793	7.86022	9.46197	7.92235	7.82525	7.59987	7.33873	7.7688	9.39574	6.79824	8.39158	8.37563	8.60865	7.52525	7.85551	8.60243	8.70307	6.966	7.13457	7.46294	8.26739	8.12299	7.93227	7.14825	9.49149	8.25166	7.54007	6.93869	7.25444	8.5951	7.25208	7.69048	8.24122	7.73713	8.61818	8.27643	8.12531	7.98516	9.16178	6.82425	7.23736	8.93341	7.58994	7.91635
MDH1B	5.93156	6.33769	5.22827	5.40478	6.11482	5.37329	7.06111	5.68199	5.87479	7.95944	6.11306	6.25671	5.22383	6.75147	6.42623	6.35826	6.03787	5.09607	9.0182	7.40909	7.21694	5.10528	6.30782	7.75675	5.58564	7.34062	7.28084	5.88667	6.89949	6.08533	7.68783	6.48971	5.50518	5.22707	5.17619	5.99107	6.78589	5.69073	5.25983	4.94876	8.09245	7.13658	6.73624	5.34384	5.75746	7.45856	8.4722	8.93584	7.50502
TMEM182	4.41608	4.55648	4.49054	3.93498	4.06559	4.54469	4.4598	4.65729	4.66911	4.23524	4.24729	4.38302	4.20737	4.40885	4.5322	4.15695	4.48881	4.39707	4.83851	4.50853	4.44816	4.1811	4.37415	4.51613	4.40929	4.47447	5.45971	4.50545	4.48705	4.26018	4.46892	4.54161	4.49511	4.27827	4.15549	4.70382	4.36226	4.41458	4.58746	4.59949	4.34274	4.57894	4.65685	4.15719	4.42724	3.99733	4.53364	4.8399	4.42133
CCDC148	4.75678	4.36625	4.15822	4.40827	4.14329	4.17681	4.53083	4.29054	4.21761	5.11368	4.517	4.53854	4.11753	4.77525	4.35139	4.20177	4.37458	4.28547	5.75536	4.99111	4.74909	4.32925	4.4119	5.02477	4.27386	4.94668	4.81898	4.4191	4.52467	4.4181	5.06254	4.60541	4.42663	4.36632	4.07817	4.22021	4.59951	4.33648	3.8164	4.02997	5.1229	4.52394	4.59138	4.16776	4.20887	5.01373	5.86748	5.60984	5.06817
M1AP	4.11578	3.64858	4.05135	3.95915	3.96913	4.37452	3.69916	4.28067	3.93623	4.11698	4.15004	3.86949	3.93365	3.91623	3.99199	4.12462	4.09807	4.10388	4.59115	3.79158	4.51666	3.97682	4.26766	4.48629	4.06578	3.81928	3.76417	3.70259	3.96972	3.75102	4.12013	3.81024	3.94931	3.90938	3.95817	3.68167	4.29891	3.91649	4.35922	6.11163	4.05347	3.81704	3.78355	4.08847	3.78232	3.86744	4.01889	4.56571	3.70624
ADH7	4.20467	4.56889	4.47981	4.65947	4.27723	4.59242	4.44304	4.26041	4.44613	4.47794	4.33737	4.51457	4.45696	4.65903	4.64625	4.51896	4.7729	4.29284	4.21968	4.78313	4.31615	4.56852	4.5079	4.59479	4.58495	4.54646	6.22855	4.41344	4.86932	4.66511	4.53839	4.98938	4.59294	4.38005	4.5186	4.35602	4.59873	4.46637	4.44515	4.51039	4.62375	4.55699	4.47233	4.51821	4.41333	4.52828	4.43918	4.22383	4.8084
KCNH8	2.93759	2.8732	2.71888	2.93338	3.00934	2.88709	2.91965	2.83097	2.64111	2.957	2.84107	2.73109	2.94011	2.89662	2.85346	2.94714	2.69465	2.77773	2.90659	2.77273	2.97159	2.99411	2.90451	2.86575	2.76062	3.13603	3.40664	2.98746	2.76569	2.91729	2.66385	2.90868	2.72102	3.06995	3.15372	2.82264	2.97541	2.93803	2.69164	3.15005	2.90709	3.17307	3.12579	2.96915	2.9078	2.90448	2.90969	2.94046	2.89121
COMP	7.27342	5.95439	8.03433	6.0516	7.85474	7.03184	6.19056	7.42271	6.18832	6.47502	5.4359	6.35495	5.92727	7.1249	6.60814	6.15346	5.73035	6.00824	8.05367	6.65293	6.16745	6.41653	6.72435	6.30558	6.52047	6.04824	5.91732	5.68571	7.74651	6.7714	5.85422	6.1443	6.47107	6.28566	7.05681	5.09804	5.13593	5.7181	7.19116	6.94022	6.93547	7.42493	7.33875	7.69911	7.33412	6.87238	7.91923	8.00535	6.61024
FAM3D	7.22189	7.0088	6.42949	6.25249	6.50629	6.74017	6.76366	6.38641	6.63972	6.34914	6.80673	7.06145	6.87089	6.60436	8.08906	6.58695	6.95434	7.18889	6.53344	7.1857	6.87898	6.04874	7.48032	6.58553	6.71352	7.56181	8.06793	6.71474	6.54	6.7206	6.61937	6.39424	6.34719	6.24685	6.56514	7.60706	6.45799	6.47824	6.51541	6.53962	6.87253	6.33109	6.48214	6.5484	6.95908	6.40465	6.82607	6.54179	7.13455
LRRC15	5.7328	5.65595	5.26766	6.01213	5.60116	5.64568	5.49691	5.63115	5.2955	5.65669	5.6872	5.3735	6.09671	6.28176	5.87833	5.59225	5.51926	5.46561	5.33353	5.63791	5.88458	5.37019	5.58368	5.12884	5.36801	5.20381	5.84843	5.5812	5.24153	5.78608	5.73987	5.25697	5.81577	5.22674	5.15526	5.45461	5.31955	5.22357	5.49934	5.15634	5.80368	5.29907	5.21217	6.00308	5.39561	5.45936	5.4965	5.3823	5.49934
COL6A6	6.85971	5.22353	5.92147	7.08168	6.10776	6.9796	6.39315	6.94071	6.84259	6.45107	6.806	5.56237	6.34896	6.5027	6.79803	6.18892	7.258	6.60546	5.62021	5.9257	6.79381	5.94776	6.07306	6.32911	5.88767	6.15109	8.37629	6.0503	6.86451	6.36678	6.96457	4.83667	6.02762	6.64315	5.38812	6.5293	6.57784	6.48353	6.55923	7.68347	6.45909	6.50591	5.72587	8.02545	5.33954	5.69465	5.72202	5.67388	5.90432
SNTN	7.94125	8.28742	3.2032	4.62699	7.68072	5.44463	9.0118	6.83225	6.90463	10.5746	8.01173	8.00781	5.83565	8.91386	8.74548	8.19152	7.63718	5.10407	11.1216	9.91839	9.64193	5.11254	8.49395	9.6482	6.96118	9.72164	9.06011	8.12015	9.40176	8.37036	10.3797	8.4715	6.49607	6.72725	5.17697	7.47397	8.96077	7.0637	3.70273	2.85083	10.8258	9.12726	8.98394	5.9713	7.38427	9.93976	10.796	11.1056	9.86694
SYNPR	3.08857	3.65713	3.43845	3.40728	3.26043	3.33972	3.24115	3.34176	3.20413	3.32079	3.45653	3.06031	3.21066	3.25619	3.18099	3.26634	3.31343	3.22873	3.00628	3.4239	3.17534	3.21347	3.37647	3.29735	3.3355	3.22937	2.97058	3.31948	3.36158	3.36141	3.27455	3.38869	3.32126	3.22008	3.02135	3.04393	3.38553	3.1916	3.34698	3.07881	3.24815	3.29046	3.08211	3.19022	3.12036	3.19069	3.48428	2.97826	3.46388
PABPC4L	5.33659	5.09167	5.95975	4.71474	5.30606	5.15327	5.47074	5.55673	6.25674	5.56817	5.58047	4.7958	5.29079	4.98621	5.6246	5.41167	5.49011	5.49756	5.06064	5.87308	5.3397	5.56584	5.34837	5.21721	5.81371	5.281	6.74106	6.05809	5.59196	5.3327	5.3376	5.74441	6.07053	5.86304	5.32629	4.70131	5.40912	5.07754	5.45952	5.4894	5.51608	5.24344	5.76255	5.5761	5.52788	4.97539	6.18481	5.09872	5.86895
MAP3K8	8.46387	8.31056	8.54383	8.29282	8.29854	8.58755	8.34123	8.03338	8.27529	7.92192	7.73089	8.12393	7.51333	8.98704	7.81111	8.29311	8.52702	7.9927	7.95933	7.5712	7.72425	8.14536	7.86652	8.05683	8.35731	7.94289	7.62867	8.23421	7.96223	8.55289	8.09462	7.6953	7.66271	8.57898	8.68856	7.8261	7.66862	7.68738	8.15007	8.81629	8.60091	8.03064	8.13405	8.34534	8.41109	7.60939	8.19864	8.08841	7.67767
SPATA18	5.85449	6.23641	5.75406	5.42732	5.90785	5.77484	6.6428	5.38954	5.89557	7.34785	5.95069	5.84248	5.17563	6.50079	6.40516	5.95921	6.04238	4.98788	8.03258	7.30421	6.81478	5.32946	6.48115	7.18584	5.62052	6.61431	6.81508	5.91328	7.03246	6.01726	7.30622	6.37373	5.47951	5.40642	4.96787	6.19064	6.28977	5.74713	5.37676	5.48818	7.41188	6.6863	6.64949	5.85891	5.85368	7.04213	7.67292	7.96849	7.25643
SPATA4	6.12861	5.79559	5.92296	5.98852	6.03838	5.736	6.98364	5.98552	5.9033	7.61328	6.37676	6.15708	5.78509	6.62179	6.47296	6.34559	6.35141	5.94136	8.70043	7.97088	6.94575	5.64222	6.70092	7.72386	5.99029	7.4867	6.70075	6.06766	6.74895	6.23724	7.54038	6.03016	5.73372	5.93946	5.66415	6.39128	6.47589	6.15323	5.20033	5.948	7.61737	6.33752	6.3882	5.98746	6.05525	7.2323	8.2888	8.485	7.90423
PDCL2	2.72831	2.43197	2.51368	2.5763	2.56377	2.55186	2.43735	2.71657	2.49676	2.61472	2.47277	2.49066	2.74479	2.57842	2.66225	2.56703	2.52902	2.82565	2.6217	2.53104	2.30909	2.74766	2.44309	2.6557	2.54031	2.46042	2.6344	2.60423	2.55186	2.50331	2.5797	2.39503	2.31596	2.30406	2.41038	2.50996	2.50366	2.51068	2.66921	2.76002	2.53798	2.70861	2.4801	2.51611	2.33002	2.59051	2.51608	2.60121	2.54368
C4orf36	4.12666	4.18297	3.55032	3.42639	3.5855	3.80703	3.74094	4.21824	3.75248	3.87313	4.07676	4.15932	3.7472	3.7639	4.07807	3.99289	4.04198	3.88635	3.9185	3.50907	4.31044	3.76189	3.49401	3.47715	3.89025	3.45809	3.86632	3.99391	4.07386	4.0821	4.05152	3.693	3.44998	3.61531	3.79776	3.90604	4.6329	3.83311	4.22284	3.93357	3.79227	3.34108	3.88006	3.79338	3.79841	3.82611	3.99013	3.90059	3.54829
ADM	11.8016	11.6893	10.4584	12.3191	11.7747	10.582	10.6322	11.0606	11.3211	10.2839	11.6052	12.3144	11.885	12.3743	12.1887	10.7201	11.2719	10.9691	11.0368	10.5921	10.0258	11.1674	10.547	10.732	10.5559	10.2757	10.9688	11.45	10.8103	12.2831	11.8319	11.8044	11.3719	11.2397	11.4808	11.5766	11.115	10.6882	11.7715	9.63756	10.6152	10.7369	11.1769	12.9278	11.2459	11.9529	10.8185	11.1371	10.6813
TRAM1L1	7.19914	6.88472	6.89179	6.77178	7.17055	7.18356	7.69009	7.95035	7.6552	7.43922	7.36306	7.22914	7.18249	6.33904	7.38755	7.48634	7.22214	7.45506	7.01177	7.58433	7.16591	6.93569	7.18832	7.09406	7.47121	7.48073	7.98592	7.05808	7.02258	6.3729	7.52462	6.81058	7.63447	6.92763	6.61374	6.88447	7.51372	7.27637	7.17139	7.03524	7.35207	6.90106	7.10124	6.74959	7.06093	6.53233	7.4027	7.0592	7.56409
ENPP6	3.47643	3.01633	3.23023	3.23329	3.15098	3.00095	3.61486	4.03494	3.36312	3.15116	3.4741	3.07617	2.93503	3.20777	3.36941	3.67093	3.24465	3.09849	2.80355	3.05188	3.54821	3.40779	3.33036	3.32354	3.24546	2.90927	3.67438	2.85411	3.22829	3.49998	2.92652	2.9123	3.28783	3.46921	3.09796	3.09975	3.70204	3.05393	2.91603	3.31814	3.06885	3.17704	3.58515	3.25614	3.26967	3.31655	3.10217	2.71578	3.07271
SLC9B2	6.12204	6.2172	5.93788	6.05785	6.43339	5.94894	6.02715	5.82811	5.50874	5.9266	5.93521	5.80863	6.03636	6.46832	5.94389	5.86061	6.35832	6.09565	5.76543	6.17272	5.48276	6.13968	5.90807	5.59785	6.15767	5.85652	5.92399	6.09321	5.52009	6.3202	5.98664	5.79382	6.32808	5.89738	6.01601	5.99156	5.77495	5.54135	5.66734	5.27584	6.01282	6.03779	5.86251	6.68415	6.30414	6.2144	5.84894	5.83388	6.19047
PPARGC1B	7.98845	6.37856	6.46553	7.26691	7.34945	7.22331	7.29383	7.59566	7.11023	6.70051	7.22116	6.40426	7.02397	7.03752	7.54951	7.06314	7.09677	6.97606	5.87802	6.61457	7.74171	6.23644	7.00963	7.31427	7.11586	8.00735	6.15885	6.654	6.90438	7.71163	6.23622	6.23895	7.41442	6.89477	6.37688	6.24424	6.39008	7.07529	7.53554	6.60129	7.3543	7.91279	7.18953	7.58036	6.47001	7.12865	6.94942	6.21676	6.80751
EGFLAM	6.90517	6.93791	7.17495	6.92944	7.11717	7.1381	6.90604	7.15077	7.39015	6.71828	6.63106	6.76076	7.0533	6.98175	6.94445	7.21136	6.91517	6.69108	6.44098	6.72364	6.73481	6.94971	6.80335	6.29016	6.56082	6.54507	7.60664	6.56867	7.16411	7.17841	6.62237	6.58337	7.05551	6.60774	7.40155	6.11795	6.9314	6.49281	6.75252	6.6755	6.83071	6.88533	6.48694	7.5184	7.1745	6.23937	7.13705	6.47025	6.7467
CAPSL	7.22691	7.98792	4.49657	4.99432	7.08528	5.37153	8.7099	5.8844	6.83279	9.87444	7.6056	7.46039	5.49739	8.02197	7.87467	7.674	7.39807	4.89181	10.6817	9.87662	9.4851	5.47926	8.04123	9.19889	6.39624	9.19264	8.787	7.69971	8.87761	7.72826	9.69606	8.0982	6.12677	6.32062	5.07564	7.77186	8.4454	7.10308	4.35126	4.31678	9.91309	8.57229	8.53681	6.28809	7.17581	9.45212	10.6822	10.5797	9.81944
JMY	7.79435	7.46015	8.36651	7.92386	8.35058	7.83662	7.80141	7.70634	7.9386	7.70423	7.72419	6.90309	7.70096	7.46727	7.41174	7.97996	7.45339	7.56927	7.88692	7.35105	7.62605	7.9899	7.53733	7.93907	7.58607	8.18254	7.59061	7.82776	7.56256	6.60512	7.60533	7.47087	7.47816	8.06614	7.8492	7.41289	7.49698	7.55434	7.47868	8.03605	7.53255	7.60457	7.66982	7.01637	7.71428	7.33263	7.63559	7.92705	7.3167
ZNF474	4.33286	4.48683	4.34707	3.94731	4.2966	4.25476	4.68057	4.05277	4.03377	5.94446	4.39819	4.35493	3.85005	4.83647	4.49906	4.29554	4.33822	4.27638	5.91584	5.30038	5.08644	4.17916	4.43852	5.54984	4.30051	4.89675	4.52898	4.96613	5.2056	4.7034	5.25466	4.98794	3.94161	4.01442	4.27865	4.29757	4.60578	4.37166	4.1793	4.04096	5.3055	4.96516	4.6251	4.22736	4.09016	5.0428	6.40573	6.07731	5.38374
UBE2QL1	5.34208	4.67314	5.01485	5.0849	5.10049	5.09257	4.82277	4.84552	4.90296	5.13072	4.66077	4.79525	4.61927	5.43711	4.8015	5.10776	5.17605	4.80657	5.0009	4.72784	4.81921	4.75734	4.53056	4.71977	5.00916	4.48867	5.10108	4.95346	4.73997	4.58704	4.52582	4.43244	4.57866	4.91143	5.04421	4.49606	4.71793	4.76234	4.64319	4.96471	4.99853	4.98049	5.04022	4.77609	5.04955	4.65323	4.85691	5.05205	4.82713
C5orf49	6.2211	6.35296	5.9819	5.88721	6.4025	5.59008	6.71836	5.72693	5.41953	8.0959	6.27219	6.42528	5.65206	6.94285	6.56625	6.28811	6.32643	5.85279	8.64794	7.47889	6.89453	5.34074	6.42062	7.25309	5.62243	7.63192	6.6335	6.58789	6.93515	6.42043	7.66674	6.4848	5.31196	6.06147	5.59803	6.02754	6.83661	6.29607	5.40089	5.40329	7.38453	6.65151	6.71452	5.71004	5.95797	6.9533	8.47072	8.60948	7.44506
ZNF300P1	5.59866	5.60089	4.99	5.40297	5.95605	4.96268	5.8559	4.59231	6.16809	5.21615	5.62965	4.78342	5.88519	5.90436	5.45189	5.39805	4.79509	6.70004	5.51938	5.41226	5.53781	6.05172	5.80603	5.50063	5.70282	5.33459	6.33569	5.70575	5.19666	6.65634	5.51477	5.1342	6.10168	5.34914	5.07886	5.66971	6.07771	5.03038	5.0016	5.23916	5.18727	5.85073	4.87074	5.15929	5.3932	5.27757	6.30673	5.59493	5.39973
SOWAHA	3.60644	3.68489	3.49234	3.62236	3.76106	3.58564	4.10264	3.50934	3.62216	4.65122	4.04179	3.67857	3.24561	3.59157	4.02371	4.07095	3.85631	3.65432	4.47313	4.86878	3.97915	3.47569	3.97942	4.69044	3.62078	3.85163	3.59978	3.31419	3.9412	3.70515	3.92247	3.61304	3.4732	3.36979	3.48732	3.7031	3.90347	3.6792	3.50561	3.32124	5.2919	4.26525	3.85459	3.73349	3.54596	4.23484	5.15379	4.58672	4.79
IRAK1BP1	6.43505	6.54588	7.13258	6.14393	6.27786	6.89067	7.10237	7.10647	7.01818	7.15483	6.82571	6.8076	6.83071	6.04849	7.04568	6.90111	6.93006	6.44626	6.9491	7.11868	6.87336	6.96298	7.21681	6.93523	7.31997	7.33473	7.26534	6.8853	6.87108	6.09019	7.11571	6.74103	7.04366	7.24222	6.58435	6.89029	6.98339	7.24501	6.89711	6.60781	6.65849	6.86807	7.1736	5.79821	6.80676	6.67696	7.31733	6.95402	7.04077
CLVS2	3.04111	2.86533	2.96376	3.31854	3.27274	2.87525	2.90272	3.00357	2.90853	3.10127	3.06507	3.03352	3.14214	3.14847	3.07053	3.14868	3.08611	2.93843	2.65825	3.01985	2.92823	3.16931	2.98318	2.84351	2.98396	3.02939	2.93415	2.91389	2.83791	2.88096	2.73077	2.82497	2.88164	2.98597	3.06558	2.90637	3.17034	3.03631	2.89358	2.93088	2.82646	3.09044	3.01334	3.13374	3.22905	2.98905	2.7915	2.70946	3.05259
TAAR1	2.73853	2.9856	3.09262	2.83661	2.81337	2.83204	3.06064	2.61106	2.76593	2.98398	2.99175	2.82749	2.88544	2.95705	3.00939	2.88696	2.8449	2.79686	2.8151	2.81722	2.54486	2.85886	2.61994	2.94395	2.95843	2.84621	2.96859	2.89197	2.70376	2.88564	2.63491	2.80769	2.69384	2.77705	2.96043	2.84945	2.88857	3.13094	2.89475	2.81702	2.74999	2.86215	2.86845	3.00442	2.76411	2.87868	2.63942	2.90704	2.85553
PACRG	5.84146	5.903	5.54306	5.50317	5.77434	5.30243	6.35953	5.61304	5.59858	7.21581	6.15163	5.92731	5.37823	6.21827	6.18533	5.95189	5.74676	5.39634	7.65099	6.95352	6.54649	5.50577	6.14284	6.96634	5.49428	6.53661	6.26967	5.90965	6.39359	6.04634	6.93189	6.07485	5.31461	5.49659	5.38428	5.62628	5.96869	5.67035	5.10056	5.34682	7.31198	6.5111	6.18288	5.62399	5.67375	6.7002	7.98553	7.69514	6.97984
SDHAF4	6.46831	7.1586	7.60817	7.12509	6.21144	7.54049	7.30227	7.43993	7.24095	7.4965	6.98429	7.34593	6.51772	6.76314	7.5518	7.54742	7.34096	7.14677	6.93685	7.04555	7.02941	7.38625	7.4722	7.40603	7.59403	7.0363	7.42906	6.93778	7.13457	6.87212	7.18096	7.04466	7.05826	7.48945	6.42583	7.3378	7.41814	7.64494	7.01581	7.21452	7.25207	7.58441	7.09163	6.70534	7.04705	7.10342	7.29388	6.93689	7.09757
CD109	7.71022	6.89768	7.72575	7.97311	8.08931	7.4996	7.58627	7.77828	7.16244	7.35069	7.85538	8.10492	7.70487	7.61071	7.50944	7.25651	7.91843	7.86149	6.68687	7.36291	7.93503	7.62374	7.90667	6.58996	7.33833	7.9442	6.78548	6.7532	7.20009	6.95037	7.09955	6.5332	7.02776	7.72681	7.41503	7.9218	7.19259	7.64271	8.14136	7.33267	7.38052	8.09521	7.52748	7.44627	7.05129	7.79936	7.71454	6.67937	7.35562
C6orf141	4.11461	4.02582	4.8218	4.63159	4.50912	4.22555	4.6561	4.43126	4.24515	4.9789	4.24897	4.1859	4.33713	4.04906	4.13606	3.98752	4.01338	4.0861	4.83024	4.31465	4.35374	4.24766	4.02084	4.53644	4.1827	4.42413	4.71093	4.74611	4.5783	5.56187	4.07151	3.93404	4.49158	4.79073	5.08933	4.09452	4.15136	4.48129	3.88584	3.99274	4.41251	4.12809	4.52028	4.25132	4.46931	4.52815	4.97808	4.68494	4.37216
CP	4.73674	5.71468	6.64693	5.24353	5.72961	5.72691	6.47956	4.91373	5.16444	7.02744	5.65406	6.08309	5.23704	8.0369	6.29536	5.46281	6.34667	5.05871	8.19229	7.78881	6.6059	5.90639	5.73856	8.46002	5.67419	6.25158	9.34417	6.58759	7.2657	6.27406	6.68492	6.62499	5.51049	5.95788	5.15702	5.80944	5.52856	5.58875	4.83583	5.08631	7.33653	7.76307	7.72292	6.26448	6.02709	7.73063	7.63477	8.148	7.72751
MUCL3	6.38475	6.19591	6.91514	6.55902	6.70311	7.59122	6.89284	7.56054	6.44	6.90238	6.63495	6.61745	6.24109	6.03384	6.12675	6.38384	6.51429	7.17201	6.64979	5.75889	6.22844	7.07612	6.32094	7.201	7.18642	7.02653	5.61297	7.13889	6.06676	7.05284	6.91805	5.80004	6.6554	6.7145	6.07463	6.44332	5.44101	7.2815	7.24442	8.32934	6.69527	6.48563	6.95759	6.46394	6.71325	7.36596	6.51691	6.80002	5.99355
CPA3	11.3427	10.8647	11.4919	11.4322	11.9253	10.9892	11.3141	11.3675	12.1107	11.9986	11.7334	10.5316	11.7062	12.597	11.0829	11.483	11.4395	11.9515	11.5206	11.7231	12.4044	11.726	11.4452	11.2983	11.8787	9.92514	13.2138	12.4439	11.6584	11.7489	11.007	10.7601	11.3117	12.224	11.9865	10.6118	11.9392	11.9354	12.3705	11.96	11.8163	11.4562	12.2351	11.4847	12.2678	11.4959	11.9136	11.4785	11.6765
TMEM139	8.62376	8.53534	8.50901	8.77662	8.70216	8.60633	9.09167	8.64581	9.23658	8.59341	9.05571	9.04317	9.21205	7.23728	8.96699	8.5401	9.07434	8.56978	8.45646	8.95438	9.01729	8.83079	8.92645	9.1511	8.95548	9.22308	8.12416	8.91887	8.32543	7.53704	8.78733	8.28733	9.01951	8.67878	8.27705	8.78843	8.68668	9.05121	9.22709	8.60725	8.68826	7.47598	8.39537	7.57458	8.69213	8.50389	8.89987	8.45625	8.92427
OR6B1	3.26013	3.39475	3.78468	3.68382	3.45892	3.57302	3.59719	3.59151	3.29344	3.40446	3.57012	3.28124	3.67499	3.54886	3.32623	3.56592	3.56082	3.51548	3.43337	3.44835	3.39551	3.60461	3.50992	3.42198	3.44788	3.50452	3.26201	3.15195	3.32021	3.48435	3.2124	3.16505	3.29145	3.52064	3.58342	3.3196	3.53105	3.42923	3.17984	3.48396	3.0565	3.43046	3.56333	3.70045	3.46346	3.42818	3.37253	3.467	3.44296
ADORA2B	7.96018	8.72121	8.17717	8.19623	7.68488	7.92938	7.85276	8.09409	8.46702	7.90323	7.78231	9.18733	8.17788	8.56488	8.5412	7.77156	7.9066	7.84453	8.25906	8.2513	8.68255	7.95767	8.33616	8.58259	8.3284	7.50375	9.58238	8.19237	8.14198	8.80694	8.29928	8.55582	7.89007	7.73337	7.75244	8.71075	8.33836	8.138	8.85909	8.58444	8.12989	8.59241	8.40959	8.34749	8.171	9.31903	7.96673	8.2166	8.19891
CPB1	4.44585	4.24025	4.22411	4.04569	4.28442	4.00361	4.40947	4.45865	4.55723	4.19972	4.28091	4.31115	4.0593	4.49838	4.36196	4.29421	4.5064	4.08962	4.56784	4.21569	4.35627	4.15508	4.53453	4.20337	3.89834	4.30365	4.84818	4.43561	4.24965	3.95826	3.85764	4.39997	4.39328	4.31261	3.85014	4.13373	4.30845	4.11095	4.21247	4.63167	4.62286	4.45198	4.65528	4.38572	4.36703	4.17509	4.30717	4.48583	4.28127
CPB2	9.59997	10.214	11.0863	11.1975	11.069	10.8097	10.8361	10.8491	11.5685	12.0572	11.8594	10.5542	11.1318	9.67919	10.0561	10.7363	11.8535	11.1924	9.49806	10.7693	10.4816	11.7652	9.82567	8.43714	10.7462	11.7696	10.4267	11.1863	11.6309	10.9331	11.3959	8.79729	12.0045	12.2451	11.5142	11.532	12.5221	12.5991	10.3702	11.2823	11.3455	8.84155	9.12179	11.7545	10.131	11.9503	11.1188	9.42444	10.7146
C7orf57	3.92551	3.9351	2.56621	2.79892	4.01121	3.08316	5.2643	2.84929	3.55844	6.5633	4.21963	3.83017	2.8308	4.46823	4.52741	4.01975	3.80643	2.6623	6.81165	5.95472	5.19449	2.83575	4.23067	6.25674	3.58115	5.46712	4.49137	3.69046	4.94718	4.05219	6.18647	4.41958	3.52293	3.20553	2.89425	3.86782	4.98996	3.84646	2.39919	2.86631	6.31593	5.3853	4.98371	3.18767	3.71161	5.95204	6.53811	6.82732	5.94656
SVOPL	4.63121	3.8948	3.73071	4.36362	4.59731	4.15435	4.78599	4.14137	5.20641	4.57673	4.71518	4.04278	4.4411	4.49101	4.53776	4.54933	4.4122	4.61945	4.87612	4.35135	5.63908	4.35704	4.76043	4.3526	3.97044	4.75736	5.46851	4.12723	4.59565	4.89033	4.82018	3.86267	4.15945	5.07294	4.80779	4.31579	5.06042	4.68205	4.5737	5.19851	4.86843	3.89962	3.8188	4.17615	4.94938	4.22875	5.39469	4.83222	4.5122
LRGUK	4.77019	4.83406	4.77387	4.70271	4.68146	4.50004	5.1942	4.85728	4.42941	5.56604	4.54155	4.67916	4.40783	5.20637	4.83956	4.90006	4.90281	4.37533	6.80327	5.67839	5.1054	4.35488	4.89132	5.5927	4.69642	5.12424	4.62321	4.90566	5.09086	4.86498	5.53929	4.81157	4.82461	4.81083	4.45612	4.79586	5.08167	4.45747	4.46351	4.4268	5.61051	5.19123	4.80192	4.69447	4.55072	5.54957	5.67216	6.86657	5.70573
ASZ1	3.45759	2.57896	2.74973	2.88309	2.72135	2.53964	2.91981	4.45987	3.04666	2.67233	2.59271	2.94143	2.79374	3.12991	2.96549	2.9803	3.13283	3.44013	2.57058	2.61309	2.91792	2.92374	2.63907	2.46982	3.02175	2.78946	3.47463	2.80662	3.19234	2.86852	2.80703	3.20795	3.1315	2.79621	3.05343	2.53274	3.34198	2.58947	3.02488	2.84733	2.8787	3.56978	2.88885	3.41149	2.87567	3.21479	3.01851	2.54747	2.58819
CPN2	3.04349	3.07607	2.82013	2.89823	3.15683	2.81093	2.79723	2.86026	3.01881	2.96486	2.93461	2.72298	3.20982	2.79695	3.15545	2.99543	2.66886	3.02139	2.83432	2.93719	2.89631	3.25454	3.06941	2.95562	2.78766	2.91011	3.02853	3.12228	2.89149	3.21963	2.82566	2.46216	2.92071	2.64635	2.72908	2.61519	2.7991	2.98515	2.7907	2.94265	3.01026	2.92078	2.79618	2.98511	2.67606	2.92554	2.88666	2.80275	2.99084
CPOX	7.94157	8.14286	8.5111	7.89256	7.95179	8.29469	8.25933	8.46728	8.22922	8.15922	8.0328	7.96435	7.93962	7.49363	8.43182	8.14902	8.79541	8.13044	8.34286	8.2832	8.39005	8.09465	8.90272	8.75082	8.34218	8.15525	8.57375	8.1815	8.67627	7.55625	8.13085	8.69813	8.67099	8.55791	8.32948	8.79851	8.5147	8.47344	8.54156	8.49289	8.2599	8.814	8.28924	7.80027	8.26235	7.84399	7.99018	8.31967	8.23372
ZNF572	4.71627	4.65875	4.58223	4.91033	4.97093	4.6163	4.57499	4.91506	4.64952	4.64571	4.32696	4.72209	5.26186	4.41641	4.53348	4.92668	4.6571	4.90352	4.44186	4.79082	4.42919	4.95754	4.7444	4.4951	5.02797	4.44206	4.96417	4.71139	4.53355	4.23828	4.4795	5.18488	4.96521	4.59028	4.92569	4.7853	5.387	4.89127	4.95873	4.69923	4.70138	4.77802	4.64562	4.6559	4.38853	4.72729	5.01369	4.49549	4.87674
CPS1	5.17034	4.94401	4.7537	4.99732	4.98078	4.93507	5.03121	5.01742	5.96754	4.85286	4.76278	5.02911	5.15257	5.10391	4.9369	4.87088	6.34482	5.07012	4.91284	4.93305	4.92629	4.65838	5.39063	4.71869	5.07907	4.74117	6.07149	4.84992	5.51141	4.80689	5.10355	5.29499	5.39731	5.07966	4.64289	5.29434	5.66643	5.26962	5.24677	4.64598	5.44691	5.04874	4.83106	5.23091	5.02974	4.8684	5.06733	4.96233	4.95337
CR1	6.68696	7.19464	6.93734	7.21668	7.31825	6.90537	6.6814	6.639	6.92249	6.90104	6.80718	7.24163	5.72046	7.45883	6.49496	6.86421	7.27488	6.94028	6.30188	6.47796	6.96939	6.75689	6.70217	6.66517	7.04375	5.80837	6.72092	6.44406	6.77444	7.03777	7.20527	6.57135	6.28931	6.69619	7.14218	6.86166	6.65344	6.8602	6.12822	7.20398	6.5734	6.83482	7.06081	6.7538	6.462	6.70586	6.60905	6.39588	6.53353
TMEM71	8.21595	8.48736	6.7766	8.8115	8.71855	7.91463	7.11985	7.19128	8.03768	8.11874	7.69064	8.39187	6.53843	8.49094	6.44835	8.01259	8.39586	8.5207	7.31144	7.07298	8.07524	7.60796	7.22058	6.66997	7.83943	6.24386	7.05351	6.65943	6.92552	7.95279	8.30171	5.97673	6.89913	7.48839	8.31475	7.91001	8.17053	7.97613	7.03176	7.2029	7.38215	7.15492	7.36359	7.75938	6.86645	7.5358	7.60494	7.41779	7.10153
PXDNL	2.62064	2.46607	2.48106	2.50489	2.58547	2.62432	2.40916	2.64544	2.5957	2.51623	2.57983	2.67572	2.67324	2.47156	2.74571	2.94199	2.61484	2.67658	2.66437	2.70277	2.71735	2.91844	2.76184	2.60207	2.93315	2.64693	2.60474	2.61657	2.76244	2.58712	2.49161	2.42389	2.54413	2.63967	2.50548	2.51541	2.51772	2.6803	2.61818	2.69307	2.46414	2.41574	2.79581	2.58603	2.57002	2.55423	2.4882	2.66651	2.67571
LETM2	5.17981	4.7711	4.78529	5.03512	5.15425	5.29518	4.91275	5.33905	4.78752	4.96566	4.6525	4.70284	4.88427	5.14227	4.82648	4.7182	5.092	5.0934	4.89125	4.93171	5.06358	4.53189	4.91569	4.32586	4.92006	5.36712	4.49926	4.39736	4.96731	5.1463	4.84025	4.55103	4.40399	4.95308	4.76508	4.84167	4.65588	5.02144	4.6673	4.80188	4.62541	4.94386	4.63165	4.8967	4.78517	4.70065	4.73747	4.95236	4.90511
CR2	2.81746	3.08982	3.37728	3.10444	3.24715	3.27004	3.05559	3.2102	3.14682	3.33201	3.31597	3.08711	3.09868	3.33397	3.05064	3.11947	3.04508	3.21509	3.37834	3.01821	3.22983	3.09775	3.20767	3.06368	3.13425	3.05475	5.34854	3.02116	3.03332	3.16703	3.00552	2.89632	3.15553	2.98126	3.44608	2.95242	3.03992	3.04586	2.96593	3.69721	2.84076	3.11133	3.93411	3.49005	3.1186	2.96108	2.90674	3.40065	3.11703
CRABP1	4.94591	5.19409	4.76596	4.81823	4.94749	5.06784	4.96481	5.06785	4.77225	4.964	5.06776	4.7426	5.10303	4.86017	5.04712	4.99961	4.9721	5.0165	4.84484	4.95877	4.9039	4.65567	4.85097	4.81193	4.89303	4.87722	5.03573	4.9694	4.94519	5.04959	5.01698	5.08414	4.86305	4.93618	5.09498	4.81651	4.85473	5.06841	4.79496	4.99618	4.87421	4.64557	5.03198	4.87522	4.8442	4.87761	4.7405	4.85875	5.01448
C9orf116	6.81744	7.12527	6.16152	6.05061	6.71722	6.22528	7.82503	6.62561	6.55948	8.52022	7.05848	6.98176	6.20482	7.38312	7.33824	7.04491	6.99747	5.86436	9.20905	8.5075	8.14065	6.22377	7.10413	8.04379	6.26802	7.98143	7.56263	6.98624	7.8044	7.10307	8.45047	7.51644	6.50914	6.29512	6.0764	6.67292	7.44122	6.54096	6.19078	6.17521	9.03494	7.89824	7.79054	6.51898	6.97855	8.32523	9.30549	9.2235	8.43116
CRABP2	6.83018	6.44771	6.74953	6.4631	6.69323	6.91727	6.7666	6.73968	6.29427	6.22087	6.50592	6.3523	6.51119	6.76695	6.81772	6.59818	7.13958	6.42066	7.0444	6.4757	6.68837	6.42568	6.91494	6.47037	6.46952	6.56885	7.69956	6.5051	6.61326	8.23069	6.53614	6.74805	6.46348	6.44147	6.65327	6.18971	6.39314	6.44984	7.13787	6.64489	7.2377	6.72872	6.45909	6.46234	7.54076	6.43508	6.77193	7.08163	6.52148
C9orf57	2.96406	2.67012	3.07011	2.87609	2.97411	2.91411	2.74287	2.98538	2.78566	2.75959	2.89942	2.73688	2.82468	2.89449	2.86833	2.83194	2.80648	2.65052	2.77845	2.89203	2.87239	3.35443	3.0192	2.80986	2.73381	2.78015	2.94079	2.79693	3.14693	2.914	2.71695	2.75487	2.95641	2.89674	2.83348	2.80513	2.80294	3.10196	2.75157	2.91802	2.74997	2.6301	2.78088	2.65028	2.82101	2.89332	2.94825	2.83531	2.88563
CREM	9.76079	8.05717	7.95097	8.82003	8.7366	8.49985	7.91745	7.85661	8.39602	8.0651	7.85656	8.0751	8.32409	9.13691	8.33842	8.76854	8.13057	8.16153	8.91543	7.76927	8.34737	8.23315	7.35527	7.51983	7.96154	7.58397	7.42202	8.2617	8.17813	9.09287	8.16314	7.85489	7.67228	7.51869	8.52104	7.62007	8.04507	7.96132	7.91854	7.28885	8.38887	8.3856	8.03349	8.46367	8.4636	8.0923	7.66322	8.91614	7.89585
SLITRK4	3.99837	3.98906	4.00068	4.15693	4.16578	4.59308	4.02012	5.18313	4.26929	3.75841	4.06932	4.19233	4.0621	4.16668	4.10349	3.90841	4.02203	4.25168	4.01264	4.21442	4.01148	4.40775	4.26618	4.06653	4.16256	3.80224	4.09167	3.82529	4.07595	4.21739	4.06921	4.05545	4.2726	4.1181	4.31552	3.91509	4.13994	4.14889	4.39197	4.62114	4.04326	4.43589	3.95051	4.35155	4.2336	3.89968	3.94976	4.01631	4.22689
BEND2	3.23557	3.27686	3.38286	3.12239	3.45095	3.12742	3.32168	3.24495	3.37175	3.36132	3.10826	3.24055	3.41475	3.11631	3.19732	3.35338	3.07978	3.16609	3.03885	3.15089	3.20931	3.4887	3.38597	3.37986	3.20875	3.35555	3.01626	3.36205	3.19231	3.60328	3.23405	3.43881	3.19962	3.26322	3.26838	3.4648	2.99166	3.40008	3.10817	3.32458	3.03151	3.14322	3.41612	3.46396	3.05973	2.96456	3.53416	3.11674	3.20463
PWWP3B	5.11522	4.04105	5.31757	5.12152	5.4657	5.17965	6.03677	5.51747	6.00065	5.38761	5.49093	4.65836	4.32934	4.32188	5.02046	5.23917	5.37915	4.43526	6.12297	5.17382	4.41324	4.78135	5.37964	5.20679	4.60103	4.80263	6.17755	4.78326	4.34895	4.17394	4.91366	4.14539	4.57473	5.07073	5.00808	5.34471	5.34478	5.26191	5.72868	5.59478	5.471	4.7621	5.00791	4.65636	5.39849	4.78129	5.76547	5.99616	5.0072
CRHBP	5.01796	4.56352	4.24354	4.17445	4.64467	4.36083	4.08507	4.9546	4.79785	4.6711	4.52499	4.79007	4.3662	4.38659	4.28347	4.25886	4.65326	4.65126	4.03381	4.39743	5.49307	4.17045	4.11678	4.54636	4.36911	4.45138	4.09531	4.19998	4.95947	5.12695	4.49228	3.87728	4.87873	5.13553	4.69801	4.54248	4.78068	4.40053	4.92036	3.83184	4.1913	4.36963	4.70489	4.42976	4.52208	3.74698	3.85394	4.04387	4.38719
HDX	5.2249	4.78772	4.70772	4.95956	5.05693	4.68109	5.01589	4.98103	4.81127	4.88862	5.07929	5.41848	4.74435	4.92594	4.58423	4.08471	5.10032	4.86765	4.78895	4.74838	4.62056	5.0353	4.8633	4.4263	4.95651	4.76918	4.9467	4.51408	5.09823	5.58605	4.6228	4.92254	4.9971	5.00429	4.65514	5.62321	4.96651	4.44684	4.65819	4.44264	4.33621	5.00075	4.65202	5.84784	5.0556	5.13369	4.70414	4.81259	4.79123
ADGRG4	3.98062	3.49225	3.71644	4.24456	4.04981	3.87772	3.74038	3.93393	3.77375	3.94909	3.71086	3.78361	3.7703	3.90171	3.68304	3.81274	3.59698	4.15813	3.9703	3.3299	3.63848	3.88526	3.70091	3.56283	3.67723	3.8426	4.03924	3.47732	3.69992	3.70709	3.36406	3.56075	3.92363	3.64435	3.87006	3.36048	3.45307	3.97452	3.77034	3.70499	3.59526	3.35104	4.00599	4.08293	3.50183	3.95042	4.04584	3.96158	3.29699
PTCHD1	4.23081	3.77079	4.98364	4.48329	4.71366	5.58076	4.88004	4.84969	4.2708	5.2256	3.81439	3.84379	4.28649	4.44122	3.89471	4.09849	4.12823	4.2133	5.9311	3.97421	4.20505	4.82303	4.84837	5.67963	4.24721	4.38315	4.38673	4.54351	4.61227	4.51081	4.44713	3.87453	4.68347	5.21554	4.31629	4.56041	4.08248	4.49897	3.92261	5.81883	4.70694	4.12884	5.32498	4.46232	4.50234	3.94333	4.31939	6.13762	3.99572
MAGEE2	4.2152	4.17133	4.32522	4.20051	4.53605	4.69238	4.20713	3.9557	4.4169	4.3928	4.37287	4.11821	4.31869	4.58411	4.51086	4.45007	4.19705	4.28546	4.05046	4.16091	4.53241	4.41824	4.43976	4.27428	4.46812	3.82814	4.31524	3.90905	4.4218	4.11917	4.23976	4.22087	4.14231	4.5647	4.48852	4.18197	4.38404	4.08165	4.32903	4.39889	4.08941	4.45047	4.1229	4.05442	4.21877	3.95915	4.56819	4.12455	4.2035
FOXR2	2.83758	2.91021	2.90841	2.7694	2.79817	2.81985	2.76107	2.77612	2.74273	2.73399	2.8352	2.88391	3.05316	2.88962	2.89269	3.00414	2.77634	2.83503	2.75066	2.92195	2.81449	2.76739	2.84829	2.839	2.77771	2.90996	2.94387	3.13279	3.1479	2.9658	2.79133	2.80382	2.87841	2.9763	3.08974	2.76799	2.83587	2.68574	2.78957	3.11184	2.72616	2.82166	2.57794	2.7255	3.13094	2.89301	2.97964	2.83537	2.94746
SPIN4	9.65245	8.65071	8.82421	8.48785	8.5115	9.06647	8.53879	9.13227	8.96054	8.72355	8.92205	8.18687	8.42965	7.44111	9.36364	8.9998	9.05583	8.80541	7.26143	9.10645	9.30405	8.64903	9.31257	8.76417	9.19214	9.04155	7.84246	8.70448	8.51617	7.57186	8.42179	8.89351	8.60586	10.4953	8.27829	9.3467	9.23652	8.45818	9.0917	8.00276	8.35675	8.64558	8.81447	8.65604	8.49002	8.14498	8.34292	7.25702	9.05238
ADORA3	6.13235	6.8714	7.38191	7.09217	7.32466	7.65451	7.12982	7.74667	7.21826	7.69485	7.11274	7.28571	7.42509	6.09786	7.52711	7.64962	8.15498	7.39115	8.42593	7.74049	6.82187	7.14414	7.98102	8.39754	7.51478	6.69672	7.61293	7.17213	8.88953	5.67175	8.22974	7.46315	8.48664	7.64718	7.31267	8.4168	8.01529	8.01827	8.16856	8.32855	7.97352	7.62585	7.91082	7.30864	7.60943	6.88101	7.35322	8.21998	7.15049
ASB5	2.94013	2.62568	2.71098	2.61047	2.61698	2.56634	2.74576	2.82195	2.9708	2.8885	2.72766	2.62364	2.66075	2.87065	2.66686	2.93538	2.58394	2.99799	2.57306	2.80273	2.5188	2.90661	2.7569	2.54084	2.59907	2.77357	3.00564	2.71946	2.69447	2.68668	2.76145	2.917	2.64158	2.69528	2.71966	2.55402	2.70702	2.76682	2.58276	2.85969	2.96406	2.50154	2.8285	2.46838	2.70109	2.83996	2.47039	2.5628	2.82751
ASB9	7.08623	6.11521	6.41329	6.27981	6.36471	6.56936	6.39715	6.39563	6.80177	6.54368	6.47276	7.27328	6.45162	5.62888	7.25296	6.64569	6.80861	6.57676	5.97479	6.61184	6.73687	6.27305	6.7717	5.54249	6.73113	6.63532	6.5498	6.43853	6.20989	6.7185	6.38519	6.55746	6.41412	6.52996	6.53015	6.20237	7.16262	6.87155	6.00905	5.95817	5.77073	6.51969	6.60361	6.60297	6.65487	6.14594	6.02913	5.98606	6.67858
CHODL	5.26094	4.91097	5.38696	5.60717	5.27676	5.39536	5.81018	5.51751	6.18432	5.28701	5.30663	5.34093	5.44762	5.81144	5.14682	5.5484	5.10191	5.19453	5.11546	5.1362	5.42451	5.58759	5.33894	5.23551	5.61395	5.42741	5.77104	4.85296	5.32111	5.56719	4.71816	4.77158	5.16137	4.98003	5.18505	4.66831	5.27708	4.83429	5.43243	5.30618	5.25131	5.35841	5.78906	5.43706	6.11467	5.37475	5.67004	5.10907	5.17209
TCEAL2	8.33979	8.06741	8.80506	8.04464	8.54888	7.71095	8.20086	8.03474	7.64876	8.01385	8.62872	8.21674	7.67432	7.39587	7.88394	8.23695	9.0754	8.50337	7.69707	8.51955	8.28802	8.65617	7.89485	8.03459	7.30504	8.49774	8.56665	7.6398	7.59192	7.56455	8.26932	7.57422	7.92763	8.65385	8.10379	9.3548	8.7816	8.72614	7.99253	7.25599	7.97763	7.92264	8.2952	8.58456	6.0185	8.93719	8.51532	7.80544	8.48573
GATA5	6.69749	5.03764	5.6391	5.29789	5.187	5.63424	5.3096	5.57297	5.49057	5.61799	5.31141	5.25996	4.66167	5.69953	5.2571	5.54121	5.795	5.06015	4.96085	5.18022	5.15963	5.80434	5.05248	5.39271	5.91058	5.08892	5.70628	5.67302	6.29449	4.98892	5.41618	5.71033	5.48894	5.6539	5.33129	5.31573	5.60752	5.39515	5.28462	5.22986	5.69405	6.17869	5.16038	5.66055	5.3684	5.53607	5.40884	5.13077	5.18806
CTCFL	3.13345	2.91029	3.0644	3.29248	3.13794	3.07866	3.04693	3.0224	3.40563	3.14171	3.39978	2.92631	2.99653	3.16555	3.32934	3.17535	2.99185	3.2835	2.92328	3.29442	3.13222	3.18105	3.10931	3.98421	3.40576	2.9898	3.46221	3.27308	3.12835	3.11249	3.03526	2.84708	3.15955	3.22149	3.24219	3.00803	3.02221	3.12344	3.35427	3.1099	2.90818	3.12552	3.33598	3.0721	2.84522	3.15934	2.93371	3.01082	3.31309
CRY1	10.1587	10.12	9.81306	10.8972	10.8226	8.83117	9.66164	9.46975	9.10976	9.36776	10.2404	10.5537	10.1548	10.5259	9.88428	10.0491	9.73976	9.81804	10.0418	9.72488	9.52406	10.2624	9.64076	9.67551	9.85602	9.9315	9.02244	9.65178	9.3851	10.08	10.5364	10.3419	9.42305	9.66643	9.98104	10.2974	9.60372	10.0876	9.30569	8.95681	9.76829	9.20825	9.60466	10.7581	10.1035	10.6827	9.82935	10.1076	9.78546
MACROD2	8.26419	9.04123	10.2428	7.96273	9.47791	8.71831	9.12605	8.93078	8.89983	8.69927	8.99308	9.66938	9.05991	9.33544	9.31224	9.07075	8.72314	9.607	9.15838	9.94959	7.33092	9.23535	9.56092	9.24227	10.1559	9.26453	10.0886	9.54981	8.64189	7.92858	8.49773	9.68288	9.2939	8.08598	9.5045	8.74028	9.01795	8.55692	10.1347	9.7346	8.87643	9.25122	9.81369	9.02471	9.81711	8.77298	8.59336	8.96325	9.7084
SRXN1	9.64828	9.92315	8.76635	9.4555	9.95162	9.39374	9.35261	9.20368	9.18843	8.98315	9.16864	9.87562	9.56011	9.37758	9.05829	8.90789	8.89983	9.26881	9.35211	8.92696	8.97613	9.47578	8.98145	8.78353	9.32338	8.95553	8.42293	9.06342	9.14537	9.48184	9.59993	9.53456	9.35448	8.97577	9.44078	9.47888	9.11994	9.28635	9.44774	8.93293	9.65644	9.15928	9.11967	10.3613	9.69123	9.55798	9.16976	9.38458	8.92646
DEFB127	3.29776	3.21403	3.52673	3.52192	3.75425	3.44983	3.41922	3.38509	3.26831	3.74737	3.56128	3.1148	3.62409	3.66177	3.69735	3.4914	3.34989	3.59371	3.90729	3.39639	3.32844	3.29395	3.31671	3.33803	3.4243	3.85683	3.89793	3.29152	3.21766	3.32621	3.48342	3.2195	3.4452	3.40921	3.15079	3.57782	3.50935	3.42627	3.22103	3.56188	3.26828	3.22743	3.70844	3.4469	3.30947	3.66429	3.13541	3.92375	3.41829
ISM1	6.49939	5.73582	6.56367	5.69738	6.31844	6.83285	6.48735	6.52487	6.14387	6.17986	5.94384	5.39742	6.22564	5.74925	5.81615	6.27116	5.58934	5.68355	6.44449	6.13957	5.56765	6.62171	5.91824	5.80218	6.6272	5.74668	5.98805	6.52007	6.28542	5.97552	5.60549	5.2725	5.43216	5.99112	6.2265	5.81457	6.34402	5.55268	6.44211	6.45033	5.99388	6.31839	6.53671	6.04337	5.65094	6.24289	6.52241	6.52381	6.1847
WFDC6	4.28423	4.57296	3.79974	4.15485	4.10851	4.17094	4.37854	4.16202	4.0446	4.4277	4.37574	4.09781	4.25905	4.21417	4.08299	4.37272	3.81851	3.85477	4.79802	4.71556	5.08226	4.13002	4.20853	4.44941	4.2739	4.95976	4.21526	4.43965	4.31683	4.40823	4.4842	4.29168	4.06397	3.99224	4.18347	4.30766	4.59861	4.11227	4.18979	4.3899	5.28088	4.00802	4.06179	4.55672	4.13924	4.73474	5.10961	4.73966	4.69185
PABPC5	3.38339	2.92528	3.2876	2.98198	3.26773	2.78435	3.02275	3.85818	3.90807	3.4058	3.15594	2.69329	3.15385	2.80221	3.08027	3.10553	3.48806	3.15325	2.59219	3.1205	3.4234	3.09351	3.27125	3.18431	3.61166	2.82983	3.63202	3.08124	3.47843	2.74102	3.22195	3.02614	3.83493	3.527	3.05628	3.62075	4.00275	3.56196	3.28795	2.73512	3.03184	3.67529	3.65579	2.8962	3.16681	2.98662	3.49593	2.61264	3.19196
CRYBA1	2.99814	3.0349	3.03255	2.97581	2.95581	3.22129	2.91645	2.90613	3.20115	2.70171	3.13642	2.8744	3.11505	2.83378	2.99688	3.04528	2.93812	2.93474	3.09875	2.9556	2.68837	2.79825	3.11545	2.98364	2.93475	3.20855	2.65412	2.96075	2.80641	2.95814	2.95533	2.97337	2.98277	3.1256	3.07032	2.92273	2.72291	2.96209	3.1476	3.15429	2.81073	2.89607	2.77243	3.00249	2.91022	2.79354	3.08697	3.07054	2.95003
RAB40A	2.97703	3.16622	3.68199	3.61008	3.30878	3.40041	3.88156	3.86994	3.44162	3.2887	3.46827	3.38436	3.18599	3.16642	3.41094	3.60944	3.80071	3.86437	3.4017	3.40415	3.16705	3.32041	3.37022	3.75263	3.3442	3.20809	3.35619	3.42669	3.43447	3.23407	3.71643	3.3584	3.3657	3.44842	3.15271	3.42351	3.46895	3.71033	3.26372	3.74979	3.38627	3.33138	3.17819	3.35947	3.42037	3.29791	3.34611	3.41292	3.4558
CRYM	9.07448	7.03288	7.98968	8.38689	8.06043	8.63524	8.59503	10.0535	9.17895	9.06463	8.26185	8.43875	8.68411	7.29997	9.40093	8.86364	8.29938	8.04301	8.70234	7.66815	7.86512	7.836	8.37851	9.02075	7.49712	8.15483	9.81868	7.89324	8.88291	8.44006	9.11895	7.57981	8.28605	8.68128	8.38312	8.71439	9.39455	7.67494	8.71392	9.59631	9.25001	8.40923	7.90992	8.07428	8.12066	8.66438	8.73178	8.77711	7.61501
DYDC1	3.89928	3.62121	3.21148	3.60415	3.51252	3.47281	3.74077	3.50973	3.39897	4.22777	3.97519	3.78952	3.63413	4.61148	4.07053	3.71187	3.47478	3.30451	5.4896	3.97645	4.5366	3.07528	3.40039	5.28628	3.57625	3.75018	3.59524	4.09829	3.69364	4.04396	4.35027	3.63147	3.37194	3.38671	3.40189	3.57259	3.97042	3.68494	3.07641	3.37772	4.63232	3.359	3.72658	3.22542	3.71384	5.36766	4.29383	5.30824	4.08322
FGFBP3	6.66097	6.19697	6.0239	5.77163	6.30777	5.65096	6.05908	6.48212	6.11187	6.17078	5.95561	6.00944	6.3713	5.86717	6.3441	6.238	5.74888	6.56132	5.87584	5.86626	5.79333	5.46363	5.85052	4.97979	5.78154	5.52071	5.72086	5.86941	5.20322	5.73659	6.18006	5.97164	6.43802	5.73566	6.1986	5.15253	6.19416	5.90683	5.68688	5.9446	6.2347	5.57255	5.94726	6.01782	6.32793	6.02822	5.51454	5.97233	5.87405
LDLRAD3	7.55589	8.54783	8.4667	8.01951	7.81489	8.87513	8.12047	8.49422	7.88599	7.71199	7.92279	8.24929	8.55925	8.36555	8.50476	8.57206	7.95059	7.84725	8.34509	8.08424	7.55638	8.25377	8.50036	7.97643	8.08967	7.41908	8.13974	7.88887	7.89606	8.05565	7.83297	8.71221	8.54683	8.07002	7.78982	7.56847	8.11394	7.6255	8.55632	9.02884	8.35685	8.86282	8.62346	8.8661	8.99692	7.30842	8.08442	8.30254	8.06401
C11orf40	3.16297	3.24831	3.25166	3.08304	3.03515	2.98342	2.93929	3.09556	3.05305	2.82796	2.99113	3.17473	3.31801	3.01732	2.93829	3.05023	3.1125	2.82169	2.97481	3.18626	3.07421	2.94387	3.26164	3.1039	2.94715	3.3263	2.9517	3.15766	3.1688	3.44703	2.80373	3.34039	2.93718	3.02504	2.89143	3.37589	2.99776	2.98586	2.98093	2.83281	3.19613	2.84217	3.24932	3.27141	2.94083	3.05063	3.05139	2.98835	3.17548
OR51E1	3.95233	3.79895	3.71882	3.83526	4.19852	3.83811	3.63884	3.83372	3.7306	3.87987	4.0023	3.71742	3.90686	3.89257	4.0617	3.80936	4.08941	3.69616	3.44126	3.91724	3.85311	3.54321	3.8696	3.93181	3.76136	4.07251	3.94178	3.41843	3.51465	3.52699	3.43076	3.53268	3.72772	3.63872	3.86888	3.61375	3.49208	3.35607	3.56023	3.9018	3.47782	3.77517	3.58754	3.54349	3.90042	3.55674	3.86825	3.40123	3.94166
CSF1R	9.47913	8.93554	8.70222	9.04895	9.02127	9.77908	9.37253	9.12755	9.48873	9.41837	9.48757	8.91946	9.0465	9.45146	9.4852	9.66013	9.88907	9.80461	9.94588	9.19089	9.97684	9.2357	9.53266	9.90229	8.75865	8.94278	9.99694	8.77465	10.2991	9.71871	9.45924	8.65237	9.84085	9.30263	9.32461	9.41436	9.89397	9.84776	9.49866	10.4479	9.64489	8.97136	9.32696	9.31414	9.30441	9.06657	9.11329	9.91173	9.12472
MUC15	7.11391	6.49463	7.99424	8.21039	7.93729	7.88336	7.27384	7.48588	8.37218	8.91729	8.10094	8.24109	8.22148	6.96808	7.43864	7.70546	6.86367	7.27513	8.49118	8.19777	8.48688	8.9642	7.87749	8.66574	7.73587	8.791	8.18308	7.08091	7.57759	7.79979	8.56151	6.70831	7.66254	8.98304	8.3024	7.80867	9.08206	9.91983	7.99134	8.39494	8.46691	6.58176	7.00422	7.15208	6.86171	9.38066	8.74665	8.45761	8.15293
CSF2RA	7.32444	7.43088	6.80558	7.32	7.29693	7.61853	6.8936	7.32052	7.05548	7.01807	7.13857	7.06119	6.77837	7.24845	7.1021	7.51137	7.52829	7.61891	7.89948	6.59046	7.51523	7.04491	7.01143	6.81507	7.00467	6.44165	7.12808	6.8534	7.88298	7.32605	7.44609	6.6123	7.16047	7.0045	7.12412	7.14597	7.559	7.61018	7.23552	8.26095	7.64216	7.47556	7.20685	7.46386	7.0828	6.89169	7.12993	7.96666	6.61487
KBTBD3	6.30052	6.44041	7.51338	6.81625	6.49267	6.91233	7.19111	7.0493	7.11885	7.14723	6.656	6.72192	6.7101	6.11307	6.63161	6.82646	6.72407	6.76839	7.03546	6.87648	6.98062	7.22712	7.06181	7.2682	7.1274	7.22897	6.76586	6.8501	7.24127	6.20807	6.73219	6.54864	6.90568	7.43298	6.6279	7.02193	7.41823	7.75924	7.12266	7.0497	7.03422	7.138	6.80117	6.21483	7.13501	6.51977	7.23905	6.95313	6.97688
CSF2RB	10.3808	10.5797	9.51033	10.7694	10.6886	10.3072	9.40994	9.93069	10.2481	10.5137	10.2494	10.3944	9.51864	10.824	9.25254	10.0677	10.4278	10.7625	9.86705	9.3074	10.692	10.2766	9.70558	9.54479	10.3684	8.99413	9.27741	9.60484	9.89831	10.9487	10.2441	9.59146	9.60395	9.95407	10.9199	10.4187	10.4394	10.2394	9.62049	10.161	9.95463	10.1132	10.6557	10.2809	9.87299	9.86397	10.131	9.81896	9.27727
CSF3	8.16014	8.67843	7.9672	8.73755	8.08357	9.58219	7.86207	7.33031	6.40278	6.64327	6.62911	8.69085	6.40276	9.39577	7.31777	8.38944	9.68424	7.64153	8.05511	7.28347	7.83788	8.42181	8.08377	6.048	7.94783	7.97386	6.52564	6.64372	6.27104	10.9827	7.18944	6.15158	6.46268	6.76806	9.46549	6.68563	7.31666	7.02669	6.69861	7.33174	7.38456	7.91891	6.56743	9.12194	7.66928	6.47787	7.89156	8.07994	7.34475
CSF3R	8.86998	10.0158	9.32382	9.67432	9.64611	9.32124	9.65132	9.1918	9.72367	9.5684	9.37254	9.90375	8.6905	9.83345	8.87384	9.29024	9.70549	9.40001	8.47177	9.31797	9.18917	9.53151	9.24693	8.89297	9.6601	8.42195	8.45838	9.608	8.99335	9.24082	9.94729	9.49986	8.80102	9.08605	10.1185	9.71576	9.67916	9.70154	9.02379	9.62457	8.96384	9.20084	9.87778	9.01766	8.70381	9.18658	9.59258	8.59123	9.31894
OR10A5	3.86285	3.70864	4.12318	3.87368	3.35651	3.56098	3.98093	3.67599	3.70319	3.82487	3.38033	3.83133	3.79522	3.63601	3.67572	4.04098	4.09291	3.74074	3.77881	3.79868	3.3062	3.71805	3.42946	3.25046	3.4994	4.20985	3.54323	3.79104	3.34131	3.68961	3.51043	3.56908	3.71924	3.7216	3.72806	3.66411	3.39755	3.59996	3.6605	3.76951	3.47461	3.56947	3.57739	3.69674	3.65133	3.74556	3.76533	3.62659	3.88131
PRICKLE1	8.63952	7.97915	7.86255	7.59875	7.94064	7.78887	7.86147	8.39798	8.71804	8.00682	8.20155	7.50548	8.75985	7.68896	7.57621	8.66464	7.67905	8.4007	7.33623	7.73516	8.32319	8.45956	7.91814	8.05552	7.932	8.41512	7.76724	8.33964	7.79746	7.50795	7.66058	8.06324	8.29162	8.22592	7.99866	8.06743	8.17837	8.3856	8.26101	7.67565	8.06564	7.71334	8.0439	7.35735	7.59847	7.90379	7.95783	7.30014	7.59835
AMDHD1	5.67028	5.51313	5.4897	4.51794	5.58556	5.31365	5.43216	5.38937	6.07315	5.42418	5.12731	5.95775	4.55183	4.96289	5.07131	5.3447	5.55312	5.58308	6.18121	6.21911	5.44922	5.09512	6.15638	5.23613	5.76148	5.89268	5.14924	4.8081	5.94258	4.38579	4.89285	4.75233	4.49963	4.53117	5.63234	6.18626	5.34518	5.71746	6.00112	5.3449	5.91604	4.87511	5.24292	5.44176	6.27427	5.55615	4.93533	6.24918	6.22164
LINC00477	3.27144	3.48021	3.14487	3.38131	3.34984	3.02428	3.36216	3.39262	3.13979	3.17376	3.33653	3.01799	3.13427	3.41845	3.16882	3.26639	3.16117	3.46153	3.17598	3.04372	2.91908	3.12933	3.15989	3.32018	3.03527	3.18467	3.26328	2.93919	3.03465	3.04215	3.13467	3.26461	3.03029	3.36014	3.41026	3.09929	3.42268	3.17209	3.1721	3.52652	2.90648	3.09613	3.27656	3.13766	3.03179	3.29387	2.88624	3.16255	3.16235
GLT1D1	7.94688	8.7918	8.14362	9.00036	8.93852	8.41164	7.89325	8.04749	8.3823	8.39989	8.47382	8.72793	7.2543	8.65802	7.17667	7.98327	8.78638	8.48066	7.09605	7.72188	8.20778	8.37873	8.07069	7.27611	8.27756	6.63812	6.97984	7.56161	7.60316	8.28235	8.39911	7.73348	7.34268	8.14481	9.00821	8.33685	8.4414	8.43383	7.57412	7.71995	8.0339	8.1028	8.48198	8.12411	7.34527	8.0775	8.76267	7.20467	7.77629
E2F7	4.8171	4.61759	4.82071	4.81627	4.72222	4.92176	4.63912	4.74968	4.72027	4.69142	4.29279	4.47192	4.52227	4.7558	5.57225	4.86304	5.41538	4.54147	4.92543	4.55115	4.88044	4.43438	5.03703	4.54036	4.53222	4.58103	4.85959	4.3322	4.88815	4.74249	4.82094	4.90106	4.65735	4.31479	4.39098	4.55017	4.81259	5.03209	4.99738	4.71346	4.78587	4.71217	4.3586	4.71044	5.00735	4.71303	4.79356	4.85689	4.53014
KRT80	8.7259	7.93136	5.2957	7.54111	8.13191	7.86083	6.99235	7.18995	5.66097	7.08147	6.59338	7.94832	8.76961	7.01255	7.69269	6.8917	7.43427	8.21195	6.48837	7.03815	6.42335	7.02624	7.34925	6.92242	7.14351	7.06736	5.614	5.58718	7.76418	6.99628	7.09519	7.8633	8.44897	6.59257	6.26403	6.5657	6.59002	4.92712	7.74817	6.18077	7.48223	6.16041	6.25983	7.70764	8.64528	6.40877	6.93125	6.49383	7.03505
CFAP54	3.11956	3.11042	3.37577	3.13401	3.04386	3.0012	3.32097	3.26625	2.88135	3.37147	3.20281	3.44106	2.8318	3.35859	3.08906	3.26874	3.13305	2.96107	3.22433	3.34615	3.47849	3.01307	3.3308	3.07553	2.95202	3.16567	3.08823	3.37469	3.26625	2.80489	3.27653	3.24235	3.1818	3.09323	3.18474	3.20332	3.14354	3.25289	3.02503	2.78453	3.40358	3.1287	3.293	3.38407	3.05847	3.40019	3.78649	3.24014	3.38513
A2M-AS1	6.54159	6.23708	6.41897	6.06544	6.23157	6.08084	6.78556	7.06478	6.74989	6.45072	6.66027	6.61324	6.82625	6.38256	6.57404	6.75644	6.25131	5.95572	5.852	6.761	6.71916	6.8027	6.3661	6.28551	6.7575	7.11287	6.84568	6.27537	6.70177	6.26341	6.53263	6.43431	7.10186	6.43515	6.33968	6.00755	6.71251	6.79793	7.11773	6.69941	6.50702	6.74922	6.52257	6.50031	6.87957	6.33474	6.53529	5.84233	6.76254
CSN1S1	3.95622	3.98305	4.04453	4.1602	4.08447	3.83985	4.91153	3.92459	3.59401	3.94853	3.98474	3.83528	4.06935	4.34419	3.62826	3.95833	3.94458	3.82921	4.08653	3.9871	3.99206	4.12589	4.03613	3.84178	3.85822	4.19025	4.01657	3.75688	4.00536	4.01381	3.83244	3.91827	3.94311	3.80496	4.20505	3.97851	4.09672	3.76526	3.95862	3.83618	3.90875	3.93232	3.97732	3.74801	3.98838	3.73077	4.16211	4.13	4.03138
C12orf60	4.97261	5.02555	4.91429	5.09242	5.05212	5.08714	5.19981	5.60312	5.24162	5.15972	4.79523	5.58003	5.04706	4.62115	4.46185	5.06767	4.66859	4.90501	5.87579	5.462	5.10034	5.11822	5.68279	5.13555	5.04018	5.56399	5.4681	5.06846	5.36221	4.47156	5.21072	4.75053	5.18536	4.88339	4.93334	5.93466	4.98579	5.81274	5.18859	4.94862	5.28891	5.21132	5.41512	4.55215	5.16176	5.23647	5.52935	5.73565	5.35066
FAM216B	6.33147	7.09771	4.76895	5.24276	6.72033	5.12071	7.52626	4.9717	5.98755	9.12659	6.68271	6.65347	4.96008	6.64002	7.49378	6.06733	6.29634	4.71184	9.7284	9.06346	7.33511	4.96711	6.52504	8.52677	5.78259	8.42306	7.43106	7.08553	6.83015	6.71338	8.82925	6.24339	5.74884	5.39283	5.04594	6.82047	7.62798	5.87605	4.55847	4.08721	8.52061	7.18813	6.63097	5.61905	5.78788	8.34039	9.62124	9.60511	9.00425
PRIMA1	7.29701	6.22872	8.77339	7.03488	7.35392	6.41058	7.33444	8.91485	8.50928	8.08932	6.58753	7.27588	6.9337	7.76854	6.17121	7.87267	6.60075	6.73748	6.63392	7.4651	6.46674	7.35466	6.30613	7.70402	6.93007	6.67751	7.34411	7.54267	7.22475	6.18191	6.34913	6.30375	6.66037	6.98581	7.52463	6.21589	7.28726	7.09362	7.93162	6.89761	6.96398	7.15545	7.27429	6.33783	7.3511	7.47716	7.38789	6.68655	7.48278
PPP1R36	6.45888	5.95624	5.90619	5.95907	6.3371	5.6979	6.85913	6.9464	6.45106	7.62216	6.51642	6.66003	6.12019	6.27262	6.78754	6.43699	6.38886	6.06301	7.93797	7.04464	7.17732	5.91007	6.49619	6.86979	6.31416	7.21391	7.15364	6.0675	6.93596	5.89526	7.64597	6.26015	5.98803	6.0239	6.1032	6.25723	6.73656	6.25712	6.04956	5.37382	7.7883	6.94679	6.48137	6.13999	6.90413	7.54225	7.44582	7.99807	7.00851
SLC38A6	8.11299	8.44499	8.61188	8.02086	8.03747	9.08938	8.57664	7.87357	8.3824	7.80177	7.75911	7.95674	7.18443	8.33541	8.52458	8.08859	8.98126	8.17233	9.7991	8.27823	8.90134	7.6902	8.54451	9.14107	8.61393	8.04298	8.53596	8.48594	8.93401	8.53413	8.96045	8.59261	9.05014	7.9757	8.15657	9.02457	8.35834	8.28408	8.50802	9.56786	9.291	8.73387	8.42449	9.04458	8.64469	7.9504	8.23542	9.87473	8.24186
LOC145474	3.80357	3.73518	4.05057	3.7603	4.1365	3.95084	4.64362	3.95855	4.38844	3.81783	3.97586	3.49172	4.19777	4.28142	3.75439	3.51021	3.87294	3.86736	3.7799	3.70014	3.88501	3.92277	3.6795	3.44531	3.73439	4.60279	3.26472	3.6698	3.71302	3.8573	3.83898	3.51769	3.68431	3.7224	3.84199	3.4088	3.73732	3.48041	3.37502	3.791	3.69517	4.00937	4.21182	3.90892	4.04881	3.68443	3.84866	3.79525	3.62934
PTGR2	4.45849	5.01747	4.97981	4.43148	4.21079	4.68512	4.67603	4.06194	4.74212	4.29146	4.20276	4.92493	3.82913	4.30271	4.78029	4.24798	4.70756	4.37441	4.78045	4.46251	4.23869	4.20497	4.57343	5.01587	4.55347	3.8456	4.83963	4.52255	4.46824	3.45649	5.22157	4.71195	4.55285	4.3689	4.81225	5.75221	5.23377	4.69071	4.65471	4.2676	4.66247	4.42636	4.0542	4.43224	4.03826	4.42348	4.74443	4.92049	4.50218
LRFN5	5.60208	5.05201	4.97102	5.08471	5.11439	5.28155	5.36252	5.66104	6.09059	5.19016	5.65507	5.34459	5.51184	5.51	5.67318	5.13787	5.83206	5.44256	5.11511	5.19328	5.4514	4.63504	5.29747	4.91505	5.29475	5.43888	5.85884	5.10486	5.21048	5.64609	5.46938	5.80208	5.60952	5.05104	5.01747	4.8484	5.53558	5.37217	5.84552	5.08213	5.3462	6.13599	5.46068	5.63868	5.7051	4.65899	5.18068	4.91453	5.38638
TERB2	2.65358	2.32982	2.69361	2.67728	2.44961	2.47508	2.58932	2.5667	2.45809	2.86334	2.53405	2.60192	2.77955	2.59846	2.70262	2.42914	2.5265	2.68442	2.68575	2.65731	2.44647	2.60697	2.81517	2.66388	2.63806	2.49703	2.54778	2.52735	2.55394	2.8084	2.64635	2.64493	2.56032	2.48697	2.47744	2.57017	2.60784	2.56876	2.5862	2.70026	2.76723	2.81701	2.49945	3.16057	2.60431	2.67725	2.75468	2.73145	2.72142
C2CD4A	5.4555	4.93821	4.46273	5.47153	4.96534	5.15748	4.46434	3.90484	3.8428	4.01206	4.57349	4.69257	5.24141	5.78279	4.06509	4.50453	4.67631	4.16691	5.03094	3.69851	3.92246	5.48549	3.91398	3.8677	4.19841	4.11564	3.88079	3.85518	4.45483	7.76499	4.41815	4.47747	3.96577	3.74023	5.28167	4.52273	5.01433	3.39168	4.15221	4.21815	4.14285	4.03587	3.47592	6.43088	4.35525	4.34094	3.88568	5.16366	3.66391
C15orf65	6.6419	7.15622	6.61894	6.07367	6.61369	6.66963	7.69907	6.60436	7.06069	7.6903	6.70452	6.76251	6.43508	6.32402	6.65833	6.89374	6.9636	6.418	8.09247	7.71072	7.55273	6.47852	7.25842	7.74166	7.01255	7.51285	7.34858	7.15174	7.31302	6.23423	7.97635	7.09506	7.05661	6.78637	6.02182	7.40159	7.16278	7.17385	7.00721	6.75263	7.85763	7.32672	7.2005	5.91009	6.99531	7.42476	8.28922	8.09422	7.69488
LINC00924	5.07357	3.95163	6.00287	5.36787	5.91815	5.42109	5.63171	5.93929	5.21305	5.66801	4.21997	5.21457	5.03455	4.0579	4.44439	4.31528	6.29799	5.87127	3.78667	4.60855	4.89606	5.30208	4.045	4.8205	5.31145	6.23345	5.03207	5.38293	6.02633	5.40997	5.04784	4.24082	4.91837	4.88154	5.12771	4.91404	4.40547	4.83674	4.35118	5.21182	5.44976	6.72331	4.11138	6.09114	5.30968	4.85254	5.16683	3.8124	4.59039
DRAIC	4.52927	4.5805	4.26702	4.21195	4.26207	4.1765	4.46076	4.23265	4.25629	5.26632	4.47818	4.12221	4.26335	4.53704	4.5904	4.30333	4.51298	3.98439	4.95	4.95487	4.43391	4.20225	4.38432	5.04761	4.22215	4.67473	5.46359	4.18141	4.32094	4.49904	5.0425	4.19974	4.25317	4.40091	4.54068	4.24303	4.29524	4.2559	4.25004	4.40396	4.67604	4.40442	4.53176	4.51261	4.36516	4.56194	5.20938	5.27156	4.89989
NRG4	3.24376	3.19961	3.21425	3.19998	3.37178	3.28321	3.39445	3.37178	3.08537	3.09559	3.25525	3.08451	3.08034	3.41476	3.32154	3.17548	3.23336	3.18008	3.70207	3.50235	3.25145	3.17797	3.40684	3.12191	3.18313	3.08574	3.80395	2.8989	3.23484	3.27493	3.53707	3.23537	3.04687	3.16909	2.95735	3.12091	3.04183	2.97191	3.06255	3.29054	3.51946	3.21421	3.10229	3.19139	2.97162	3.32723	3.37292	3.80944	3.54829
VCAN	9.75908	10.2975	9.43497	9.62447	10.3378	9.67494	9.64883	9.42501	10.0778	9.59683	10.2363	10.4131	9.96352	9.98519	10.1168	9.82776	10.1676	9.96547	8.329	9.72955	9.72804	9.41693	9.46575	8.53972	9.65941	7.59816	8.936	9.14107	9.2072	10.2147	10.0543	10.3904	9.39036	8.88486	10.0947	9.82248	9.37797	8.61054	9.87784	9.96664	9.73149	10.1654	9.48961	9.94186	9.6619	8.55839	9.40601	8.33945	9.73243
CMTM2	8.61481	9.22781	9.1894	10.1556	9.70855	9.73179	8.09175	8.07364	9.05773	9.64134	9.30076	9.03932	6.93466	9.92746	7.58438	9.02821	9.97765	9.32281	7.94674	8.98939	9.25197	8.96161	8.94711	7.40632	8.93018	7.24086	7.89734	7.63931	8.6632	9.46878	8.47399	7.83974	8.25132	8.72309	10.0463	9.53565	9.30452	9.89731	7.8675	7.98958	8.87444	7.76735	9.20347	8.26023	7.82359	8.88701	9.38636	7.73255	8.96826
BEAN1	4.21036	4.10489	4.72	5.28103	4.75548	4.23159	4.04942	4.35867	4.16525	3.78903	5.019	4.79725	4.32575	4.50368	4.64462	4.55176	4.20768	4.81961	5.50194	3.89087	4.38272	4.53041	4.23691	4.3539	4.33773	4.46201	4.09369	3.92203	4.20091	4.48763	3.93359	4.01826	4.67911	3.76921	4.18938	4.07607	4.23993	4.34962	4.57077	4.39632	4.08491	4.22217	4.53578	5.5942	4.20912	4.27683	4.21085	5.57001	3.90474
CSPG4	7.68827	7.93424	6.77388	7.27951	7.68484	7.40619	7.74187	7.49253	7.31708	6.96739	7.54904	7.28254	7.80845	7.06554	6.98887	7.34807	7.901	7.51201	6.28485	8.10505	6.98976	7.62934	7.05303	6.61835	7.45164	7.77823	6.04424	7.31073	7.69604	6.91821	7.20061	7.72266	7.22445	7.40775	7.3454	7.62745	7.33855	7.18141	7.65576	6.6387	7.3167	8.06036	7.11177	7.37654	7.29483	7.59527	7.59349	6.25033	8.1766
ZNF597	6.7283	6.75459	6.42225	7.29362	7.0845	6.66845	6.58664	6.63191	6.69574	6.61949	7.25232	6.89004	7.00156	6.56639	6.53536	6.30616	6.73388	7.04596	6.70986	6.70997	6.91617	6.73098	6.57147	6.52269	6.63983	7.24985	5.82096	6.52485	6.17755	6.76368	6.75317	6.20073	6.47749	6.85585	6.03222	6.52534	6.59846	6.53732	6.93396	6.2736	6.40901	6.05187	6.62767	6.8194	6.73182	7.20293	6.73162	6.73396	6.65357
TMED6	5.75177	5.13616	6.20264	6.95551	6.00626	6.63085	6.54339	7.02164	7.17189	5.89367	6.87833	5.35661	5.47592	6.10787	8.01991	5.84812	6.9107	6.05951	6.61547	4.93138	6.21165	6.92991	5.97674	6.26693	5.35576	6.19428	4.50214	6.24517	7.20334	7.14674	5.87481	5.25835	5.36644	4.74812	7.94318	4.73986	6.66996	6.69894	5.41028	5.65394	6.48377	5.72544	6.62554	6.64414	6.4621	6.1554	6.70332	6.62775	4.98237
ZNF785	5.63229	5.77026	5.64664	5.20754	5.28555	5.70696	5.2549	5.43168	5.53874	5.62061	5.34626	5.54409	5.3231	5.25261	5.24382	5.40356	5.65187	5.72686	5.28929	5.10981	5.51429	5.95602	5.14611	5.88041	5.80478	5.61676	5.8659	5.36797	5.7255	5.02716	5.2436	5.89097	5.6289	5.89203	5.68298	6.16662	5.62542	5.78472	6.00147	5.23445	5.53022	5.74856	5.52338	5.42122	5.34491	5.45405	5.53418	5.29644	5.12183
CSRP2	9.82886	10.231	10.2264	10.2387	9.95411	9.5088	9.63556	10.1402	9.63703	9.77701	9.58061	9.99745	9.79135	11.2023	9.08925	9.91428	10.2188	9.93373	9.83558	10.2761	9.66478	9.77211	9.78761	9.40918	9.50552	10.1371	9.62472	10.0369	10.7397	11.0826	9.48537	9.3374	9.59269	10.5676	10.1096	10.6904	10.3193	10.6382	9.51976	8.72209	9.92674	10.3559	10.2107	10.936	9.97249	11.3977	9.96947	9.77169	10.1976
TCAM1P	3.25238	3.32061	2.97595	2.91246	3.16041	3.21706	3.15421	3.16608	2.94567	2.9234	3.04565	3.21193	3.10309	3.32857	3.20529	3.28217	3.70942	2.87137	3.36213	3.19585	3.16755	3.18383	3.12407	3.20496	2.9009	3.24573	3.14971	3.20846	2.90466	3.22582	3.07633	2.97762	3.29341	2.90872	3.11749	3.37441	3.35723	3.35959	3.65656	3.48626	3.10034	3.21651	2.97719	3.01207	3.16834	3.31675	2.89146	2.96198	3.10531
CFAP52	6.09395	6.5429	4.8757	5.08032	6.1032	5.13969	7.22205	5.07275	5.59951	7.97502	6.22281	5.94351	4.93716	6.79541	6.23884	6.13108	5.56883	4.99987	8.65295	8.03207	7.19517	5.0914	6.36943	7.92491	5.58761	7.69944	6.78812	6.40376	6.92174	6.06504	8.1215	6.40985	5.21304	5.26266	4.65798	6.08427	6.95433	5.44714	4.81391	4.64512	8.23834	7.01272	6.32313	5.60747	6.05705	7.28456	8.79172	8.85838	7.86512
SLFN13	4.80808	4.76344	4.73135	3.98993	4.66877	4.82077	5.37751	4.31631	4.64982	5.38837	4.85027	4.75216	4.03114	4.86795	4.92986	4.7834	5.12058	4.65504	6.28573	5.71126	5.65995	4.43723	4.48843	5.55003	4.77715	5.31989	5.45726	4.51639	4.98039	4.53839	6.52157	4.56094	4.44243	4.94554	4.75533	4.99191	5.00852	4.78361	4.83258	4.7847	6.32691	4.91731	4.48342	4.46295	4.91971	4.89839	5.71211	6.22493	5.70275
UNC45B	4.5769	4.42315	4.06707	4.01771	4.07266	4.12673	5.06063	4.28512	4.29325	4.54764	3.9153	4.2167	4.12754	4.2065	4.06248	4.0583	4.40964	4.40832	3.96075	4.6756	4.17008	4.46044	4.09967	4.32573	4.14129	4.57228	4.51087	4.02193	4.79145	4.2795	4.31487	4.26031	3.98307	4.71878	4.10446	4.2067	4.28601	4.80431	4.14398	4.13507	4.36753	4.84427	4.07347	4.30408	4.45594	4.47118	4.16346	4.02854	4.61027
KIF18B	6.75616	5.70757	6.36804	6.26307	6.07646	6.35908	5.89704	6.15734	6.04611	6.03656	5.75499	6.08314	6.07476	5.95885	7.21209	6.8244	7.79212	5.93489	5.93023	5.98303	6.90096	5.97143	6.72583	5.90845	5.96534	5.82129	6.72672	5.69905	6.07417	6.02311	6.43184	6.08581	5.98795	5.94708	6.06003	6.54962	6.84034	6.6273	7.01361	6.46742	6.92847	6.34833	5.84085	6.11538	6.9932	5.8731	5.71825	5.94509	6.0236
CST5	5.29099	4.88706	5.25032	5.8443	5.45521	5.77284	5.35472	5.55232	4.88706	5.2531	5.48195	5.04541	5.45308	4.96821	5.10412	6.11572	5.63184	5.1567	5.55243	5.19217	5.39207	5.64587	5.1814	5.39837	5.27437	5.67934	5.5221	5.35208	5.49185	5.08826	5.36162	4.80532	5.06105	5.29518	5.69905	5.04305	5.39708	5.4329	5.17022	5.45737	5.45653	4.98666	5.07127	5.45693	4.9875	5.75718	5.24606	5.55809	5.46507
CST6	9.59371	9.15054	7.55241	9.36384	9.24244	8.42184	8.93278	8.7662	8.89692	8.67729	9.45008	9.35698	9.17143	8.11075	9.20127	8.84782	8.71456	9.09286	8.69695	8.19648	9.06089	8.74139	9.01506	8.03002	8.60452	8.98438	7.06609	8.75244	8.71193	8.42342	9.01222	7.91453	9.32377	9.04131	8.37287	8.73214	8.74399	8.25298	8.60209	7.03397	9.4782	7.49387	8.48427	8.97656	9.03103	9.20021	9.3669	8.55763	8.38016
AQP4-AS1	3.20177	3.56129	3.49735	3.22008	3.22221	3.5144	3.8558	3.51318	3.31155	3.41811	3.68879	3.35917	3.17109	3.45405	3.33546	3.33288	3.52119	3.46079	3.35378	3.68242	3.32284	3.35726	3.31973	3.36731	3.23477	3.44011	3.92237	3.20287	3.11125	3.24487	3.60324	3.19917	3.48191	3.31722	3.0113	3.27696	3.6073	3.11899	3.62164	3.27639	3.52127	3.50394	3.44186	3.36931	3.34363	3.15569	4.17014	3.63339	3.91974
APCDD1	8.66213	8.72938	8.85504	8.75351	9.07792	8.58125	8.92515	9.38618	9.24295	8.72823	8.9836	8.23092	9.35126	8.57415	9.11928	9.09535	8.78224	8.31104	8.55062	9.01326	8.63699	8.6027	8.95856	7.89794	9.05069	8.2463	9.30994	8.71496	9.00249	7.65997	8.86286	8.26764	8.92294	8.88933	8.80566	8.68185	9.12695	8.95435	9.37469	8.60754	9.00848	9.37933	9.1002	8.21426	9.29856	8.68007	9.60328	8.62655	9.0394
VSIG10L	5.90467	6.24467	6.7674	6.38213	5.80743	6.88463	6.61288	6.28481	6.24816	5.82025	5.97338	6.01628	6.09141	6.22439	6.14718	6.19662	6.52872	6.18954	7.06194	6.36025	6.36171	6.13747	6.41259	6.79805	6.23374	5.88631	6.45803	5.91785	6.77322	6.30002	6.4514	5.95181	6.14919	6.02219	6.29549	6.07223	6.19535	6.2988	6.23905	7.24101	6.38104	6.85883	6.54425	6.40254	6.29635	5.94617	5.92345	7.07441	6.35658
SMIM17	4.67023	4.19138	4.43883	4.1031	4.08595	4.33158	4.41521	4.86502	4.99185	4.00594	4.65712	4.42887	4.36833	3.99433	4.55393	4.82429	3.88313	4.93322	3.51423	3.81307	4.18951	4.78902	3.87344	3.61175	4.84071	4.09511	4.28066	4.04795	4.01203	3.87503	4.48321	3.66082	4.46057	3.96051	3.96496	3.91172	4.59552	3.84709	4.76719	4.02011	4.15762	4.74968	4.00947	4.18294	4.42718	4.10394	4.09702	3.5189	3.74369
ZNF417	2.57849	2.97927	2.80411	2.52415	2.64347	2.75567	2.19937	2.62655	2.93464	2.43412	2.58886	2.58902	3.00525	2.41064	2.78455	2.72939	2.54162	2.66788	2.69339	2.77723	2.58553	2.91957	2.69222	2.68859	2.55399	2.68805	2.72191	2.68819	2.73093	2.60474	2.43233	2.62655	2.522	2.76696	2.63315	2.70039	2.93395	2.74198	2.57099	2.76986	2.58717	2.49883	2.70196	2.54705	2.64767	2.83802	2.79721	2.72669	2.68054
ZNF560	2.7484	2.60324	2.61026	2.95843	2.62161	2.70424	2.56024	2.67053	2.62175	2.60902	2.81472	2.40313	2.76065	2.64407	2.76903	2.581	2.54966	2.8459	2.56836	2.60539	2.47314	2.90229	2.55615	2.37697	2.84817	2.3593	2.61919	2.6777	2.65561	2.74468	2.55112	2.55987	2.37515	2.50857	2.4839	2.5506	2.57596	2.57963	2.65786	2.51645	2.69912	2.47814	2.64063	2.57267	2.56709	2.64472	2.53498	2.59705	2.60062
TMEM190	7.88873	8.66011	6.99015	7.02211	8.29027	7.43356	9.61792	7.43928	7.88682	9.82134	7.99683	7.11767	7.39338	8.66842	8.4153	8.92604	7.89943	7.01687	9.54862	10.4336	9.09884	6.95044	8.51472	9.24918	7.36295	8.51201	7.57162	8.14475	8.83608	7.37488	10.2354	9.07551	7.20184	7.65152	7.24749	7.88058	7.35457	7.13256	6.63104	6.8009	10.7563	8.56018	8.03778	7.43126	6.97478	9.14571	10.591	9.55851	10.3909
SPC24	5.48724	4.94715	5.29835	5.35881	5.44858	5.10001	5.36023	5.42904	5.40704	5.30962	4.77894	5.27409	5.55129	5.21465	5.87812	5.51161	6.08526	5.2578	5.30916	5.23761	5.62292	5.0331	5.89267	5.19384	5.27409	5.0718	5.99591	5.42414	5.31674	5.25119	5.65034	5.45711	5.38455	5.22998	5.51223	5.41726	5.62281	5.40809	5.64573	5.69708	6.00477	5.66434	5.11444	5.41191	5.84523	5.20102	5.21177	5.29764	5.23176
IGFL2	4.13817	4.23488	4.73524	4.38032	4.34836	4.23819	4.2454	4.12673	4.00112	4.26125	4.12932	4.07912	4.19987	4.2686	4.23955	4.09868	4.62175	4.41219	5.81475	4.15262	4.08492	3.96007	4.13279	4.6722	4.21191	4.33155	4.43337	4.21586	4.88678	4.24583	4.1543	4.15333	4.3843	3.91183	4.12463	4.17978	4.16555	4.17201	4.53199	4.3013	4.4509	4.157	4.29159	4.12555	4.33216	4.22794	4.07612	6.19946	4.29783
ZNF420	7.22106	7.52234	7.51555	7.56549	7.2779	7.24624	7.19442	7.57885	7.50621	7.47026	7.25355	7.06863	7.55811	6.8211	6.72994	7.2467	6.49097	7.11057	7.61064	7.09373	7.53835	7.51345	7.46871	7.80968	7.18894	7.63531	7.74059	7.77865	7.47191	6.86821	7.40693	7.559	7.79787	8.08858	7.50667	7.54881	7.47666	7.67905	7.60794	7.38088	7.1594	7.44425	7.55433	7.54445	6.91158	8.05356	7.97076	7.60457	7.07938
NLRP4	3.29704	3.48475	3.63107	3.43948	3.2188	3.15419	3.59259	3.41573	3.34893	3.21227	3.50307	3.68597	3.43061	3.57058	3.18033	3.27291	3.53174	3.53393	3.84684	3.45223	3.50986	3.26036	3.5167	3.42718	3.20261	3.48174	3.31035	3.58426	3.44223	3.49137	2.99033	3.7056	3.35749	3.01195	3.71482	3.42985	3.15556	3.43872	3.46315	3.5137	3.23096	3.25564	3.60496	3.24471	3.35883	3.66104	3.33765	3.88173	3.39781
CAPN12	7.00875	6.70853	8.25566	7.00877	6.92927	7.73333	6.76346	7.14837	7.64036	7.50478	6.75461	7.06472	7.24682	6.95719	6.62381	7.56161	6.80835	6.96813	7.46712	6.79699	5.81897	6.96258	7.21833	7.94263	7.27377	6.76652	7.02619	7.06158	7.32777	7.55409	7.32045	6.99612	7.0385	6.77626	7.62119	7.07139	7.12411	7.00558	6.90798	8.04954	6.40981	7.17744	7.00015	6.61288	6.44227	6.73277	6.48704	7.53683	6.89355
ADRA1A	5.23736	5.21163	4.95079	5.45518	5.71473	4.79661	5.48374	5.38011	5.35836	5.27126	5.14746	4.97122	5.45777	5.39679	5.00432	5.10305	5.10322	5.46054	4.63962	5.37445	4.87687	5.55483	5.29055	5.0872	5.55756	5.4732	5.19896	5.5212	5.61756	4.78073	4.82475	5.51415	5.26162	5.70203	5.5597	5.68512	5.29796	5.47001	5.36982	5.13434	5.19086	4.96727	5.39751	4.86646	5.01957	5.33131	5.84925	4.8517	5.48632
TICAM1	7.56974	7.57027	7.47304	7.92857	7.62764	7.54777	7.33371	7.2234	7.26811	6.8585	7.6268	7.65156	7.40752	7.82924	7.39967	7.00381	7.50101	7.34585	7.74589	7.0169	7.40284	7.24049	7.22771	7.2073	7.05551	7.6185	6.92094	7.13678	7.33008	8.22066	7.32063	7.24017	7.26212	7.53114	7.3915	7.44657	7.02762	7.17377	7.23454	7.3444	7.10917	7.26088	7.13526	7.74696	7.5913	7.757	7.39072	7.75008	7.06266
ZNF738	5.85074	5.97335	5.78405	5.77365	6.25795	5.53992	6.17122	5.61928	6.373	5.67034	5.8859	5.71117	6.55546	5.62476	6.35859	5.74086	5.82698	6.2207	5.42518	5.8313	5.91766	5.66621	6.04289	6.02054	5.92688	5.61065	6.29452	5.71398	5.71767	5.16698	6.15823	5.44611	5.99288	5.84363	5.64624	6.26954	6.07103	5.70449	6.77149	5.5189	5.70652	5.75243	6.05656	5.65219	5.83122	6.2333	6.00018	5.68974	5.87128
SAMD13	5.70592	5.54612	6.13218	6.17398	5.42588	6.47252	6.40991	6.7783	6.51939	6.64526	6.17688	5.41689	5.85111	5.47975	6.63184	6.86608	5.65166	6.42333	6.79308	5.99676	6.63636	6.4713	5.87048	6.6579	6.42242	6.86544	7.0387	6.25347	6.19429	5.42797	5.90606	5.91403	6.40633	7.26438	6.01157	6.02485	6.37361	7.13677	6.51729	6.9537	6.36909	6.06449	6.12821	5.56723	6.31444	5.67498	6.57395	6.82587	6.01594
CIART	6.63342	7.8945	8.61297	6.39908	6.69881	7.12262	6.78489	7.76355	7.39139	7.87058	8.00706	7.29742	6.70072	6.58823	7.78273	7.39216	6.21303	7.15491	6.7531	6.92769	6.01727	7.54738	6.91048	7.63476	7.63125	6.10927	7.25982	6.85836	6.91436	6.92157	7.09241	7.02642	7.23913	8.05007	8.64062	6.96295	8.33086	6.88558	7.58027	8.38754	7.38669	6.59057	6.69955	7.01931	6.82542	7.14804	6.23774	6.81096	6.9819
MFSD4A	6.77124	5.92667	5.98274	5.9105	6.08375	6.12973	5.97973	6.16442	6.2581	6.21944	5.92616	5.67357	6.19697	6.43199	6.47097	5.80561	6.07862	5.87755	6.17497	6.38639	6.29778	5.56173	5.96853	5.9994	5.9985	5.78152	6.06588	5.86493	6.35626	6.90879	5.41131	5.26314	6.03287	5.94805	5.42755	5.92914	5.64272	6.32047	6.72263	5.45698	6.33108	7.13816	6.13363	5.09889	5.80552	6.02091	6.67057	6.2231	6.33565
PM20D1	4.98261	4.15935	3.93712	4.58334	4.44727	4.48825	4.41008	4.29417	3.62114	4.24525	4.19013	4.22668	4.56633	4.58299	4.26016	4.32394	4.4483	4.48871	4.31722	4.38058	4.31665	4.69655	4.03623	4.04822	4.13112	4.23896	4.49747	3.91299	4.36925	4.24303	4.0441	3.89852	4.21651	4.5182	4.4517	4.25848	4.57154	4.80376	4.11701	4.42517	3.98151	4.45661	4.34484	4.40671	4.14521	4.32441	4.03954	4.3008	4.3864
GCSAML	3.93552	3.4169	3.69226	3.96223	4.32532	3.67716	3.91779	3.94271	4.299	3.64555	3.84772	3.73087	4.01795	4.20142	3.33066	3.64598	3.84936	4.72441	3.48383	3.52375	4.21161	4.08944	3.82662	3.64007	5.01404	3.68768	3.87348	4.5252	3.68093	4.3592	3.67273	3.82795	3.8868	4.11971	3.94686	3.42906	3.88412	4.17656	3.78665	4.36526	4.13522	4.01548	4.13229	3.6833	4.69075	3.82582	4.11672	3.37592	3.3807
GCSAML-AS1	3.21814	2.99753	2.96056	2.99607	2.84015	3.02234	3.12206	2.90161	2.93555	2.63392	3.05698	3.09014	2.91301	3.21887	3.2984	3.34212	3.05098	3.04655	3.35202	3.05917	3.10289	3.2331	2.85904	2.98892	3.02041	3.24008	3.38776	2.98413	2.75493	3.05585	2.82946	2.90817	3.2725	2.80372	2.64112	2.8103	2.98617	3.10889	3.03994	3.47828	3.23317	3.80756	2.82523	2.78124	3.00572	3.18714	3.00285	3.39756	3.05809
MGC27382	3.09178	2.9985	3.33323	2.86215	3.00306	3.17793	3.11381	2.82315	3.15637	2.78773	3.1169	3.24241	3.11141	3.05873	3.58291	3.24595	3.09558	3.03	3.05877	3.11665	3.17757	2.98584	3.04293	2.92151	3.35118	3.20232	3.00818	2.83334	3.10743	3.02171	3.04212	3.02787	3.21296	2.96326	2.93928	3.066	3.23444	3.23074	3.02497	3.20998	3.0852	3.1061	3.14019	3.51257	3.30279	2.9682	2.8075	3.09564	3.03247
CTH	8.65917	8.95208	8.11903	7.95244	8.93662	7.50763	8.22744	7.84645	7.77195	7.88148	7.56991	7.5853	7.83807	8.30547	7.35016	8.93805	7.65059	7.86147	7.35143	8.05577	7.64764	8.29865	7.15707	7.06526	8.53069	8.18179	7.21345	9.21773	7.6914	6.00018	7.33321	8.75864	7.42533	7.39686	7.66527	8.16391	8.14064	8.05105	8.85639	8.13701	7.90896	8.15148	8.22971	6.32452	8.4412	7.97651	8.05787	7.44829	8.09221
CTLA4	5.01662	4.99841	5.61669	5.24159	5.08902	5.11131	5.29129	5.12455	5.00122	5.31263	5.06537	5.08373	4.89248	5.7627	4.91374	5.10426	4.82176	4.99522	6.91017	5.19031	5.03226	5.22629	5.04292	5.63538	4.89733	5.51062	5.41644	5.31731	5.33944	5.01033	5.4661	5.10054	5.46139	5.30966	5.2394	4.97367	4.87775	4.90711	5.03671	5.71279	5.22716	4.97722	5.30145	5.42089	5.1819	4.8459	5.20519	6.95114	5.19661
PDIK1L	7.87171	7.73578	8.20144	7.41524	7.85774	7.40781	7.93933	7.67866	7.61598	7.59407	8.11434	7.76858	7.80677	7.51964	8.03154	8.13161	7.40056	8.08358	7.35085	7.86244	7.9167	8.06146	7.84892	8.09289	8.05967	7.16111	7.92704	7.78762	7.37121	7.102	7.93828	8.172	8.24081	7.43438	7.57459	7.89408	8.31861	8.05403	7.68087	8.13505	7.66524	7.50325	8.31968	7.53078	7.68514	7.43173	7.32958	7.44684	7.8662
BNIPL	5.44967	5.02055	6.15521	5.32317	5.51644	5.80374	5.60934	5.5026	5.87584	5.93146	5.45563	5.47729	5.56369	5.28274	5.25741	5.58348	5.68246	5.18038	5.68588	5.3311	5.93903	5.66683	6.07213	6.29196	5.95718	5.26721	6.03335	5.34898	5.95868	5.70182	5.61374	4.70437	5.22743	5.83589	6.13595	5.21813	5.21831	5.56023	5.00407	5.94199	5.62012	5.45064	5.51079	5.06195	5.03793	6.27933	5.80391	5.4738	5.24091
C1orf210	7.59367	8.16915	9.40797	8.10261	7.68636	8.4264	8.51843	8.26843	8.3709	8.56505	8.62914	8.51312	8.54144	8.16988	8.51332	8.73855	8.34809	8.38079	8.33773	8.93059	8.321	8.62294	8.44288	9.21335	8.82181	8.22863	8.14502	8.73862	8.74646	8.34617	8.56026	9.0193	8.20753	8.6089	8.62391	8.32541	8.48281	8.9356	8.85732	8.66062	7.9739	8.23621	8.69097	7.28516	8.16409	8.34835	8.64783	8.35612	8.87402
CCDC17	7.0044	6.84217	5.959	5.74499	6.98865	6.228	7.9635	6.4643	6.30655	8.87842	6.8775	6.98042	5.73675	7.57549	6.96612	6.86899	6.73892	5.66997	9.24096	8.9469	8.42694	6.24994	6.69582	8.16917	6.7601	7.54667	7.36381	6.89961	8.33395	7.38831	8.75308	7.02813	6.13243	6.55667	6.4984	6.83254	7.15923	6.59397	5.79751	6.30543	9.12647	7.4986	7.69053	6.15498	6.49639	8.1735	9.04533	9.23149	8.82685
LRRC71	5.35567	5.77735	4.93662	4.99107	5.23964	5.33878	6.21944	5.43264	5.22754	6.39073	5.53613	5.34513	5.27827	5.48704	5.37425	5.58946	5.61492	5.17963	6.8179	6.5918	6.14885	5.33359	5.41561	5.89351	5.33717	5.81386	5.66152	5.93103	5.7581	5.39462	6.13178	5.73676	5.28647	5.28059	5.38883	5.47219	5.71422	5.24393	5.32126	4.9831	6.29279	5.55912	5.71684	5.44327	5.25235	5.97045	6.97775	6.67194	6.43371
CHIAP2	3.78474	3.82598	4.77792	3.78121	3.93648	4.1548	3.7604	3.65656	4.09339	3.73578	4.63338	3.56836	5.72149	3.83104	3.64164	3.93852	3.71779	4.29938	3.70796	3.70747	3.91432	5.45832	3.55632	3.91502	3.89603	3.64362	3.6397	3.83297	3.63706	3.99172	4.38999	4.09455	3.53574	3.98166	8.14479	3.99689	5.11392	3.90711	5.26178	4.04138	3.77695	3.88873	4.42741	3.58511	3.9586	3.95035	3.72692	3.65726	3.74542
PYHIN1	5.15193	5.40881	5.11716	5.20391	5.19434	5.12208	5.00491	5.21786	4.93096	5.17467	5.04988	5.05985	4.77755	5.543	4.97141	4.77831	4.87854	5.59872	6.40225	4.87821	5.36135	5.36406	5.01438	5.26238	5.03058	5.48625	5.3388	4.88015	5.26285	4.91845	5.46985	4.56109	5.12438	5.00717	5.42685	5.29791	5.35773	5.22635	5.40403	5.11314	4.77913	5.22089	5.10295	5.40534	4.87683	4.85988	5.02959	6.46772	4.87967
WFDC5	4.21445	4.19867	5.31406	4.55678	5.0111	6.96938	4.12053	4.67537	4.55006	4.1665	4.21434	4.24471	4.62146	4.08877	4.20978	4.93281	4.76895	5.05813	4.86763	4.5868	4.39953	4.90352	4.23896	4.52499	4.2595	4.80781	5.32987	4.10236	4.74287	4.30538	4.50089	4.08362	4.14293	5.25204	4.3623	4.27022	4.72073	4.74792	4.3986	5.99924	4.39789	4.5609	4.41163	4.267	4.39864	5.06872	4.43247	4.81612	4.63495
LIPI	3.13686	2.74286	2.93188	2.94245	2.65509	2.85715	2.96483	2.99721	3.06521	2.80872	2.73083	2.77777	2.91902	2.7531	2.70565	2.74979	2.86711	3.10427	2.97398	3.17207	2.78485	3.15441	2.82778	2.80262	2.89321	2.73167	2.86921	2.77452	2.78829	2.56546	2.69485	2.80157	2.83655	2.75607	2.92757	2.74254	2.93734	2.85422	2.67447	2.76048	2.66667	3.11818	2.69266	2.81727	2.68435	2.83771	2.70523	2.79029	3.07708
ADRA2A	6.92185	5.84884	6.78685	6.13341	6.17516	6.70169	6.42459	7.05219	6.04724	7.2595	6.19156	5.82287	5.85987	7.48848	5.83606	6.69701	7.09537	6.18467	6.42119	6.56814	6.56499	6.28699	6.30126	7.46779	6.05335	5.94481	7.57944	6.77174	6.81833	7.03969	6.26691	6.563	5.93043	5.7971	6.46739	6.20828	6.66324	5.97446	6.38601	6.71096	7.42504	6.73723	6.66402	8.57837	7.33154	6.21207	7.03699	6.4604	6.61194
ABCC13	5.27724	5.54465	5.37983	4.62414	5.44782	5.47343	6.03569	5.77984	4.99704	5.48583	5.69164	5.89591	5.17281	5.11449	5.08159	5.64469	5.20033	5.67406	4.62272	4.43432	5.4984	6.09363	5.49872	5.20365	4.96407	5.55471	4.44888	5.00599	4.97867	4.74315	5.36144	5.72287	5.47025	5.92025	5.25238	5.25014	5.8209	6.02735	5.60324	4.71319	5.74628	5.46927	5.21711	4.97046	5.76876	5.56747	4.78498	4.96419	4.45816
LCA5L	5.3474	5.7969	5.48281	5.46221	5.71641	5.14725	5.88249	5.81357	5.79168	6.54329	5.95167	5.71892	5.58914	6.11511	5.41387	6.00679	5.4545	5.30109	7.15898	6.4194	5.79348	5.39916	5.87764	6.12641	5.62496	6.34837	5.91653	5.65421	5.69946	5.56226	6.76422	5.39868	5.46953	5.71362	5.15669	5.43515	6.00569	5.8154	5.24634	5.20178	6.69507	5.34176	6.01507	5.45049	5.34833	6.56573	6.71561	6.97794	6.42094
IGSF5	3.83221	3.74874	3.41446	3.38225	3.64696	3.8114	3.54568	3.72485	3.44011	3.53818	3.4897	3.57551	4.01635	3.81243	3.7355	3.42125	4.0261	3.40442	3.62744	3.80438	3.60649	3.16058	3.66488	3.44437	3.76691	3.86739	4.07781	3.84448	3.36512	3.70322	3.55102	3.50685	3.53145	3.36963	3.2935	3.5799	3.69517	3.56572	3.46662	3.60051	3.69032	3.58847	3.70947	3.65537	3.64824	3.75442	3.4601	3.66891	3.80147
CTNND2	4.51944	4.17623	4.18565	5.18689	4.56853	4.42242	4.54395	4.32508	5.37055	5.18554	5.04848	4.63904	5.27443	4.18204	4.40961	4.5165	4.8544	5.05075	5.62558	4.62088	4.81936	5.12232	4.6053	5.06201	4.61363	4.80685	4.44627	4.83092	4.0708	5.10851	4.45499	4.2133	4.51525	5.6662	4.80261	5.05488	4.95843	5.08684	3.85525	4.27966	4.70781	3.64395	4.20809	4.81096	4.02022	5.55517	4.88768	5.56528	4.91222
ZNF295-AS1	4.38798	4.13367	4.42299	4.40278	4.42507	4.56972	4.40811	4.0806	4.40706	4.25089	4.37148	4.21506	4.53241	4.77752	4.07014	4.39136	4.24798	4.02444	4.57294	4.56967	5.08446	4.35823	4.51246	4.41821	4.16005	4.98475	4.26347	3.85254	4.39466	4.25858	4.51511	3.92317	4.19113	4.05416	4.25036	4.17962	4.54776	4.22711	3.87616	4.15233	4.32436	4.48424	4.2468	4.5469	3.97659	5.93687	4.38538	4.61667	4.57335
UMODL1-AS1	5.07752	5.39908	5.42595	5.17916	4.62423	5.46402	4.69923	4.91263	4.54849	4.83521	4.61475	4.79902	4.90068	5.08124	4.95303	4.71188	5.16132	4.99674	4.96771	4.76751	4.78618	5.58288	4.73225	4.7754	5.05985	5.09016	4.74486	4.93998	4.8009	4.74066	4.98068	5.0745	4.71248	4.69772	4.92938	5.97746	4.81532	4.74899	4.64026	5.05975	4.65427	5.07729	4.88281	5.16697	4.72414	4.96388	5.7361	5.02846	4.79844
CKAP2L	6.05495	6.00739	6.12375	5.95098	6.11015	6.34282	5.85348	6.10461	5.9753	6.08506	5.84469	6.26545	6.12232	6.19581	7.09717	6.43407	7.59893	5.84436	6.00183	6.01075	6.90113	5.92267	6.86442	6.05822	6.09817	5.97684	6.43367	5.99847	5.83094	6.0872	6.16779	6.02469	5.93385	5.78373	6.11051	6.44532	7.00168	6.382	6.68763	6.26997	6.61705	6.18129	6.00086	5.88097	6.66476	5.75062	5.92816	6.05741	5.98202
LINC01102	2.99725	3.00379	3.04569	3.02506	3.12535	3.14196	2.97441	3.03168	2.84955	3.04832	2.94321	2.71458	3.32113	2.97766	2.99619	2.87175	2.95614	3.16416	2.79294	2.98092	2.93084	3.06492	3.0846	3.01204	2.8575	2.94653	2.90378	2.8889	3.12346	3.02763	2.76897	2.91722	2.85665	2.78199	2.91768	2.81838	3.13075	2.87904	2.81684	2.99615	3.02486	2.96607	2.81653	3.00697	3.00445	3.11034	3.00477	2.91891	3.07417
C2orf15	3.39104	3.51626	3.46404	3.37747	3.22421	3.33655	3.41836	3.50046	3.26087	3.52005	3.58964	3.67939	3.06343	3.20568	3.57313	3.49269	3.4564	3.72139	3.77954	3.74375	3.37321	3.39928	3.31781	3.77358	3.48869	3.37832	3.37077	3.48568	3.39928	3.13952	3.77771	3.56246	3.88993	3.46739	3.30222	3.29502	3.47698	3.50792	4.00101	3.47558	3.5681	3.4179	3.65591	3.42027	3.60311	3.59104	3.45559	3.80024	3.74091
SILC1	3.92947	3.85018	3.77108	4.457	3.81503	3.74333	3.6236	3.84713	3.98573	3.82639	3.86035	4.09934	4.15278	3.82161	3.64566	3.94545	3.94255	4.17966	3.67218	3.98898	4.09803	3.90801	3.90419	3.78675	3.5085	4.25255	3.52399	4.03894	3.70117	3.94051	3.75938	3.81412	3.51015	3.69114	4.07205	3.91782	3.83824	3.86444	3.86366	3.90568	3.84018	3.88563	3.75678	3.85733	3.71799	4.22545	3.7222	3.58104	3.9785
TTC30B	5.86955	6.10664	5.93724	5.57967	6.14217	6.03093	6.58087	6.08911	6.03624	6.8832	6.45369	6.19862	6.02654	5.47827	6.29681	6.12466	6.20918	6.19877	7.26398	7.28159	6.96887	6.11358	6.52253	6.92638	6.4441	6.56878	6.49502	6.30055	6.33971	5.62468	6.92407	6.0618	6.34282	5.89662	5.77725	6.41789	6.51833	6.63538	5.78434	5.69259	6.91348	6.55729	6.75274	5.13479	6.02395	6.77726	7.30598	7.25071	7.18795
LINC00309	2.96093	2.85367	3.18156	3.20127	2.96816	3.16519	3.12741	2.96922	2.97223	2.87486	2.89485	2.70418	3.25342	3.3796	3.00913	3.20018	3.00139	2.8549	3.00937	2.74036	3.05003	2.91295	2.93371	2.83807	2.72799	2.98786	2.79821	2.85044	2.83203	3.09202	2.80137	2.90402	2.85191	2.82323	2.97946	2.98065	2.86482	2.94617	2.70298	3.13805	2.80783	2.88714	2.9793	3.15875	3.18266	2.75257	3.24144	3.05841	2.76187
CTSG	8.36982	5.91925	7.48746	6.96471	6.13988	7.06899	6.62674	6.241	6.59384	6.93467	6.19782	5.70839	5.6894	6.49539	6.13635	6.4139	6.22595	6.26868	5.56197	5.89451	8.245	6.79297	6.30806	6.48788	6.15115	5.76892	6.7847	6.17122	6.70697	6.36171	6.52854	5.35358	5.73519	5.78741	7.17052	7.53295	5.68885	8.15629	6.24166	5.90347	6.0695	6.2295	7.47286	6.15285	6.60179	6.09802	5.55324	5.56547	5.88692
ZNF385B	9.14195	10.2544	11.5739	9.72537	10.2305	10.7125	10.2124	10.4654	10.3763	10.6396	10.2309	9.65437	9.95292	9.43426	10.4119	10.8245	10.0882	10.2505	10.1416	10.5093	9.88586	10.7165	10.4456	10.7863	10.3181	10.7558	9.44702	10.3789	9.95754	9.83524	10.2198	10.4623	10.3761	10.8247	10.9247	9.69925	10.4592	10.5607	10.2892	11.0883	9.64012	9.44814	10.5969	8.82368	10.0603	9.94694	10.0205	10.1492	10.5258
ERFE	5.91794	5.20246	5.43962	5.37323	5.13603	5.17996	5.47444	4.94199	5.29229	5.06506	5.19827	4.88461	5.02617	5.07839	6.19707	5.20394	5.5009	5.2423	4.62391	4.98037	5.11929	4.99073	5.1805	4.81925	5.25823	4.79567	5.05875	5.20656	4.60332	5.43661	4.9066	5.06331	5.10858	5.11105	5.11891	5.00571	5.07511	4.84682	5.26536	5.36021	5.27384	5.13845	4.93166	5.27277	5.26085	4.87744	4.783	4.69232	4.95031
PPP1R1C	5.54674	5.19936	6.36684	6.28012	5.71853	6.71524	5.89455	6.7168	5.62835	5.88011	5.98739	5.87798	6.12474	5.25029	5.81761	5.93631	5.44643	5.68831	5.40591	5.38043	5.48221	5.89582	6.05287	5.88721	6.42081	5.29867	6.38006	4.89772	5.17867	5.58615	6.01963	4.91592	5.94786	5.93043	5.76804	5.95611	6.4434	5.06438	6.66769	7.48959	5.65809	5.22971	5.28665	5.71499	6.392	5.12284	5.5926	5.54741	5.47276
SGO2	6.70631	5.92534	6.8344	6.28245	6.29035	6.62123	6.38142	6.47112	6.98759	6.66204	6.33615	6.16327	6.34556	6.34198	7.11072	6.41905	7.6239	6.33633	6.98662	6.53347	6.99455	6.40356	6.94908	6.85117	6.46355	6.76282	7.29702	6.41132	6.70234	6.21965	6.56547	6.44512	6.65925	6.71185	5.98495	7.12061	6.91819	6.77264	6.91875	6.5763	6.80664	6.92075	6.43585	5.89645	7.03953	6.51294	6.45443	7.03588	6.54436
SLC38A11	4.24883	4.23051	4.87836	4.64382	4.34257	4.0505	4.82396	4.6439	4.47499	3.99454	4.29295	4.1503	4.51537	4.47539	4.64737	4.22948	4.17054	4.05575	4.4762	4.36942	4.10218	4.87749	4.21091	4.58387	4.67965	4.28703	5.85053	4.58852	3.92835	3.95154	4.15765	3.79388	4.32345	4.29591	4.53799	4.03549	3.87651	4.22635	4.36029	4.22896	4.37663	4.01236	4.43294	4.82827	4.91346	4.29383	4.35115	4.43795	4.42427
CTSK	8.74886	7.35904	10.4454	8.86364	9.19827	9.51589	8.97039	9.29176	9.15883	8.65416	7.90221	9.08444	8.35623	8.77804	8.7913	8.72968	9.72005	8.13787	12.1888	8.14798	8.89454	9.46905	8.90866	9.8319	8.6776	9.49409	10.0403	8.69582	9.89249	10.3684	9.28325	8.80892	9.8247	8.29344	8.59552	7.78995	8.61149	9.0606	9.22016	10.2541	9.93481	9.51007	8.75618	11.6382	9.88318	8.81695	8.76049	12.2329	8.11551
LRATD1	6.48851	5.43879	5.19249	5.84113	6.41365	5.71941	5.60884	5.5685	6.20681	5.62242	6.08198	6.26655	6.39744	5.73828	6.89791	6.03491	5.31044	6.26246	5.44675	5.91618	5.778	5.67266	5.76273	6.21578	6.17463	5.66724	5.76902	5.73017	5.5325	5.9844	5.60708	5.56076	5.54566	6.97356	5.44393	5.10442	6.09165	5.36846	5.87252	5.16641	5.81247	5.6296	5.8166	6.06223	5.15665	6.11023	5.92647	5.55395	5.99984
SLC16A14	8.25791	7.76375	7.76791	6.6941	8.01048	7.63655	7.70014	7.86508	8.17089	7.31026	7.43132	7.66994	7.65628	6.774	7.30019	7.40709	7.21222	8.29821	6.73491	8.19662	8.06165	6.54224	8.05096	6.37351	7.89348	7.66017	7.19382	7.75438	6.95805	7.24348	7.26491	6.26374	7.26284	7.01682	7.21816	6.217	7.36078	6.94257	7.62037	6.80115	7.74236	7.92394	8.11737	7.60901	7.30531	7.05702	7.68261	6.76759	8.25893
TAFA4	3.08478	3.59799	3.67548	3.55706	3.37156	3.45313	3.30889	3.64287	3.43018	3.58476	3.25462	3.43017	3.30185	3.41158	3.15471	3.7675	3.33975	3.40974	2.84487	3.36187	3.36987	3.55424	3.33729	2.92985	3.60484	2.97539	3.42874	3.27931	3.31183	2.96595	3.23736	3.05653	3.10697	3.60194	3.52315	3.40814	3.82119	3.4401	3.75082	3.20264	2.97869	3.19663	3.56643	3.27349	3.54508	3.48084	3.19085	2.88595	3.38441
EFHB	4.78553	4.15712	3.015	3.55712	4.05086	3.46389	4.9698	4.31959	5.02445	6.85773	5.71174	5.25345	4.0121	5.59757	5.25871	5.18394	4.39924	4.67386	6.84087	6.09967	6.49849	4.47708	4.97534	6.6833	4.41729	5.96262	5.89113	4.39215	5.41921	5.24482	6.68768	4.84827	4.33168	5.15418	4.3299	5.29842	5.93649	4.04753	3.88148	4.10766	6.74374	5.67075	5.33163	5.27702	4.41258	6.6053	6.76468	6.46244	5.69625
WDR49	3.29124	3.36519	3.21121	3.5811	3.40013	3.19351	3.42422	3.27159	3.35922	3.79576	3.46606	3.4183	3.37536	3.71548	3.7874	3.3151	3.34356	3.15158	4.71659	3.86293	4.01368	3.72812	3.34093	4.20251	3.43604	4.00831	3.75265	3.20839	3.95194	3.77417	3.91594	3.21155	3.35946	3.67384	3.72407	3.32904	3.61716	3.57168	3.1833	3.06253	4.3472	3.75602	3.74751	3.34035	3.25146	4.09253	4.649	4.91297	4.20598
LRRC34	6.24708	5.92524	4.6762	5.3488	5.64452	5.41484	6.66041	6.94224	5.91292	7.26503	6.26827	6.12854	5.61816	6.43709	6.38598	6.02762	6.01952	5.4428	7.99125	6.86265	6.93831	4.81324	6.10484	6.90469	5.7334	6.68966	6.32539	5.90276	6.71475	5.82485	7.65584	6.03755	6.04758	5.46077	4.97479	5.64801	6.58504	6.0519	5.19089	4.95081	8.02062	7.10306	6.68358	5.80939	6.00231	7.1653	8.13263	7.90378	6.79878
CCDC80	7.47935	7.55466	7.83522	7.57336	7.37845	7.89899	8.39437	7.54265	7.19123	6.97594	7.56707	7.21206	8.28089	7.65426	8.23248	6.98805	8.77557	7.17184	7.99621	8.17264	7.45771	6.97736	7.99636	7.24961	8.35166	6.54089	9.27651	7.86443	8.0013	7.29999	8.17202	8.87022	8.41008	6.68557	6.84399	5.76862	7.23642	8.00058	8.24116	6.55977	9.62065	7.43221	7.13542	8.72643	9.57401	7.46058	7.96369	7.98814	8.09683
BTLA	4.87695	5.81825	5.79682	5.57375	5.94579	5.34626	5.37979	5.33786	5.13036	5.94973	4.8788	5.11449	5.1526	5.59851	5.07894	5.30201	5.04304	5.54446	5.99883	5.52656	5.34945	5.40332	5.02093	5.75254	5.25978	5.49127	6.29098	5.49973	5.36246	5.20088	5.17515	5.19296	5.96055	5.41403	5.59633	4.95423	5.20504	5.56574	5.5108	6.01651	5.19332	5.49597	5.83207	5.27623	5.95254	5.04161	5.43724	6.01559	5.58045
MB21D2	9.25376	8.14341	7.46405	8.60105	8.31516	8.22532	8.41424	8.04549	8.93914	8.03422	8.49587	8.52146	8.19023	8.72027	8.45276	7.82393	8.22727	8.79546	8.89314	8.24684	8.23273	8.22782	8.60052	8.20613	8.69498	8.3666	6.74217	7.8149	8.20957	9.50715	8.34722	7.90732	8.0059	8.62649	8.27944	8.06842	8.37044	8.42741	8.06201	8.2382	8.13875	7.85198	7.69432	8.51143	8.37259	8.24648	7.66483	8.92022	8.27344
ZCWPW2	4.1218	4.26921	4.40174	3.9663	3.84485	4.47517	4.11055	4.1243	4.5703	4.22577	4.21419	4.19435	4.17409	4.27047	3.96032	4.57522	4.11856	4.12585	4.44909	4.34832	4.18296	3.91205	4.23553	4.11621	4.44175	4.28516	4.47942	4.26932	4.30102	3.92707	4.16355	3.7863	4.24947	4.47793	4.03383	4.25978	4.30937	4.52383	4.17857	4.22167	4.25061	4.24543	4.39974	3.6472	4.56172	4.17311	4.48776	4.55773	4.37707
CTSW	7.59064	7.25939	7.00979	7.84921	6.77459	7.80298	7.07973	7.59248	7.49885	7.90679	8.27364	7.42526	7.15348	8.41362	7.65113	7.27461	7.08653	7.82578	8.64398	7.61179	8.32358	8.27309	8.09092	7.62637	7.28415	7.01482	8.30227	6.70981	7.40661	8.59711	7.17793	6.31825	5.50963	7.81274	8.10701	7.87697	7.97912	7.43277	8.30107	7.77171	7.25856	8.2239	7.81561	7.398	7.11605	7.637	7.68359	8.73759	7.62495
NEK10	5.10984	5.26873	4.79751	4.81294	4.78255	5.13095	5.63635	5.01118	4.92333	5.19628	5.03909	5.04926	4.65949	5.14024	5.1475	5.1923	5.11641	4.75151	6.50661	6.15073	5.76036	5.06578	5.44711	5.76875	4.75933	5.60997	5.69649	5.37401	5.55575	5.3541	5.77399	5.36235	5.18291	5.1447	5.18204	5.04849	5.54422	5.06321	4.83982	5.28175	5.84676	5.40943	5.27521	5.02288	5.09929	6.03323	6.13869	6.49965	6.17836
CNTN4	6.06743	6.52398	5.95464	5.59227	6.30478	5.96403	6.56716	5.67379	6.23506	6.0877	6.28954	5.90419	6.13265	5.60562	5.97171	5.91986	6.16258	6.21034	5.18145	6.05927	6.10477	5.97108	5.97455	6.10259	6.20532	5.77281	5.53098	6.28199	5.72404	5.84353	6.10899	6.14935	5.79173	5.80496	5.76062	5.73074	6.34855	5.89737	5.97511	5.31451	5.6234	5.76656	5.72573	6.33308	5.91632	5.75018	6.02945	5.32516	6.18022
CX3CR1	8.05286	8.29579	5.43853	7.38671	7.80248	6.52366	6.09949	7.22802	8.21023	7.3875	8.55632	7.81935	7.2579	7.24192	6.95333	7.21441	7.75721	8.73092	5.94821	6.92619	8.9514	8.14299	7.57418	5.90298	6.30917	5.89834	7.99857	6.80895	6.13526	7.30293	7.98632	5.41386	6.48155	6.66013	7.66058	8.31775	8.32216	7.51286	8.44562	6.18387	7.05953	7.2035	6.44334	6.5158	6.60105	7.12576	7.21538	6.12459	6.92825
IGSF11	4.16739	4.09263	3.90885	4.27321	4.42458	4.14909	4.18137	4.07892	4.13664	4.02274	4.40601	3.7937	4.56999	4.39476	4.09513	4.20641	4.0148	4.41751	4.14453	4.27868	3.88912	4.56139	3.92269	3.97871	4.26201	4.27988	4.2573	4.26622	3.89335	4.10153	4.07005	4.22925	3.87019	4.22031	4.21493	4.04768	4.34709	4.05805	3.95194	4.10741	4.38305	4.14184	3.81544	4.39553	3.8577	4.24148	4.56611	4.18018	4.36887
TEX55	3.16701	2.91899	3.37993	3.07412	3.20689	3.25983	3.13903	2.99349	3.1523	3.13576	3.19071	2.9016	2.94532	2.92505	2.90271	3.2279	3.2027	3.17039	3.04596	2.85594	2.90799	3.32967	3.05465	3.3053	3.30529	3.15617	2.95634	2.9464	3.1321	3.5843	2.91722	2.81784	3.03967	3.2161	2.9662	3.02278	3.25101	3.18017	3.01577	3.11537	3.03906	3.09373	3.00458	3.13289	3.09113	2.95825	2.87907	3.06933	2.86544
SHISA3	7.25624	6.29303	6.01566	6.43687	6.43206	6.32344	7.04005	6.61921	7.44245	6.4877	6.7253	5.63474	7.12462	6.49603	6.73706	5.96811	7.36916	6.56432	5.3537	6.61862	6.72996	6.31487	6.28722	6.15391	6.95709	6.60097	6.70686	6.47768	7.82042	6.02246	7.0238	7.58711	7.67669	6.74822	5.56368	6.54658	6.42592	6.11838	6.2925	6.3536	7.11122	6.36801	6.37543	6.57882	6.37382	6.46161	6.80983	5.30149	6.65186
MGAT4D	2.52391	2.68496	2.41448	2.50875	2.55973	2.56553	2.6146	2.71922	2.47841	2.54695	2.85015	2.53838	2.37541	2.45737	2.77522	2.59288	2.65678	2.69221	2.99229	2.65501	2.53438	2.6909	2.83289	2.50268	2.62494	2.75917	2.45366	2.56269	2.63505	2.66041	2.54459	2.39829	2.67422	2.43143	2.62145	2.55149	2.71289	2.5334	2.36044	2.39038	2.93066	2.41331	2.78636	2.87663	2.61038	2.56811	2.70871	2.59626	2.69207
FAM218A	3.7935	4.24372	3.52214	3.77325	3.83264	3.56329	4.05015	4.41053	4.11179	4.2494	4.08243	3.69601	4.0363	3.72154	3.93192	3.91836	3.54157	4.54984	3.74928	3.77953	3.93995	3.52668	3.97555	3.8195	4.05571	4.0816	3.75974	4.16063	3.37268	3.14085	4.22397	3.39183	4.06285	3.83117	3.64999	3.45585	3.83476	4.0542	4.04213	3.58479	4.19007	3.72374	3.97925	3.33902	3.49472	3.63144	3.76986	3.83807	3.66725
JAKMIP1	5.29172	5.80136	5.97518	5.60951	5.91633	5.56381	5.88321	5.8765	5.46825	5.57699	5.45113	5.3406	5.03925	6.009	5.57849	5.54338	5.15211	5.66235	7.35788	5.53406	5.87152	5.74872	5.53531	6.24792	5.77465	6.33275	5.76547	6.01815	6.15352	5.40419	5.94821	5.4135	6.20835	5.7066	5.8354	5.89824	5.76979	5.66484	5.59823	6.10995	5.69235	5.96065	5.61121	5.50118	5.97008	5.50339	5.304	7.19602	5.59435
ODAPH	2.9115	2.90168	3.13774	3.03895	2.97656	2.96257	2.76601	2.84396	2.90068	2.85629	3.04479	2.74571	3.2067	2.77687	2.89125	3.09742	2.97671	3.00237	2.69386	3.02519	2.71701	2.72659	2.98099	3.05188	2.88486	2.9468	3.07082	3.01389	2.93766	3.16814	2.86066	2.73462	2.80328	3.11738	3.05531	2.8221	2.70703	3.16778	2.97572	3.10094	2.83443	2.78436	3.20736	3.02158	2.8712	2.98909	2.6406	2.69308	3.02571
KLB	7.06866	5.61724	8.398	6.79763	7.29878	8.63201	7.37734	7.71236	6.43496	7.69653	6.10799	5.88548	6.5773	5.09775	5.25362	6.09417	5.83163	7.39087	9.10455	5.59616	6.00688	7.00972	5.72328	7.8644	5.81252	6.57298	5.41382	6.71128	6.15234	7.71329	6.84449	5.90685	7.7261	7.60806	7.7334	6.39565	7.11028	8.20031	5.71487	8.25409	6.46907	6.00211	6.45843	6.31161	6.87341	6.53231	6.69974	9.1776	5.57545
ADRB1	7.95887	7.56425	7.04271	8.24963	7.37296	7.53858	7.24125	7.9566	7.15686	7.82166	7.91487	7.84831	7.34941	7.06756	6.80246	7.34123	7.57457	7.93354	6.51131	6.87969	7.62504	7.75771	7.56469	7.18516	7.44484	8.25282	6.76419	6.77633	7.1191	7.13931	7.29173	7.03032	7.00887	6.8097	6.92372	8.09487	7.42475	7.50502	6.74997	7.14868	7.0383	6.8859	7.63367	7.48854	6.84125	7.50912	7.36673	6.53498	6.87881
RASGEF1B	6.26643	5.78637	6.39878	6.25386	6.29235	6.47142	6.09275	6.73845	6.31216	5.96942	6.28235	6.11917	5.97795	6.5214	6.17828	6.57415	6.29371	6.26147	6.20231	6.14692	5.99813	6.08758	6.40859	6.89362	5.96851	7.00549	5.53547	6.13675	6.37073	6.67908	6.38936	5.77235	6.32418	6.45802	5.58064	5.92391	6.18737	6.00407	6.03193	6.59446	5.95703	6.3611	6.14587	6.34201	6.58768	5.83829	6.00079	6.09303	5.86132
MGC32805	5.30302	4.99427	5.53804	5.6096	5.6718	6.23103	5.1141	5.94438	5.76582	4.84295	5.27028	5.43705	6.5657	5.63914	5.07859	4.92601	5.29077	5.66933	5.5129	5.57828	5.61056	5.52175	4.90453	6.06423	4.99294	6.37871	6.18805	5.14802	4.93346	5.61787	5.01518	4.74617	5.53982	5.02817	6.66392	5.10612	6.26026	4.93615	4.87074	6.50909	5.67054	4.55933	5.73674	6.26052	4.66413	5.6191	4.69209	5.59392	5.69264
SPINK13	3.89246	4.43533	4.03813	5.06415	4.19245	4.08605	4.04658	3.83085	3.99188	4.04473	4.08146	3.89647	4.0689	4.10942	4.08086	4.78628	4.02124	3.88211	4.55915	4.14894	3.7298	3.77422	4.06056	3.96907	3.75731	4.05749	4.24118	4.13605	3.94345	4.09784	3.82143	3.74401	4.40887	4.18628	4.03009	3.98453	3.86575	4.7118	4.219	4.09574	4.33397	4.08244	3.98266	5.01965	4.75611	3.78464	4.71681	4.62202	4.1552
MBLAC2	4.26042	4.40366	4.53425	4.13729	4.18216	4.49525	4.30211	4.82264	4.66585	4.37867	4.2949	4.29842	4.40427	4.07134	4.50237	4.24991	4.13485	4.45233	4.23469	4.31138	4.45298	4.29687	4.72997	4.44991	4.51001	4.21424	4.73153	4.36569	4.14531	3.84627	4.43224	4.60894	4.9389	4.35549	4.30836	4.59603	4.37779	4.61909	4.71933	4.5256	4.38537	4.46901	4.41263	4.12322	4.41838	4.2734	4.30577	4.3005	4.26533
SRFBP1	7.41332	7.71114	7.12953	7.66732	7.50213	7.24158	6.96331	7.49476	7.21709	7.0999	7.38941	8.12356	7.78432	7.95546	7.47403	7.23271	7.08525	7.33869	7.38109	7.19578	7.05028	7.46572	7.28248	7.25565	7.48453	6.95994	7.4504	7.50242	6.86719	8.34951	7.49815	7.49381	7.44698	7.13814	7.59697	7.68173	7.41571	7.25307	7.08304	7.05887	7.20099	7.26259	7.18361	8.3507	7.44758	8.19431	6.95554	7.45855	7.2246
BTNL9	10.108	9.95165	10.0081	10.4043	10.3389	9.73053	10.0294	9.40629	9.57608	9.30051	10.5011	9.76224	9.50655	9.91371	8.99864	9.9212	10.2451	9.76538	8.67658	10.0338	10.1528	9.89807	10.0061	10.049	9.86399	10.1414	8.50787	10.1696	9.83304	9.22975	10.1698	8.47787	8.85033	10.4671	9.92842	10.1398	9.57835	9.82814	10.0645	9.38801	9.09056	9.98328	9.27817	9.81358	8.65597	9.91169	10.1533	8.85158	10.0953
FAM81B	7.03894	7.21316	5.02401	5.16978	6.91529	5.62538	8.40142	6.45575	6.14264	9.48444	7.12705	7.00083	4.90327	7.95321	7.64941	7.14164	6.65024	5.31301	9.99237	9.35277	8.56695	5.87134	7.57205	9.20037	6.56449	8.62533	8.1473	7.01522	8.04818	7.45309	9.33895	7.62412	5.81288	5.99317	5.00304	6.79007	7.99151	6.90309	4.42845	5.58407	9.67441	8.52517	7.93338	6.20982	6.8029	9.1316	9.75361	9.99918	9.34376
LOC153684	6.27248	6.31327	6.03278	5.38181	6.31108	5.8677	6.17273	6.25074	6.25398	6.21045	5.78254	6.24761	5.71107	6.09985	5.63096	6.26368	6.29296	6.53823	6.48784	6.49353	6.40761	6.41134	6.38229	6.36418	6.13948	6.64768	6.41327	6.27143	6.64353	5.84459	6.41037	6.35438	6.21568	5.72817	6.04936	6.49924	6.60042	6.03289	6.58308	6.87518	6.55034	6.17784	6.41612	5.80168	6.05778	6.26074	6.99603	6.50577	6.21241
PRELID2	6.34756	6.13344	5.71346	5.98747	5.99613	6.13642	6.64	6.2483	6.93932	6.4451	5.90677	5.73797	5.99165	5.80483	6.78451	6.40358	6.42787	6.46206	5.96521	6.18006	6.52051	6.0411	6.276	6.79832	6.45845	6.30427	7.48651	6.32471	6.289	6.59412	6.53981	6.01518	6.49822	6.27823	6.13064	5.84199	6.50682	6.21205	7.24492	6.17086	6.47076	6.3067	6.1583	6.01022	6.38354	5.82258	6.35423	5.79811	6.25305
CYLC2	2.79807	2.8453	2.74691	3.0204	2.75154	2.73676	2.78471	2.74568	2.89973	2.78265	2.55624	2.64131	2.68873	2.77865	2.7682	2.92496	2.79145	2.94506	2.71147	2.50663	2.80729	2.99762	2.85948	2.76624	2.97851	2.74682	2.74077	2.84517	2.61428	2.97122	2.51458	2.89216	2.81559	2.86166	2.92448	2.68942	2.59531	2.63317	2.77313	3.08786	2.52446	3.02224	2.72826	2.67262	2.90803	2.74054	2.75837	2.71574	2.4833
CNKSR3	7.09916	6.98931	6.0262	7.60001	7.00702	6.40401	6.50517	5.75741	6.09905	5.92337	6.54102	7.54199	6.91104	6.78991	6.54174	6.33522	6.57556	6.55151	6.71067	6.17005	6.2025	6.97298	6.06856	5.83363	6.48167	6.30317	6.17917	6.31273	6.0985	7.33407	6.64902	6.61851	6.23839	6.08601	7.31309	6.77248	6.7227	6.20847	6.41752	6.00896	6.57099	5.87165	6.07851	7.47359	6.57329	7.12369	6.44675	6.76072	6.505
SAMD3	5.40346	5.47732	4.54258	5.29588	5.33771	5.1784	5.08271	5.08326	5.17452	5.46561	5.53485	5.2055	4.16911	5.3684	4.93884	4.54953	4.58573	5.5663	5.89105	4.54021	5.93717	5.4401	5.04303	5.31889	5.09396	5.09093	5.10282	4.76994	5.19802	5.17405	5.52603	4.52491	4.75976	5.04756	5.56218	5.42067	5.71125	5.1269	5.75879	4.80194	4.66798	5.43456	4.90514	5.13717	5.06099	4.68567	5.02773	5.77549	4.7665
SLC2A12	6.69999	5.74826	7.1583	6.44487	6.41437	6.63779	6.56357	6.48911	6.92506	7.47539	6.58442	6.34238	6.55373	5.96792	6.498	7.00495	5.94046	6.56301	6.17225	6.70555	6.88776	6.80231	6.68458	6.54934	6.54401	7.39124	6.19582	6.08053	7.46837	6.54599	6.35664	5.83593	6.32171	6.72454	6.75147	7.01537	6.83188	7.22848	6.20322	5.9657	6.15277	6.63877	6.93237	5.71845	5.98889	6.59284	7.24786	6.21879	6.63236
PNLDC1	4.3644	4.40653	4.321	4.66434	4.97588	4.23046	4.21753	4.33943	4.69367	4.6259	4.17023	4.27046	4.4316	4.60719	4.52138	4.20263	4.43411	4.27609	4.32477	4.24111	4.39912	4.35222	4.45282	3.97622	4.34242	4.98086	4.62038	4.20039	4.5267	4.13538	4.42246	4.01731	4.4786	4.19035	4.57919	4.36114	4.94186	4.18298	4.30063	4.1426	4.51191	4.37325	4.61694	4.10401	4.16335	4.5606	4.68093	4.29769	4.24187
NKAIN2	2.7747	3.12547	3.03337	2.77517	3.16316	2.87045	2.78076	2.94547	2.71577	2.86162	3.12065	2.81962	3.03775	2.89011	2.83574	2.86446	2.91785	3.07308	2.94107	2.86197	2.83818	3.07241	2.73634	3.08219	2.97042	2.81178	2.83205	2.82412	3.96929	2.74201	3.07819	2.69893	2.88814	2.93945	2.94095	2.71802	2.96968	2.78118	2.85886	2.79514	2.95837	2.97483	2.98407	3.29323	3.01867	2.73614	2.78209	2.83303	2.86454
CYP1A1	6.19336	5.94032	6.04797	6.02155	6.114	6.87461	5.92594	6.77235	5.9895	6.04424	5.56034	6.15835	5.92178	6.41162	6.62454	6.16066	6.09146	5.59023	5.43092	6.24359	5.49266	5.61964	6.19397	6.31588	6.37633	6.0103	6.84002	5.66644	5.59994	6.22044	5.59061	5.88513	5.59199	5.93789	6.23645	6.14997	6.21713	6.06567	6.10237	7.85915	5.67367	6.83437	5.75629	5.89271	6.95669	5.98825	5.61273	5.49627	6.16978
CFAP206	7.01869	7.08528	6.48341	6.48476	6.82143	6.59469	7.59353	6.55957	6.65709	8.58447	7.20371	6.88102	6.49578	7.58801	7.22866	7.09723	6.93031	6.47504	9.05272	8.95438	8.13749	6.32818	7.38933	8.32733	6.74388	7.93935	7.57637	7.05947	7.49406	7.29011	8.3908	7.60586	6.51096	6.62106	6.37132	7.11755	7.40927	6.96031	6.3884	5.78657	8.71913	7.74836	7.34686	6.70275	6.78925	8.29209	9.14861	9.00296	8.89401
CYP1B1	8.90563	9.20255	8.88707	8.42578	8.88733	9.50683	8.4962	9.34479	8.9023	8.52427	8.87292	9.31421	8.61138	9.92876	9.04931	9.17778	9.02398	9.07351	9.04042	8.97403	8.60278	9.28969	9.78737	8.93406	9.76324	7.4692	9.14478	8.9779	8.96202	10.2965	9.13151	9.76194	9.15639	8.27399	9.41967	8.76375	8.79788	8.44577	8.5049	10.1026	8.20614	10.0229	9.37302	9.845	9.08783	8.99006	8.27514	9.12681	9.00149
RUNDC3B	7.42107	5.86161	7.85911	6.7023	7.41102	6.82404	6.22711	6.30661	8.4586	6.65305	6.56784	4.46274	7.01391	7.41574	8.27619	6.56541	5.52708	7.25744	8.03395	8.44992	7.18494	7.37421	6.35995	7.19886	7.34448	6.46786	7.94787	6.39455	6.54451	8.07104	7.12718	8.12662	7.86626	7.97557	8.23982	4.64403	5.9757	5.9671	8.46992	4.76112	8.3918	5.51367	7.48398	6.15353	7.79483	8.14425	8.5261	8.07623	8.53041
ABCA13	2.98057	3.32235	3.34273	2.96403	3.14158	2.98894	3.01471	2.85412	2.73338	3.47818	3.55212	3.08854	3.11698	3.40202	3.53937	4.0552	3.00887	2.9612	3.33937	3.42365	4.41357	2.97687	3.09081	3.85053	3.43992	3.13877	3.25463	2.93758	3.21767	3.35142	3.50377	3.12309	2.92065	3.1892	2.77487	3.0995	3.36375	3.09307	2.81074	2.9839	3.49576	3.03216	2.99808	3.03247	3.08646	4.03336	3.96102	3.43545	3.32522
IQUB	4.52374	4.81981	4.26266	4.74681	4.76094	4.54904	5.17562	4.63323	4.18018	5.68992	4.78011	5.10013	4.43835	4.86488	4.62158	4.67205	4.74934	4.40508	6.41684	5.5894	5.44343	4.82829	4.74712	6.00362	4.79361	5.44076	5.13597	4.5606	5.41574	5.12718	5.71548	4.82173	4.28545	4.48732	4.31403	4.50846	5.04051	4.7643	4.24526	4.28006	5.45743	5.07746	5.01542	4.47051	4.70776	5.83872	6.71674	6.37637	5.5047
CYP2A7	4.67899	5.44964	5.46194	5.04838	5.06662	5.25519	5.53363	5.17666	4.62541	5.09253	5.33119	5.36683	5.48464	5.47006	4.8029	5.11371	5.3161	5.38754	5.27004	5.27771	5.56778	4.98019	4.925	5.22113	4.77765	5.86845	5.04813	5.66602	5.57172	4.7521	5.12204	5.36949	5.18897	5.06965	5.44292	5.42678	4.68355	5.31529	4.79991	5.25737	5.33888	5.22735	5.17001	4.99247	5.34448	4.97985	5.59709	5.41154	5.56246
TMEM213	7.33937	6.63806	5.21544	7.53618	5.46913	7.98357	4.73677	6.48641	8.65965	5.37063	5.11262	5.77918	6.57497	5.03411	7.29938	5.77347	6.83364	6.69981	5.19708	6.54713	5.35648	4.95947	6.7462	6.06891	5.06798	5.24093	9.0384	5.08912	8.52024	5.18889	6.30237	5.6064	7.53432	5.96965	6.84199	9.49836	8.28367	4.83608	7.34955	7.32815	6.26269	5.66017	4.78915	7.50201	6.0911	4.79516	7.00953	5.22076	6.37585
GIMAP8	7.74835	7.51803	7.46427	7.84546	7.34559	7.2675	7.23176	7.69266	7.48607	7.9119	7.57039	8.28625	7.12237	7.06508	6.86855	7.90964	7.76552	7.73953	6.61852	7.50843	7.54848	8.07478	7.78491	7.29144	7.42387	7.99553	6.90739	7.22384	7.29216	7.14109	7.59417	7.09943	7.28204	8.16771	7.54451	8.28199	7.95981	7.76977	7.2014	7.00733	7.07803	7.1425	7.30523	7.72568	6.46428	7.24229	7.44465	6.85138	7.56143
METTL27	6.15479	6.85424	7.03375	6.53781	6.9422	6.42226	6.57593	6.57879	6.80962	6.04275	6.26797	6.20659	6.53292	6.37012	6.43647	7.36507	6.29046	5.74869	6.70312	7.7873	6.31552	6.79282	6.40311	7.01271	7.2059	7.18953	6.80912	6.21737	6.62317	6.06709	7.2312	6.49508	5.8307	5.98577	6.70811	7.01987	7.01377	7.01077	5.92649	6.18269	7.3799	6.08643	6.5408	6.03921	6.7731	6.5	7.79233	6.73959	7.75447
CYP2B6	5.2052	5.06708	5.54709	5.54893	5.51352	5.48042	5.37086	5.25778	5.16453	5.57155	5.31417	5.3841	5.2276	5.34594	5.33692	5.61622	5.45288	5.3085	5.43581	5.35337	5.13421	5.42908	5.43528	5.46916	10.0942	5.42493	5.07118	5.07983	5.24933	5.18594	5.24016	5.3583	5.30359	5.19757	5.50028	5.43799	5.20391	5.19257	5.25001	5.35542	5.26123	5.39634	5.2775	5.48686	5.40713	5.26821	5.43918	5.85958	5.55218
CYP2B7P	9.53468	9.93003	10.9726	11.0894	10.6237	10.7637	10.5443	9.36228	10.3178	10.3697	9.94661	8.48962	10.2867	9.06158	10.2839	11.7871	10.1009	10.4017	11.0985	10.7345	9.7953	10.5977	10.4703	10.7501	9.66784	10.5474	10.4062	10.2133	10.7253	10.3836	10.4933	10.2138	10.2813	10.793	10.7479	11.0554	10.0548	9.92872	10.1586	11.0474	10.4764	8.73084	9.81594	10.0346	9.95172	10.7532	10.9649	11.1234	10.7423
CYP2C18	4.81433	4.80035	4.96336	5.34804	4.88675	4.75585	4.68433	5.2476	5.39872	5.34806	5.00904	4.75362	4.43242	5.10281	4.87857	4.58576	5.0169	5.39925	5.75366	4.47894	5.58342	4.58893	4.79929	4.67548	4.73063	5.58427	4.71786	4.23825	5.14355	4.46825	5.61655	4.45468	5.4325	4.85433	5.00387	5.18592	5.26413	5.67859	4.74679	4.75052	4.66331	4.63188	4.48162	4.9888	4.83521	5.07555	4.4297	5.8101	4.47712
LOC157273	3.03904	3.11346	2.84047	2.99576	2.79182	2.94649	2.67868	2.77125	2.81955	2.60437	2.83253	3.07419	2.99577	2.81332	2.83523	3.05312	3.05888	2.67883	3.06545	2.88526	2.93341	2.83467	3.04736	3.06184	2.86845	2.78235	2.59261	3.06956	3.00715	2.84952	2.93029	2.96335	3.07305	2.87191	3.07253	2.85105	2.56506	2.8205	2.74509	3.15637	2.74193	3.0826	2.7607	3.05353	2.78387	2.93091	2.55902	3.0969	2.91252
CYP2J2	6.14006	6.46266	6.20937	5.89265	6.13804	5.91009	7.16522	5.98855	6.39994	6.93631	6.83866	5.94097	5.96084	6.48951	6.98021	6.47925	6.80158	5.94767	7.28317	7.33343	6.93645	5.75806	6.39452	7.1869	6.17408	7.17886	8.75092	6.8452	6.1245	5.66707	7.05331	6.07203	6.34263	5.89921	5.97447	6.18047	6.79063	6.22234	6.30565	6.15643	7.38788	6.45061	6.30263	6.14627	6.53924	6.64791	7.43448	7.12796	7.29444
CDCA2	4.67269	4.23299	4.84682	4.47504	4.92475	4.50604	4.43327	4.6352	4.79782	4.56994	4.34309	4.5892	4.89756	4.76009	5.60013	5.11826	5.73486	4.47148	4.57351	4.51346	4.90832	4.54679	5.28217	4.53299	4.67085	4.17928	5.00255	4.30201	4.52296	4.63473	4.93093	4.54119	4.67371	4.27238	4.5741	4.79398	5.0522	4.80068	5.08837	5.1322	4.84113	4.78808	4.41619	4.5517	4.91432	4.70638	4.25091	4.65118	4.50638
LINC00964	3.61232	4.28903	4.60032	3.57204	3.68157	4.22691	4.21736	4.35148	4.33057	4.39536	4.60417	4.05279	4.11382	3.62197	4.20545	3.87843	4.20617	5.37826	3.97159	4.59085	4.31087	4.59039	3.99438	4.4562	3.43411	4.09736	4.68226	4.31641	4.1437	4.01591	4.19198	3.87803	3.76263	4.98716	4.04143	3.85596	4.72085	3.882	4.43268	5.56962	4.29181	4.05305	4.18459	4.09214	4.04013	4.62224	4.11037	4.00314	4.68561
RDH10	8.29356	7.88126	7.78168	7.93695	7.78512	8.05912	7.19425	7.68611	7.57506	7.16479	7.33157	7.78081	8.0628	8.80219	7.526	8.2135	7.49776	7.77617	7.67827	7.35229	7.36901	8.03143	7.43626	7.39403	7.91853	7.29564	6.81528	7.35631	7.71782	9.27572	7.43574	7.5601	6.96707	7.49308	8.05545	7.19617	7.77693	7.33013	7.05279	7.81893	7.57402	7.68705	7.34412	8.5174	7.41474	8.10284	7.09334	7.76965	7.40763
FBXO16	5.12666	5.69024	5.44413	4.7322	4.84153	5.51431	5.9082	5.73471	5.21218	5.91762	5.19705	5.24843	5.21226	5.48032	5.34413	5.33038	5.479	5.04257	6.82504	5.80644	5.88537	4.99044	5.59672	5.58999	5.23869	5.60482	6.39006	5.5741	5.87938	4.90712	5.40376	6.06513	5.43316	4.82544	4.58231	5.57624	5.17484	5.39417	6.02984	5.33038	5.98107	6.01199	6.0228	4.7387	5.97055	5.22019	6.33558	6.7747	5.7771
CYP3A5	6.42855	5.60808	6.21463	6.85409	7.12291	6.14907	6.58874	6.8555	6.82159	6.86059	6.85809	7.31507	6.29731	6.81514	5.48587	7.0607	6.17074	6.86586	5.38554	5.35396	6.60358	6.85304	6.32732	5.33086	6.49811	6.78158	6.3902	6.7414	6.19506	5.98506	6.35124	6.49319	6.26017	6.45585	7.16841	7.04228	6.42091	6.7501	6.08287	5.47579	5.6545	6.55276	6.63839	7.1845	5.82025	6.35503	6.74605	5.56799	5.34524
SLC7A13	3.20392	3.10452	3.09721	3.19932	3.10347	3.13001	3.03576	3.14184	3.05621	2.92883	3.0968	3.00106	3.07675	3.13168	3.19179	3.0861	3.14358	2.99926	2.79255	2.98373	3.08532	2.77879	3.34898	2.90249	2.89576	2.90521	2.99348	3.03862	3.03972	3.04017	2.98429	3.07955	2.91299	3.02867	3.07532	3.10801	3.31475	2.99962	2.93688	2.84071	2.81003	2.90185	2.98124	3.09519	2.93571	3.03919	3.04469	2.79488	2.99892
C8orf48	6.27864	6.46623	5.66634	6.21212	6.67889	5.69488	6.37297	6.10659	6.06726	5.53407	6.50288	6.73767	6.56736	5.25805	6.22018	5.80749	6.65259	6.17002	6.91085	6.9497	6.61341	5.65744	6.2301	6.27353	5.99111	6.07186	6.43359	5.84781	5.98908	5.09091	6.49573	6.592	6.7971	5.73308	5.61917	6.88128	6.0806	6.51286	6.25303	5.10208	6.76255	6.23541	6.33803	6.28555	6.54647	6.21023	6.84981	6.97593	7.00237
SBSPON	7.1415	6.54366	6.58708	6.92564	7.24013	6.38116	7.64144	6.5408	5.97113	6.71616	7.26202	6.9203	7.18436	5.37342	6.53993	6.71898	7.48673	7.34399	5.68897	6.91408	7.00431	6.5573	7.25335	6.45688	7.13698	6.99067	6.20199	7.00507	6.21212	6.61708	6.92997	6.93412	6.62145	7.26649	6.55667	7.45264	6.43817	7.25053	6.46599	6.05282	6.73351	6.20022	6.4094	6.9691	6.72494	6.27856	7.29138	5.57421	6.80181
DOCK8-AS1	5.08082	5.22588	5.04836	5.34663	5.34511	5.62332	5.34364	5.82204	5.30132	5.63306	5.73047	5.53662	5.31955	5.2759	5.38022	5.34713	5.26482	5.24151	5.04335	5.77091	5.34323	5.30026	5.55636	5.10258	5.26664	5.45328	5.23585	4.96099	5.93878	5.01195	6.06062	4.68546	5.75599	5.03336	5.17194	4.85527	5.24869	5.34105	5.04713	5.05387	5.32662	5.38601	5.15925	4.84878	5.34168	5.27373	5.28607	4.9528	5.86192
CYP4B1	11.7344	12.4724	11.9131	12.1202	12.5817	12.36	10.06	10.9696	12.3968	12.6041	12.4819	12.352	12.5089	11.0168	11.9043	12.348	12.4421	11.8685	12.5884	12.5837	12.5733	11.557	11.7896	12.4811	11.974	12.4256	9.84303	12.0913	12.3665	10.3943	12.5804	11.2163	12.5949	12.5741	12.2404	12.3848	12.2217	12.8432	12.0839	12.5809	12.6767	10.8147	11.5237	12.0571	12.1439	12.6451	12.8988	12.5779	12.5946
CYP7A1	3.27933	2.95128	2.87494	3.12609	2.85197	3.11296	2.73844	2.78925	2.7904	2.65169	3.12032	3.06069	2.90824	2.91313	2.55691	2.79264	2.80799	2.71605	2.83268	2.55292	2.8177	3.23899	3.10059	2.67449	2.95123	2.67081	2.64777	2.52144	2.66769	2.99456	2.81834	3.23376	2.85454	2.76137	3.29551	2.68722	3.23518	2.66186	3.08226	3.01856	2.77167	3.00222	2.9337	3.03625	2.8953	2.71766	2.86561	2.99233	2.68884
FAM201A	4.4607	4.70891	4.85409	4.68942	4.9428	4.65736	5.06243	4.73067	4.80471	5.13628	5.21133	5.3393	4.3198	4.07116	4.89935	4.55243	4.93246	5.27603	5.46859	4.74876	4.79086	4.67427	4.71459	5.12366	4.8582	4.87763	5.37417	4.67075	4.59323	4.19562	5.46968	4.36231	4.8449	4.61182	4.38972	4.99617	5.3901	5.09704	5.06727	4.65339	5.04814	4.60874	4.71806	4.59313	4.77973	4.4682	5.03923	5.3048	4.6751
TTC16	5.26785	5.3851	4.75784	5.0055	5.37993	5.04889	5.54804	5.12899	4.81649	6.21366	5.40423	5.29153	5.10901	5.57986	5.61757	5.24515	5.07936	4.79159	6.17965	6.11407	6.14958	5.00184	5.35537	5.7561	5.02489	5.68556	5.57576	5.37737	5.70515	5.42355	6.31914	5.27946	4.96165	5.06702	5.16947	5.23254	5.70688	5.17273	4.7047	4.79589	6.25561	5.7346	5.30725	5.01976	5.07768	6.14743	6.49592	6.18622	6.04993
CYP11A1	5.43704	5.43939	5.88862	5.43435	5.75718	6.23736	5.63661	5.95638	5.77691	5.69367	5.49666	5.68201	5.74242	5.55498	5.50032	5.49964	5.43853	5.94301	6.11371	5.71239	5.32221	5.67904	5.53306	5.97218	5.72708	5.75691	5.86841	5.59819	6.2016	5.66503	5.90008	5.27576	5.254	5.51725	5.55006	5.29949	5.49008	5.59701	5.4588	6.41377	5.63318	5.7428	5.7509	5.59936	5.34928	5.76391	5.81953	6.21752	5.7326
FREM1	4.86371	4.39139	4.2264	4.79031	4.5068	4.59875	4.52911	4.81358	5.10473	4.22754	4.75607	4.32708	4.9193	4.74256	5.01477	4.69183	4.91338	4.56536	4.07159	4.5986	4.55105	4.4591	4.5035	4.61764	4.61358	4.35014	5.18844	4.53973	4.92974	4.66971	4.50876	4.18661	4.30896	4.4266	4.66244	4.59476	5.13185	5.1462	4.56106	4.58478	4.62664	4.8228	4.56695	4.72295	4.47323	4.16483	4.26991	4.18756	4.55186
SPAAR	8.3224	8.81451	6.85178	8.20599	8.12841	7.41522	8.62773	8.05721	8.18189	8.03932	8.0745	7.89367	8.57371	7.55545	8.8822	8.01774	8.38819	8.10436	6.52792	8.20688	8.22122	8.16484	8.93856	7.43636	8.59361	8.33215	7.57142	8.47914	7.82661	8.2481	8.48657	8.37056	8.25615	8.45227	7.80335	9.11788	8.44259	7.59956	7.88682	7.03849	8.43132	8.85575	8.30836	7.83438	7.78053	7.92815	8.06552	6.57487	8.21104
ATP8B5P	4.20914	4.17156	3.97921	4.56814	4.39882	4.26607	4.32247	4.26062	4.0165	4.04641	4.40611	4.63059	4.11769	4.30336	3.90337	4.41177	3.76769	4.59309	3.96293	3.97507	3.87106	4.45756	4.00943	3.95187	3.97566	4.01071	3.67449	3.57556	3.68706	4.5087	4.26464	3.77934	3.90298	3.87857	4.0894	4.1304	4.40749	3.75155	3.79434	3.88552	3.8562	3.89474	4.15745	4.3381	4.20716	4.87898	3.83849	3.93886	4.05621
PRUNE2	6.2797	5.71109	5.95424	6.21923	6.03622	5.41807	6.81345	5.95325	6.09154	6.02789	6.51009	5.35726	5.60993	6.09629	5.61556	5.92461	5.77316	6.34215	5.79639	6.16542	5.81325	6.2798	6.41061	6.13196	6.34708	5.76855	6.05066	6.21479	5.95303	6.12604	6.72957	5.52532	6.24274	5.57591	5.48238	6.69158	5.60545	6.15435	6.26979	6.15805	6.45682	5.7491	5.59953	6.37731	6.28209	5.7467	6.24607	5.79072	6.1641
CYP17A1	4.98402	4.77835	4.86487	4.86678	4.99685	4.81312	4.97835	4.86658	5.1372	5.03863	4.85481	4.51214	4.67212	4.85879	5.08678	5.26216	4.97532	4.91439	5.9115	4.8548	5.11899	4.88593	4.98136	4.80275	4.63643	5.06561	4.71806	4.63054	4.79556	5.43606	4.81747	4.77286	4.79119	5.0268	5.74791	4.68401	5.13329	5.0664	4.7523	5.11081	4.60524	4.57191	4.93988	4.74305	4.72515	5.13617	4.74831	5.99908	4.82347
FAM47A	2.98108	2.97247	3.19647	3.23228	3.31614	3.42648	3.04851	3.05314	3.14871	2.91928	2.96878	2.94974	3.17441	3.02283	3.2189	3.33637	3.2017	2.98856	2.92334	2.70338	3.13686	3.03956	3.13901	2.95641	3.06565	3.08538	3.16203	2.97387	3.00042	3.20112	2.97957	3.4246	3.12074	2.85699	2.98984	2.96919	2.85989	2.99906	2.9618	2.87189	3.40553	3.58553	3.31533	3.32026	2.71691	3.49157	2.87197	3.38843	2.78939
ARHGAP36	2.99969	2.97587	2.88697	2.86068	2.99934	3.19864	3.02939	2.98104	2.89621	2.99973	3.03811	2.72799	3.04698	2.99267	2.93631	2.79045	3.02749	2.93664	3.0052	2.99133	3.02445	3.06253	3.03694	2.99831	2.8037	3.09277	3.00172	2.68295	2.95586	2.95601	2.86126	2.94534	2.98087	2.91663	2.68789	2.94292	3.11433	2.64913	3.20424	2.99258	2.99973	2.74912	2.94006	3.02158	2.99381	2.96971	3.03516	3.02722	2.98644
RIBC1	5.90758	5.96538	5.53535	5.39174	5.88253	5.70442	6.38751	5.7733	5.66082	6.34841	5.9916	5.80989	5.64219	6.01617	5.83133	6.06025	6.02499	5.46549	6.8752	6.66567	6.35179	5.58032	6.09756	6.37462	5.7834	6.4537	6.0621	6.0514	6.36124	6.07769	6.33505	6.24533	5.60893	5.64724	5.64911	5.76853	6.18213	5.80887	5.57536	5.61788	6.57109	5.96491	5.94675	5.51589	5.80599	6.41025	7.15667	6.68712	6.65178
AKAP14	4.81074	5.28718	3.53559	3.73138	4.73105	3.87624	6.04674	4.08266	4.24662	7.09006	5.07755	5.26926	3.80687	5.34785	5.35258	4.88787	4.71672	3.50262	7.77	6.89999	6.65533	3.5098	5.39597	6.69212	4.41062	6.49573	5.63369	5.09666	6.14715	5.09094	6.98437	5.71175	4.03413	4.46647	3.54673	4.92651	5.67451	4.5445	3.48741	4.82756	7.19038	6.0095	5.74924	4.11036	4.56805	6.87924	7.15421	7.35505	6.69565
CXorf65	4.74716	4.67327	4.64494	4.82156	5.11502	5.17	4.87033	4.83985	4.56738	4.86762	5.01917	4.81368	4.60881	5.04446	4.33167	5.1993	4.60818	5.28111	4.99775	4.60887	4.82736	5.1762	4.67926	4.58836	4.91342	4.90858	4.79137	4.39011	4.24842	5.36092	4.84726	3.9502	4.7599	4.76308	5.45967	4.7311	4.98206	4.60557	4.45016	5.79608	4.85339	4.63256	4.45328	4.82755	4.87973	4.65044	4.00483	5.10775	4.66152
ZDHHC15	5.17116	5.20275	5.04218	4.92245	5.44178	4.92355	5.22188	4.91593	5.35617	5.13739	4.83757	5.05798	5.15276	4.74677	5.46417	4.38989	4.86341	4.76	4.96289	5.1073	5.23612	4.48931	4.75631	4.86532	5.1033	4.94648	5.2805	4.84009	4.89891	4.31761	5.26226	4.91074	5.41266	4.69117	4.89352	4.97013	5.15609	4.4751	4.79483	4.03393	4.84383	5.03305	4.70217	4.20294	5.18946	4.90004	5.16742	5.05926	5.12485
USP51	7.03983	6.83	7.1456	6.40516	7.04574	6.78757	6.8603	7.41421	7.37481	7.36203	6.90406	6.64068	6.87364	6.44171	6.95799	7.02014	6.53496	7.08338	7.06736	7.05078	7.54195	7.12171	6.80129	7.0026	6.83482	7.05265	7.24057	7.29771	6.9406	6.23768	7.24516	6.64461	7.03183	6.96711	7.03381	6.75581	7.32631	7.17914	6.96257	7.40788	7.2138	6.91161	7.06387	6.49358	6.81696	6.65325	7.45117	7.07864	7.07046
CYP24A1	2.5968	2.73404	2.657	2.55596	2.58079	2.67171	2.71758	2.79022	2.83475	2.79084	2.61632	2.70825	2.56672	2.72979	3.04615	2.78604	2.79694	2.4536	2.86431	2.90894	3.04282	2.72347	2.62138	2.83043	2.69751	2.79191	3.42323	2.65797	2.74064	2.76326	2.72344	2.76248	2.6526	2.73023	2.69945	2.88571	2.71096	2.66658	2.68022	2.90662	2.90531	2.76523	2.52889	2.61002	2.77147	3.20158	2.61729	2.88612	2.90594
SLC35G1	4.60184	4.59897	5.14806	4.56729	4.58458	5.58136	4.81171	5.32566	5.70261	5.36417	5.01066	5.15775	5.25999	4.9314	5.03894	4.10746	4.90409	5.20847	4.49562	4.21233	4.92722	5.14302	4.94369	5.42129	4.68315	4.46205	5.37208	4.1162	5.09109	4.79381	4.59283	4.73368	5.20622	5.02836	5.47293	4.68219	5.2551	5.27402	4.96368	5.08224	4.75998	5.56028	5.79139	5.08853	4.65672	5.39577	4.76666	4.31619	4.25668
CYP27B1	5.54186	5.41549	5.6235	5.49641	5.55962	5.26163	5.59645	5.35538	5.15593	5.40943	5.00487	5.74292	5.56902	6.30428	5.09898	5.41687	5.35945	5.45319	6.68469	5.26855	5.18783	5.29031	5.1968	5.03929	5.37172	4.96366	5.05993	5.29083	4.92663	6.2928	5.01209	5.13568	5.16392	5.12656	5.1914	5.21755	5.17195	4.79287	5.45143	5.61675	5.01318	5.41575	5.29839	6.73539	5.67586	5.65528	4.89916	6.82049	5.30345
CFAP58	5.00347	5.11996	4.7698	5.0206	5.30586	4.74475	5.84589	4.95823	4.94394	6.24274	5.66354	5.13364	4.75783	5.54781	5.37771	5.27034	5.09928	4.66811	6.65778	6.10581	6.12806	4.92299	5.38071	6.06786	4.86738	5.99578	5.44597	5.1452	5.54722	5.36186	6.04767	5.46021	4.89855	5.60175	4.83982	5.20023	5.80923	4.96747	4.76223	4.95135	6.18331	5.45259	5.62184	4.831	4.98475	6.29149	6.60263	6.68626	6.10721
DEUP1	2.70538	2.73635	2.63706	2.62729	2.71377	2.60118	2.84304	2.66597	2.73889	3.08884	2.82964	2.52809	2.5584	2.78092	2.94838	2.95283	2.72105	2.61032	3.22657	2.92608	2.98783	2.67314	2.94492	2.83096	2.67923	3.07552	2.88717	2.71055	2.94349	2.61682	3.03683	2.77905	2.49566	2.68613	2.5897	2.6887	2.90891	2.76288	2.57899	2.57455	3.03056	3.02398	2.74957	2.63918	2.74656	2.94821	3.50201	3.4484	2.89301
DAB1	3.58435	4.43124	3.99227	4.25086	3.51858	4.15789	4.00725	4.14477	3.78443	4.00322	4.01196	3.82407	4.03323	4.20408	3.98555	4.2772	4.10505	3.75023	3.82712	4.24506	3.6955	4.03154	3.81261	4.18117	3.97914	4.35508	3.83676	3.9564	3.69665	4.11219	3.91998	3.62615	4.08215	3.80606	4.06248	4.02584	4.0179	4.21724	3.91112	3.97357	4.00153	3.81953	4.01313	3.91725	4.07327	4.08677	3.86937	3.851	4.1858
C11orf65	2.73503	3.10663	2.60431	2.51874	2.57539	2.91033	2.94745	3.17289	2.90167	2.63405	2.32393	2.70873	2.77679	2.60716	2.60649	2.60698	2.90901	2.85605	3.26612	2.60342	2.68011	2.47281	2.72681	2.51951	2.86815	3.02271	2.97539	2.74531	2.85745	2.69958	3.45377	2.5912	2.80394	2.64222	2.58901	2.86933	2.81048	3.07558	2.54025	2.67582	2.7406	2.60112	2.99823	2.77868	2.86825	3.17538	3.07857	3.34073	2.95056
DACH1	8.8419	7.96177	7.76671	8.19457	8.24999	8.03534	7.89668	7.60606	8.56699	7.91458	8.44758	8.13972	8.27348	7.81039	7.88009	8.01562	8.14248	8.35633	6.85805	8.01033	8.19398	8.17039	7.99533	7.28508	7.84164	8.72023	6.48817	7.71813	8.52021	8.36655	7.64185	8.06592	8.00344	8.2403	8.3336	8.26935	8.17109	7.97878	8.22919	7.1394	7.81335	8.32867	7.92658	7.5679	7.79534	8.34924	8.40363	6.93949	8.05895
CLEC12A	6.88418	7.18676	6.36739	6.08521	7.35606	7.4084	6.04602	6.38692	7.00516	6.52377	7.44916	6.96175	6.4778	6.40146	6.77077	6.76819	6.92714	7.05574	8.01506	7.58429	8.1073	6.31877	6.91314	8.01221	7.28389	7.12938	5.98038	7.1831	6.33287	7.60791	6.54173	6.10419	7.32727	6.4085	6.76068	7.74555	7.12412	7.52719	6.69361	7.76944	6.64142	6.93948	6.7141	5.93241	7.1329	6.53264	7.15579	7.82911	7.1896
ALDH1L2	5.19897	5.67981	5.08937	4.7053	4.85369	4.94148	5.16843	5.44773	5.15064	4.78938	4.82615	4.87427	5.07095	4.7114	5.37156	4.78821	5.40062	4.81331	4.72197	5.25112	5.03437	4.5433	5.12024	4.94072	5.10134	4.82027	5.30444	5.2585	5.18485	4.64187	4.82157	5.6558	5.38662	4.79134	4.79157	4.9429	5.02993	4.9029	5.16475	4.83255	5.34072	5.43086	4.93104	4.98309	5.6727	4.62219	5.273	5.00406	5.21314
GPR180	5.53704	5.00248	5.07982	5.39271	5.17782	5.24205	5.61318	5.37455	5.46594	4.96085	5.27773	5.08717	5.30876	5.3497	5.345	4.7498	5.2687	5.33824	4.85801	5.40219	5.33905	5.27738	5.07848	5.1723	5.41311	5.02439	5.18599	5.25584	5.16357	5.17237	5.25073	5.63358	5.16265	5.00569	4.50234	5.56856	5.30112	5.25032	5.66	4.66405	5.30764	5.67467	5.49507	5.33105	5.24865	4.9192	5.01849	4.88168	5.29241
STOML3	4.86415	5.13517	4.26611	4.64061	4.7606	4.56438	5.92418	4.58365	4.64263	6.11184	4.93766	5.14617	4.65593	5.48788	5.93878	5.15531	5.16163	4.16413	7.72561	6.15241	7.08135	4.56124	5.97892	6.14139	4.72755	4.84193	6.02418	4.55953	5.42779	5.05684	6.24749	4.85937	4.75471	4.58911	4.47908	4.35051	6.06201	4.5863	4.31023	4.28238	5.87136	5.55014	5.58723	4.42994	4.57418	7.08953	7.43499	7.76175	6.07111
REM2	5.79684	5.77664	6.33502	6.44747	6.24829	6.14965	6.11125	5.99624	6.35371	6.11265	6.41857	5.96046	5.9365	6.3552	5.76871	5.97603	6.09866	6.46819	6.13293	5.93014	5.97508	6.1358	5.8619	5.76817	5.91708	5.86007	5.74427	5.74648	5.95926	6.17349	6.5071	6.00268	5.92581	6.11349	6.63562	5.91035	6.23049	6.37336	5.86009	5.95753	5.86314	5.7196	6.32798	5.73283	6.11676	6.183	6.3297	6.25846	5.98372
CFAP161	3.39421	3.81362	2.85959	3.0163	3.39821	3.2299	4.04634	3.17507	3.27435	5.40118	3.24284	3.87646	3.02351	3.88464	3.90304	3.71769	3.78406	3.08595	5.4522	4.45268	4.68657	3.22724	3.79669	4.54146	3.20513	4.66442	4.04717	3.75844	4.07168	3.87251	4.81969	3.72835	3.20074	3.49672	3.04493	3.48425	3.90345	3.61016	3.09182	3.41167	5.34957	4.48176	4.38513	3.0877	3.56659	5.31122	5.58468	5.57614	4.2855
DNAAF4	7.37993	7.24184	6.81869	6.9233	7.24453	7.12475	7.78405	7.26814	6.75799	8.36493	7.43552	7.04496	6.84186	7.2598	7.65139	7.71972	7.11014	7.1909	8.14572	7.86439	7.96874	6.80162	7.37461	7.91827	7.18016	7.72108	7.15724	7.3024	7.28402	6.9246	8.30479	7.26095	7.41297	7.20775	6.59311	6.44202	7.34012	6.793	6.75464	7.04746	8.48013	7.9184	7.80886	6.84136	7.28758	8.19876	8.63489	8.27265	7.86092
CSNK1A1P1	2.72207	3.36842	3.01069	2.66696	2.75112	2.98149	2.8628	2.59806	2.57732	2.59212	2.70516	2.88268	2.54907	2.79762	2.69893	2.92887	2.91547	2.78148	2.87909	2.87675	2.82949	3.01724	2.92222	2.99763	2.76349	2.88378	2.86814	2.91899	2.76956	3.04444	2.53751	2.96596	2.78164	2.92915	2.82598	2.71689	2.8361	2.91253	3.0493	2.87819	2.68829	2.66181	2.64826	2.67534	2.82481	2.84086	2.74141	2.90623	2.91058
ODF3L1	6.26313	5.61247	5.4838	6.0167	5.83682	6.0978	5.90704	5.91907	5.4269	5.03312	5.97755	5.87411	5.47039	6.14034	5.43037	5.46813	5.87776	5.93253	5.61128	6.27724	6.23688	5.78508	5.7944	5.07958	6.03618	6.6147	5.09672	5.46196	5.52783	6.59657	5.913	5.15279	5.02226	6.10516	5.54003	5.26675	5.25362	6.50717	5.36214	5.48946	5.31406	6.30276	5.76927	5.8104	5.95435	5.75841	5.82588	5.68997	6.30679
EXD1	2.7299	2.75508	2.87369	3.06735	2.83475	3.32419	2.7396	2.81052	2.99248	3.06154	3.06056	2.93991	2.91853	2.77289	2.85833	2.71167	2.98142	2.88712	2.78733	2.78103	3.25509	2.85716	3.09577	2.65819	2.64457	3.24786	2.80443	2.8255	2.91835	3.08162	3.02755	2.70298	2.60129	3.18825	2.6198	2.70943	2.69926	2.92538	2.63988	2.87421	2.92638	2.78348	2.69841	2.57769	2.74607	2.88687	3.13772	2.83573	2.78651
FSIP1	3.82322	3.82152	3.7828	3.78851	3.71124	3.43152	3.60923	3.57133	3.66155	3.7517	3.84557	3.66217	3.62584	3.63879	3.8696	3.8296	3.57599	3.58941	4.38005	3.7395	3.72281	3.62349	3.4964	3.68566	3.58054	3.90674	3.65315	3.80411	3.54744	3.76564	3.77368	3.75934	3.56674	3.7818	3.57978	3.54835	3.73456	3.45968	3.67855	3.50635	3.3706	3.69372	3.52975	3.90359	3.54316	3.55442	4.05999	4.59586	4.05494
BRINP1	4.2714	4.22419	4.51341	4.83104	4.10465	4.01426	6.17762	7.85007	4.61441	6.82972	4.34647	7.24004	4.20636	4.40605	4.08843	4.78995	5.65625	5.26693	4.10268	4.23434	4.2604	5.07308	6.30651	4.22981	4.21483	6.42925	4.31279	4.01874	4.88124	4.45423	4.50672	4.35521	4.0774	6.45924	4.61138	7.64915	7.40898	4.36288	3.96673	5.77144	4.40017	5.26843	4.4879	4.75245	3.94155	4.19712	4.35409	4.63952	4.29738
NAGS	7.11122	7.81091	8.11632	7.64761	7.47622	7.21747	7.86048	7.50672	6.86772	7.77226	7.62736	7.51784	7.46056	6.98426	8.06908	7.6026	7.14679	7.51181	7.60177	7.75937	7.75382	7.97515	7.35257	7.09425	7.60711	7.33263	7.18488	7.95782	7.5254	6.746	7.69385	7.94799	7.78952	7.72149	7.25896	7.61036	7.42413	8.34195	7.89897	7.94237	6.75383	7.55521	7.4192	7.53368	7.49724	7.20401	7.36993	7.65924	7.77048
PHOSPHO1	3.60392	3.66594	3.5792	3.69941	3.79951	3.6502	3.79911	3.95053	3.73416	3.75696	3.8591	3.74509	3.63923	3.77649	3.63484	3.8065	3.69253	3.73924	3.7866	3.86303	3.77302	3.77517	3.63364	3.55744	3.63405	3.74101	3.59501	3.77189	3.46278	3.70935	3.68378	3.91558	3.86754	3.72616	3.84451	3.77832	3.7833	3.60625	3.40865	3.58583	3.73861	3.5174	3.81911	3.66898	3.72225	3.72176	3.70532	3.79026	3.9493
DBP	6.48058	6.62992	7.6302	6.31726	6.37596	6.74562	6.40374	7.28351	6.90259	7.0773	7.07538	6.28973	6.45576	5.6859	6.93532	7.36101	6.38108	7.0519	6.59409	6.19141	6.36236	7.00998	6.65157	7.40063	7.03726	6.81807	7.47301	6.50219	7.25415	6.78801	6.72934	6.56719	6.62454	7.26366	7.66731	6.94938	7.78022	6.89411	7.22891	8.02918	6.67287	6.23762	6.44497	5.79549	6.08205	5.82446	6.33395	6.70977	6.33638
DBT	6.53598	6.68643	7.23681	6.62711	6.56382	6.74947	6.78496	6.66327	7.10636	7.15678	6.59973	6.58278	6.7488	6.57624	6.62811	6.80864	6.76	6.75029	6.70777	6.99627	6.8718	7.02065	6.84769	7.02924	7.04395	7.00708	7.08532	7.16739	7.30492	5.82572	6.66488	6.86866	6.92463	7.11694	6.96353	7.06382	6.94407	7.29815	6.91292	6.8529	6.61984	6.88979	6.84067	6.28899	6.57444	6.71235	6.83249	6.61679	6.86559
ZNF836	4.6428	4.8796	5.03954	4.65577	4.91315	4.51571	4.45704	4.9621	4.84757	4.84185	4.5882	4.84827	4.3625	4.47547	4.98545	4.91315	5.45517	4.76784	4.22494	4.68964	4.45561	5.11618	4.85512	4.65962	5.15199	4.60045	5.15512	4.4914	4.9957	4.9043	5.02774	4.62782	4.61633	4.80578	5.05206	4.97401	4.7592	4.99207	5.16946	5.23559	4.84928	4.78315	5.21335	4.77928	4.83473	5.33838	4.62554	5.04021	4.56034
ZNF610	4.95633	4.68824	5.31683	4.88913	5.09185	5.22636	5.00708	5.80459	5.93826	5.60267	4.51685	5.08196	5.08083	4.55936	4.71658	5.06545	5.03885	5.2014	5.14087	5.34451	6.04862	5.54056	5.4534	6.07104	5.29534	5.86249	5.90358	4.97833	5.31857	4.01995	5.10161	4.64239	5.34729	6.1496	5.1557	5.79884	5.25093	5.45155	5.56342	5.3618	5.07698	4.67909	5.1853	4.00185	4.75104	5.48466	5.89885	5.1217	5.30329
ZNF296	5.58631	5.8686	5.42388	5.95574	5.96548	5.68887	5.51042	5.57439	5.24469	5.70607	6.01411	6.1019	5.96806	6.12742	5.76525	5.66785	5.57714	5.67642	6.1327	5.90572	5.61666	5.55581	5.38352	5.44937	5.48125	5.52595	6.18496	5.76857	5.66498	6.03002	6.00947	5.77308	5.55346	5.11288	5.47184	5.65264	5.96536	5.80467	5.65588	5.94773	5.51161	5.50537	5.75842	6.01719	5.61024	6.04088	5.53327	6.14645	5.93952
OR7D2	3.67396	3.51154	3.37711	3.57372	3.80872	3.40458	3.61439	3.60813	3.41177	3.57051	3.51245	5.03209	5.06429	3.65731	3.32089	3.51456	3.80153	3.4802	3.52699	3.41608	3.72466	3.53393	3.59219	3.60522	5.50568	4.84704	5.49388	3.42308	4.79326	3.31646	3.13885	3.56452	3.81541	3.43022	3.70978	3.69289	5.47017	5.00588	3.28617	3.69327	3.46781	3.42796	3.56452	3.54384	3.72061	3.43872	3.2525	3.55216	3.4379
DCC	3.52792	3.26557	3.45175	3.63989	3.46578	3.40094	3.49932	3.49176	3.5348	3.68582	3.36573	3.65439	3.14698	3.85473	3.65496	3.45532	3.42981	3.36023	3.284	3.51335	3.72836	3.44997	3.78389	3.41536	3.38414	3.46614	3.3847	3.17479	3.86885	3.73804	3.24626	3.03008	3.25419	3.4334	3.22939	3.31815	3.22744	3.18357	3.11053	3.51588	3.29842	3.67294	3.89652	3.51725	3.26846	3.2485	3.24735	3.29203	3.49013
ZNF114	5.57838	5.84049	5.93146	5.07765	5.90476	5.68059	5.09402	5.92309	5.31774	5.68101	5.92409	5.81883	5.6775	5.26043	5.52682	5.96523	6.23625	5.79224	5.15445	5.0386	5.65976	5.73314	5.714	5.10986	5.4908	5.15689	6.54108	5.57646	5.56353	5.59363	5.59066	6.37724	5.3759	5.03482	6.62215	5.285	6.22015	6.20037	6.03304	6.25145	4.96069	5.31495	5.93746	5.37492	6.06286	4.94175	5.34383	5.06322	5.11051
ZNF540	5.22908	5.08952	5.42045	5.39179	5.19788	5.19331	4.82456	5.05313	5.22368	5.57624	4.96772	4.92751	5.02035	5.16245	4.60701	5.12449	4.91622	5.22497	5.28786	5.02205	5.43979	5.98465	5.3299	5.04022	5.2206	5.21632	5.03397	5.14701	5.69379	4.7865	5.16793	5.11204	5.3174	5.37558	5.67208	5.57039	5.6416	5.59792	5.10609	5.25784	5.04387	5.12219	5.14316	5.10414	4.92088	5.6947	5.56018	5.21435	5.01688
PLPPR5	4.3576	3.00599	3.02344	3.2748	3.88741	3.08871	3.50572	3.03509	3.08045	3.10008	3.00347	3.7737	3.1894	3.2978	2.97693	3.23926	3.07486	3.21489	3.12118	3.11023	3.94015	3.03693	3.12789	2.85708	3.14777	3.8313	3.21641	3.1684	2.99753	3.83303	3.09059	3.48439	3.1402	3.14215	3.9748	3.31822	4.55823	3.03033	4.22653	3.19089	3.09273	3.37254	3.27575	3.2579	3.2199	3.06788	3.22005	3.09442	3.08503
TDRD5	2.9315	3.12564	3.3653	3.13189	3.2549	3.02968	2.83274	2.96238	2.85839	3.05584	3.02242	2.95509	3.16928	2.86356	2.92914	2.92999	3.15733	3.23538	3.11697	3.11812	2.91923	3.20114	3.06202	2.94373	2.91243	3.29787	2.93886	2.7887	3.14234	3.02523	2.84083	2.99341	2.78161	3.00819	2.9315	2.72608	3.18858	3.11358	3.08225	3.11022	2.96942	2.90349	2.97286	2.98373	3.00183	3.23631	2.97678	3.15918	3.11252
ACE	7.87928	6.63619	7.01287	6.92676	6.68975	7.60781	6.55862	7.87069	7.661	7.08848	7.25888	6.4767	7.11049	6.81953	9.14894	7.22981	7.708	7.43008	7.90131	6.90997	8.16122	7.131	7.23094	7.68459	6.64702	7.13837	7.02887	6.8195	8.01387	8.42395	7.04721	6.5455	7.14827	6.61259	6.74333	7.22634	7.12246	7.58793	7.09203	8.14746	7.03599	6.88296	7.35504	7.27345	6.73659	7.33753	6.99993	7.96405	6.80083
KANK4	8.19025	6.77224	6.18698	6.10261	6.99622	7.04825	6.85782	8.73152	8.30096	6.9762	7.17193	6.83447	6.00791	6.39486	6.63831	7.3232	7.67542	7.90449	6.31597	6.92714	7.80276	6.783	7.59564	7.45694	7.76402	7.40756	8.69222	7.01183	7.77444	7.0437	7.51976	5.07437	7.19789	6.77086	7.06908	7.28747	7.52524	7.18271	6.38331	6.59301	7.00623	7.65036	7.36681	7.20678	7.15378	6.3159	8.49942	6.37021	6.91191
SASS6	6.43797	6.49822	6.67038	5.97495	6.26087	6.52683	6.82719	6.53512	6.80624	6.36743	6.40553	6.05323	6.41616	5.86645	6.76009	6.22297	6.62814	6.79342	6.17289	6.60428	6.52815	6.59914	6.68966	6.88339	6.73015	6.74749	6.88167	6.6903	6.53441	6.05528	6.42278	6.70958	6.85046	6.78802	6.35738	6.79608	6.63212	6.59687	6.96591	6.72762	6.64529	6.96456	6.48283	5.80038	6.32006	6.36483	6.52356	6.19384	6.60655
HFM1	2.70271	2.95889	3.19399	2.80584	2.82665	2.88017	2.75889	2.87496	2.97883	2.81911	3.13967	2.96554	3.17711	2.8206	2.66256	3.23595	3.01585	2.97826	2.81162	2.98773	2.80145	2.90747	2.80775	2.70352	3.40322	2.71253	2.83393	2.63721	2.67504	2.87417	2.8497	2.74117	2.69751	2.67358	2.85729	2.95205	3.20581	2.84156	3.01023	2.83196	3.0134	2.75558	2.90749	2.9592	3.07803	3.30511	2.83376	2.74469	2.89421
LRRN4	8.13967	8.57291	7.55057	8.13919	8.37508	7.62452	8.15822	8.10551	7.72383	7.75713	7.74511	9.21207	8.91517	7.86851	7.87255	7.56962	8.30747	8.55117	5.94325	8.44648	8.11305	8.17995	8.13711	7.63803	7.94627	8.30483	6.4182	8.5128	7.03043	8.24242	7.58221	7.62987	7.74077	7.77201	7.3396	7.83638	7.96371	7.1744	7.52923	7.1662	8.04606	7.17044	9.0633	8.44739	7.99989	8.81869	8.41369	5.97316	8.49486
AKR1C2	9.28404	10.2761	8.22073	9.75962	9.22505	9.92139	9.37247	9.35872	9.07048	8.26444	9.26561	9.09832	8.84166	9.34349	9.18907	9.73398	8.74826	8.99293	7.665	10.3473	8.73303	9.29327	9.70281	9.27812	10.0756	9.28249	10.397	9.7023	9.26136	8.68968	9.50334	9.78867	8.65263	9.2665	8.62378	9.92772	9.35362	9.18573	8.41404	9.2962	10.3357	9.34741	9.42031	9.76756	10.1455	9.92524	9.41985	9.1527	9.8227
WBP2NL	3.57366	3.46405	4.23624	3.31132	3.42368	3.15158	3.50138	3.96415	3.96306	3.31404	3.04423	3.54011	3.79012	3.7055	3.38878	3.43546	3.60719	3.62233	3.17198	3.43886	3.66967	3.50547	3.6611	3.13413	3.65365	3.59745	3.8378	3.12477	3.269	3.10772	3.61918	3.05058	3.23165	3.90451	3.36818	3.91219	3.62672	4.11728	3.89348	3.60179	3.39331	3.33736	3.44375	2.7567	3.6989	3.51668	3.43119	3.22651	3.46805
GADD45A	12.3354	11.2162	10.7122	11.8612	11.4466	11.0139	10.5982	10.9981	11.1344	10.877	10.6335	11.8493	10.7485	12.4561	11.0623	11.6918	11.4179	11.2069	11.4003	10.5107	11.0281	11.1313	10.4097	10.7095	11.1296	10.6641	10.7431	10.9115	11.1678	12.6055	11.304	10.4281	10.8172	10.6936	11.1907	10.8863	10.664	10.8873	10.6974	10.3311	11.5034	11.0108	10.9356	12.41	11.4916	11.8668	10.7656	11.4446	10.5918
DAW1	7.87497	7.49167	5.30809	7.5712	7.28091	6.17399	7.25059	6.60431	5.87151	8.62359	7.1768	7.61161	7.72882	7.62315	7.39846	7.1893	7.28533	7.49	9.00014	8.48478	7.29419	6.33637	7.44844	8.20439	6.72783	8.35876	6.60114	6.38744	7.64299	7.50579	8.23716	7.62665	8.30456	7.02656	5.88482	6.7405	7.23745	6.0903	7.3916	4.54971	9.17427	7.26288	7.24726	6.69527	7.53613	7.85612	8.63857	9.08434	8.46245
LONRF2	6.5328	6.07345	7.2173	6.97426	6.89513	6.9613	6.76396	6.2896	5.75031	6.77048	7.01067	7.10906	6.07522	7.30644	5.43587	6.59429	6.41267	7.2443	6.86318	6.36834	5.80922	7.06455	5.38473	6.1519	6.75464	6.7014	6.4514	5.88332	7.1702	7.25442	6.6784	6.167	5.76541	6.63732	6.69234	6.40913	6.54824	7.26022	5.60346	6.46127	6.62978	6.2061	6.51497	7.03851	6.53633	6.90383	6.71638	6.95109	6.4045
DDIT3	9.51826	9.39925	8.87667	9.19178	9.7535	8.52944	8.15253	8.71678	8.69705	8.55831	9.4301	8.85066	9.0705	9.23975	8.30425	8.56867	7.87017	8.91901	8.38815	8.33208	8.34845	8.77295	8.29497	8.30569	8.78718	8.69522	8.34029	9.59501	8.18622	8.44334	8.95355	9.25642	8.6191	8.53936	9.07534	8.54888	8.25694	8.26492	8.79452	8.83945	8.74901	8.37779	8.55034	8.26963	9.30843	8.48605	8.66393	8.41926	8.33475
CCDC138	4.53727	4.25133	4.35239	4.54646	4.75822	4.27527	4.69978	4.26704	4.42206	4.60205	4.60942	4.21734	4.50681	4.50911	4.50828	4.42571	4.32343	4.30601	4.81924	4.45463	4.54727	4.28804	4.55873	4.7264	4.37537	4.41075	4.92125	4.54868	4.279	4.27318	5.07905	4.65893	4.48812	3.96258	4.25217	4.31432	4.38012	4.31946	4.30109	4.15885	4.60402	4.81275	4.43868	4.17387	4.31223	4.85065	4.89055	4.8933	4.57532
TOGARAM2	5.96029	6.35464	5.00944	5.4473	5.85107	4.84466	7.17398	5.09985	5.91294	7.04204	6.40471	5.74734	5.63647	6.14538	5.97401	6.1027	5.55955	5.29404	8.02206	7.56721	6.55411	5.74288	6.07685	6.99006	5.90446	6.43623	6.34627	6.16215	6.0403	6.04222	7.74314	5.89086	5.48432	5.44048	6.01114	5.66068	6.08897	5.32592	4.859	5.04944	7.3842	6.33224	6.05195	5.71334	5.71678	7.25685	8.07484	7.98845	7.53656
PARP15	4.28131	3.83019	4.29638	4.28736	4.07199	4.32917	4.26408	4.22511	4.19468	4.14188	4.04808	4.10675	3.95981	4.3311	3.95022	3.83926	4.16457	4.05472	4.55323	4.28969	4.12244	4.06869	3.53314	4.13485	3.96353	4.24513	4.18268	3.94607	4.16555	4.49865	4.13157	3.92111	4.05039	4.1073	3.96397	4.15499	3.78769	3.94594	3.94504	4.85665	3.96296	4.36448	3.90073	4.30444	4.01003	4.45826	3.94781	4.74003	4.2757
SPTSSB	2.98793	2.93881	2.90756	2.86696	2.57738	2.65722	2.55252	2.60004	2.97079	2.75087	2.90172	2.97465	2.71036	2.59451	2.85903	2.87583	2.85329	3.08119	2.63879	2.74513	3.00989	2.7865	2.75418	2.93208	2.8081	2.77321	2.83806	2.68123	2.9186	2.99872	2.60536	2.66076	2.57001	2.62637	2.72762	2.60557	3.03217	2.90845	2.91808	2.73122	2.72464	2.91872	2.78185	2.62392	3.02909	2.8083	3.04322	2.89825	2.8092
XIRP1	5.94466	6.72551	6.13475	6.96124	6.77121	6.2986	6.68525	6.17491	5.90814	5.86535	6.41014	6.45718	6.17673	6.92644	5.94037	6.13362	6.50906	6.22787	6.39658	6.30431	5.83501	6.10652	6.28143	5.82082	6.02179	6.00935	6.02205	6.15547	5.81434	6.35573	6.15659	6.26408	6.43363	5.85448	6.14583	6.08792	5.92321	6.18798	6.29775	5.80178	6.14282	6.0779	6.04912	8.1346	6.4568	6.45726	6.02147	6.37507	6.29358
DDX11	5.8982	6.8686	6.16496	6.99796	7.12051	6.95735	7.25712	5.88184	6.2751	6.69593	6.87781	6.66032	6.87953	6.9515	6.40169	6.59181	6.75769	7.39531	6.29267	7.40102	6.84201	7.11561	6.86864	6.82116	7.24832	6.06382	7.26582	6.87185	5.99769	6.64407	7.08723	6.32285	6.23043	7.00554	6.68625	6.06162	6.92639	6.30624	7.42851	6.19448	7.09004	7.08233	6.02094	7.02993	7.2414	6.52616	6.95794	6.30335	6.95504
BBS12	6.64156	7.04979	7.10445	7.02372	7.3345	6.88101	7.71945	7.13296	7.08563	7.50029	7.39324	7.30798	7.3217	6.18497	7.28231	7.13566	7.34375	7.05968	7.62839	7.79192	7.42299	7.71108	7.84566	8.15709	7.7184	7.47748	7.48296	7.14621	7.46452	6.4619	7.68462	7.39872	7.41477	7.85432	7.10054	7.8752	7.53319	7.7991	7.44993	7.31816	7.58672	7.28037	7.44097	7.17864	6.8774	7.0667	8.14966	7.64988	7.74472
FREM3	3.21679	3.17656	3.44982	3.51898	3.46299	3.24925	3.58938	3.58817	3.33471	3.54969	3.14816	3.08178	3.20055	3.19814	3.98873	3.13038	3.18901	4.24744	3.2511	3.09831	3.63548	3.68142	3.06108	3.24214	3.59145	3.49696	3.58099	3.16818	4.11613	3.52705	3.62959	3.13843	2.77507	3.95474	3.72242	3.00481	3.14234	3.33673	2.97215	3.23025	2.92077	3.17618	3.29807	2.88647	3.03209	3.35727	3.54474	3.34539	3.18262
RASSF6	4.81468	5.31644	5.78143	4.95955	5.19896	4.88945	5.59454	5.59389	5.46426	5.82391	5.43441	5.30779	5.2913	4.96551	4.95177	5.61227	5.08466	5.23408	4.92081	5.63486	5.37496	5.61297	5.38688	5.14992	5.41084	6.02182	6.85065	5.16428	5.66285	4.16608	5.3492	4.84395	5.18831	5.16355	5.35269	5.56932	5.48826	6.07218	5.25627	4.88177	5.34574	5.17093	5.5181	5.37409	4.85532	5.61243	5.88078	4.97855	5.57475
DEFA4	8.00091	6.12595	6.29233	7.59813	5.96873	9.82909	7.05691	7.37243	6.89402	6.39061	6.48853	6.19883	6.83252	8.72979	7.53832	8.13886	9.01092	7.24253	4.77622	6.36864	10.9273	6.50377	9.45292	6.13211	6.82099	5.32473	6.05679	5.10369	8.75643	7.04965	7.80792	5.44151	5.48272	7.51604	8.5661	9.96239	6.1998	10.4474	6.83876	5.6617	7.24628	7.95628	8.0145	6.6627	5.39491	6.982	6.46765	4.6269	6.20606
SGMS2	9.25065	9.42568	9.375	10.1506	9.7749	9.79275	9.38517	8.51009	8.52155	8.83866	9.32622	10.2946	9.07345	9.96083	8.95228	8.81678	9.64472	9.13214	9.81292	9.27783	9.09923	9.44729	9.19214	8.96192	9.14099	9.46412	7.91535	8.81188	9.08139	10.7204	9.64568	8.74782	8.77776	8.5372	9.25386	9.49546	8.75325	9.74309	8.20386	9.11934	8.74983	9.27225	9.36965	9.88123	9.51261	10.0595	9.25835	9.89961	9.22937
CDC20B	4.29845	4.07847	4.33592	4.47647	4.10143	3.96601	4.40691	4.22433	4.09333	4.08527	4.22138	3.82351	4.50858	4.36418	4.22517	4.42677	4.68569	4.24719	4.73228	4.36848	4.3623	4.24355	4.37901	4.46406	4.30582	4.1176	4.38634	4.3913	5.01299	4.20271	4.07769	4.27665	4.24476	4.09946	4.08761	4.24267	4.24512	4.89648	4.04353	4.17051	4.49309	4.15588	4.25619	4.10061	4.3047	4.47295	5.00984	4.96466	4.69613
DEFB1	7.43762	6.58202	7.9109	6.22916	6.99435	9.00458	6.0526	8.2828	7.02691	5.84447	7.6582	6.68748	6.51736	6.69236	6.1822	11.3524	6.7686	6.62013	5.92624	7.21847	6.82135	7.81449	6.52466	5.59016	7.35507	6.73471	6.9591	6.78037	7.78974	9.27068	6.05077	6.46633	6.99551	6.76076	7.39231	7.26229	6.76803	6.31817	5.93176	6.35268	6.61774	9.10062	8.13881	5.6313	7.3608	7.77408	6.02542	5.94577	7.2655
NIM1K	5.52452	7.28483	8.26061	5.82748	6.49988	8.05053	7.99721	7.22075	7.7894	7.67816	6.47305	6.32747	5.44579	6.48505	5.79066	6.87827	6.64677	6.85388	6.08981	7.60369	7.56405	7.54104	8.17546	7.88344	7.94611	7.95953	7.15949	7.23409	7.20494	6.08096	7.06961	6.45682	6.7744	8.4143	6.62481	6.83077	6.07244	9.20654	7.09421	8.78309	6.0853	8.41879	8.40981	5.71574	6.56775	5.9262	6.51573	6.08985	7.62657
DES	7.08753	7.17914	6.80913	7.04561	7.03288	6.6834	8.42718	7.28225	6.40013	6.87013	7.12537	6.75717	6.78297	6.64241	6.35933	7.58358	7.1361	6.99438	6.32043	6.67213	6.45936	6.86267	6.76382	6.4078	6.52198	6.56674	6.48807	7.03162	6.8721	6.34952	7.77297	6.99744	6.76527	6.66965	6.64042	6.63533	6.65656	6.8035	7.02521	6.7897	7.46511	6.8282	6.49013	7.08959	7.1712	6.43576	6.69097	6.38064	6.6589
ZNF366	5.35377	5.52367	5.2282	5.20777	5.54972	5.28432	5.35984	5.8003	5.67697	5.65565	5.26802	5.41195	5.47039	4.7446	5.50828	5.53744	5.37002	5.29235	4.6469	5.60474	5.48562	5.93296	5.6287	5.48858	5.32267	5.75134	5.29017	5.70276	5.53791	5.03842	5.34624	5.86003	5.57528	5.9222	5.50599	6.24986	5.43167	5.34414	5.51651	5.19143	5.81859	5.48721	5.5547	4.90173	5.06921	5.30093	5.66554	5.38961	5.6443
PRSS35	5.49966	4.80304	4.34004	5.59481	5.21984	4.91703	5.39167	5.20633	5.08462	5.64167	6.09978	5.20566	4.86542	4.21224	5.7498	6.223	5.5237	6.32646	4.22423	4.17828	5.0319	5.09495	4.69584	4.36754	5.14963	5.5191	4.67213	5.05538	5.04736	5.07375	5.08135	4.83883	5.2448	5.23161	5.14285	4.73734	5.5723	5.44238	4.63688	4.66628	5.09569	4.9406	4.45193	4.68132	4.79881	5.27004	5.00089	4.27719	4.14149
LCA5	4.8519	4.66131	5.37999	4.82233	4.72472	4.87492	5.12609	5.11298	5.27457	5.82809	5.08892	4.90056	5.22975	4.89364	4.99779	4.63984	5.2123	4.98909	6.19038	5.55018	5.4838	5.26243	5.51449	5.96184	5.40756	5.45292	5.54423	5.24608	5.6543	4.76171	5.49434	5.27956	5.55231	5.77405	5.09645	5.34056	5.1244	5.41779	5.46901	4.75689	5.54935	5.50985	5.37563	4.80698	5.2096	5.50052	6.34414	6.03407	5.56084
DFFB	6.41023	6.6264	7.14094	6.35641	6.64221	6.73831	6.80522	7.08986	6.71149	6.75004	6.792	6.29508	6.84403	6.46507	6.38476	6.66299	6.66135	6.68512	6.76865	6.52861	6.9012	7.15495	6.99761	7.28652	6.64746	6.98441	6.96865	6.83633	6.81807	6.50467	6.51846	7.05602	6.95391	7.35762	6.8337	6.68964	6.58939	6.86634	7.10256	7.06475	6.55956	6.7979	6.95735	6.57332	6.73546	6.48706	6.57548	6.79628	6.49895
[truncated: 2,776 more rows]
[truncated: 161 more columns]

## Sheet: Supplementary Table S2
Supplementary Table S2. Infiltration levels of 22 distinct types of immune cells in the ischemia and reperfused samples based on CIBERSORT algorithm.
[truncated: 211 more rows]

[truncated: 2 more sheets: Supplementary Table S3, Supplementary Table S4]
